# Supplementary material for: Access to thiionized-, selenolized-, and alkylated 5-alkylidene 3-pyrrolin-2-one derivatives via a regioselective oxidative annulation reaction
Source: Royal Society of Chemistry journal article supplement (doi:10.1039/d3ob00014a), 2023-01-01
Supplement: d3ob00014a1.pdf [file d3ob00014a1.pdf]

# Access to thiionized-, selenolized-, and alkylated 5-alkylidene 3-pyrrolin-2-one derivatives *via* regioselective oxidative cascade annulation reaction

Donghan Liu,<sup>+a</sup> Siyu Song,<sup>+a</sup> Longkun Chen,<sup>a</sup> Mingshuai Zhang,<sup>a</sup> Zhuoyuan Liu,<sup>a</sup> Jiuzhong Huang,<sup>b,\*</sup> and Fuchao Yu<sup>a,\*</sup>

<sup>a</sup>*Faculty of Life Science and Technology, Kunming University of Science and Technology, Kunming, 650504, P. R. China.*

<sup>b</sup>*School of Pharmacy and Key Laboratory of Prevention and Treatment of Cardiovascular and Cerebrovascular Diseases of Ministry of Education, Gannan Medical University, Ganzhou, 341000, P. R. China.*

## Supporting Information

### Table of Contents

|                                                                                          |     |
|------------------------------------------------------------------------------------------|-----|
| 1. General information. ....                                                             | 2   |
| 2. Optimization of reaction conditions. ....                                             | 3   |
| 3. General procedure. ....                                                               | 5   |
| 4. Spectroscopic data. ....                                                              | 9   |
| 5. (1) X-ray Structure and Data <sup>3</sup> of <b>4b</b> (CCDC 2226645) .....           | 40  |
| (2) X-ray Structure and Data <sup>3</sup> of <b>7b</b> (CCDC 2226644) .....              | 41  |
| (3) X-ray Structure and Data <sup>3</sup> of <b>8b</b> (CCDC 2226646) .....              | 42  |
| 6. <sup>1</sup> H NMR, <sup>13</sup> C NMR and HRMS spectra for spectroscopic data. .... | 43  |
| 7. References and notes. ....                                                            | 188 |

## 1. General information.

All compounds were fully characterized by spectroscopic data. The NMR spectra were recorded on a DRX600 ( $^1\text{H}$ : 600 MHz,  $^{13}\text{C}$ : 150 MHz), chemical shifts ( $\delta$ ) are expressed in ppm, and  $J$  values are given in Hz, and deuterated  $\text{CDCl}_3$  and  $\text{DMSO}-d_6$  were used as solvent. The reactions were monitored by thin layer chromatography (TLC) using silica gel  $\text{GF}_{254}$ . The melting points were determined on XT-4A melting point apparatus and are uncorrected. HRMS were performed on an Agilent LC/MS TOF instrument.

All chemicals and solvents were used as received without further purification unless otherwise stated. Column chromatography was performed on silica gel (200–300 mesh).

2,4-Pentanediones **1w** and **1z** were prepared according to the literature<sup>1</sup>.  $N$ -((2Z,4E)-4-(phenylimino)pent-2-en-2-yl)aniline **10** were prepared according to the literature<sup>2</sup>. 2,4-Pentanediones **1a-1n**, primary amines **2**, disulfide **3**, diselenide **4**, ether, oxidants, iodine reagents and acids were purchased from Energy Chemical and Adamas-beta®. The specific substrate structure is as follows:

Substrate of 2,4-pentanediones **1**:

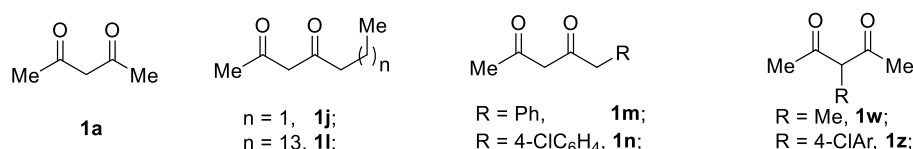

Substrate of primary amines **2**:

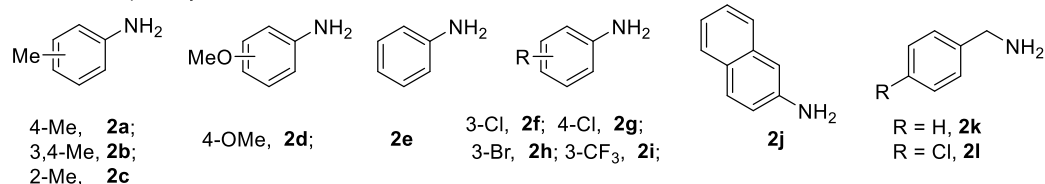

Substrate of disulfides **3**:

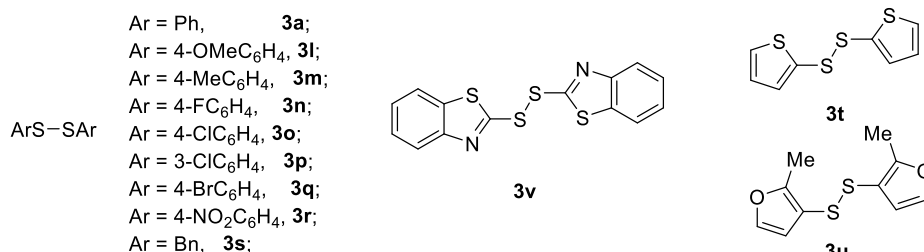

Substrate of diselenides **4**:

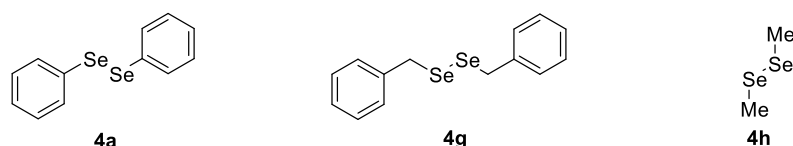

Abbreviations:

TBHP: *tert*-butyl hydroperoxide;      BPO: dibenzoyl peroxide;      TBPB: *tert*-butyl peroxybenzoate;  
 CHP: cumene hydroperoxide;      DTBP: di-*tert*-butyl peroxide;      DCP: dicumyl peroxide  
*m*-CPBA: *m*-chloroperbenzoic acid      DMSO: dimethyl sulfoxide;      DMF: *N,N*-dimethylformamide;  
 THF: tetrahydrofuran;      DCM: dichloromethane;      DCE: 1,2-dichloroethane  
 PE: petroleum ether;      EA: ethyl acetate;

## 2. Optimization of reaction conditions.

**Table S1.** Optimization of reaction conditions.<sup>a,b,c</sup>

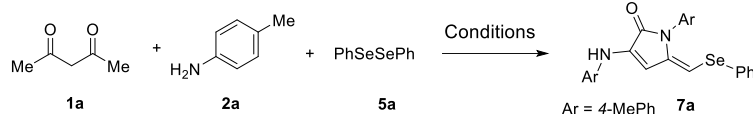

| Entry | Oxidant (eq.) | Catalyst (mol%)        | Solvent               | T (°C) | Time (h) | Yield (%) |
|-------|---------------|------------------------|-----------------------|--------|----------|-----------|
| 1     | TBHP (2.0)    | NH <sub>4</sub> I (20) | DCE/AcOH              | r.t.   | 14       | 49        |
| 2     | CHP (2.0)     | NH <sub>4</sub> I (20) | DCE/AcOH              | r.t.   | 14       | 56        |
| 3     | DTBP (2.0)    | NH <sub>4</sub> I (20) | DCE/AcOH              | r.t.   | 18       | n.d.      |
| 4     | BPO (2.0)     | NH <sub>4</sub> I (20) | DCE/AcOH              | r.t.   | 10       | 32        |
| 5     | TBPB (2.0)    | NH <sub>4</sub> I (20) | DCE/AcOH              | r.t.   | 14       | 21        |
| 6     | CHP (2.0)     | NH <sub>4</sub> I (20) | DCM/AcOH              | r.t.   | 14       | 63        |
| 7     | CHP (2.0)     | NH <sub>4</sub> I (20) | 1,4-Dioxane/AcOH      | r.t.   | 14       | 31        |
| 8     | CHP (2.0)     | NH <sub>4</sub> I (20) | THF/AcOH              | r.t.   | 14       | 58        |
| 9     | CHP (2.0)     | NH <sub>4</sub> I (20) | DMSO/AcOH             | r.t.   | 14       | 27        |
| 10    | CHP (2.0)     | NH <sub>4</sub> I (20) | DMF/AcOH              | r.t.   | 18       | trace.    |
| 11    | CHP (2.0)     | NH <sub>4</sub> I (20) | Toluene/AcOH          | r.t.   | 14       | 19        |
| 12    | CHP (2.0)     | NH <sub>4</sub> I (20) | <i>o</i> -Xylene/AcOH | r.t.   | 14       | 60        |
| 13    | CHP (2.0)     | NaI (20)               | DCM/AcOH              | r.t.   | 14       | 37        |
| 14    | CHP (2.0)     | KI (20)                | DCM/AcOH              | r.t.   | 15       | 39        |
| 15    | CHP (2.0)     | LiI (20)               | DCM/AcOH              | r.t.   | 13       | 42        |
| 16    | CHP (2.0)     | NH <sub>4</sub> I (20) | DCM/AcOH              | 60     | 10       | trace.    |
| 17    | CHP (2.0)     | NH <sub>4</sub> I (20) | DCM/AcOH              | 80     | 10       | trace.    |
| 18    | CHP (1.0)     | NH <sub>4</sub> I (20) | DCM/AcOH              | r.t.   | 14       | 38        |
| 19    | CHP (3.0)     | NH <sub>4</sub> I (20) | DCM/AcOH              | r.t.   | 14       | 14        |
| 21    | CHP (2.0)     | NH <sub>4</sub> I (10) | DCM/AcOH              | r.t.   | 14       | trace     |
| 22    | CHP (2.0)     | NH <sub>4</sub> I (30) | DCM/AcOH              | r.t.   | 14       | 55        |

<sup>a</sup>Reaction conditions: **1a** (0.1 mmol), **2a** (0.25 mmol) **5a** (0.06 mmol), catalyst and oxidant in 2 mL of solvent (v/v = 1/1).

<sup>b</sup>Isolated yields. <sup>c</sup>Determined by <sup>1</sup>H NMR of the crude product E/Z>99:1.

**Table S2.** Optimization of reaction conditions.<sup>a,b</sup>

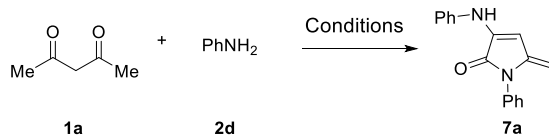

| Entry | Oxidant (eq.)                                      | Catalyst (mol%)                    | Solvent (v/v)         | T (°C) | Time (h) | Yield (%) |
|-------|----------------------------------------------------|------------------------------------|-----------------------|--------|----------|-----------|
| 1     | CHP (2.0)                                          | NaI (20)                           | Toluene /AcOH         | 80     | 14       | 53        |
| 2     | Oxone (2.0)                                        | NaI (20)                           | Toluene/AcOH          | 60     | 15       | trace.    |
| 3     | K <sub>2</sub> S <sub>2</sub> O <sub>8</sub> (2.0) | NaI (20)                           | Toluene/AcOH          | 60     | 13       | trace.    |
| 4     | DTBP (2.0)                                         | NaI (20)                           | Toluene/AcOH          | 60     | 10       | 32        |
| 5     | TBPB (2.0)                                         | NaI (20)                           | Toluene/AcOH          | 60     | 14       | 21        |
| 6     | BPO (2.0)                                          | NaI (20)                           | Toluene/AcOH          | 60     | 14       | 43        |
| 7     | TBHP (2.0)                                         | NaI (20)                           | Toluene/AcOH          | 60     | 14       | 55        |
| 8     | TBHP (2.0)                                         | NH <sub>4</sub> I (20)             | Toluene/AcOH          | 60     | 14       | 57        |
| 9     | TBHP (2.0)                                         | KI (20)                            | Toluene/AcOH          | 60     | 14       | 42        |
| 10    | TBHP (2.0)                                         | LiI (20)                           | Toluene/AcOH          | 60     | 18       | trace.    |
| 11    | TBHP (2.0)                                         | I <sub>2</sub> O <sub>5</sub> (20) | Toluene/AcOH          | 60     | 12       | 46        |
| 12    | TBHP (2.0)                                         | NH <sub>4</sub> I (20)             | <i>o</i> -Xylene/AcOH | 60     | 11       | 56        |
| 13    | TBHP (2.0)                                         | NH <sub>4</sub> I (20)             | DCM/AcOH              | 60     | 10       | 37        |
| 14    | TBHP (2.0)                                         | NH <sub>4</sub> I (20)             | 1,4-Dioxane/AcOH      | 60     | 12       | 39        |
| 15    | TBHP (2.0)                                         | NH <sub>4</sub> I (20)             | Anisose/AcOH          | 60     | 12       | 42        |
| 16    | TBHP (2.0)                                         | NH <sub>4</sub> I (20)             | DCE/AcOH              | 60     | 12       | 60        |
| 17    | TBHP (2.0)                                         | NH <sub>4</sub> I (20)             | THF/AcOH              | 60     | 12       | trace.    |
| 19    | TBHP (2.0)                                         | NH <sub>4</sub> I (20)             | DMSO/AcOH             | 60     | 12       | 54        |
| 20    | TBHP (2.0)                                         | NH <sub>4</sub> I (20)             | MeCN/AcOH             | 60     | 12       | 44        |
| 21    | TBHP (2.0)                                         | NH <sub>4</sub> I (20)             | DMF/AcOH              | 60     | 12       | trace     |
| 22    | TBHP (2.0)                                         | NH <sub>4</sub> I (20)             | DCE/AcOH              | r.t.   | 12       | 66        |
| 23    | TBHP (2.0)                                         | NH <sub>4</sub> I (20)             | DCE/AcOH              | 80     | 12       | 59        |
| 24    | TBHP (2.0)                                         | NH <sub>4</sub> I (10)             | DCE/AcOH              | r.t.   | 12       | 23        |
| 25    | TBHP (2.0)                                         | NH <sub>4</sub> I (30)             | DCE/AcOH              | r.t.   | 12       | 58        |
| 26    | TBHP (1.0)                                         | NH <sub>4</sub> I (20)             | DCE/AcOH              | r.t.   | 10       | trace     |
| 27    | TBHP (3.0)                                         | NH <sub>4</sub> I (20)             | DCE/AcOH              | r.t.   | 8        | 57        |

<sup>a</sup>Reaction conditions: **1a** (0.2 mmol), **2d** (0.5 mmol), catalyst and oxidant in 2 mL of solvent (v/v = 1/1); <sup>b</sup>Isolated yields.

**Table S3.** Optimization of reaction conditions.<sup>a,b</sup>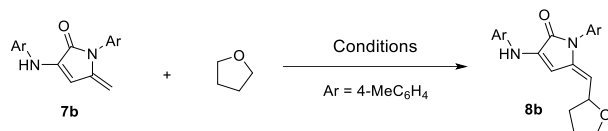

| Entry | Oxidant (eq.) | Catalyst (eq.)          | Atmosphere     | T (°C) | Time (h) | Yield (%) |
|-------|---------------|-------------------------|----------------|--------|----------|-----------|
| 1     | DTBP (2.0)    | CuBr (0.4)              | N <sub>2</sub> | 110    | 36       | n.d.      |
| 2     | DTBP (2.0)    | Cu <sub>2</sub> O (0.4) | N <sub>2</sub> | 110    | 24       | 51        |
| 3     | DTBP (2.0)    | CuCl (0.4)              | N <sub>2</sub> | 110    | 24       | trace.    |
| 4     | DTBP (2.0)    | CuCl <sub>2</sub> (0.4) | N <sub>2</sub> | 110    | 35       | 23        |
| 5     | DTBP (2.0)    | CuSO <sub>4</sub> (0.4) | N <sub>2</sub> | 110    | 30       | n.d.      |
| 6     | DTBP (2.0)    | CuI (0.4)               | N <sub>2</sub> | 110    | 36       | 56        |
| 7     | DTBP (2.0)    | Cu <sub>2</sub> O (0.4) | N <sub>2</sub> | 110    | 38       | 51        |
| 8     | DTBP (2.0)    | Cu <sub>2</sub> O (1.0) | N <sub>2</sub> | 110    | 30       | 61        |
| 9     | CHP (2.0)     | Cu <sub>2</sub> O (1.0) | N <sub>2</sub> | 110    | 30       | 58        |
| 10    | TBHP (2.0)    | Cu <sub>2</sub> O (1.0) | N <sub>2</sub> | 110    | 28       | 53        |
| 11    | DCP (2.0)     | Cu <sub>2</sub> O (1.0) | N <sub>2</sub> | 110    | 26       | 47        |
| 12    | BPO (2.0)     | Cu <sub>2</sub> O (1.0) | N <sub>2</sub> | 110    | 27       | trace.    |
| 13    | TBPP (2.0)    | Cu <sub>2</sub> O (1.0) | N <sub>2</sub> | 110    | 29       | trace.    |
| 14    | DTBP (2.0)    | Cu <sub>2</sub> O (1.0) | O <sub>2</sub> | 110    | 36       | trace.    |
| 15    | DTBP (2.0)    | Cu <sub>2</sub> O (1.0) | Air            | 110    | 34       | trace.    |
| 16    | DTBP (2.0)    | Cu <sub>2</sub> O (1.0) | N <sub>2</sub> | 100    | 36       | 47        |
| 17    | DTBP (2.0)    | Cu <sub>2</sub> O (1.0) | N <sub>2</sub> | 120    | 9        | 51        |
| 18    | DTBP (2.0)    | \                       | N <sub>2</sub> | 120    | 6        | 58        |
| 19    | DTBP (2.0)    | H <sub>2</sub> O        | N <sub>2</sub> | 120    | 7        | 68        |
| 20    | DTBP (1.0)    | H <sub>2</sub> O        | N <sub>2</sub> | 120    | 7        | 35        |
| 21    | DTBP (3.0)    | H <sub>2</sub> O        | N <sub>2</sub> | 120    | 7        | 64        |
| 22    | DTBP (5.0)    | H <sub>2</sub> O        | N <sub>2</sub> | 120    | 7        | 62        |

<sup>a</sup>Reaction conditions: **7a** (0.2 mmol), catalyst in 3 mL of THF. <sup>b</sup>Isolated yield. <sup>c</sup>Determined by <sup>1</sup>H NMR of the crude product E/Z>99/1;

### 3. General procedure.

#### 3.1 Synthesis of thiionized 5-alkylidene 3-pyrrolin-2-ones 4.

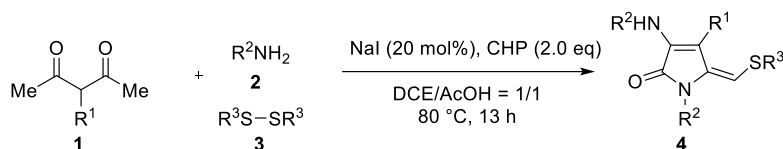

2,4-Pentanediones **1** (0.3 mmol), primary amines **2** (0.75 mmol), disulfides **3** (0.2 mmol), NaI (20 mol%), CHP (2.0 eq.) and DCE/acetic acid (3.0 mL, v/v = 1/1) were charged into a 10 mL Ace Glass tubes, and the mixture was stirred at 80°C for 13.0 h until 2,4-pentanediones were completely consumed. EtOAc (15 mL  $\times$  2) were added. The organic phase was washed with water (10 mL), dried over  $Na_2SO_4$ , concentrated and purified by flash column chromatography to afford 5-sulfydryl-3-pyrrolin-2-ones **4**.

#### 3.2 Synthesis of selenolized 5-alkylidene 3-pyrrolin-2-ones 6.

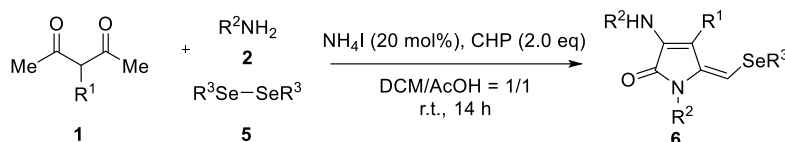

2,4-Pentanediones **1** (0.1 mmol), primary amines **2** (0.25 mmol), diselenides **5** (0.06 mmol),  $NH_4I$  (20 mol%), CHP (2.0 eq.) and DCM/acetic acid (2.0 mL, v/v = 1/1) were charged into a 10 mL Ace Glass tubes, and the mixture was stirred at r.t. for 14.0 h until 2,4-pentanediones were completely consumed. EtOAc (15 mL  $\times$  2) were added. The organic phase was washed with water (10 mL), dried over  $Na_2SO_4$ , concentrated and purified by flash column chromatography to afford 5-selenyl-3-pyrroline-2-one **6**.

#### 3.3 Synthesis of 5-alkylidene 3-pyrrolin-2-ones 7.

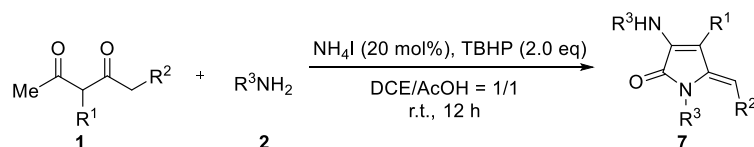

2,4-Pentanediones **1** (0.2 mmol), primary amines **2** (0.5 mmol),  $NH_4I$  (20 mol%), TBHP (2.0 eq.) and DCE/acetic acid (4.0 mL, v/v = 1/1) were charged into a 10 mL Ace Glass tubes, and the mixture was stirred at r.t. for 12.0 h until 2,4-pentanediones were completely consumed. EtOAc (15 mL  $\times$  2) were added. The organic phase was washed with water (10 mL), dried over  $Na_2SO_4$ , concentrated and purified by flash column chromatography to afford 3-pyrrolin-2-ones **7**.

#### 3.4 Synthesis of alkylated 5-alkylidene 3-pyrrolin-2-ones 8.

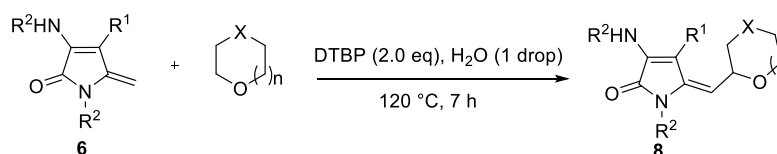

3-Pyrrolin-2-ones **6** (0.2 mmol), DTBP (2.0 eq.), H<sub>2</sub>O (1 drop) and ether (3mL) were charged into a 10 mL Ace Glass tubes, and the mixture was stirred at 120 °C for 7.0 h until 3-pyrrolin-2-ones were completely consumed. EtOAc (15 mL  $\times$  2) were added. The organic phase was washed with

water (10 mL), dried over Na<sub>2</sub>SO<sub>4</sub>, concentrated and purified by flash column chromatography to afford 5-etheryl-3-pyrrolin-2-ones **8**.

### 3.5 <sup>18</sup>O labeling reaction.

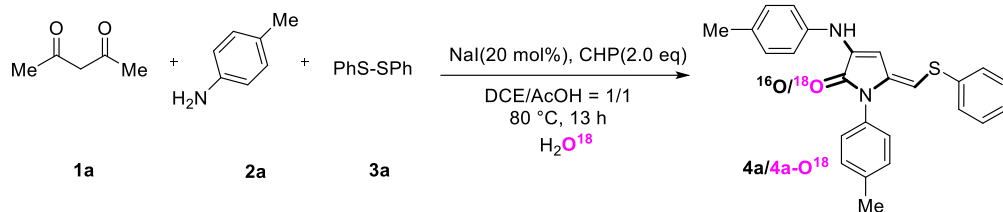

Acetylacetone **1** (0.3 mmol), primary amines **2a** (0.75 mmol), disulfide **3a** (0.2 mmol), NaI (20 mol%), CHP (2.0 eq.) and DCE/acetic acid (3.0 mL, v/v = 1/1), and H<sub>2</sub>O<sup>18</sup> (0.5 mL) were charged into a 10 mL Ace Glass tubes, and the mixture was stirred at 80°C for 13.0 h until acetylacetone were completely consumed. EtOAc (15 mL × 2) were added. The organic phase was washed with water (10 mL), dried over Na<sub>2</sub>SO<sub>4</sub>, concentrated and purified by flash column chromatography to afford 5-alkylidene-3-pyrrolin-2-ones **4a/4a-O<sup>18</sup>**.

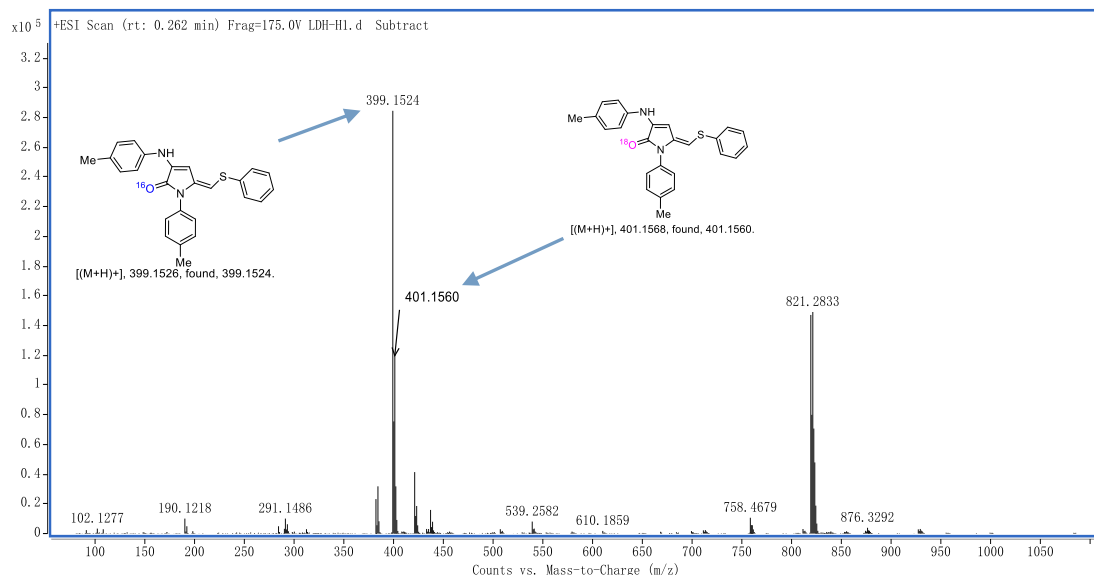

### 3.6 Competitive experiments.

Path a: Acetylacetone **1a** (0.6 mmol), aniline **2e** (0.75 mmol), 4-chlorofenamide **2g** (0.75 mmol), disulfide **3a** (0.4 mmol), NaI (20 mol%), CHP (2.0 eq.) and DCE/acetic acid (6.0 mL, v/v = 1/1) were charged into a 20 mL Ace Glass tubes, and the mixture was stirred at 80°C for 13.0 h until acetylacetone were completely consumed. EtOAc (15 mL × 2) were added. The organic phase was washed with water (10 mL), dried over Na<sub>2</sub>SO<sub>4</sub>, concentrated and purified by flash column chromatography to afford 5-alkylidene-3-pyrrolin-2-ones **4e**, **4g**, and a mixture of **4b'** and **4c'**.

Path b: β-Enaminone **9b** (0.6 mmol), aniline **2e** (0.75 mmol), disulfide **3a** (0.4 mmol), NaI (20 mol%), CHP (2.0 eq.) and DCE/acetic acid (6.0 mL, v/v = 1/1) were charged into a 20 mL Ace Glass tubes, and the mixture was stirred at 80°C for 13.0 h until acetylacetone were completely consumed. EtOAc (15 mL × 2) were added. The organic phase was washed with water (10 mL), dried over Na<sub>2</sub>SO<sub>4</sub>, concentrated and purified by flash column chromatography to afford 5-alkylidene-3-pyrrolin-2-ones **4e**, **4g**, and a mixture of **4b'** and **4c'**.



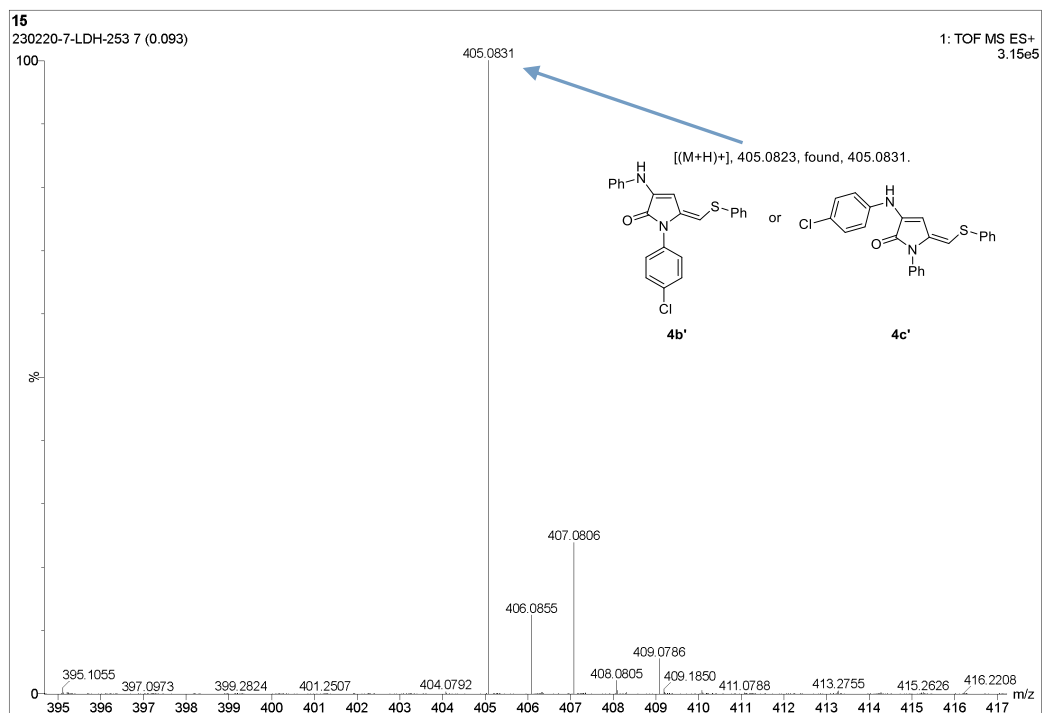

H RMS spectra of the mixture of **4b'** and **4c'**.



#### 4. Spectroscopic data.

**(E)-5-((Phenylthio)methylene)-1-(p-tolyl)-3-(p-tolylamino)-1,5-dihydro-2H-pyrrol-2-one (4a).**

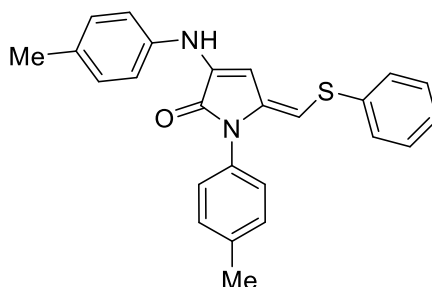

$V_{\text{Petroleum ether}}/V_{\text{Ethyl acetate}} = 10:1$ ,  $R_f = 0.2$ ; Yellow solid: 78 mg (66%), mp = 191–192 °C;  $^1\text{H NMR}$  (600 MHz,  $\text{CDCl}_3$ ):  $\delta = 7.30$  (d,  $J = 8.2$  Hz, 2H, ArH), 7.28–7.27 (m, 4H, ArH), 7.24 (d,  $J = 8.2$  Hz, 2H, ArH), 7.17 (d,  $J = 8.1$  Hz, 3H, ArH), 7.08 (d,  $J = 8.3$  Hz, 2H, ArH), 6.81 (s, 1H, NH), 6.62 (s, 1H, C=CH), 5.73 (s, 1H, C=CH), 2.40 (s, 3H, ArCH<sub>3</sub>), 2.33 (s, 3H, ArCH<sub>3</sub>);  $^{13}\text{C NMR}$  (150 MHz,  $\text{CDCl}_3$ ):  $\delta = 166.1, 144.9, 138.3, 137.7, 136.7, 133.5, 131.9, 130.9, 130.1, 130.1, 130.0, 130.0, 129.0, 129.0, 127.8, 127.8, 127.7, 127.7, 126.1, 117.5, 117.5, 99.9, 94.4, 21.2, 20.8$ ; **HRMS** (TOF ES+): m/z calcd for  $\text{C}_{25}\text{H}_{23}\text{N}_2\text{SO}$ : [(M+H)<sup>+</sup>], 399.1526, found, 399.1530.

**(E)-1-(3,4-Dimethylphenyl)-3-((3,4-dimethylphenyl)amino)-5-((phenylthio)methylene)-1,5-dihydro-2H-pyrrol-2-one (4b).**

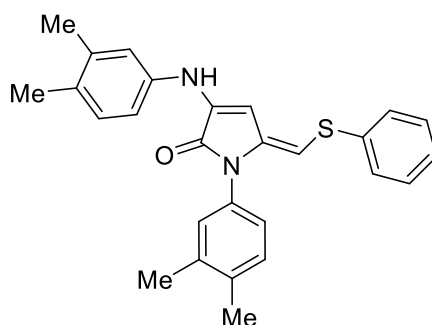

$V_{\text{Petroleum ether}}/V_{\text{Ethyl acetate}} = 10:1$ ,  $R_f = 0.2$ ; Yellow solid: 85 mg (67%), mp = 190–191 °C;  $^1\text{H NMR}$  (600 MHz,  $\text{CDCl}_3$ ):  $\delta = 7.28$  (d,  $J = 8.0$  Hz, 2H, ArH), 7.25–7.22 (m, 3H, ArH), 7.17 (s, 1H, ArH), 7.11 (d,  $J = 8.5$ , 2H, ArH), 7.08 (s, 1H, ArH), 6.95 (d,  $J = 7.4$ , 2H, ArH), 6.78 (s, 1H, NH), 6.60 (s, 1H, C=CH), 5.71 (s, 1H, C=CH), 7.29 (s, 3H, ArCH<sub>3</sub>), 2.38 (s, 3H, ArCH<sub>3</sub>), 2.37 (s, 3H, ArCH<sub>3</sub>), 2.33 (s, 3H, ArCH<sub>3</sub>);  $^{13}\text{C NMR}$  (150 MHz,  $\text{CDCl}_3$ ):  $\delta = 166.2, 145.2, 138.1, 138.0, 137.9, 137.2, 136.9, 133.7, 131.2, 130.8, 130.6, 130.5, 129.1, 129.1, 129.1, 127.7, 127.7, 126.1, 125.4, 119.1, 114.9, 99.8, 94.3, 20.1, 19.9, 19.6, 19.2$ ; **HRMS** (TOF ES+): m/z calcd for  $\text{C}_{27}\text{H}_{27}\text{N}_2\text{SO}$ : [(M+H)<sup>+</sup>], 427.1839, found, 427.1843.

**(E)-5-((Phenylthio)methylene)-1-(o-tolyl)-3-(o-tolylamino)-1,5-dihydro-2H-pyrrol-2-one (4c).**

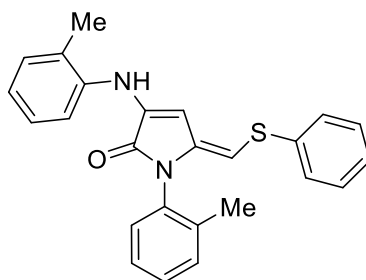

$V_{\text{Petroleum ether}}/V_{\text{Ethyl acetate}} = 10:1$ ,  $R_f = 0.2$ ; Yellow solid: 70 mg (59%), mp = 123–125 °C;  $^1\text{H NMR}$  (600 MHz,  $\text{CDCl}_3$ ):  $\delta = 7.40$  (d,  $J = 7.8$  Hz, 1H, ArH), 7.35 (d,  $J = 3.9$  Hz, 2H, ArH), 7.33 – 7.30 (m, 2H, ArH), 7.29 (d,  $J = 7.4$ , 2H, ArH), 7.23 (m, 4H, ArH), 7.17 (s, 1H, ArH), 6.99 (d,  $J = 7.3$  Hz, 1H, ArH), 6.66 (s, 1H, NH), 6.63 (s, 1H, C=CH), 5.47 (s, 1H, C=CH), 2.35 (s, 3H, ArCH<sub>3</sub>), 2.23 (s,  $J = 2.3$  Hz, 3H, ArCH<sub>3</sub>);  $^{13}\text{C NMR}$  (150 MHz,  $\text{CDCl}_3$ ):  $\delta = 163.9$ , 142.6, 136.3, 135.4, 134.7, 131.8, 130.5, 129.2, 128.9, 127.3, 127.1, 127.1, 125.7, 125.7, 125.7, 125.2, 125.0, 124.9, 124.2, 120.6, 114.9, 98.2, 92.8, 15.8, 15.6; **HRMS** (TOF ES+): m/z calcd for  $\text{C}_{25}\text{H}_{23}\text{N}_2\text{SO}$ :  $[(\text{M}+\text{H})^+]$ , 399.1526, found, 399.1525.

**(E)-1-(4-Methoxyphenyl)-3-((4-methoxyphenyl)amino)-5-((phenylthio)methylene)-1,5-dihydro-2H-pyrrol-2-one (4d).**

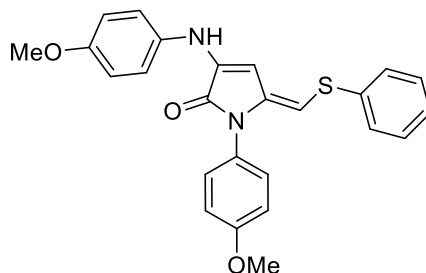

$V_{\text{Petroleum ether}}/V_{\text{Ethyl acetate}} = 8:1$ ,  $R_f = 0.2$ ; Yellow solid: 62 mg (48%), mp = 212–213 °C;  $^1\text{H NMR}$  (600 MHz,  $\text{CDCl}_3$ ):  $\delta = 7.28$  (d,  $J = 8.4$  Hz, 2H, ArH), 7.27–7.25 (m, 4H, ArH), 7.17 (t,  $J = 6.6$  Hz, 1H, ArH), 7.13 (d,  $J = 8.8$  Hz, 2H, ArH), 7.00 (d,  $J = 8.6$  Hz, 2H, ArH), 6.91 (d,  $J = 8.6$  Hz, 2H, ArH), 6.79 (s, 1H, NH), 6.54 (s, 1H, C=CH), 5.67 (s, 1H, C=CH), 3.84 (s, 3H, ArOMe), 3.81 (s, 3H, ArOMe);  $^{13}\text{C NMR}$  (150 MHz,  $\text{CDCl}_3$ ):  $\delta = 166.3$ , 159.4, 155.2, 145.4, 136.9, 134.2, 133.6, 129.4, 129.4, 129.1, 129.1, 127.7, 127.7, 126.3, 126.1, 119.3, 119.3, 114.8, 114.8, 114.8, 114.8, 99.5, 93.4, 55.6, 55.6; **HRMS** (TOF ES+): m/z calcd for  $\text{C}_{25}\text{H}_{23}\text{N}_2\text{SO}$ :  $[(\text{M}+\text{H})^+]$ , 431.1424, found, 431.1412.

**(E)-1-Phenyl-3-(phenylamino)-5-((phenylthio)methylene)-1,5-dihydro-2H-pyrrol-2-one (4e).**

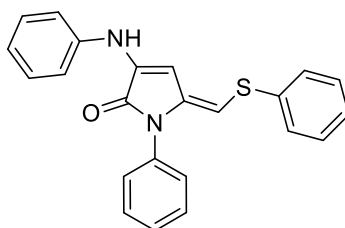

$V_{\text{Petroleum ether}}/V_{\text{Ethyl acetate}} = 10:1$ ,  $R_f = 0.2$ ; Yellow solid: 77 mg (70%), mp = 172–173 °C;  $^1\text{H NMR}$  (600 MHz,  $\text{DMSO}-d_6$ ):  $\delta = 8.98$  (s, 1H, NH), 7.57 (d,  $J = 7.7$  Hz, 2H, ArH), 7.46 (t,  $J = 6.4$  Hz, 3H, ArH), 7.39 (d,  $J = 7.9$  Hz, 2H, ArH), 7.36 (d,  $J = 7.4$  Hz, 2H, ArH), 7.32 (d,  $J = 7.5$  Hz, 2H,

ArH), 7.29–7.27 (m, 2H, ArH), 7.20 (t,  $J = 7.3$  Hz, 1H, ArH), 6.99 (t,  $J = 7.2$  Hz, 1H, ArH), 6.64 (s, 1H, C=CH), 5.55 (s, 1H, C=CH);  $^{13}\text{C}$  NMR (150 MHz, DMSO- $d_6$ ):  $\delta = 165.6, 145.5, 141.4, 136.9, 134.9, 134.1, 129.9, 129.9, 129.9, 129.9, 129.7, 129.7, 128.8, 128.7, 128.8, 127.4, 127.4, 126.6, 122.4, 118.6, 118.6, 97.6, 94.6$ ; HRMS (TOF ES+):  $m/z$  calcd for  $\text{C}_{23}\text{H}_{19}\text{N}_2\text{SO}$ :  $[(\text{M}+\text{H})^+]$ , 371.1213, found, 371.1219.

**(E)-1-(3-Chlorophenyl)-3-((3-chlorophenyl)amino)-5-((phenylthio)methylene)-1,5-dihydro-2-H-pyrrol-2-one (4f).**

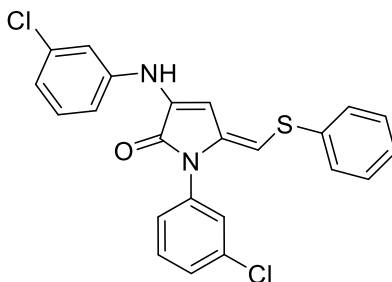

$V_{\text{Petroleum ether}}/V_{\text{Ethyl acetate}} = 10:1$ ,  $R_f = 0.2$ ; Yellow solid: 76 mg (63%), mp = 167–168 °C;  $^1\text{H}$  NMR (600 MHz, DMSO- $d_6$ ):  $\delta = 9.20$  (s, 1H, NH), 7.61 (d,  $J = 5.8$  Hz, 1H, ArH), 7.59 (d,  $J = 7.8$  Hz, 1H, ArH), 7.55 (d,  $J = 7.8$  Hz, 1H, ArH), 7.46 (d,  $J = 7.4$  Hz, 1H, ArH), 7.44 (s, 1H, ArH), 7.38 (d,  $J = 6.8$  Hz, 2H, ArH), 7.35 (s, 1H, ArH), 7.32 (t,  $J = 6.7$  Hz, 3H, ArH), 7.23 (t,  $J = 6.7$  Hz, 1H, ArH), 7.04 (d,  $J = 6.4$  Hz, 1H, ArH), 6.71 (s, 1H, C=CH), 5.70 (s, 1H, C=CH);  $^{13}\text{C}$  NMR (150 MHz, DMSO- $d_6$ ):  $\delta = 165.3, 144.3, 142.9, 136.5, 135.4, 134.1, 134.0, 133.9, 131.5, 131.5, 129.8, 129.8, 128.9, 128.8, 127.7, 127.7, 127.6, 126.7, 121.9, 118.3, 116.5, 99.3, 96.6$ ; HRMS (TOF ES+):  $m/z$  calcd for  $\text{C}_{23}\text{H}_{17}\text{Cl}_2\text{N}_2\text{SO}$ :  $[(\text{M}+\text{H})^+]$ , 439.0433, found, 439.0438.

**(E)-1-(4-Chlorophenyl)-3-((4-chlorophenyl)amino)-5-((phenylthio)methylene)-1,5-dihydro-2-H-pyrrol-2-one (4g).**

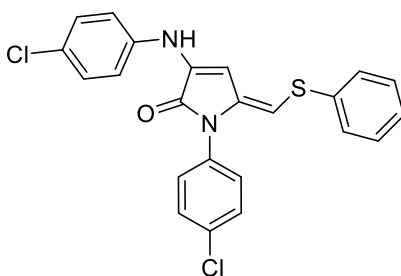

$V_{\text{Petroleum ether}}/V_{\text{Ethyl acetate}} = 10:1$ ,  $R_f = 0.2$ ; Yellow solid: 85mg (62%), mp = 213–214 °C;  $^1\text{H}$  NMR (600 MHz,  $\text{CDCl}_3$ ):  $\delta = 7.48$  (d,  $J = 8.3$  Hz, 2H, ArH), 7.31 (d,  $J = 3.1$  Hz, 2H, ArH), 7.30–7.29 (m, 3H, ArH), 7.28 (d,  $J = 7.3$  Hz, 3H, ArH), 7.22 (t,  $J = 7.1$  Hz, 1H, ArH), 7.09 (d,  $J = 8.4$  Hz, 2H, ArH), 6.99 (s, 1H, NH), 6.66 (s, 1H, C=CH), 5.80 (s, 1H, C=CH);  $^{13}\text{C}$  NMR (150 MHz,  $\text{CDCl}_3$ ):  $\delta = 165.7, 143.2, 138.8, 136.0, 134.3, 132.9, 132.1, 129.8, 129.8, 129.6, 129.6, 129.3, 129.3, 129.3, 129.3, 128.1, 128.1, 127.3, 126.6, 118.7, 118.7, 102.0, 95.9$ ; HRMS (TOF ES+):  $m/z$  calcd for  $\text{C}_{23}\text{H}_{16}\text{Cl}_2\text{N}_2\text{SONa}$ :  $[(\text{M}+\text{Na})^+]$ , 461.0253, found, 461.0256.

**(E)-1-(3-Bromophenyl)-3-((3-bromophenyl)amino)-5-((phenylthio)methylene)-1,5-dihydro-2-H-pyrrol-2-one (4h).**

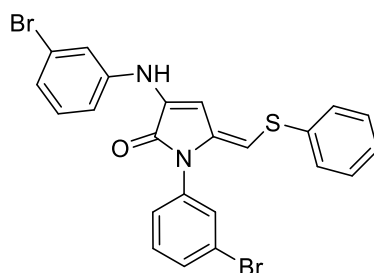

$V_{\text{Petroleum ether}}/V_{\text{Ethyl acetate}} = 10:1$ ,  $R_f = 0.2$ ; Yellow solid: 108 mg (69%), mp = 171–172 °C;  $^1\text{H NMR}$  (600 MHz,  $\text{CDCl}_3$ ):  $\delta = 7.56\text{--}7.55$  (m, 2H, ArH), 7.38 (t,  $J = 8.2$  Hz, 2H, ArH), 7.33 (s, 1H, ArH), 7.31 (s, 1H, ArH), 7.31–7.30 (m, 3H, ArH+NH), 7.23–7.21 (m, 2H, ArH), 7.16 (d,  $J = 7.5$  Hz, 1H, ArH), 7.10 (d,  $J = 7.0$  Hz, 1H, ArH), 7.00–6.97 (m, 1H, ArH), 6.70 (s, 1H, C=CH), 5.84 (s, 1H, C=CH);  $^{13}\text{C NMR}$  (150 MHz,  $\text{CDCl}_3$ ):  $\delta = 165.5, 142.8, 141.5, 135.9, 134.8, 132.5, 131.6, 131.2, 130.9, 130.8, 129.3, 129.3, 128.2, 128.2, 126.7, 126.7, 125.4, 123.3, 122.9, 120.3, 116.0, 102.7, 96.6$ ; **HRMS** (TOF ES+):  $m/z$  calcd for  $\text{C}_{23}\text{H}_{17}\text{Br}_2\text{N}_2\text{SO}$ :  $[(\text{M}+\text{H})^+]$ , 526.9423, found, 526.9427.

**(E)-5-((Phenylthio)methylene)-1-(4-(trifluoromethyl)phenyl)-3-((4-(trifluoromethyl)phenyl)amino)-1,5-dihydro-2H-pyrrol-2-one (4i).**

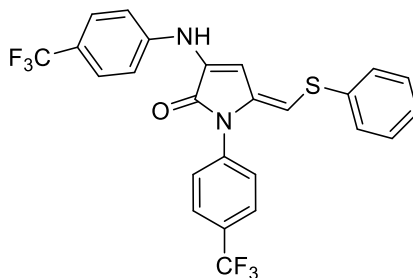

$V_{\text{Petroleum ether}}/V_{\text{Ethyl acetate}} = 10:1$ ,  $R_f = 0.2$ ; Yellow solid: 109 mg (72%),  $E/Z = 20/1$ , mp = 239–240 °C; **Major:**  $^1\text{H NMR}$  (600 MHz,  $\text{CDCl}_3$ ):  $\delta = 7.79$  (d,  $J = 8.2$  Hz, 2H, ArH), 7.59 (d,  $J = 8.3$  Hz, 2H, ArH), 7.53 (d,  $J = 8.4$  Hz, 2H, ArH), 7.34–7.30 (m, 4H, ArH), 7.24 (d,  $J = 8.0$  Hz, 3H, ArH), 7.18 (s, 1H, NH), 6.83 (s, 1H, C=CH), 5.92 (s, 1H, C=CH);  $^{13}\text{C NMR}$  (150 MHz,  $\text{CDCl}_3$ ):  $\delta = 165.5, 143.1, 141.9, 136.8, 135.6, 132.2, 130.4$  ( $J = 33.1$  Hz), 129.6 (minor), 129.4 (minor), 129.3, 129.3, 129.2 (minor), 128.5, 128.5, 128.2, 128.2, 127.7 (minor), 126.9, 126.9, 126.9, 126.8, 126.8, 126.8, 124.2 (d,  $J = 270.0$  Hz), 124.1 (d,  $J = 33.1$  Hz), 123.7 (d,  $J = 270.0$  Hz), 119.8 (minor), 116.9, 116.9, 108.8 (minor), 103.8, 97.7; **HRMS** (TOF ES+):  $m/z$  calcd for  $\text{C}_{25}\text{H}_{17}\text{F}_6\text{N}_2\text{SO}$ :  $[(\text{M}+\text{H})^+]$ , 507.0960, found, 507.0958.

**(E)-1-Benzyl-3-(benzylamino)-5-((phenylthio)methylene)-1,5-dihydro-2H-pyrrol-2-one (4j).**

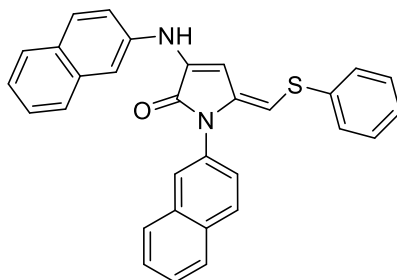

$V_{\text{Petroleum ether}}/V_{\text{Ethyl acetate}} = 7:1$ ,  $R_f = 0.2$ ; Yellow solid: 49 mg (35%), mp = 192–193 °C;  $^1\text{H NMR}$

(600 MHz, CDCl<sub>3</sub>):  $\delta$  = 7.98 (d,  $J$  = 8.6 Hz, 1H, ArH), 7.92–7.88 (m, 3H, ArH), 7.81 (d,  $J$  = 8.1 Hz, 1H, ArH), 7.78 (dd,  $J$  = 8.2, 4.0 Hz, 3H, ArH), 7.59 (s, 1H, ArH), 7.56–7.54 (m, 3H, ArH), 7.49–7.46 (m, 2H, ArH), 7.40–7.37 (m, 2H, ArH), 7.31–7.28 (m, 2H, ArH), 7.19–7.17 (m, 1H, ArH), 7.15 (s, 1H, NH), 6.90 (s, 1H, C=CH), 5.88 (s, 1H, C=CH); <sup>13</sup>C NMR (150 MHz, CDCl<sub>3</sub>):  $\delta$  = 166.2, 144.2, 137.8, 136.4, 134.3, 133.5, 133.0, 132.8, 131.1, 129.6, 129.6, 129.2, 129.2, 128.1, 127.9, 127.9, 127.9, 127.8, 127.1, 127.1, 126.9, 126.9, 126.9, 126.8, 126.4, 125.6, 124.5, 119.2, 112.3, 101.6, 95.9; **HRMS** (TOF ES<sup>+</sup>):  $m/z$  calcd for C<sub>31</sub>H<sub>23</sub>N<sub>2</sub>SO: [(M+H)<sup>+</sup>], 471.1526, found, 471.1528.

**(E)-1-Benzyl-3-(benzylamino)-5-((phenylthio)methylene)-1,5-dihydro-2H-pyrrol-2-one (4k).**

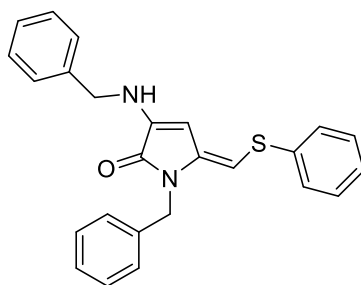

V<sub>Petroleum ether</sub>/V<sub>Ethyl acetate</sub> = 9:1, R<sub>f</sub> = 0.2; Yellow solid: 44 mg (37%), mp = 213–214 °C; <sup>1</sup>H NMR (600 MHz, CDCl<sub>3</sub>):  $\delta$  = 7.37 (d,  $J$  = 7.3 Hz, 1H, ArH), 7.34 (t,  $J$  = 7.2 Hz, 5H, ArH), 7.31–7.28 (m, 2H, ArH), 7.22 (d,  $J$  = 7.5 Hz, 2H, ArH), 7.17 (d,  $J$  = 7.4 Hz, 2H, ArH), 7.11–7.09 (m, 1H, ArH), 6.97 (dd,  $J$  = 7.6, 1.8 Hz, 2H, ArH), 5.81 (s, 1H, C=CH), 5.59 (s, 1H, C=CH), 5.00 (t,  $J$  = 5.9 Hz, 1H, NH), 4.91 (s, 2H, CH<sub>2</sub>), 4.32 (d,  $J$  = 5.7 Hz, 2H, CH<sub>2</sub>); <sup>13</sup>C NMR (150 MHz, CDCl<sub>3</sub>):  $\delta$  = 166.2, 144.5, 140.2, 137.5, 137.3, 137.1, 128.9, 128.9, 128.8, 128.8, 128.8, 127.8, 127.7, 127.7, 127.5, 126.9, 126.9, 126.8, 126.8, 125.6, 96.9, 91.6, 48.5, 43.3; **HRMS** (TOF ES<sup>+</sup>):  $m/z$  calcd for C<sub>25</sub>H<sub>23</sub>N<sub>2</sub>SO: [(M+H)<sup>+</sup>], 399.1526, found, 399.1511.

**(E)-1-(4-Chlorobenzyl)-3-((4-chlorobenzyl)amino)-5-((phenylthio)methylene)-1,5-dihydro-2H-pyrrol-2-one (4l).**

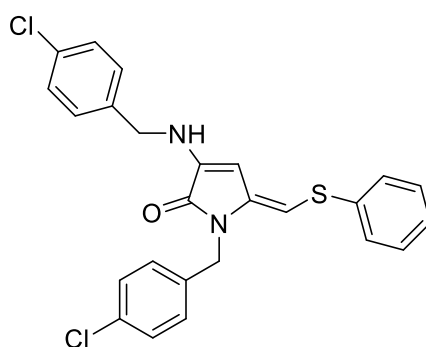

V<sub>Petroleum ether</sub>/V<sub>Ethyl acetate</sub> = 7:1, R<sub>f</sub> = 0.2; Light yellow solid: 35 mg (25%), mp = 135–136 °C; <sup>1</sup>H NMR (600 MHz, CDCl<sub>3</sub>):  $\delta$  = 7.32 (t,  $J$  = 8.7 Hz, 4H, ArH), 7.26 (d,  $J$  = 3.9 Hz, 2H, ArH), 7.20 (t,  $J$  = 7.6 Hz, 2H, ArH), 7.15 (d,  $J$  = 8.0 Hz, 2H, ArH), 7.13 (t,  $J$  = 8.0 Hz, 1H, ArH), 6.98 (d,  $J$  = 7.7 Hz, 2H, ArH), 5.77 (s, 1H, C=CH), 5.56 (s, 1H, C=CH), 5.02 (t,  $J$  = 5.9 Hz, 1H, NH), 4.87 (s, 2H, CH<sub>2</sub>), 4.30 (d,  $J$  = 5.9 Hz, 2H, CH<sub>2</sub>); <sup>13</sup>C NMR (150 MHz, CDCl<sub>3</sub>):  $\delta$  = 166.0, 143.7, 139.9, 137.1, 135.7, 135.5, 133.5, 133.3, 128.9, 128.9, 128.9, 128.9, 128.9, 128.9, 128.9, 128.4, 128.4, 126.9, 126.9, 125.8, 125.8, 97.6, 92.0, 47.7, 42.6; **HRMS** (TOF ES<sup>+</sup>):  $m/z$  calcd for C<sub>25</sub>H<sub>21</sub>Cl<sub>2</sub>N<sub>2</sub>SO:

$[(M+H)^+]$ , 467.0746, found, 467.0751.

**(E)-5-(((4-Bromophenyl)thio)methylene)-1-(p-tolyl)-3-(p-tolylamino)-1,5-dihydro-2H-pyrrol-2-one (4m).**

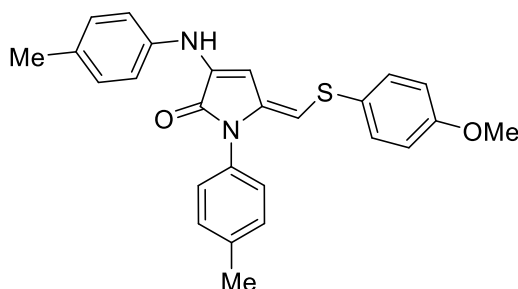

$V_{\text{Petroleum ether}}/V_{\text{Ethyl acetate}} = 7:1$ ,  $R_f = 0.2$ ; Yellow solid: 74 mg (58%), mp = 165–167 °C;  $^1\text{H NMR}$  (600 MHz,  $\text{CDCl}_3$ ):  $\delta = 7.28\text{--}7.25$  (m, 4H, ArH), 7.21 (d,  $J = 8.1$  Hz, 2H, ArH), 7.17 (d,  $J = 8.0$  Hz, 2H, ArH), 7.08 (d,  $J = 8.3$  Hz, 2H, ArH), 6.84 (d,  $J = 8.8$  Hz, 2H, ArH), 6.80 (s, 1H, NH), 6.63 (s, 1H, C=CH), 5.69 (s, 1H, C=CH), 3.78 (s, 3H, ArOMe), 2.38 (s, 3H, ArCH<sub>3</sub>), 2.33 (s, 3H, ArCH<sub>3</sub>);  $^{13}\text{C NMR}$  (150 MHz,  $\text{CDCl}_3$ ):  $\delta = 166.1, 158.9, 142.9, 138.3, 137.9, 133.3, 131.9, 131.1, 131.1, 131.0, 130.1, 130.1, 130.1, 130.1, 127.9, 127.9, 126.6, 117.5, 117.5, 114.8, 114.8, 102.9, 94.6, 55.4, 21.2, 20.8$ ; **HRMS** (TOF ES<sup>+</sup>): m/z calcd for  $\text{C}_{26}\text{H}_{25}\text{N}_2\text{SO}_2$ :  $[(M+H)^+]$ , 429.1631, found, 429.1639.

**(E)-1-(p-Tolyl)-3-(p-tolylamino)-5-((p-tolylthio)methylene)-1,5-dihydro-2H-pyrrol-2-one (4n).**

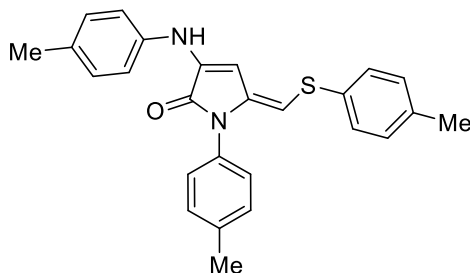

$V_{\text{Petroleum ether}}/V_{\text{Ethyl acetate}} = 10:1$ ,  $R_f = 0.2$ ; Yellow solid: 84 mg (68%), mp = 202–203 °C;  $^1\text{H NMR}$  (600 MHz,  $\text{DMSO-}d_6$ ):  $\delta = 8.84$  (s, 1H, NH), 7.33 (d,  $J = 7.9$  Hz, 2H, ArH), 7.29–7.25 (m, 4H, ArH), 7.17 (t,  $J = 6.9$  Hz, 3H, ArH), 7.14 (d,  $J = 8.1$  Hz, 3H, ArH), 6.52 (s, 1H, C=CH), 5.45 (s, 1H, C=CH), 2.35 (s, 3H, ArCH<sub>3</sub>), 2.25 (s, 3H, ArCH<sub>3</sub>), 2.24 (s, 3H, ArCH<sub>3</sub>);  $^{13}\text{C NMR}$  (150 MHz,  $\text{DMSO-}d_6$ ):  $\delta = 165.6, 144.9, 138.9, 138.3, 136.3, 135.0, 133.1, 131.5, 131.3, 130.5, 130.5, 130.4, 130.4, 130.1, 130.1, 128.5, 128.5, 128.0, 128.0, 118.7, 118.7, 98.2, 93.8, 21.2, 20.9, 20.9$ ; **HRMS** (TOF ES<sup>+</sup>): m/z calcd for  $\text{C}_{26}\text{H}_{25}\text{N}_2\text{SO}$ :  $[(M+H)^+]$ , 413.1693, found, 413.1685.

**(E)-5-(((4-Fluorophenyl)thio)methylene)-1-(p-tolyl)-3-(p-tolylamino)-1,5-dihydro-2H-pyrrol-2-one (4o).**

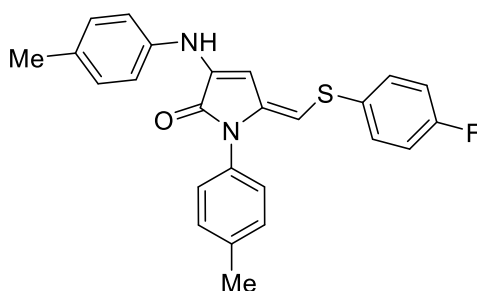

$V_{\text{Petroleum ether}}/V_{\text{Ethyl acetate}} = 10:1$ ,  $R_f = 0.2$ ; Yellow solid: 76 mg (61%), mp = 169–170 °C;  $^1\text{H NMR}$  (600 MHz,  $\text{CDCl}_3$ ):  $\delta = 7.29$  (d,  $J = 7.9$  Hz, 2H, ArH), 7.25 (d,  $J = 5.1$  Hz, 2H, ArH), 7.22 (d,  $J = 8.1$  Hz, 2H, ArH), 7.17 (d,  $J = 8.1$  Hz, 2H, ArH), 7.08 (d,  $J = 8.3$  Hz, 2H, ArH), 6.99 (t,  $J = 8.6$  Hz, 2H, ArH), 6.83 (s, 1H, NH), 6.61 (s, 1H, C=CH), 5.67 (s, 1H, C=CH), 2.40 (s, 3H, ArCH<sub>3</sub>), 2.33 (s, 3H, ArCH<sub>3</sub>);  $^{13}\text{C NMR}$  (150 MHz,  $\text{CDCl}_3$ ):  $\delta = 166.2$ , 161.7 (d,  $J = 246.5$  Hz), 144.8, 138.4, 137.7, 133.7, 132.1, 131.7 (d,  $J = 3.1$  Hz), 130.2 (d,  $J = 6.1$  Hz), 130.2 (d,  $J = 6.1$  Hz), 130.1, 130.1, 130.1, 130.1, 129.9, 127.9, 127.9, 117.6, 116.2 (d,  $J = 22.1$  Hz), 116.2 (d,  $J = 22.1$  Hz), 100.4, 94.3, 21.3, 20.8; **HRMS** (TOF ES<sup>+</sup>): m/z calcd for  $\text{C}_{25}\text{H}_{22}\text{FN}_2\text{SO}$ : [(M+H)<sup>+</sup>], 417.1431, found, 417.1439.

**(E)-5-(((4-Chlorophenyl)thio)methylene)-1-(p-tolyl)-3-(p-tolylamino)-1,5-dihydro-2H-pyrrol-2-one (4p).**

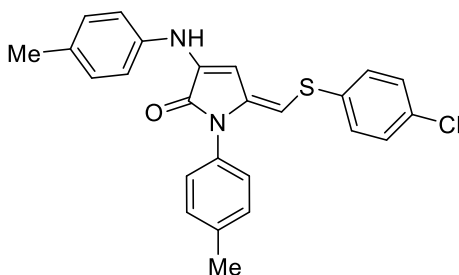

$V_{\text{Petroleum ether}}/V_{\text{Ethyl acetate}} = 8:1$ ,  $R_f = 0.2$ ; Light yellow solid: 84 mg (65%), mp = 181–182 °C;  $^1\text{H NMR}$  (600 MHz,  $\text{DMSO}-d_6$ ):  $\delta = 8.92$  (s, 1H, NH), 7.38 (d,  $J = 8.5$  Hz, 2H, ArH), 7.35 (d,  $J = 8.0$  Hz, 2H, ArH), 7.31 (d,  $J = 8.0$  Hz, 2H, ArH), 7.29–7.26 (m, 4H, ArH), 7.16 (d,  $J = 8.1$  Hz, 2H, ArH), 6.52 (s, 1H, C=CH), 5.47 (s, 1H, C=CH), 2.37 (s, 3H, ArCH<sub>3</sub>), 2.26 (s, 3H, ArCH<sub>3</sub>);  $^{13}\text{C NMR}$  (150 MHz,  $\text{DMSO}-d_6$ ):  $\delta = 165.8$ , 146.9, 138.8, 138.3, 136.4, 135.4, 131.5, 131.4, 131.0, 130.4, 130.4, 130.1, 130.1, 129.7, 129.7, 128.9, 128.9, 128.5, 128.5, 118.8, 118.8, 95.7, 93.6, 21.2, 20.9; **HRMS** (TOF ES<sup>+</sup>): m/z calcd for  $\text{C}_{25}\text{H}_{22}\text{ClN}_2\text{SO}$ : [(M+H)<sup>+</sup>], 433.1136, found, 433.1134.

**(E)-5-(((3-Chlorophenyl)thio)methylene)-1-(p-tolyl)-3-(p-tolylamino)-1,5-dihydro-2H-pyrrol-2-one (4q).**

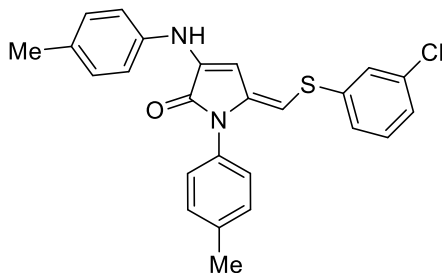

$V_{\text{Petroleum ether}}/V_{\text{Ethyl acetate}} = 8:1$ ,  $R_f = 0.2$ ; Light yellow solid: 84 mg (65%), mp = 181–182 °C;  $^1\text{H NMR}$

**NMR** (600 MHz, CDCl<sub>3</sub>):  $\delta$  = 7.31 (d,  $J$  = 8.1 Hz, 2H, ArH), 7.25 (d,  $J$  = 8.2 Hz, 2H, ArH), 7.22–7.19 (m, 2H, ArH), 7.18 (d,  $J$  = 7.9 Hz, 1H, ArH), 7.16 (s, 1H, ArH), 7.14–7.11 (m, 2H, ArH), 7.08 (d,  $J$  = 8.4 Hz, 2H, ArH), 6.84 (s, 1H, NH), 6.59 (s, 1H, C=CH), 5.65 (s, 1H, C=CH), 2.41 (s, 3H, ArCH<sub>3</sub>), 2.33 (s, 3H, ArCH<sub>3</sub>); **<sup>13</sup>C NMR** (150 MHz, CDCl<sub>3</sub>):  $\delta$  = 166.2, 146.6, 139.3, 138.6, 137.6, 134.9, 133.9, 132.2, 130.9, 130.2, 130.2, 130.1, 130.1, 130.1, 127.8, 127.8, 126.9, 126.1, 125.3, 117.7, 117.7, 97.8, 94.1, 21.3, 20.8; **HRMS** (TOF ES<sup>+</sup>):  $m/z$  calcd for C<sub>25</sub>H<sub>22</sub>ClN<sub>2</sub>SO: [(M+H)<sup>+</sup>], 433.1136, found, 433.1139.

**(E)-5-(((4-Bromophenyl)thio)methylene)-1-(p-tolyl)-3-(p-tolylamino)-1,5-dihydro-2H-pyrrol-2-one (4r).**

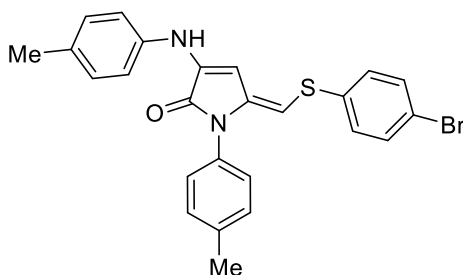

V<sub>Petroleum ether</sub>/V<sub>Ethyl acetate</sub> = 10:1, R<sub>f</sub> = 0.2; Yellow solid: 81 mg (57%), mp = 216–217 °C; **<sup>1</sup>H NMR** (600 MHz, CDCl<sub>3</sub>):  $\delta$  = 7.38 (d,  $J$  = 8.2 Hz, 2H, ArH), 7.30 (d,  $J$  = 7.9 Hz, 2H, ArH), 7.23 (d,  $J$  = 8.2 Hz, 2H, ArH), 7.16 (d,  $J$  = 8.0 Hz, 2H, ArH), 7.12 (d,  $J$  = 8.5 Hz, 2H, ArH), 7.07 (d,  $J$  = 8.1 Hz, 2H, ArH), 6.85 (s, 1H, NH), 6.58 (s, 1H, C=CH), 5.64 (s, 1H, C=CH), 2.40 (s, 3H, ArCH<sub>3</sub>), 2.33 (s, 3H, ArCH<sub>3</sub>); **<sup>13</sup>C NMR** (150 MHz, CDCl<sub>3</sub>):  $\delta$  = 166.2, 145.9, 138.5, 137.6, 136.2, 133.9, 132.2, 132.1, 132.1, 130.9, 130.2, 130.2, 130.1, 130.1, 129.1, 129.1, 127.9, 127.9, 119.9, 117.7, 117.7, 98.6, 94.2, 21.3, 20.8; **HRMS** (TOF ES<sup>+</sup>):  $m/z$  calcd for C<sub>25</sub>H<sub>22</sub>BrN<sub>2</sub>SO: [(M+H)<sup>+</sup>], 477.0631, found, 477.0637.

**(E)-5-(((4-Nitrophenyl)thio)methylene)-1-(p-tolyl)-3-(p-tolylamino)-1,5-dihydro-2H-pyrrol-2-one (4s).**

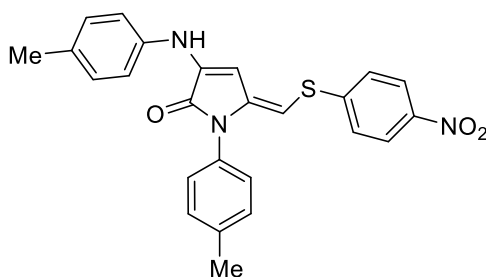

V<sub>Petroleum ether</sub>/V<sub>Ethyl acetate</sub> = 7:1, R<sub>f</sub> = 0.2; Yellow solid: 60 mg (43%), mp = 242–243 °C; **<sup>1</sup>H NMR** (600 MHz, DMSO-*d*<sub>6</sub>):  $\delta$  = 9.00 (s, 1H, NH), 8.14 (d,  $J$  = 8.5 Hz, 2H, ArH), 7.46 (d,  $J$  = 8.4 Hz, 2H, ArH), 7.38–7.34 (m, 4H, ArH), 7.25 (d,  $J$  = 8.0 Hz, 2H, ArH), 7.14 (d,  $J$  = 8.0 Hz, 2H, ArH), 6.48 (s, 1H, C=CH), 5.50 (s, 1H, C=CH), 2.38 (s, 3H, ArCH<sub>3</sub>), 2.24 (s, 3H, ArCH<sub>3</sub>); **<sup>13</sup>C NMR** (150 MHz, DMSO-*d*<sub>6</sub>):  $\delta$  = 165.9, 149.4, 148.0, 145.3, 138.5, 138.5, 135.9, 131.8, 131.2, 130.5, 130.5, 130.2, 130.2, 128.6, 128.6, 126.5, 126.5, 124.7, 124.7, 118.9, 118.9, 93.0, 92.3, 21.2, 20.9; **HRMS** (TOF ES<sup>+</sup>):  $m/z$  calcd for C<sub>25</sub>H<sub>21</sub>N<sub>3</sub>SO<sub>3</sub>Na: [(M+Na)<sup>+</sup>], 466.1196, found, 466.1193.

**(E)-5-((Benzylthio)methylene)-1-(p-tolyl)-3-(p-tolylamino)-1,5-dihydro-2H-pyrrol-2-one (4t).**



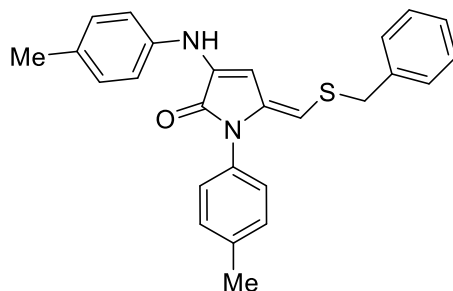

$V_{\text{Petroleum ether}}/V_{\text{Ethyl acetate}} = 10:1$ ,  $R_f = 0.2$ ; Yellow solid: 64 mg (52%), mp = 152–153 °C;  $^1\text{H NMR}$  (600 MHz,  $\text{CDCl}_3$ ):  $\delta = 7.29$  (t,  $J = 7.2$  Hz, 2H, ArH), 7.25 (d,  $J = 6.8$  Hz, 3H, ArH), 7.23 (d,  $J = 2.9$  Hz, 2H, ArH), 7.15 (d,  $J = 8.0$  Hz, 2H, ArH), 7.09 (d,  $J = 7.9$  Hz, 2H, ArH), 7.02 (d,  $J = 8.2$  Hz, 2H, ArH), 6.72 (s, 1H, NH), 6.41 (s, 1H, C=CH), 5.48 (s, 1H, C=CH), 3.84 (s, 2H,  $\text{CH}_2$ ), 2.41 (s, 3H, Ar $\text{CH}_3$ ), 2.33 (s, 3H, Ar $\text{CH}_3$ );  $^{13}\text{C NMR}$  (150 MHz,  $\text{CDCl}_3$ ):  $\delta = 165.9, 142.1, 138.1, 137.9, 137.5, 132.9, 131.7, 131.1, 130.0, 130.0, 129.9, 129.9, 128.9, 128.9, 128.6, 128.6, 127.8, 127.8, 127.3, 117.4, 117.4, 102.9, 94.8, 39.5, 21.3, 20.8$ ; **HRMS** (TOF ES $^+$ ): m/z calcd for  $\text{C}_{26}\text{H}_{25}\text{N}_2\text{SO}$ : [(M+H) $^+$ ], 413.1682, found, 413.1688.

**(E)-5-((Benzo[d]thiazol-2-ylthio)methylene)-1-(p-tolyl)-3-(p-tolylamino)-1,5-dihydro-2H-pyrrol-2-one (4u).**

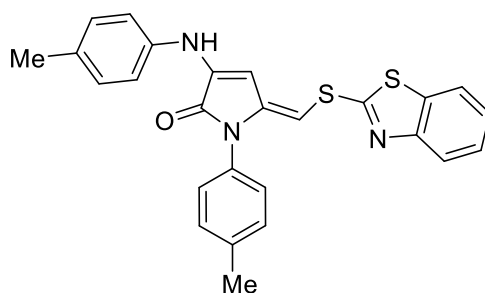

$V_{\text{Petroleum ether}}/V_{\text{Ethyl acetate}} = 10:1$ ,  $R_f = 0.2$ ; Yellow solid: 52 mg (38%), mp = 221–222 °C;  $^1\text{H NMR}$  (600 MHz,  $\text{DMSO-}d_6$ ):  $\delta = 9.14$  (s, 1H, NH), 8.00 (d,  $J = 5.8$  Hz, 1H, ArH), 7.83 (d,  $J = 7.6$  Hz, 1H, ArH), 7.46 (t,  $J = 7.0$  Hz, 1H, ArH), 7.42 (d,  $J = 5.9$  Hz, 2H, ArH), 7.36 (d,  $J = 7.5$  Hz, 3H, ArH), 7.31–7.28 (m, 2H, ArH), 7.15 (d,  $J = 5.8$  Hz, 2H, ArH), 6.57 (s, 1H, C=CH), 5.69 (s, 1H, C=CH), 2.41 (s, 3H, Ar $\text{CH}_3$ ), 2.25 (s, 3H, Ar $\text{CH}_3$ );  $^{13}\text{C NMR}$  (150 MHz,  $\text{DMSO-}d_6$ ):  $\delta = 170.3, 166.0, 154.3, 151.3, 138.7, 138.4, 136.4, 135.3, 132.0, 131.1, 130.6, 130.6, 130.2, 130.2, 128.5, 128.5, 126.9, 124.8, 122.3, 121.7, 119.2, 119.2, 92.7, 90.8, 21.3, 20.9$ ; **HRMS** (TOF ES $^+$ ): m/z calcd for  $\text{C}_{26}\text{H}_{22}\text{N}_3\text{S}_2\text{O}$ : [(M+H) $^+$ ], 456.1199, found, 456.1200.

**(E)-5-((Thiophen-2-ylthio)methylene)-1-(p-tolyl)-3-(p-tolylamino)-1,5-dihydro-2H-pyrrol-2-one (4v).**

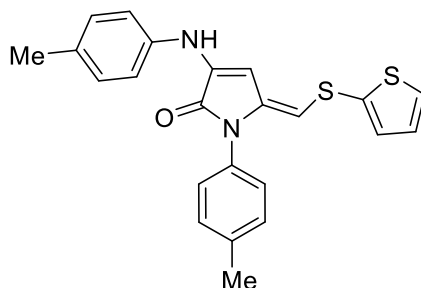

$V_{\text{Petroleum ether}}/V_{\text{Ethyl acetate}} = 10:1$ ,  $R_f = 0.2$ ; Yellow solid: 80 mg (66%), mp = 202–203 °C;  $^1\text{H NMR}$  (600 MHz, DMSO- $d_6$ ):  $\delta = 8.88$  (s, 1H, NH), 7.61 (d,  $J = 5.2$  Hz, 1H, C=CH), 7.32 (d, 2H,  $J = 7.8$  Hz, ArH), 7.30 (d,  $J = 8.3$  Hz, 2H, ArH), 7.21 (d,  $J = 8.0$  Hz, 2H, ArH), 7.19 (d,  $J = 5.2$  Hz, 1H, C=CH), 7.18 (d,  $J = 8.5$  Hz, 2H, ArH), 7.04 (t,  $J = 3.3$  Hz, 1H, C=CH), 6.56 (s, 1H, C=CH), 5.43 (s, 1H, C=CH), 2.35 (s, 3H, ArCH<sub>3</sub>), 2.27 (s, 3H, ArCH<sub>3</sub>);  $^{13}\text{C NMR}$  (150 MHz, DMSO- $d_6$ ):  $\delta = 165.6, 143.8, 138.8, 138.4, 135.1, 134.2, 131.8, 131.4, 131.3, 130.4, 130.4, 130.2, 130.2, 130.2, 128.6, 128.5, 128.5, 118.8, 118.8, 100.7, 93.5, 21.2, 20.9$ ; **HRMS** (TOF ES+): m/z calcd for C<sub>23</sub>H<sub>21</sub>N<sub>2</sub>S<sub>2</sub>O: [(M+H)<sup>+</sup>], 405.1090, found, 405.1092

**(E)-5-(((2-Methylfuran-3-yl)thio)methylene)-1-(p-tolyl)-3-(p-tolylamino)-1,5-dihydro-2H-pyrrol-2-one (4w).**

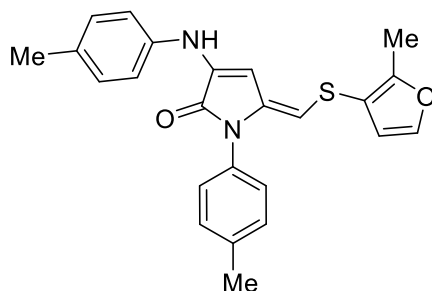

$V_{\text{Petroleum ether}}/V_{\text{Ethyl acetate}} = 10:1$ ,  $R_f = 0.2$ ; Yellow solid: 83 mg (69%), mp = 195–196 °C;  $^1\text{H NMR}$  (600 MHz, CDCl<sub>3</sub>):  $\delta = 7.26$  (d,  $J = 6.5$  Hz, 2H, ArH), 7.25 (d,  $J = 2.0$  Hz, 1H, C=CH), 7.18 (d,  $J = 8.4$  Hz, 2H, ArH), 7.16 (d,  $J = 8.5$  Hz, 2H, ArH), 7.09 (d,  $J = 8.2$  Hz, 2H, ArH), 6.81 (s, 1H, NH), 6.62 (s, 1H, C=CH), 6.31 (d,  $J = 2.0$  Hz, 1H, C=CH), 5.48 (s, 1H, C=CH), 2.39 (s, 3H, CH<sub>3</sub>), 2.34 (s, 3H, ArCH<sub>3</sub>), 2.31 (s, 3H, ArCH<sub>3</sub>);  $^{13}\text{C NMR}$  (150 MHz, CDCl<sub>3</sub>):  $\delta = 165.8, 154.1, 140.8, 140.7, 138.2, 137.9, 133.1, 131.8, 131.1, 130.1, 130.1, 130.1, 130.1, 127.8, 127.8, 117.5, 117.5, 114.3, 109.9, 104.4, 94.3, 21.3, 20.8, 11.9$ ; **HRMS** (TOF ES+): m/z calcd for C<sub>24</sub>H<sub>23</sub>N<sub>2</sub>SO<sub>2</sub>: [(M+H)<sup>+</sup>], 403.1475, found, 403.1483.

**(E)-4-Methyl-1-phenyl-3-(phenylamino)-5-((phenylthio)methylene)-1,5-dihydro-2H-pyrrol-2-one (4x).**

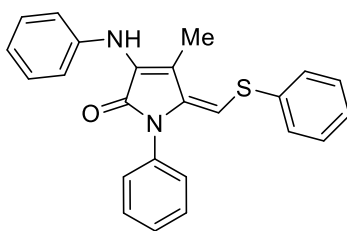

$V_{\text{Petroleum ether}}/V_{\text{Ethyl acetate}} = 7:1$ ,  $R_f = 0.2$ ; Yellow solid: 85 mg (74%),  $E/Z = 1/1$ , mp = 192–193 °C;

**Major:**  $^1\text{H NMR}$  (600 MHz,  $\text{DMSO-}d_6$ ):  $\delta$  = 8.21 (s, 1H, NH) (minor), 7.93 (s, 1H, NH), 7.53 (d,  $J$  = 7.7 Hz, 2H, ArH), 7.47–7.41 (m, 3H, ArH) (minor), 7.51 (d,  $J$  = 8.3 Hz, 3H, ArH), 7.39 (d,  $J$  = 7.5 Hz, 1H, ArH), 7.35–7.34 (m, 2H, ArH), 7.22 (t,  $J$  = 7.8 Hz, 2H, ArH), 7.19 (t,  $J$  = 7.8 Hz, 2H, ArH) (minor), 6.89 (d,  $J$  = 7.8 Hz, 2H, ArH), 6.84–6.82 (m, 3H, ArH), 6.78 (t,  $J$  = 7.3 Hz, 1H, ArH) (minor), 6.12 (s, 1H, C=CH), 5.72 (s, 1H, C=CH) (minor), 2.14 (s, 3H,  $\text{CH}_3$ ), 1.96 (s, 3H,  $\text{CH}_3$ ) (minor);  $^{13}\text{C NMR}$  (150 MHz,  $\text{DMSO-}d_6$ ):  $\delta$  = 167.1, 164.7 (minor), 143.8, 142.9 (minor), 140.2, 136.0, 134.6 (minor), 137.4, 130.1, 130.1, 129.9, 129.9, 129.9, 129.9, 129.7, 129.5, 129.3, 129.1, 129.1, 129.0, 129.0, 128.9 (minor), 128.8 (minor), 128.6 (minor), 128.6, 128.6, 127.6, 123.8 (minor), 120.4 (minor), 119.7 (minor), 118.4 (minor), 116.9, 105.2 (minor), 104.3, 14.6 (minor), 10.9; **HRMS** (TOF ES<sup>+</sup>):  $m/z$  calcd for  $\text{C}_{24}\text{H}_{21}\text{N}_2\text{OS}$  [(M+H)<sup>+</sup>], 385.1369, found, 385.1340.

**(E)-1-(4-Methoxyphenyl)-3-((4-methoxyphenyl)amino)-4-methyl-5-((phenylthio)methylene)-1,5-dihydro-2H-pyrrol-2-one (4y).**

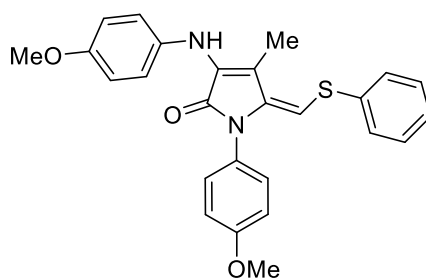

$V_{\text{Petroleum ether}}/V_{\text{Ethyl acetate}} = 5:1$ ,  $R_f = 0.2$ ; Yellow solid: 103 mg (78%),  $E/Z = 1/1$ , mp = 142–143 °C;

**Major:**  $^1\text{H NMR}$  (600 MHz,  $\text{DMSO-}d_6$ ):  $\delta$  = 7.79 (s, 1H, NH) (minor), 7.67 (s, 1H, NH), 7.36 (d,  $J$  = 7.7 Hz, 2H, ArH) (minor), 7.33–7.31 (m, 3H, ArH), 7.29 (d,  $J$  = 9.3 Hz, 2H, ArH), 7.24 (d,  $J$  = 8.9 Hz, 2H, ArH), 7.05 (d,  $J$  = 8.8 Hz, 2H, ArH), 7.03 (d,  $J$  = 8.6 Hz, 2H, ArH) (minor), 6.91 (d,  $J$  = 8.7 Hz, 2H, ArH), 6.82 (d,  $J$  = 8.8 Hz, 2H, ArH), 5.95 (s, 1H, C=CH), 5.57 (s, 1H, C=CH) (minor), 3.81 (s, 3H, ArOMe), 3.78 (s, 3H, ArOMe) (minor), 3.71 (s, 3H, ArOMe), 3.70 (s, 3H, ArOMe) (minor), 2.06 (s, 3H,  $\text{CH}_3$ ), 1.86 (s, 3H,  $\text{CH}_3$ ) (minor);  $^{13}\text{C NMR}$  (150 MHz,  $\text{DMSO-}d_6$ ):  $\delta$  = 167.3, 164.9 (minor), 159.6, 159.3 (minor), 154.4, 153.4 (minor), 141.8, 138.3, 136.4, 135.6, 133.4 (minor), 131.0, 130.6 (minor), 129.9, 129.9 (minor), 128.9, 128.9, 128.9, 128.9, 128.7 (minor), 128.6, 128.3, 128.3, 127.4, 127.1 (minor), 120.7 (minor), 119.9, 117.7 (minor), 115.0, 114.4, 114.4, 114.2 (minor), 112.7, 102.9 (minor), 102.2, 55.8, 55.6, 14.3, 10.9 (minor); **HRMS** (TOF ES<sup>+</sup>):  $m/z$  calcd for  $\text{C}_{26}\text{H}_{25}\text{N}_2\text{O}_3\text{S}$  [(M+H)<sup>+</sup>], 445.1580, found, 445.1590.

**(E)-1-(4-Chlorophenyl)-3-((4-chlorophenyl)amino)-4-methyl-5-((phenylthio)methylene)-1,5-dihydro-2H-pyrrol-2-one (4z).**

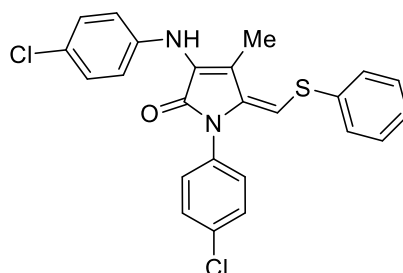

$V_{\text{Petroleum ether}}/V_{\text{Ethyl acetate}} = 7:1$ ,  $R_f = 0.2$ ; Yellow solid: 70 mg (52%),  $E/Z = 1/1$ , mp = 127–128 °C;

**Major:**  $^1\text{H NMR}$  (600 MHz,  $\text{DMSO-}d_6$ ):  $\delta$  = 8.13 (s, 1H, NH, minor), 8.13 (s, 1H, NH), 7.58 (d,

8.6 Hz, 2H, ArH), 7.58 (d, 8.6 Hz, 2H, ArH), 7.44 (d,  $J = 8.5$  Hz, 2H, ArH), 7.38 (d,  $J = 8.4$  Hz, 3H, ArH), 7.30–7.27 (m, 2H, ArH) (minor), 7.24 (d,  $J = 8.7$  Hz, 2H, ArH), 7.21 (d,  $J = 8.7$  Hz, 2H, ArH) (minor), 6.87 (d,  $J = 8.7$  Hz, 2H, ArH), 6.81 (s, 2H, ArH) (minor), 6.20 (s, 1H, C=CH), 6.20 (s, 1H, C=CH) (minor), 2.16 (s, 3H, CH<sub>3</sub>), 1.97 (s, 3H, CH<sub>3</sub>) (minor); <sup>13</sup>C NMR (150 MHz, DMSO-*d*<sub>6</sub>):  $\delta = 166.8, 164.4$  (minor), 142.8 (minor), 142.2, 139.4, 136.9 (minor), 135.8, 135.6, 134.8 (minor), 133.4, 133.3 (minor), 133.1, 132.0 (minor), 131.4, 131.1, 130.1, 130.1, 129.9, 129.9, 129.9 (minor), 129.5 (minor), 129.2, 129.2, 128.9, 128.7, 128.7, 128.6 (minor), 127.7 (minor), 127.6, 125.6, 123.6, 122.9 (minor), 120.5 (minor), 118.9, 118.1 (minor), 106.4 (minor), 105.1, 14.5, 10.8 (minor); HRMS (TOF ES<sup>+</sup>):  $m/z$  calcd for C<sub>24</sub>H<sub>19</sub>Cl<sub>2</sub>N<sub>2</sub>OS [(M+H)<sup>+</sup>], 453.0590, found, 453.0588.

**(*E*)-4-(4-Chlorophenyl)-5-((phenylthio)methylene)-1-(*p*-tolyl)-3-(*p*-tolylamino)-1,5-dihydro-2-*H*-pyrrol-2-one (4a’).**

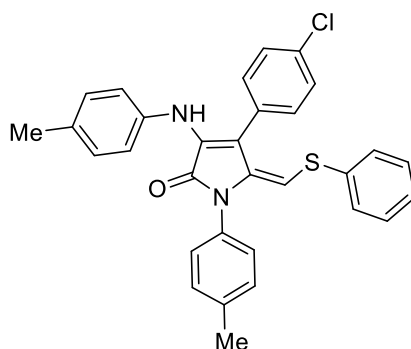

V<sub>Petroleum ether</sub>/V<sub>Ethyl acetate</sub> = 7:1, R<sub>f</sub> = 0.2; Yellow solid: 94 mg (62%), *E/Z* = 5/1, mp = 205–206 °C; **Major:** <sup>1</sup>H NMR (600 MHz, CDCl<sub>3</sub>):  $\delta = 7.32$  (d,  $J = 8.8$  Hz, 2H, ArH), 7.28 (d,  $J = 8.3$  Hz, 1H, ArH), 7.22 (d,  $J = 7.4$  Hz, 1H, ArH), 7.17–7.15 (m, 3H, ArH), 7.13 (d,  $J = 6.4$  Hz, 2H, ArH), 7.06 (d,  $J = 8.2$  Hz, 2H, ArH), 6.73 (d,  $J = 7.9$  Hz, 3H, ArH), 6.52 (d,  $J = 7.7$  Hz, 1H, ArH), 6.48 (d,  $J = 8.0$  Hz, 2H, ArH), 6.42 (s, 1H, NH), 5.82 (s, 1H, C=CH), 2.44 (s, 3H, ArCH<sub>3</sub>), 2.18 (s, 3H, ArCH<sub>3</sub>); <sup>13</sup>C NMR (150 MHz, CDCl<sub>3</sub>):  $\delta = 166.8, 164.6$  (minor), 139.0, 138.5 (minor), 137.6 (minor), 136.9 (minor), 136.6, 136.2, 136.0, 135.6 (minor), 133.6 (minor), 133.4, 133.2 (minor), 132.5, 132.4 (minor), 132.0 (minor), 131.3 (minor), 131.2 (minor), 131.9, 130.7 (minor), 130.9, 130.9, 130.2 (minor), 130.0, 130.0, 129.2, 129.2, 129.1, 129.1, 129.1, 129.1, 129.1, 129.0, 129.0, 128.7, 128.7, 128.6 (minor), 128.6 (minor), 128.5 (minor), 128.4 (minor), 128.1, 128.1, 127.8 (minor), 127.0, 126.6 (minor), 121.9, 120.2, 120.2, 112.9 (minor), 109.2 (minor), 106.8 (minor), 106.5, 21.5, 21.3 (minor), 20.8 (minor), 20.7; HRMS (TOF ES<sup>+</sup>):  $m/z$  calcd for C<sub>31</sub>H<sub>26</sub>ClN<sub>2</sub>OS [(M+H)<sup>+</sup>], 509.1449, found, 509.1453.

**(*E*)-1-Phenyl-3-(phenylamino)-5-((phenylselanyl)methylene)-1,5-dihydro-2-*H*-pyrrol-2-one (6 a).**

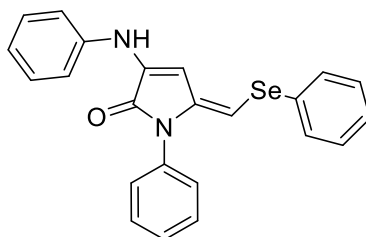

$V_{\text{Petroleum ether}}/V_{\text{Ethyl acetate}} = 10:1$ ,  $R_f = 0.2$ ; Yellow solid: 25 mg (61%), mp = 154–155 °C;  $^1\text{H NMR}$  (600 MHz,  $\text{CDCl}_3$ ):  $\delta = 7.50$  (t,  $J = 7.6$  Hz, 2H, ArH), 7.41 (d,  $J = 7.1$  Hz, 3H, ArH), 7.26 (t,  $J = 7.1$  Hz, 4H, ArH), 7.27 (d,  $J = 7.2$  Hz, 2H, ArH), 7.24 (t,  $J = 7.2$  Hz, 1H, ArH), 7.17 (d,  $J = 7.9$  Hz, 2H, ArH), 7.04 (d,  $J = 7.3$  Hz, 1H, ArH), 6.91 (s, 1H, NH), 6.66 (s, 1H, C=CH), 6.07 (s, 1H, C=CH);  $^{13}\text{C NMR}$  (150 MHz,  $\text{CDCl}_3$ ):  $\delta = 166.3, 145.3, 140.2, 133.7, 133.6, 131.7, 130.6, 130.6, 129.6, 129.6, 129.5, 129.5, 129.4, 129.4, 128.3, 128.1, 128.1, 126.9, 122.4, 117.5, 117.5, 97.3, 96.6$ ; **HRMS** (TOF ES+): m/z calcd for  $\text{C}_{23}\text{H}_{19}\text{N}_2\text{SeO}$ :  $[(\text{M}+\text{H})^+]$ , 419.0657, found, 419.0661.

**(E)-5-((Phenylselanyl)methylene)-1-(p-tolyl)-3-(p-tolylamino)-1,5-dihydro-2H-pyrrol-2-one (6b).**

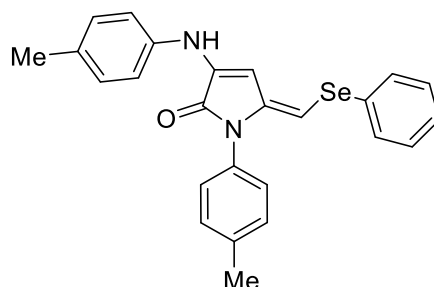

$V_{\text{Petroleum ether}}/V_{\text{Ethyl acetate}} = 10:1$ ,  $R_f = 0.2$ ; Yellow solid: 28 mg (63%), mp = 177–178 °C;  $^1\text{H NMR}$  (600 MHz,  $\text{CDCl}_3$ ):  $\delta = 7.40$  (d,  $J = 7.1$  Hz, 2H, ArH), 7.28 (d,  $J = 7.8$  Hz, 2H, ArH), 7.25 (d,  $J = 6.6$  Hz, 2H, ArH), 7.22 (d,  $J = 8.1$  Hz, 3H, ArH), 7.16 (d,  $J = 7.9$  Hz, 2H, ArH), 7.06 (d,  $J = 8.1$  Hz, 2H, ArH), 6.83 (s, 1H, NH), 6.58 (s, 1H, C=CH), 6.01 (s, 1H, C=CH), 2.39 (s, 3H, ArCH<sub>3</sub>), 2.33 (s, 3H, ArCH<sub>3</sub>);  $^{13}\text{C NMR}$  (150 MHz,  $\text{CDCl}_3$ ):  $\delta = 166.4, 145.8, 138.3, 137.7, 134.0, 131.9, 131.8, 131.0, 130.6, 130.6, 130.1, 130.1, 130.1, 130.1, 129.3, 129.3, 127.9, 127.9, 126.8, 117.6, 117.6, 96.5, 95.8, 21.3, 20.8$ ; **HRMS** (TOF ES+): m/z calcd for  $\text{C}_{25}\text{H}_{23}\text{N}_2\text{SeO}$ :  $[(\text{M}+\text{H})^+]$ , 447.0970, found, 447.0973.

**(E)-1-(3,4-Dimethylphenyl)-3-((3,4-dimethylphenyl)amino)-5-((phenylselanyl)methylene)-1,5-dihydro-2H-pyrrol-2-one (6c).**

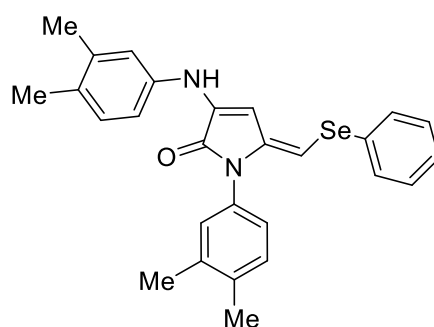

$V_{\text{Petroleum ether}}/V_{\text{Ethyl acetate}} = 10:1$ ,  $R_f = 0.2$ ; Yellow solid: 30 mg (64%), mp = 176–178 °C;  $^1\text{H NMR}$  (600 MHz,  $\text{CDCl}_3$ ):  $\delta = 7.40$  (d,  $J = 7.3$  Hz, 2H, ArH), 7.25 (s, 2H, ArH), 7.22 (d,  $J = 7.3$  Hz, 2H, ArH), 7.12 (d,  $J = 8.1$  Hz, 2H, ArH), 7.06 (d,  $J = 7.7$  Hz, 1H, ArH), 6.93 (d,  $J = 7.5$  Hz, 2H, ArH), 6.77 (s, 1H, NH), 6.56 (s, 1H, C=CH), 5.99 (s, 1H, C=CH), 2.29 (s, 6H, ArCH<sub>3</sub>), 2.27 (s, 3H, ArCH<sub>3</sub>), 2.24 (s, 3H, ArCH<sub>3</sub>);  $^{13}\text{C NMR}$  (150 MHz,  $\text{CDCl}_3$ ):  $\delta = 166.5, 146.1, 138.0, 137.9, 137.9, 137.1, 134.1, 131.9, 131.2, 130.8, 130.5, 130.5, 129.3, 129.3, 129.1, 126.8, 125.5, 119.2, 114.9, 96.3, 95.6, 20.1, 19.9, 19.6, 19.2$ ; **HRMS** (TOF ES+): m/z calcd for  $\text{C}_{27}\text{H}_{27}\text{N}_2\text{SeO}$ :  $[(\text{M}+\text{H})^+]$ , 475.1283, found, 475.1287.

**(E)-5-((Phenylselanyl)methylene)-1-(*o*-tolyl)-3-(*o*-tolylamino)-1,5-dihydro-2H-pyrrol-2-one (6d).**

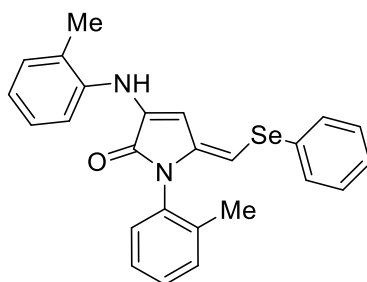

$V_{\text{Petroleum ether}}/V_{\text{Ethyl acetate}} = 10:1$ ,  $R_f = 0.2$ ; Yellow oli: 25 mg (57%);  $^1\text{H NMR}$  (600 MHz,  $\text{CDCl}_3$ ):  $\delta = 7.37$  (d,  $J = 7.9$  Hz, 3H, ArH), 7.34 (d,  $J = 4.1$  Hz, 2H, ArH), 7.30–7.28 (m, 2H, ArH), 7.25 (s, 1H, ArH), 7.24–7.22 (m, 2H, ArH), 7.21 (d,  $J = 6.9$  Hz, 2H, ArH), 7.00 (t,  $J = 7.4$  Hz, 1H, ArH), 6.66 (s, 1H, NH), 6.58 (s, 1H, C=CH), 5.76 (s, 1H, C=CH), 2.35 (s, 3H, ArCH<sub>3</sub>), 2.21 (s, 3H, ArCH<sub>3</sub>);  $^{13}\text{C NMR}$  (150 MHz,  $\text{CDCl}_3$ ): 166.2, 145.6, 138.4, 137.4, 134.3, 132.6, 131.8, 131.3, 131.0, 130.5, 130.5, 129.4, 129.3, 129.3, 129.3, 127.2, 127.0, 126.8, 126.9, 122.7, 117.0, 96.6, 96.1, 17.8, 17.6; **HRMS** (TOF ES<sup>+</sup>):  $m/z$  calcd for  $\text{C}_{25}\text{H}_{23}\text{N}_2\text{SeO}$ : [(M+H)<sup>+</sup>], 447.0970, found, 447.0977.

**(E)-1-(4-Chlorophenyl)-3-((4-chlorophenyl)amino)-5-((phenylselanyl)methylene)-1,5-dihydro-2H-pyrrol-2-one (6e).**

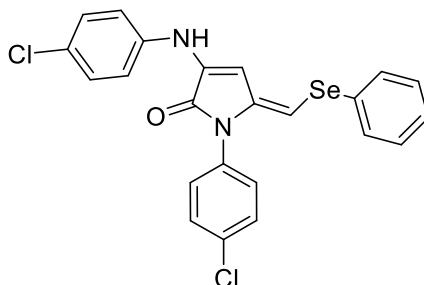

$V_{\text{Petroleum ether}}/V_{\text{Ethyl acetate}} = 9:1$ ,  $R_f = 0.2$ ; Yellow solid: 25 mg (52%),  $E/Z = 33/1$ , mp = 200–201 °C; **Major**:  $^1\text{H NMR}$  (600 MHz,  $\text{CDCl}_3$ ):  $\delta = 7.47$  (d,  $J = 8.5$  Hz, 2H, ArH), 7.41 (d,  $J = 6.9$  Hz, 2H, ArH), 7.32 (d,  $J = 8.7$  Hz, 2H, ArH), 7.29 (d,  $J = 8.6$  Hz, 4H, ArH), 7.25 (d,  $J = 7.1$  Hz, 1H, ArH), 7.09 (d,  $J = 8.7$  Hz, 2H, ArH), 6.91 (s, 1H, NH), 6.60 (s, 1H, C=CH), 6.08 (s, 1H, C=CH);  $^{13}\text{C NMR}$  (150 MHz,  $\text{CDCl}_3$ ):  $\delta = 165.9$ , 144.1, 138.7, 134.3, 133.3, 132.1, 132.1 (minor), 131.2, 130.9, 130.9, 129.8, 129.8, 129.8 (minor), 129.6, 129.6, 129.5, 129.5, 129.3, 129.3, 127.4, 127.2, 118.7, 118.7, 118.0 (minor), 98.5, 97.2; **HRMS** (TOF ES<sup>+</sup>):  $m/z$  calcd for  $\text{C}_{23}\text{H}_{17}\text{N}_2\text{Cl}_2\text{SeO}$ : [(M+H)<sup>+</sup>], 486.9878, found, 486.9876.

**(E)-1-(4-Bromophenyl)-3-((4-bromophenyl)amino)-5-((phenylselanyl)methylene)-1,5-dihydro-2H-pyrrol-2-one (6f).**

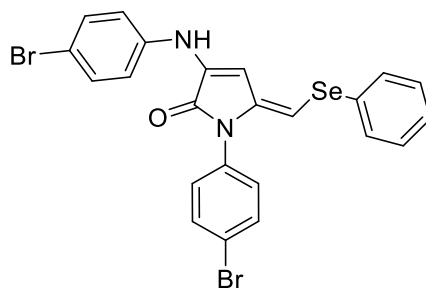

$V_{\text{Petroleum ether}}/V_{\text{Ethyl acetate}} = 10:1$ ,  $R_f = 0.2$ ; Yellow solid: 27 mg (47%),  $E/Z = 14/1$ , mp = 183–184 °C; **Major:**  $^1\text{H NMR}$  (600 MHz,  $\text{CDCl}_3$ ):  $\delta = 7.62$  (d,  $J = 8.5$  Hz, 2H, ArH), 7.47 (d,  $J = 8.6$  Hz, 2H, ArH), 7.41 (d,  $J = 7.2$  Hz, 2H, ArH), 7.29 (d,  $J = 6.4$  Hz, 2H, ArH), 7.23 (d,  $J = 8.5$  Hz, 3H, ArH), 7.04 (d,  $J = 8.7$  Hz, 2H, ArH), 6.88 (s, 1H, NH), 6.61 (s, 1H, C=CH), 6.09 (s, 1H, C=CH);  $^{13}\text{C NMR}$  (150 MHz,  $\text{CDCl}_3$ ):  $\delta = 165.8$ , 143.9, 139.2, 133.1, 132.7, 132.7, 132.6, 132.5, 132.5, 132.3 (minor), 132.3 (minor), 130.1, 130.9, 130.9, 129.6, 129.6, 129.4, 129.4, 127.2, 122.3, 118.9, 118.9, 118.4 (minor), 114.7, 104.7 (minor), 102.9 (minor), 98.6, 97.3; **HRMS** (TOF ES+):  $m/z$  calcd for  $\text{C}_{23}\text{H}_{17}\text{N}_2\text{Br}_2\text{SeO}$ :  $[(\text{M}+\text{H})^+]$ , 574.8867, found, 574.8867.

**(E)-5-((Phenylselanyl)methylene)-1-(4-(trifluoromethyl)phenyl)-3-((4-(trifluoromethyl)phenyl)amino)-1,5-dihydro-2H-pyrrol-2-one (6g).**

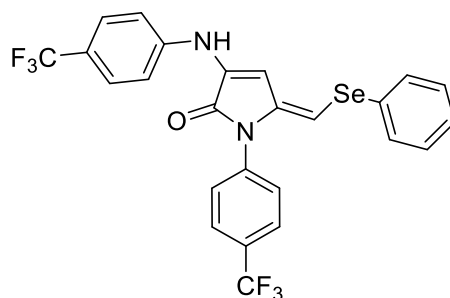

$V_{\text{Petroleum ether}}/V_{\text{Ethyl acetate}} = 10:1$ ,  $R_f = 0.2$ ; Yellow solid: 12 mg (21%),  $E/Z = 5/1$ , mp = 217–218 °C; **Major:**  $^1\text{H NMR}$  (600 MHz,  $\text{CDCl}_3$ ):  $\delta = 7.78$  (d,  $J = 8.1$  Hz, 2H, ArH), 7.61 (d,  $J = 8.3$  Hz, 2H, ArH), 7.55 (dd,  $J = 8.4$ , 4.3 Hz, 1H, ArH), 7.51 (d,  $J = 8.1$  Hz, 2H, ArH), 7.44 (d,  $J = 7.1$  Hz, 2H, ArH), 7.29 (d,  $J = 7.4$  Hz, 2H, ArH), 7.22 (d,  $J = 8.3$  Hz, 2H, ArH), 7.13 (s, 1H, NH), 6.77 (s, 1H, C=CH), 6.21 (s, 1H, C=CH);  $^{13}\text{C NMR}$  (150 MHz,  $\text{CDCl}_3$ ):  $\delta = 167.1$  (minor), 165.7, 143.0, 142.9, 136.8, 132.6 (minor), 132.5, 131.5 (minor), 131.3, 131.3, 130.8 (minor), 130.3 (d,  $J = 33.4$  Hz), 130.0 (minor), 129.6, 129.5, 129.5, 129.4, 128.2, 128.2, 127.5, 127.0 (minor), 126.9 (minor), 126.8 (minor), 126.8 (minor), 126.8, 126.7, 126.6 (minor), 126.6 (minor), 124.2 (d,  $J = 268.5$  Hz), 124.1 (d,  $J = 32.9$  Hz), 123.7 (d,  $J = 270.0$  Hz), 123.4 (minor), 123.2 (minor), 116.9, 116.9, 116.2, 106.1 (minor), 103.8 (minor), 100.2, 99.0; **HRMS** (TOF ES+):  $m/z$  calcd for  $\text{C}_{25}\text{H}_{16}\text{F}_6\text{N}_2\text{NaOSe}$ :  $[(\text{M}+\text{Na})^+]$ , 577.0224, found, 577.0223.

**(E)-5-((Benzylselanyl)methylene)-1-(p-tolyl)-3-(p-tolylamino)-1,5-dihydro-2H-pyrrol-2-one (6h).**

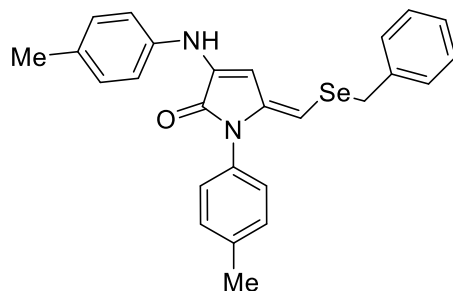

$V_{\text{Petroleum ether}}/V_{\text{Ethyl acetate}} = 8:1$ ,  $R_f = 0.2$ ; Yellow solid: 19 mg (42%), mp = 158–159 °C;  **$^1\text{H NMR}$**  (600 MHz,  $\text{CDCl}_3$ ):  $\delta = 7.27$  (d,  $J = 7.7$  Hz, 2H, ArH), 7.25 (d,  $J = 7.0$  Hz, 3H, ArH), 7.20 (d,  $J = 7.6$  Hz, 2H, ArH), 7.16 (d,  $J = 8.1$  Hz, 2H, ArH), 7.10 (d,  $J = 8.0$  Hz, 2H, ArH), 7.01 (d,  $J = 8.1$  Hz, 2H, ArH), 6.69 (s, 1H, NH), 6.34 (s, 1H, C=CH), 5.75 (s, 1H, C=CH), 3.89 (s, 2H,  $\text{CH}_2$ ), 2.42 (s, 3H, Ar $\text{CH}_3$ ), 2.34 (s, 3H, Ar $\text{CH}_3$ );  **$^{13}\text{C NMR}$**  (150 MHz,  $\text{CDCl}_3$ ):  $\delta = 166.2$ , 144.5, 138.3, 138.1, 137.8, 133.4, 131.8, 131.1, 130.0, 130.0, 129.9, 129.9, 128.9, 128.9, 128.6, 128.6, 127.8, 127.8, 127.0, 117.5, 117.5, 97.1, 96.0, 31.5, 21.3, 20.8; **HRMS** (TOF ES+): m/z calcd for  $\text{C}_{26}\text{H}_{25}\text{N}_2\text{SeO}$ : [(M+H) $^+$ ], 461.1127, found, 461.1134.

**(E)-5-((Methylselanyl)methylene)-1-(p-tolyl)-3-(p-tolylamino)-1,5-dihydro-2H-pyrrol-2-one (6i).**

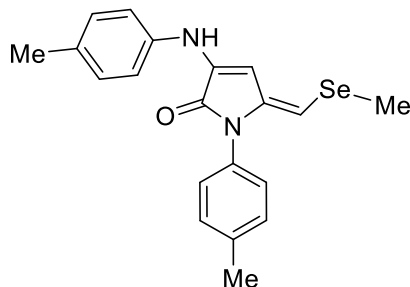

$V_{\text{Petroleum ether}}/V_{\text{Ethyl acetate}} = 8:1$ ,  $R_f = 0.2$ ; Yellow solid: 23 mg (61%),  $E/Z = 50/1$ , mp = 182–183 °C; **Major:  $^1\text{H NMR}$**  (600 MHz,  $\text{CDCl}_3$ ):  $\delta = 7.29$  (d,  $J = 8.0$  Hz, 2H, ArH), 7.19 (d,  $J = 8.1$  Hz, 2H, ArH), 7.17 (d,  $J = 8.2$  Hz, 2H, ArH), 7.07 (d,  $J = 8.3$  Hz, 2H, ArH), 6.78 (s, 1H, NH), 6.46 (s, 1H, C=CH), 5.80 (s, 1H, C=CH), 2.41 (s, 3H, Ar $\text{CH}_3$ ), 2.33 (s, 3H, Ar $\text{CH}_3$ ), 2.15 (s, 3H,  $\text{CH}_3$ );  **$^{13}\text{C NMR}$**  (150 MHz,  $\text{CDCl}_3$ ):  $\delta = 166.1$ , 141.8, 138.2, 137.9, 133.3, 131.7, 131.2, 130.0, 130.0, 130.0, 130.0, 129.2 (minor), 127.9, 127.9, 117.5, 117.5, 116.9 (minor), 99.6, 95.7, 21.3, 20.8, 8.2; **HRMS** (TOF ES+): m/z calcd for  $\text{C}_{20}\text{H}_{21}\text{N}_2\text{SeO}$ : [(M+H) $^+$ ], 385.0814, found, 385.0819.

**(E)-4-Methyl-1-phenyl-3-(phenylamino)-5-((phenylselanyl)methylene)-1,5-dihydro-2H-pyrrol-2-one (6j).**

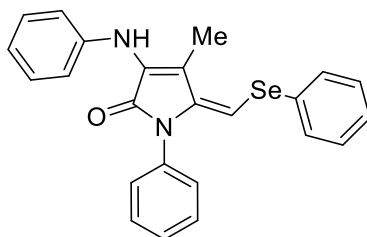

$V_{\text{Petroleum ether}}/V_{\text{Ethyl acetate}} = 10:1$ ,  $R_f = 0.2$ ; Yellow solid: 15 mg (36%),  $E/Z = 2/1$ , mp = 166–167 °C; **Major:  $^1\text{H NMR}$**  (600 MHz,  $\text{CDCl}_3$ ):  $\delta = 7.46$  (t,  $J = 7.6$  Hz, 2H, ArH), 7.42 (d,  $J = 7.3$  Hz, 2H,



ArH), 7.37 (t,  $J = 7.4$  Hz, 1H, ArH), 7.31 (d,  $J = 7.7$  Hz, 3H, ArH), 7.29–7.26 (m, 5H, ArH+NH), 6.99 (t,  $J = 7.4$  Hz, 1H, ArH), 6.95 (d,  $J = 7.8$  Hz, 2H, ArH), 6.16 (s, 1H, C=CH), 2.16 (s, 3H, CH<sub>3</sub>); <sup>13</sup>C NMR (150 MHz, CDCl<sub>3</sub>):  $\delta = 165.4, 141.7$  (minor), 141.3, 140.3, 134.8 (minor), 134.2, 138.8 (minor), 132.5, 131.6, 131.5, 131.5, 129.5, 129.5, 129.5, 129.5, 129.5, 129.5, 129.0, 129.0, 128.6, 128.6, 128.2, 127.9 (minor), 127.8 (minor), 127.6, 121.8, 121.5 (minor), 119.5 (minor), 118.8, 118.6 (minor), 117.2 (minor), 103.9, 102.6 (minor), 14.7, 11.5 (minor); HRMS (TOF ES<sup>+</sup>):  $m/z$  calcd for C<sub>24</sub>H<sub>21</sub>N<sub>2</sub>SeO: [(M+H)<sup>+</sup>], 433.0814, found, 433.0818.

**5-Methylene-1-phenyl-3-(phenylamino)-1,5-dihydro-2H-pyrrol-2-one (7a).**

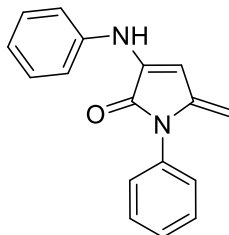

V<sub>Petroleum ether</sub>/V<sub>Ethyl acetate</sub> = 20:1, R<sub>f</sub> = 0.2; Yellow solid: 34 mg (66%), mp = 179–180 °C; <sup>1</sup>H NMR (600 MHz, DMSO-*d*<sub>6</sub>):  $\delta = 8.64$  (s, 1H, NH), 7.55 (t,  $J = 7.8$  Hz, 2H, ArH), 7.45 (t,  $J = 7.4$  Hz, 1H, ArH), 7.38 (d,  $J = 8.0$  Hz, 3H, ArH), 7.32 (d,  $J = 7.9$  Hz, 3H, ArH), 6.96 (t,  $J = 7.2$  Hz, 1H, ArH), 6.59 (s, 1H, C=CH), 4.78 (s, 1H, C=CH<sub>2</sub>), 4.48 (s, 1H, C=CH<sub>2</sub>); <sup>13</sup>C NMR (150 MHz, DMSO-*d*<sub>6</sub>):  $\delta = 165.9, 145.6, 141.8, 134.5, 133.7, 129.8, 129.8, 129.6, 129.6, 128.3, 128.3, 128.3, 121.7, 117.9, 117.9, 99.8, 92.8$ ; HRMS (TOF ES<sup>+</sup>):  $m/z$  calcd for C<sub>17</sub>H<sub>15</sub>N<sub>2</sub>O [(M+H)<sup>+</sup>], 263.1179, found, 263.1182.

**5-Methylene-1-(*p*-tolyl)-3-(*p*-tolylamino)-1,5-dihydro-2H-pyrrol-2-one (7b).**

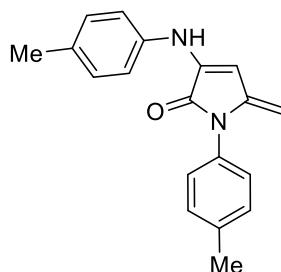

V<sub>Petroleum ether</sub>/V<sub>Ethyl acetate</sub> = 25:1, R<sub>f</sub> = 0.2; Gray yellow solid: 33 mg (57%), mp = 153–155 °C; <sup>1</sup>H NMR (600 MHz, DMSO-*d*<sub>6</sub>)  $\delta = 8.52$  (s, 1H, NH), 7.33 (d,  $J = 8.1$  Hz, 2H, ArH), 7.26 (d,  $J = 8.4$  Hz, 2H, ArH), 7.20 (d,  $J = 8.2$  Hz, 2H, ArH), 7.13 (d,  $J = 8.3$  Hz, 2H, ArH), 6.48 (s, 1H, C=CH), 4.72 (s, 1H, C=CH<sub>2</sub>), 4.43 (s, 1H, C=CH<sub>2</sub>), 2.37 (s, 3H, ArCH<sub>3</sub>), 2.26 (s, 3H, ArCH<sub>3</sub>); <sup>13</sup>C NMR (150 MHz, DMSO-*d*<sub>6</sub>):  $\delta = 166.0, 145.8, 139.4, 137.7, 133.9, 131.9, 130.5, 130.2, 130.2, 130.0, 130.0, 128.2, 128.2, 118.0, 118.0, 98.9, 92.3, 21.2, 20.8$ ; HRMS (TOF ES<sup>+</sup>):  $m/z$  calcd for C<sub>19</sub>H<sub>19</sub>N<sub>2</sub>O [(M+H)<sup>+</sup>], 291.1492, found, 291.1491.

**1-(3,4-Dimethylphenyl)-3-((3,4-dimethylphenyl)amino)-5-methylene-1,5-dihydro-2H-pyrrol-2-one (7c).**

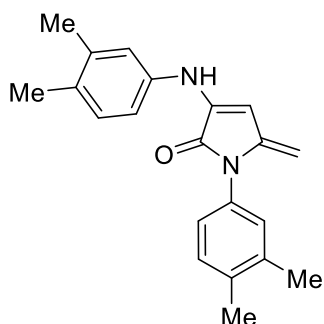

$V_{\text{Petroleum ether}}/V_{\text{Ethyl acetate}} = 15:1$ ,  $R_f = 0.2$ ; Yellow solid: 19 mg (31%), mp = 159–160 °C;  $^1\text{H NMR}$  (600 MHz,  $\text{DMSO-}d_6$ ):  $\delta = 8.37$  (s, 1H, NH), 7.27 (d,  $J = 7.7$  Hz, 1H, ArH), 7.14 (s, 1H, ArH), 7.08 (d,  $J = 9.6$  Hz, 3H, ArH), 7.02 (d,  $J = 7.4$  Hz, 1H, ArH), 6.47 (s, 1H, C=CH), 4.71 (s, 1H, C=CH<sub>2</sub>), 4.40 (s, 1H, C=CH<sub>2</sub>), 2.27 (d,  $J = 4.3$  Hz, 6H, ArCH<sub>3</sub>), 2.21 (s, 3H, ArCH<sub>3</sub>), 2.16 (s, 3H, ArCH<sub>3</sub>);  $^{13}\text{C NMR}$  (150 MHz,  $\text{DMSO-}d_6$ ):  $\delta = 166.0, 145.9, 139.6, 137.8, 137.3, 136.6, 133.9, 132.1, 130.5, 130.5, 129.5, 129.2, 125.7, 119.2, 115.5, 98.7, 92.3, 20.2, 19.8, 19.5, 19.2$ ; **HRMS** (TOF ES+):  $m/z$  calcd for  $\text{C}_{21}\text{H}_{23}\text{N}_2\text{O}$  [(M+H)<sup>+</sup>], 319.1805, found, 319.1805.

**1-(4-Fluorophenyl)-3-((4-fluorophenyl)amino)-5-methylene-1,5-dihydro-2H-pyrrol-2-one (7d).**

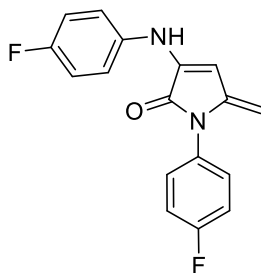

$V_{\text{Petroleum ether}}/V_{\text{Ethyl acetate}} = 18:1$ ,  $R_f = 0.2$ ; Yellow solid: 35 mg (59%), mp = 181–182 °C;  $^1\text{H NMR}$  (600 MHz,  $\text{DMSO-}d_6$ ):  $\delta = 8.86$  (s, 1H, NH), 7.41–7.38 (m, 4H, ArH), 7.37–7.35 (m, 2H, ArH), 7.16 (t,  $J = 8.2$ , 2H, ArH), 6.63 (s, 1H, C=CH), 4.82 (s, 1H, C=CH<sub>2</sub>), 4.55 (s, 1H, C=CH<sub>2</sub>);  $^{13}\text{C NMR}$  (150 MHz,  $\text{DMSO-}d_6$ ):  $\delta = 165.9, 161.7$  (d,  $J = 245.2$  Hz), 157.4 (d,  $J = 238.3$  Hz), 145.6, 138.3, 133.9, 130.7 (d,  $J = 2.7$  Hz), 130.6 (d,  $J = 8.8$  Hz), 130.6 (d,  $J = 8.8$  Hz), 119.6 (d,  $J = 7.8$  Hz), 119.6 (d,  $J = 7.8$  Hz), 119.6 (d,  $J = 7.8$  Hz), 116.6 (d,  $J = 22.8$  Hz), 116.6 (d,  $J = 22.8$  Hz), 116.2 (d,  $J = 22.2$  Hz), 99.2, 92.7; **HRMS** (TOF ES+):  $m/z$  calcd for  $\text{C}_{17}\text{H}_{13}\text{F}_2\text{N}_2\text{O}$  [(M+H)<sup>+</sup>], 299.0990, found, 299.0990.

**1-(2-Chlorophenyl)-3-((2-chlorophenyl)amino)-5-methylene-1,5-dihydro-2H-pyrrol-2-one (7e).**

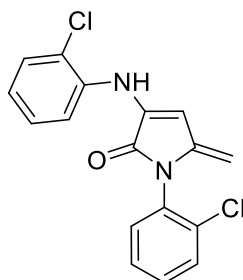

$V_{\text{Petroleum ether}}/V_{\text{Ethyl acetate}} = 15:1$ ,  $R_f = 0.2$ ; Yellow oli: 22 mg (34%),  $^1\text{H NMR}$  (600 MHz,  $\text{CDCl}_3$ ):  $\delta$

= 7.53–7.45 (m, 1H, ArH), 7.34 (t,  $J = 7.6$  Hz, 4H, ArH), 7.28 (dd,  $J = 7.2, 2.4$  Hz, 1H, ArH), 7.24 (t,  $J = 7.7$  Hz, 1H, ArH), 7.20 (s, 1H, NH), 6.89 (t,  $J = 7.6$  Hz, 1H, ArH), 6.31 (s, 1H, C=CH), 4.67 (s, 1H, C=CH<sub>2</sub>), 4.32 (s, 1H, C=CH<sub>2</sub>); <sup>13</sup>C NMR (150 MHz, CDCl<sub>3</sub>):  $\delta = 164.5, 143.3, 136.1, 132.9, 131.5, 130.7, 130.1, 129.6, 129.3, 128.9, 126.7, 126.7, 121.6, 121.2, 115.4, 99.4, 92.8$ ; HRMS (TOF ES<sup>+</sup>):  $m/z$  calcd for C<sub>17</sub>H<sub>13</sub>Cl<sub>2</sub>N<sub>2</sub>O [(M+H)<sup>+</sup>], 331.0399, found, 331.0403.

**1-(4-Bromophenyl)-3-((4-bromophenyl)amino)-5-methylene-1,5-dihydro-2H-pyrrol-2-one (7f).**

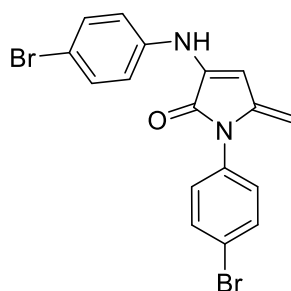

V<sub>Petroleum ether</sub>/V<sub>Ethyl acetate</sub> = 15:1, R<sub>f</sub> = 0.2; Yellow solid: 25 mg (30%), mp = 161–162 °C; <sup>1</sup>H NMR (600 MHz, DMSO-*d*<sub>6</sub>):  $\delta = 8.86$  (s, 1H, NH), 7.74 (d,  $J = 8.5$  Hz, 2H, ArH), 7.48 (d,  $J = 8.7$  Hz, 2H, ArH), 7.33 (dd,  $J = 8.2, 5.6$  Hz, 4H, ArH), 6.63 (s, 1H, C=CH), 4.82 (s, 1H, C=CH<sub>2</sub>), 4.55 (s, 1H, C=CH<sub>2</sub>); <sup>13</sup>C NMR (150 MHz, DMSO-*d*<sub>6</sub>):  $\delta = 165.6, 144.9, 141.2, 133.7, 133.3, 132.8, 132.8, 132.3, 132.3, 130.4, 130.4, 121.2, 119.9, 119.9, 113.0, 101.0, 93.5$ ; HRMS (TOF ES<sup>+</sup>):  $m/z$  calcd for C<sub>17</sub>H<sub>13</sub>Br<sub>2</sub>N<sub>2</sub>O [(M+H)<sup>+</sup>], 418.9389, found, 418.9392.

**1-(3-Bromophenyl)-3-((3-bromophenyl)amino)-5-methylene-1,5-dihydro-2H-pyrrol-2-one (7g).**

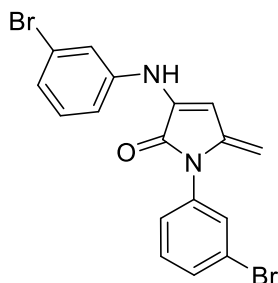

V<sub>Petroleum ether</sub>/V<sub>Ethyl acetate</sub> = 15:1, R<sub>f</sub> = 0.2; Yellow solid: 25 mg (30%), mp = 151–152 °C; <sup>1</sup>H NMR (600 MHz, DMSO-*d*<sub>6</sub>):  $\delta = 8.88$  (s, 1H, NH), 7.67 (d,  $J = 7.9$  Hz, 1H, ArH), 7.61 (s, 1H, ArH), 7.55 (s, 1H, ArH), 7.51 (t,  $J = 8.0$  Hz, 1H, ArH), 7.41–7.37 (m, 2H, ArH), 7.29 (t,  $J = 8.0$  Hz, 1H, ArH), 7.13 (d,  $J = 7.7$  Hz, 1H, ArH), 6.69 (s, 1H, C=CH), 4.88 (s, 1H, C=CH<sub>2</sub>), 4.56 (s, 1H, C=CH<sub>2</sub>); <sup>13</sup>C NMR (150 MHz, DMSO-*d*<sub>6</sub>):  $\delta = 165.6, 144.9, 143.5, 135.9, 133.0, 131.6, 131.6, 131.3, 131.1, 127.5, 124.2, 122.6, 122.1, 120.4, 116.4, 101.8, 93.9$ ; HRMS (TOF ES<sup>+</sup>):  $m/z$  calcd for C<sub>17</sub>H<sub>12</sub>Br<sub>2</sub>N<sub>2</sub>ONa [(M+Na)<sup>+</sup>], 440.9209, found, 440.9207.

**5-Methylene-1-(4-(trifluoromethyl)phenyl)-3-((4-(trifluoromethyl)phenyl)amino)-1,5-dihydro-2H-pyrrol-2-one (7h).**

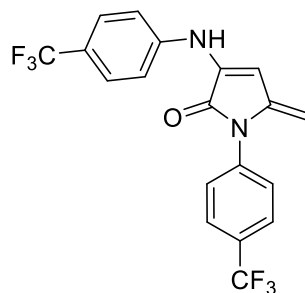

$V_{\text{Petroleum ether}}/V_{\text{Ethyl acetate}} = 15:1$ ,  $R_f = 0.2$ ; Yellow solid: 43 mg (54%), mp = 209–210 °C;  $^1\text{H NMR}$  (600 MHz,  $\text{DMSO-}d_6$ ):  $\delta = 9.18$  (s, 1H, NH), 7.92 (d,  $J = 7.7$  Hz, 2H, ArH), 7.64 (dd,  $J = 13.1, 8.4$  Hz, 4H, ArH), 7.55 (d,  $J = 8.0$  Hz, 2H, ArH), 6.85 (s, 1H, C=CH), 4.92 (s, 1H, C=CH<sub>2</sub>), 4.69 (s, 1H, C=CH<sub>2</sub>);  $^{13}\text{C NMR}$  (150 MHz,  $\text{DMSO-}d_6$ ):  $\delta = 165.5, 145.3, 144.4, 138.1, 132.8, 128.8, 128.8, 128.4$  (d,  $J = 32.2$  Hz), 126.9, 126.9, 126.8, 126.8, 125.1 (d,  $J = 270.0$  Hz), 124.5 (d,  $J = 270.0$  Hz), 121.4 (d,  $J = 31.8$  Hz), 117.6, 117.6, 103.3, 94.6; **HRMS** (TOF ES<sup>+</sup>): m/z calcd for  $\text{C}_{19}\text{H}_{13}\text{F}_6\text{N}_2\text{O}$  [(M+H)<sup>+</sup>], 399.0927, found, 399.0927.

#### 4-Methyl-5-methylene-1-phenyl-3-(phenylamino)-1,5-dihydro-2H-pyrrol-2-one (7i).

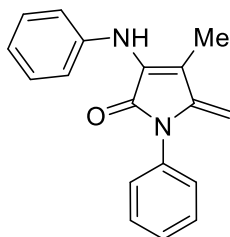

$V_{\text{Petroleum ether}}/V_{\text{Ethyl acetate}} = 15:1$ ,  $R_f = 0.2$ ; Yellow solid: 17 mg (31%), mp = 178–179 °C;  $^1\text{H NMR}$  (600 MHz,  $\text{DMSO-}d_6$ ):  $\delta = 8.09$  (s, 1H, NH), 7.53 (d,  $J = 15.5$  Hz, 2H, ArH), 7.42 (t,  $J = 7.4$  Hz, 1H, ArH), 7.32 (d,  $J = 7.4$  Hz, 2H, ArH), 7.22 (t,  $J = 7.8$  Hz, 2H, ArH), 6.90 (d,  $J = 7.7$  Hz, 2H, ArH), 6.84 (t,  $J = 7.3$  Hz, 1H, ArH), 4.89 (d,  $J = 1.7$  Hz, 1H, C=CH<sub>2</sub>), 4.55 (d,  $J = 1.6$  Hz, 1H, C=CH<sub>2</sub>), 1.88 (s, 3H, CH<sub>3</sub>);  $^{13}\text{C NMR}$  (150 MHz,  $\text{DMSO-}d_6$ ):  $\delta = 165.9, 146.7, 142.9, 134.9, 130.9, 129.7, 129.7, 129.1, 129.1, 128.4, 128.4, 128.1, 120.5, 118.2, 118.1, 118.1, 91.7, 11.1$ ; **HRMS** (TOF ES<sup>+</sup>): m/z calcd for  $\text{C}_{18}\text{H}_{17}\text{N}_2\text{O}$  [(M+H)<sup>+</sup>], 277.1335, found, 277.1338.

#### (E)-1-Phenyl-3-(phenylamino)-5-propylidene-1,5-dihydro-2H-pyrrol-2-one (7j).

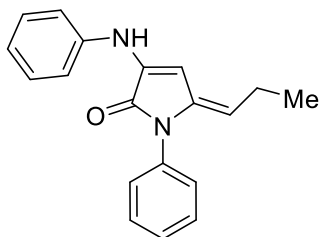

$V_{\text{Petroleum ether}}/V_{\text{Ethyl acetate}} = 15:1$ ,  $R_f = 0.2$ ; Yellow solid: 21 mg (36%), mp = 180–181 °C;  $^1\text{H NMR}$  (600 MHz,  $\text{DMSO-}d_6$ ):  $\delta = 8.50$  (s, 1H, NH), 7.53 (t,  $J = 7.6$  Hz, 2H, ArH), 7.45 (d,  $J = 7.5$  Hz, 1H, ArH), 7.41 (d,  $J = 8.0$  Hz, 2H, ArH), 7.33–7.30 (m, 4H, ArH), 6.95 (t,  $J = 7.3$  Hz, 1H, ArH), 6.74 (s, 1H, C=CH), 4.93 (t,  $J = 8.0$  Hz, 1H, C=CH), 2.34 (p,  $J = 7.5$  Hz, 2H, ArH), 0.97 (t,  $J = 7.4$  Hz, 3H, CH<sub>3</sub>);  $^{13}\text{C NMR}$  (150 MHz,  $\text{DMSO-}d_6$ ):  $\delta = 165.5, 141.9, 139.2, 134.8, 133.1, 129.7, 129.7, 129.6, 129.6, 128.8, 128.8, 128.3, 121.5, 117.9, 117.9, 111.9, 96.4, 20.5, 15.5$ ; **HRMS**

(TOF ES+): m/z calcd for C<sub>19</sub>H<sub>19</sub>N<sub>2</sub>O [(M+H)<sup>+</sup>], 291.1492, found, 291.1493.

**(E)-5-Propylidene-1-(p-tolyl)-3-(p-tolylamino)-1,5-dihydro-2H-pyrrol-2-one (7k).**

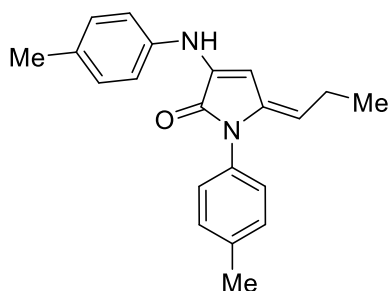

V<sub>Petroleum ether</sub>/V<sub>Ethyl acetate</sub> = 10:1, R<sub>f</sub> = 0.2; Yellow solid: 27 mg (43%), mp = 194–195 °C; <sup>1</sup>H NMR (600 MHz, CDCl<sub>3</sub>): δ = 7.29 (d, J = 8.0 Hz, 2H, ArH), 7.19 (d, J = 8.1 Hz, 2H, ArH), 7.16 (d, J = 8.1 Hz, 2H, ArH), 7.06 (d, J = 8.1 Hz, 2H, ArH), 6.69 (s, 1H, NH), 6.38 (s, 1H, C=CH), 5.05 (t, J = 8.0 Hz, 1H, C=CH), 2.41 (s, 3H, ArCH<sub>3</sub>), 2.33 (s, 3H, ArCH<sub>3</sub>), 2.33–2.28 (m, J = 7.6 Hz, 2H, CH<sub>2</sub>), 1.04 (t, J = 7.5 Hz, 3H, CH<sub>3</sub>); <sup>13</sup>C NMR (150 MHz, CDCl<sub>3</sub>): δ = 165.9, 139.1, 138.4, 137.9, 132.8, 131.7, 131.3, 129.9, 129.9, 129.9, 129.9, 128.1, 128.1, 117.3, 117.3, 112.6, 94.5, 21.3, 20.9, 20.8, 15.0; HRMS (TOF ES+): m/z calcd for C<sub>21</sub>H<sub>23</sub>N<sub>2</sub>O [(M+H)<sup>+</sup>], 319.1805, found, 319.1805.

**(E)-5-Pentadecylidene-1-phenyl-3-(phenylamino)-1,5-dihydro-2H-pyrrol-2-one (7l).**

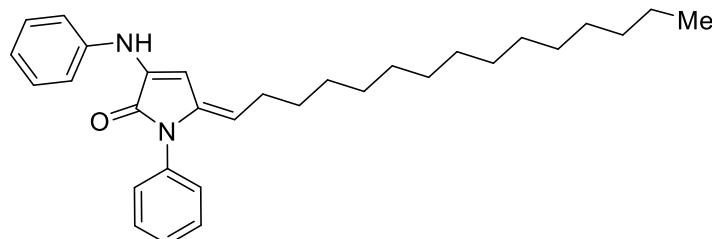

V<sub>Petroleum ether</sub>/V<sub>Ethyl acetate</sub> = 20:1, R<sub>f</sub> = 0.2; Light yellow solid: 50 mg (55%), mp = 66–67 °C; <sup>1</sup>H NMR (600 MHz, CDCl<sub>3</sub>): δ = 7.42 (t, J = 7.7 Hz, 2H, ArH), 7.33 (d, J = 7.4 Hz, 1H, ArH), 7.31 (d, J = 8.1 Hz, 2H, ArH), 7.24 (d, J = 7.5 Hz, 2H, ArH), 7.11 (d, J = 8.1 Hz, 2H, ArH), 6.94 (t, J = 7.3 Hz, 1H, ArH), 6.87 (s, 1H, NH), 6.39 (s, 1H, C=CH), 5.03 (t, J = 8.1 Hz, 1H, C=CH), 2.28 (t, J = 7.5 Hz, 6H, CH<sub>2</sub>), 2.24–2.21 (m, 2H, CH<sub>2</sub>), 1.58–1.53 (m, 7H, CH<sub>2</sub>), 1.33 (t, J = 7.4, 3H, CH<sub>3</sub>), 0.82–0.80 (m, 12H, CH<sub>2</sub>); <sup>13</sup>C NMR (150 MHz, CDCl<sub>3</sub>): δ = 178.1, 164.2, 139.3, 137.5, 132.6, 130.8, 127.8, 127.6, 126.6, 126.3, 120.1, 115.5, 110.3, 93.9, 32.4, 30.3, 28.5, 28.1, 28.1, 28.0, 28.0, 28.0, 27.9, 27.9, 27.8, 27.8, 27.7, 25.9, 23.0, 21.1, 12.5; HRMS (TOF ES+): m/z calcd for C<sub>31</sub>H<sub>43</sub>N<sub>2</sub>O [(M+H)<sup>+</sup>], 459.3370, found, 459.3369.

**(E)-5-Benzylidene-1-(p-tolyl)-3-(p-tolylamino)-1,5-dihydro-2H-pyrrol-2-one (7m).**

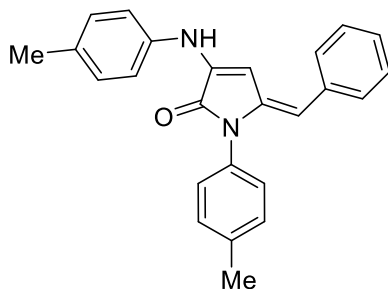

$V_{\text{Petroleum ether}}/V_{\text{Ethyl acetate}} = 10:1$ ,  $R_f = 0.2$ ; Yellow solid: 45 mg (61%), mp = 222–223 °C;  $^1\text{H NMR}$  (600 MHz,  $\text{CDCl}_3$ ):  $\delta = 7.37\text{--}7.35$  (m, 3H, ArH), 7.33 (d,  $J = 8.1$  Hz, 3H, ArH), 7.27–7.24 (m, 3H, ArH), 7.16 (d,  $J = 8.1$  Hz, 2H, ArH), 7.06 (d,  $J = 8.2$  Hz, 2H, ArH), 6.82 (s, 1H, NH), 6.66 (s, 1H, C=CH), 6.03 (s, 1H, C=CH), 2.44 (s, 3H, ArCH<sub>3</sub>), 2.33 (s, 3H, ArCH<sub>3</sub>);  $^{13}\text{C NMR}$  (150 MHz,  $\text{CDCl}_3$ ):  $\delta = 165.7, 140.8, 138.3, 137.9, 136.2, 134.3, 131.7, 131.4, 130.0, 130.0, 128.9, 128.9, 128.7, 128.4, 126.7, 117.5, 117.5, 110.1, 95.1, 21.3, 20.8$ ; **HRMS** (TOF ES<sup>+</sup>):  $m/z$  calcd for  $\text{C}_{21}\text{H}_{23}\text{N}_2\text{O}$ :  $[(\text{M}+\text{H})^+]$ , 367.1805, found, 367.1805.

**(E)-5-(4-Chlorobenzylidene)-1-(p-tolyl)-3-(p-tolylamino)-1,5-dihydro-2H-pyrrol-2-one (7n).**

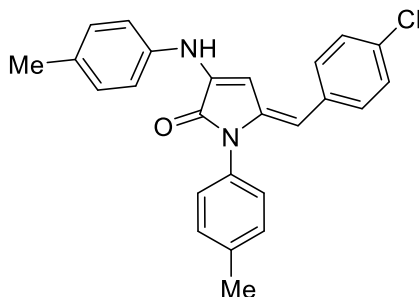

$V_{\text{Petroleum ether}}/V_{\text{Ethyl acetate}} = 10:1$ ,  $R_f = 0.2$ ; Yellow solid: 47 mg (59%), mp = 236–237 °C;  $^1\text{H NMR}$  (600 MHz,  $\text{CDCl}_3$ ):  $\delta = 7.32$  (t,  $J = 7.5$  Hz, 4H, ArH), 7.26 (t,  $J = 5.9$  Hz, 4H, ArH), 7.17 (d,  $J = 7.9$  Hz, 2H, ArH), 7.05 (d,  $J = 7.9$  Hz, 2H, ArH), 6.84 (s, 1H, NH), 6.57 (s, 1H, C=CH), 5.94 (s, 1H, C=CH), 2.44 (s, 3H, ArCH<sub>3</sub>), 2.34 (s, 3H, ArCH<sub>3</sub>);  $^{13}\text{C NMR}$  (150 MHz,  $\text{CDCl}_3$ ):  $\delta = 165.6, 141.2, 138.4, 137.8, 134.7, 134.6, 132.4, 131.9, 131.2, 130.1, 130.1, 130.1, 130.1, 130.0, 130.0, 128.8, 128.8, 128.4, 128.4, 117.6, 117.6, 108.6, 94.4, 21.3, 20.8$ ; **HRMS** (TOF ES<sup>+</sup>):  $m/z$  calcd for  $\text{C}_{25}\text{H}_{22}\text{ClN}_2\text{O}$ :  $[(\text{M}+\text{H})^+]$ , 401.1415, found, 401.1417.

**(E)-1-Phenyl-3-(phenylamino)-5-((tetrahydrofuran-2-yl)methylene)-1,5-dihydro-2H-pyrrol-2-one (8a).**

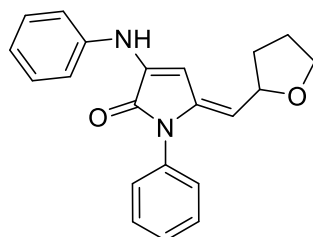

$V_{\text{Petroleum ether}}/V_{\text{Ethyl acetate}} = 8:1$ ,  $R_f = 0.2$ ; Yellow solid: 46 mg (70%), mp = 191–192 °C;  $^1\text{H NMR}$  (600 MHz,  $\text{CDCl}_3$ ):  $\delta = 7.49$  (t,  $J = 7.7$  Hz, 2H, ArH), 7.41 (t,  $J = 7.4$  Hz, 1H, ArH), 7.36 (t,  $J = 7.7$  Hz, 2H, ArH), 7.32 (d,  $J = 7.6$  Hz, 2H, ArH), 7.17 (d,  $J = 7.9$  Hz, 2H, ArH), 7.03 (t,  $J = 7.2$  Hz, 1H, ArH), 6.85 (s, 1H, NH), 6.52 (s, 1H, C=CH), 5.07 (d,  $J = 8.9$  Hz, 1H, C=CH), 4.77 (q,  $J = 8.2$  Hz, 1H, CH), 3.90 (q,  $J = 7.3$  Hz, 1H, CH<sub>2</sub>), 3.82 (q,  $J = 7.5$  Hz, 1H, CH<sub>2</sub>), 2.17–2.11 (m, 1H, CH<sub>2</sub>), 1.99–1.94 (m, 2H, CH<sub>2</sub>), 1.63–1.58 (m, 1H, CH<sub>2</sub>);  $^{13}\text{C NMR}$  (150 MHz,  $\text{CDCl}_3$ ):  $\delta = 165.9, 141.5, 140.5, 133.9, 133.1, 129.5, 129.5, 129.4, 129.4, 128.4, 128.4, 128.2, 122.1, 117.4, 117.4, 110.1, 94.9, 75.2, 68.2, 33.5, 26.4$ ; **HRMS** (TOF ES<sup>+</sup>):  $m/z$  calcd for  $\text{C}_{21}\text{H}_{21}\text{N}_2\text{O}_2$ :  $[(\text{M}+\text{H})^+]$ , 333.1598, found, 333.1601.

**(E)-5-((Tetrahydrofuran-2-yl)methylene)-1-(p-tolyl)-3-(p-tolylamino)-1,5-dihydro-2H-pyrrol-2-one (8b).**

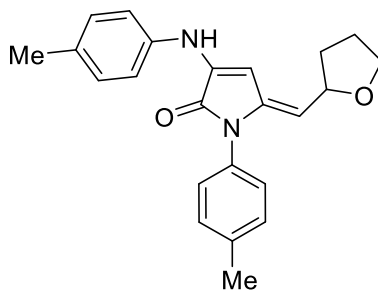

$V_{\text{Petroleum ether}}/V_{\text{Ethyl acetate}} = 8:1$ ,  $R_f = 0.2$ ; Yellow solid: 48 mg (68%), mp = 194–195 °C;  $^1\text{H NMR}$  (600 MHz,  $\text{CDCl}_3$ ):  $\delta = 7.28$  (d,  $J = 8.1$  Hz, 2H, ArH), 7.19 (d,  $J = 8.2$  Hz, 2H, ArH), 7.15 (d,  $J = 8.2$  Hz, 2H, ArH), 7.06 (d,  $J = 8.3$  Hz, 2H, ArH), 6.76 (s, 1H, NH), 6.43 (s, 1H, C=CH), 5.03 (d,  $J = 9.0$  Hz, 1H, C=CH), 4.75 (t,  $J = 8.5$ , 1H, CH), 3.89 (q,  $J = 7.4$  Hz, 1H, CH), 3.81 (q,  $J = 8.0$ , 7.6 Hz, 1H, CH), 2.40 (s, 3H, ArCH<sub>3</sub>), 2.33 (s, 3H, ArCH<sub>3</sub>), 2.15–2.10 (m, 1H, CH), 1.99–1.91 (m, 2H, CH<sub>2</sub>), 1.62–1.57 (m, 1H, CH<sub>2</sub>);  $^{13}\text{C NMR}$  (150 MHz,  $\text{CDCl}_3$ ):  $\delta = 166.1$ , 141.8, 138.1, 138.0, 133.5, 131.7, 131.3, 129.9, 129.9, 129.9, 129.9, 128.2, 128.2, 117.6, 117.6, 109.6, 94.1, 75.3, 68.1, 33.4, 26.4, 21.3, 20.8; **HRMS** (TOF ES<sup>+</sup>): m/z calcd for  $\text{C}_{23}\text{H}_{25}\text{N}_2\text{O}_2$ : [(M+H)<sup>+</sup>], 361.1911, found, 361.1913.

**(E)-1-(3,4-Dimethylphenyl)-3-((3,4-dimethylphenyl)amino)-5-((tetrahydrofuran-2-yl)methylene)-1,5-dihydro-2H-pyrrol-2-one (8c).**

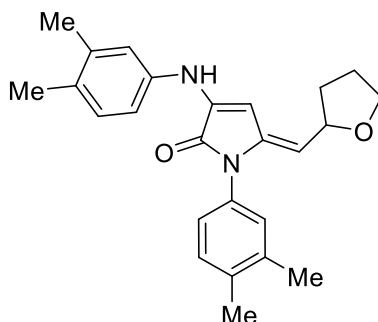

$V_{\text{Petroleum ether}}/V_{\text{Ethyl acetate}} = 7:1$ ,  $R_f = 0.2$ ; Yellow solid: 28 mg (56%), mp = 174–175 °C;  $^1\text{H NMR}$  (600 MHz,  $\text{CDCl}_3$ ):  $\delta = 7.23$  (d,  $J = 7.8$  Hz, 1H, ArH), 7.11 (d,  $J = 8.6$  Hz, 1H, ArH), 7.08 (s, 1H, ArH), 7.03 (d,  $J = 7.7$  Hz, 1H, ArH), 6.93 (d,  $J = 4.9$  Hz, 2H, ArH), 6.67 (s, 1H, NH), 6.41 (s, 1H, C=CH), 5.00 (d,  $J = 9.0$  Hz, 1H, C=CH), 4.75 (q,  $J = 8.2$  Hz, 1H, CH), 3.91–3.87 (m, 1H, CH<sub>2</sub>), 3.82 (q,  $J = 8.9$ , 8.0 Hz, 1H, CH<sub>2</sub>), 2.30–2.28 (m, 9H, ArCH<sub>3</sub>), 2.24 (s, 3H, ArCH<sub>3</sub>), 2.12 (dq,  $J = 12.4$ , 6.4 Hz, 1H, CH<sub>2</sub>), 1.96 (q,  $J = 7.4$  Hz, 2H, CH<sub>2</sub>), 1.61–1.57 (m, 1H, CH<sub>2</sub>);  $^{13}\text{C NMR}$  (150 MHz,  $\text{CDCl}_3$ ):  $\delta = 166.1$ , 141.9, 138.3, 137.8, 137.8, 136.9, 133.5, 131.5, 130.5, 130.4, 130.3, 129.4, 125.7, 119.1, 114.8, 109.5, 93.8, 75.3, 68.1, 33.4, 26.3, 20.1, 19.9, 19.6, 19.1; **HRMS** (TOF ES<sup>+</sup>): m/z calcd for  $\text{C}_{25}\text{H}_{29}\text{N}_2\text{O}_2$ : [(M+H)<sup>+</sup>], 389.2224, found, 389.2225.

**(E)-5-((Tetrahydrofuran-2-yl)methylene)-1-(o-tolyl)-3-(o-tolylamino)-1,5-dihydro-2H-pyrrol-2-one (8d).**

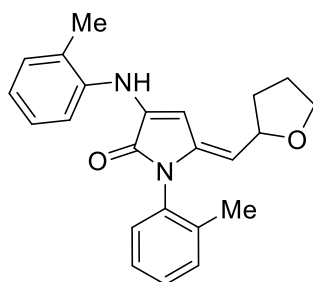

$V_{\text{Petroleum ether}}/V_{\text{Ethyl acetate}} = 8:1$ ,  $R_f = 0.2$ ; Yellow oli: 37 mg (52%);  $^1\text{H NMR}$  (600 MHz,  $\text{CDCl}_3$ ):  $\delta = 7.37$  (d,  $J = 7.9$  Hz, 2H, ArH), 7.34 (s, 2H, ArH), 7.24–7.21 (m, 2H, ArH), 7.17 (d,  $J = 7.6$  Hz, 1H, ArH), 6.99 (t,  $J = 7.3$  Hz, 1H, ArH), 6.57 (s, 1H, NH), 6.43 (s, 1H, C=CH), 4.79 (d,  $J = 9.0$  Hz, 1H, C=CH), 4.74–4.69 (m, 1H, CH), 3.93–3.85 (m, 1H, CH), 3.79 (m, 1H, CH), 2.34 (d, 6H, ArCH<sub>3</sub>), 2.19–2.14 (m, 2H, CH<sub>2</sub>), 1.98–1.83 (m, 1H, CH), 1.67–1.43 (m, 1H, CH);  $^{13}\text{C NMR}$  (150 MHz,  $\text{CDCl}_3$ ):  $\delta = 165.7$ , 141.2, 138.7, 137.7, 133.7, 132.8, 131.2, 130.9, 129.7, 129.4, 129.0, 127.0, 122.4, 122.4, 116.9, 109.8, 94.5, 75.2, 68.1, 33.5, 26.2, 17.7, 17.5; **HRMS** (TOF ES<sup>+</sup>):  $m/z$  calcd for  $\text{C}_{23}\text{H}_{25}\text{N}_2\text{O}_2$ :  $[(\text{M}+\text{H})^+]$ , 361.1911, found, 361.1917.

**(E)-1-(4-Fluorophenyl)-3-((4-fluorophenyl)amino)-5-((tetrahydrofuran-2-yl)methylene)-1,5-dihydro-2H-pyrrol-2-one (8e).**

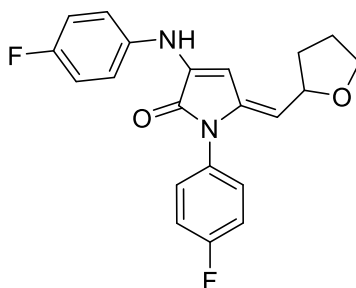

$V_{\text{Petroleum ether}}/V_{\text{Ethyl acetate}} = 8:1$ ,  $R_f = 0.2$ ; Yellow solid: 49 mg (67%), mp = 204–205 °C;  $^1\text{H NMR}$  (600 MHz,  $\text{CDCl}_3$ ):  $\delta = 7.29$  (dd,  $J = 8.7$ , 4.9 Hz, 2H, ArH), 7.19 (d,  $J = 8.4$  Hz, 2H, ArH), 7.12 (dd,  $J = 8.9$ , 4.5 Hz, 2H, ArH), 7.05 (t,  $J = 8.5$  Hz, 2H, ArH), 6.80 (s, 1H, NH), 6.43 (s, 1H, C=CH), 5.01 (d,  $J = 8.9$  Hz, 1H, C=CH), 4.73 (q,  $J = 8.3$  Hz, 1H, CH), 3.90 (q,  $J = 7.2$  Hz, 1H, CH<sub>2</sub>), 3.82 (q,  $J = 7.8$  Hz, 1H, CH<sub>2</sub>), 2.14 (dq,  $J = 12.2$ , 6.8 Hz, 1H, CH<sub>2</sub>), 1.97 (dt,  $J = 10.3$ , 7.0 Hz, 2H, CH<sub>2</sub>), 1.64–1.59 (m, 1H, CH<sub>2</sub>);  $^{13}\text{C NMR}$  (150 MHz,  $\text{CDCl}_3$ ):  $\delta = 165.9$ , 162.13 (d,  $J = 248.2$  Hz), 158.19 (d,  $J = 242.1$  Hz), 141.48, 136.59, 136.58, 133.53, 130.17 (d,  $J = 8.6$  Hz), 130.17 (d,  $J = 8.6$  Hz), 129.78 (d,  $J = 3.1$  Hz), 119.13 (d,  $J = 7.8$  Hz), 119.13 (d,  $J = 7.8$  Hz), 116.30 (d,  $J = 47.1$  Hz), 116.30 (d,  $J = 47.1$  Hz), 116.30 (d,  $J = 47.1$  Hz), 110.09, 94.27, 75.1, 68.21, 33.44, 26.34; **HRMS** (TOF ES<sup>+</sup>):  $m/z$  calcd for  $\text{C}_{21}\text{H}_{19}\text{F}_2\text{N}_2\text{O}_2$ :  $[(\text{M}+\text{H})^+]$ , 369.1409, found, 369.1413.

**(E)-1-(4-Chlorophenyl)-3-((4-chlorophenyl)amino)-5-((tetrahydrofuran-2-yl)methylene)-1,5-dihydro-2H-pyrrol-2-one (8f).**



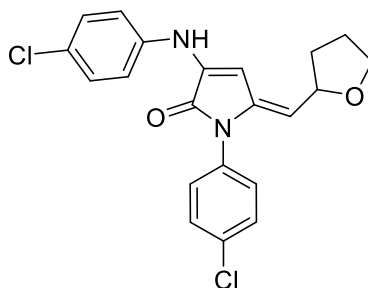

$V_{\text{Petroleum ether}}/V_{\text{Ethyl acetate}} = 8:1$ ,  $R_f = 0.2$ ; Yellow solid: 51 mg (64%), mp = 226–227 °C;  $^1\text{H NMR}$  (600 MHz,  $\text{CDCl}_3$ ):  $\delta = 7.47$  (d,  $J = 8.3$  Hz, 2H, ArH), 7.31 (d,  $J = 8.4$  Hz, 2H, ArH), 7.26 (d,  $J = 7.3$  Hz, 2H, ArH), 7.09 (d,  $J = 8.1$  Hz, 2H, ArH), 6.82 (s, 1H, NH), 6.49 (s, 1H, C=CH), 5.07 (d,  $J = 8.8$  Hz, 1H, C=CH), 4.75 (q,  $J = 7.8$  Hz, 1H, CH), 3.93–3.82 (m, 2H,  $\text{CH}_2$ ), 2.15 (dt,  $J = 12.4$ , 6.3 Hz, 1H,  $\text{CH}_2$ ), 1.98 (q,  $J = 8.3$ , 7.7 Hz, 2H,  $\text{CH}_2$ ), 1.64 (d,  $J = 9.2$  Hz, 1H,  $\text{CH}_2$ );  $^{13}\text{C NMR}$  (150 MHz,  $\text{CDCl}_3$ ):  $\delta = 165.6$ , 140.9, 138.9, 134.1, 132.8, 132.3, 129.7, 129.6, 129.6, 129.5, 129.5, 129.5, 127.1, 118.6, 118.6, 110.7, 95.5, 75.0, 68.2, 33.4, 26.3; **HRMS** (TOF ES<sup>+</sup>):  $m/z$  calcd for  $\text{C}_{21}\text{H}_{19}\text{Cl}_2\text{N}_2\text{O}_2$ :  $[(\text{M}+\text{H})^+]$ , 401.0818, found, 401.0820.

**(E)-1-(3-Bromophenyl)-3-((3-bromophenyl)amino)-5-((tetrahydrofuran-2-yl)methylene)-1,5-dihydro-2H-pyrrol-2-one (8g).**

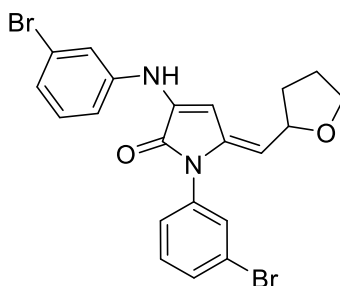

$V_{\text{Petroleum ether}}/V_{\text{Ethyl acetate}} = 7:1$ ,  $R_f = 0.2$ ; Yellow solid: 37 mg (37%), mp = 156–157 °C;  $^1\text{H NMR}$  (600 MHz,  $\text{CDCl}_3$ ):  $\delta = 7.56$  (d,  $J = 7.9$  Hz, 1H, ArH), 7.49 (s, 1H, ArH), 7.37 (t,  $J = 8.0$  Hz, 1H, ArH), 7.31 (s, 1H, ArH), 7.21 (t,  $J = 8.0$  Hz, 1H, ArH), 7.15 (d,  $J = 7.8$  Hz, 1H, ArH), 7.07 (d,  $J = 7.9$  Hz, 1H, ArH), 6.85 (s, 1H, NH), 6.53 (s, 1H, C=CH), 5.10 (d,  $J = 8.8$  Hz, 1H, C=CH), 4.76 (q,  $J = 8.2$  Hz, 1H, CH), 3.93 (q,  $J = 7.3$  Hz, 1H,  $\text{CH}_2$ ), 3.85 (q,  $J = 7.4$  Hz, 1H,  $\text{CH}_2$ ), 2.17 (dq,  $J = 12.4$ , 6.3 Hz, 1H,  $\text{CH}_2$ ), 2.00 (q,  $J = 7.4$  Hz, 2H,  $\text{CH}_2$ ), 1.67–1.64 (m, 1H,  $\text{CH}_2$ );  $^{13}\text{C NMR}$  (150 MHz,  $\text{CDCl}_3$ ):  $\delta = 165.4$ , 141.7, 140.7, 135.1, 132.4, 131.5, 131.4, 130.8, 130.6, 127.1, 125.1, 123.2, 122.7, 120.0, 116.0, 111.1, 96.2, 75.0, 68.3, 33.4, 26.3; **HRMS** (TOF ES<sup>+</sup>):  $m/z$  calcd for  $\text{C}_{21}\text{H}_{18}\text{Br}_2\text{N}_2\text{O}_2\text{Na}$ :  $[(\text{M}+\text{Na})^+]$ , 510.9627, found, 510.9630.

**(E)-4-Methyl-1-phenyl-3-(phenylamino)-5-((tetrahydrofuran-2-yl)methylene)-1,5-dihydro-2H-pyrrol-2-one (8h).**

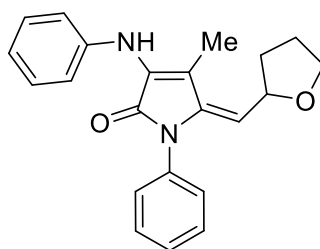

$V_{\text{Petroleum ether}}/V_{\text{Ethyl acetate}} = 6:1$ ,  $R_f = 0.2$ ; Yellow solid: 42 mg (61%),  $E/Z = 1/1$ , mp = 189–190 °C; **Major:  $^1\text{H NMR}$**  (600 MHz,  $\text{CDCl}_3$ ):  $\delta = 7.49$  (d,  $J = 7.6$  Hz, 3H, ArH), 7.42 (q,  $J = 7.5$  Hz, 3H, ArH) (minor), 7.30 (d,  $J = 7.3$  Hz, 4H, ArH), 7.03–6.98 (m, 2H, ArH) (minor), 6.95–6.93 (m, 3H, ArH), 6.06 (s, 1H, NH), 5.18 (d,  $J = 9.0$  Hz, 1H, C=CH), 5.14 (d,  $J = 9.2$  Hz, 1H, ArH) (minor), 5.01 (q,  $J = 7.9$  Hz, 1H, CH), 3.90 (q,  $J = 7.0$  Hz, 2H,  $\text{CH}_2$ ), 3.85–3.78 (m, 2H, ArH) (minor), 3.50 (q,  $J = 7.4$  Hz, 1H,  $\text{CH}_2$ ) (minor), 2.20–2.17 (m, 1H,  $\text{CH}_2$ ) (minor), 2.09 (s, 3H,  $\text{CH}_3$ ) (minor), 1.99–1.91 (m, 2H,  $\text{CH}_2$ ), 1.91 (s, 3H,  $\text{CH}_3$ ), 1.88–1.82 (m, 1H,  $\text{CH}_2$ ) (minor), 1.66–1.63 (m, 2H,  $\text{CH}_2$ ), 1.50–1.45 (m, 1H,  $\text{CH}_2$ ) (minor);  **$^{13}\text{C NMR}$**  (150 MHz,  $\text{CDCl}_3$ ):  $\delta = 167.9$  (minor), 165.8, 142.1 (minor), 141.4, 140.1 (minor), 136.9, 134.3 (minor), 132.3, 129.4, 129.4, 129.2 (minor), 128.4 (minor), 128.9, 128.9, 128.9, 128.9, 128.9, 128.1 (minor), 121.7, 118.9 (minor), 118.8, 118.8, 117.5 (minor), 114.1 (minor), 113.5, 110.9, 73.9 (minor), 73.6, 68.1 (minor), 67.8, 33.7 (minor), 33.0, 26.3 (minor), 26.1, 14.8 (minor), 11.5; **HRMS** (TOF ES+): m/z calcd for  $\text{C}_{22}\text{H}_{23}\text{N}_2\text{O}_2$ :  $[(\text{M}+\text{H})^+]$ , 347.1754, found, 347.1758.

**(E)-5-((Tetrahydro-2H-pyran-2-yl)methylene)-1-(p-tolyl)-3-(p-tolylamino)-1,5-dihydro-2H-pyrrol-2-one (8i).**

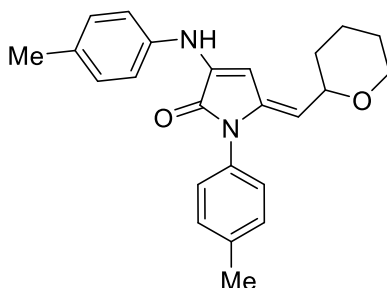

$V_{\text{Petroleum ether}}/V_{\text{Ethyl acetate}} = 7:1$ ,  $R_f = 0.2$ ; Yellow solid: 26 mg (36%), mp = 191–192 °C;  **$^1\text{H NMR}$**  (600 MHz,  $\text{CDCl}_3$ ):  $\delta = 7.29$ –7.27 (m, 2H, ArH), 7.17 (dd,  $J = 8.2, 2.8$  Hz, 4H, ArH), 7.07 (d,  $J = 8.3$  Hz, 2H, ArH), 6.77 (s, 1H, NH), 6.38 (s, 1H, C=CH), 5.03 (d,  $J = 8.6$  Hz, 1H, C=CH), 4.24 (td,  $J = 11.0, 8.5, 2.3$  Hz, 1H, CH), 4.04–4.00 (m, 1H,  $\text{CH}_2$ ), 3.56 (td,  $J = 11.2, 3.1$  Hz, 1H,  $\text{CH}_2$ ), 2.40 (s, 3H, Ar $\text{CH}_3$ ), 2.34 (s, 3H Ar $\text{CH}_3$ ), 1.86 (t,  $J = 9.3$  Hz, 1H,  $\text{CH}_2$ ), 1.70–1.68 (m, 1H,  $\text{CH}_2$ ), 1.63 (d,  $J = 13.8$  Hz, 1H, ArH), 1.60–1.53 (m, 3H,  $\text{CH}_2$ ), 1.46–1.41 (m, 1H,  $\text{CH}_2$ );  **$^{13}\text{C NMR}$**  (150 MHz,  $\text{CDCl}_3$ ):  $\delta = 166.1, 141.4, 138.1, 133.6, 131.7, 131.3, 130.0, 130.0, 129.9, 129.9, 128.2, 128.2, 128.2, 117.6, 117.6, 110.2, 94.0, 74.3, 68.4, 33.0, 25.6, 23.4, 21.3, 20.8$ ; **HRMS** (TOF ES+): m/z calcd for  $\text{C}_{24}\text{H}_{28}\text{N}_2\text{O}_2$ :  $[(\text{M}+\text{H})^+]$ , 375.2067, found, 375.2073.

**(E)-5-((1,4-dioxan-2-yl)methylene)-1-(p-tolyl)-3-(p-tolylamino)-1,5-dihydro-2H-pyrrol-2-one (8j).**

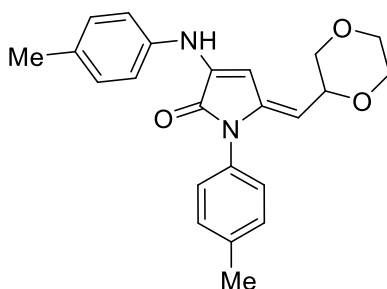

$V_{\text{Petroleum ether}}/V_{\text{Ethyl acetate}} = 10:1$ ,  $R_f = 0.2$ ; Yellow solid: 30 mg (40%), mp = 181–182 °C;  **$^1\text{H NMR}$**  (600 MHz,  $\text{CDCl}_3$ ):  $\delta = 7.28$  (d,  $J = 8.2$  Hz, 2H, ArH), 7.18 (dd,  $J = 14.1, 7.9$  Hz, 4H, ArH), 7.07

(d,  $J = 7.9$  Hz, 2H, ArH), 6.78 (s, 1H, NH), 6.36 (s, 1H, C=CH), 4.86 (d,  $J = 8.8$  Hz, 1H, C=CH), 4.51 (td,  $J = 9.4, 2.8$  Hz, 1H, CH), 3.87–3.81 (m, 2H, CH<sub>2</sub>), 3.72 (td,  $J = 9.6, 8.7, 5.2$  Hz, 2H, CH<sub>2</sub>), 3.61 (td,  $J = 11.8, 9.9, 4.0$  Hz, 1H, CH<sub>2</sub>), 3.38–3.34 (m, 1H, CH<sub>2</sub>), 2.40 (s, 3H, ArCH<sub>3</sub>), 2.35 (s, 3H, ArCH<sub>3</sub>); <sup>13</sup>C NMR (150 MHz, CDCl<sub>3</sub>):  $\delta = 165.9, 143.5, 138.3, 137.7, 133.9, 132.0, 130.9, 130.0, 130.0, 130.0, 128.1, 128.1, 117.7, 117.7, 103.7, 93.4, 72.5, 70.9, 66.5, 66.1, 21.2, 20.8$ ; HRMS (TOF ES<sup>+</sup>):  $m/z$  calcd for C<sub>23</sub>H<sub>25</sub>N<sub>2</sub>O<sub>3</sub>: [(M+H)<sup>+</sup>], 377.1860, found, 377.1863.

**(E)-5-((4-methylmorpholin-2-yl)methylene)-1-(p-tolyl)-3-(p-tolylamino)-1,5-dihydro-2H-pyrr-ol-2-one (8k).**

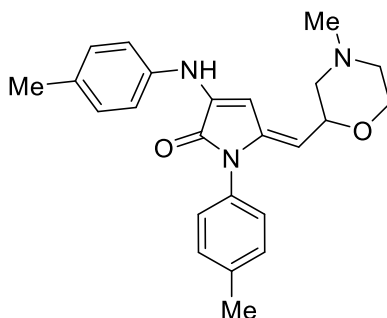

V<sub>Petroleum ether</sub>/V<sub>Ethyl acetate</sub> = 2:1, R<sub>f</sub> = 0.2; Yellow solid: 30 mg (41%), mp = 211–213 °C; <sup>1</sup>H NMR (600 MHz, CDCl<sub>3</sub>):  $\delta = 7.27$  (s, 2H, ArH), 7.19 (d,  $J = 7.3$  Hz, 2H, ArH), 7.15 (d,  $J = 7.6$  Hz, 2H, ArH), 7.06 (d,  $J = 7.4$  Hz, 2H, ArH), 6.77 (s, 1H, NH), 6.37 (s, 1H, C=CH), 4.80 (d,  $J = 9.6$  Hz, 1H, C=CH), 3.86 (d,  $J = 11.5$  Hz, 1H, CH), 3.72 (s, 1H, CH), 3.63 (t,  $J = 11.4$  Hz, 1H, CH), 3.26–3.23 (m, 1H, CH), 3.05 (t,  $J = 10.0$  Hz, 1H, CH), 2.76 (d,  $J = 11.9$  Hz, 1H, CH), 2.48 (s, 1H, CH), 2.40 (s, 3H, ArCH<sub>3</sub>), 2.35 (s, 3H, ArCH<sub>3</sub>), 2.25 (s, 3H, CH<sub>3</sub>); <sup>13</sup>C NMR (150 MHz, CDCl<sub>3</sub>):  $\delta = 165.4, 142.3, 137.7, 137.6$  (minor), 137.5 (minor), 137.4, 133.2, 131.4, 130.6, 129.6, 129.5, 127.6 (minor), 127.5, 127.5, 117.1, 117.1, 117.0 (minor), 106.2, 93.0, 70.6, 66.7, 66.5 (minor), 60.8, 55.1, 54.4, 53.2, 43.5, 20.7, 20.3; HRMS (TOF ES<sup>+</sup>):  $m/z$  calcd for C<sub>24</sub>H<sub>28</sub>N<sub>3</sub>O<sub>3</sub>: [(M+H)<sup>+</sup>], 390.2176, found, 390.2179.

**(E)-1-Phenyl-3-(phenylamino)-5-(((trifluoromethyl)sulfonyl)methylene)-1,5-dihydro-2H-pyrr-ol-2-one (9).**

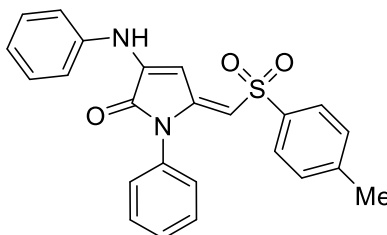

V<sub>Petroleum ether</sub>/V<sub>Ethyl acetate</sub> = 8:1, R<sub>f</sub> = 0.2; Yellow solid: 39 mg (37%), mp = 234–235 °C; <sup>1</sup>H NMR (600 MHz, DMSO-*d*<sub>6</sub>):  $\delta = 9.57$  (s, 1H, NH), 7.77 (d,  $J = 8.3$  Hz, 2H, ArH), 7.54 (t,  $J = 7.5$  Hz, 2H, ArH), 7.49 (d,  $J = 7.0$  Hz, 1H, ArH), 7.46 (d,  $J = 7.6$  Hz, 2H, ArH), 7.41 (t,  $J = 7.5$  Hz, 4H, ArH), 7.32 (d,  $J = 7.2$  Hz, 2H, ArH), 7.12 (t,  $J = 7.2$  Hz, 1H, ArH), 7.00 (s, 1H, C=CH), 5.48 (s, 1H, C=CH), 2.37 (s, 3H, ArCH<sub>3</sub>); <sup>13</sup>C NMR (150 MHz, DMSO-*d*<sub>6</sub>):  $\delta = 165.4, 152.0, 144.2, 140.5, 140.3, 137.8, 133.1, 130.5, 130.5, 130.2, 130.2, 129.9, 129.9, 129.5, 129.0, 129.0, 127.0, 127.0, 123.8, 119.6, 119.6, 104.2, 91.7, 21.5$ ; HRMS (TOF ES<sup>+</sup>):  $m/z$  calcd for C<sub>24</sub>H<sub>21</sub>N<sub>2</sub>O<sub>3</sub>S: [(M+H)<sup>+</sup>], 417.1267, found, 417.1270.

**(E)-1-Phenyl-3-(phenylamino)-5-(((trifluoromethyl)sulfonyl)methylene)-1,5-dihydro-2H-pyrrol-2-one (10).**

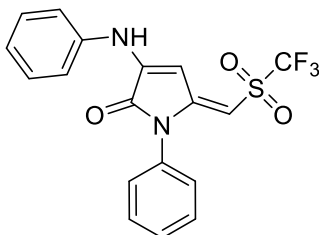

$V_{\text{Petroleum ether}}/V_{\text{Ethyl acetate}} = 8:1$ ,  $R_f = 0.2$ ; Yellow solid: 59 mg (15%), mp = 225–226 °C;  $^1\text{H NMR}$  (600 MHz, DMSO- $d_6$ ):  $\delta = 10.19$  (s, 1H, NH), 7.60 (t,  $J = 7.5$  Hz, 2H, ArH), 7.55 (t,  $J = 7.3$  Hz, 1H, ArH), 7.49 (d,  $J = 7.8$  Hz, 1H, ArH), 7.46 (d,  $J = 6.8$  Hz, 2H, ArH), 7.40 (d,  $J = 8.0$  Hz, 2H, ArH), 7.19 (t,  $J = 7.4$  Hz, 1H, ArH), 6.64 (s, 1H, C=CH), 5.16 (s, 1H, C=CH);  $^{13}\text{C NMR}$  (150 MHz, DMSO- $d_6$ ):  $\delta = 165.4, 162.7, 140.6, 139.6, 132.5, 130.4, 130.4, 130.1, 130.1, 130.0, 129.1, 129.1, 125.0, 120.5, 120.5, 120.3$  (d,  $J = 325.7$  Hz), 89.5, 87.5; **HRMS** (TOF ES+): m/z calcd for  $\text{C}_{18}\text{H}_{14}\text{F}_3\text{N}_2\text{O}_3\text{S}$ : [(M+H) $^+$ ], 395.0672, found, 395.0672.

**4-Thiocyanatoaniline (11)**

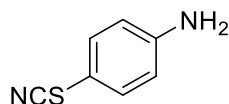

$V_{\text{Petroleum ether}}/V_{\text{Ethyl acetate}} = 3:1$ ,  $R_f = 0.2$ ; Yellow oli: 40 mg (67%);  $^1\text{H NMR}$  (600 MHz,  $\text{CDCl}_3$ ):  $\delta = 7.36$  (d,  $J = 8.5$  Hz, 2H, ArH), 6.68 (d,  $J = 8.5$  Hz, 2H, ArH), 3.94 (s, 2H,  $\text{NH}_2$ );  $^{13}\text{C NMR}$  (150 MHz,  $\text{CDCl}_3$ ):  $\delta = 148.8, 134.6, 134.6, 116.1, 116.1, 112.4, 109.6$ ; **HRMS** (TOF ES+): m/z calcd for  $\text{C}_7\text{H}_7\text{N}_2$ : [(M+H) $^+$ ], 151.0324, found, 151.0330.

**N-(p-Tolyl)acetamide (12)**

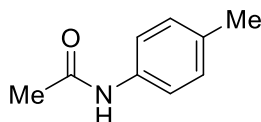

$V_{\text{Petroleum ether}}/V_{\text{Ethyl acetate}} = 5:1$ ,  $R_f = 0.2$ ; White solid: 39 mg (60%), mp = 135–136 °C;  $^1\text{H NMR}$  (600 MHz, DMSO- $d_6$ ):  $\delta = 9.85$  (s, 1H, NH), 7.45 (d,  $J = 8.5$  Hz, 2H, ArH), 7.08 (d,  $J = 8.2$  Hz, 2H, ArH), 2.24 (s, 3H, Ar $\text{CH}_3$ ), 2.01 (s, 3H,  $\text{CH}_3$ );  $^{13}\text{C NMR}$  (150 MHz, DMSO- $d_6$ ):  $\delta = 168.5, 137.3, 132.3, 129.5, 129.5, 119.4, 119.4, 24.4, 20.9$ ; **HRMS** (TOF ES+): m/z calcd for  $\text{C}_9\text{H}_{12}\text{NO}$ : [(M+H) $^+$ ], 150.0913, found, 150.0908.

**(E)-5-(((Diphenylphosphoryl)methylene)-1-(p-tolyl)-3-(p-tolylamino)-1,5-dihydro-2H-pyrrol-2-one (13).**

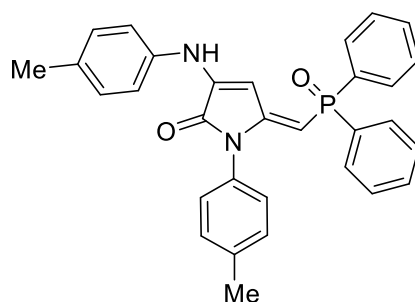

$V_{\text{Petroleum ether}}/V_{\text{Ethyl acetate}} = 2:1$ ,  $R_f = 0.2$ ; Yellow solid: 70 mg (76%), mp = 117–118 °C;  $^1\text{H NMR}$  (600 MHz, Chloroform-*d*)  $\delta = 7.69$  (dd,  $J = 12.3, 7.7$  Hz, 4H, ArH), 7.51 (t,  $J = 7.5$  Hz, 2H, ArH), 7.46 (d,  $J = 7.1$  Hz, 4H, ArH), 7.30 (d,  $J = 7.9$  Hz, 2H, ArH), 7.19 (d,  $J = 8.4$  Hz, 2H, ArH), 7.11 (d,  $J = 7.9$  Hz, 2H, ArH), 6.98 (d,  $J = 8.5$  Hz, 2H, ArH), 6.92 (s, 1H, NH), 6.87 (s, 1H, C=CH), 5.34 (d,  $J = 15.7$  Hz, 1H, C=CH), 2.41 (s, 3H, ArCH<sub>3</sub>), 2.31 (s, 3H, ArCH<sub>3</sub>);  $^{13}\text{C NMR}$  (150 MHz, CDCl<sub>3</sub>)  $\delta = 166.1, 154.7$  (d,  $J = 10.9$  Hz), 138.8, 136.9, 134.9 (d,  $J = 15.0$  Hz), 134.2, 132.5, 131.7 (d,  $J = 2.8$  Hz), 131.7 (d,  $J = 2.8$  Hz), 131.7, 131.1 (d,  $J = 10.0$  Hz), 131.1 (d,  $J = 10.0$  Hz), 130.4 (d,  $J = 14.3$  Hz), 130.3, 130.1, 130.1, 130.1, 128.7, 128.6, 128.1, 128.1, 117.8, 117.8, 95.4, 95.1 (d,  $J = 5.4$  Hz), 95.1 (d,  $J = 111.8$  Hz), 94.7, 21.3, 20.8; **HRMS** (TOF ES+):  $m/z$  calcd for C<sub>29</sub>H<sub>24</sub>N<sub>2</sub>O<sub>2</sub>P: [(M+H)<sup>+</sup>], 491.1883, found, 491.1891.

**(E)-5-(Thiocyanatomethylene)-1-(p-tolyl)-3-(p-tolylamino)-1,5-dihydro-2H-pyrrol-2-one (14).**

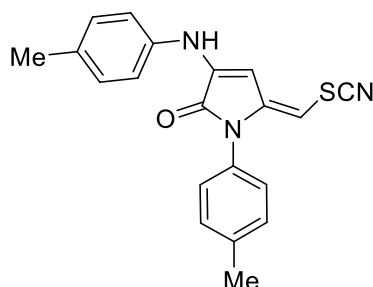

$V_{\text{Petroleum ether}}/V_{\text{Ethyl acetate}} = 10:1$ ,  $R_f = 0.2$ ; Yellow solid: 46 mg (67%), mp = 203–204 °C;  $^1\text{H NMR}$  (600 MHz, Chloroform-*d*)  $\delta = 7.731$  (d,  $J = 7.9$  Hz, 2H, ArH), 7.21 (d,  $J = 8.1$  Hz, 2H, ArH), 7.16 (d,  $J = 7.9$  Hz, 2H, ArH), 7.10 (d,  $J = 8.1$  Hz, 2H, ArH), 7.03 (s, 1H, NH), 6.48 (s, 1H, C=CH), 5.33 (s, 1H, C=CH), 2.43 (s, 3H, ArCH<sub>3</sub>), 2.36 (s, 3H, ArCH<sub>3</sub>);  $^{13}\text{C NMR}$  (150 MHz, CDCl<sub>3</sub>)  $\delta = 166.2, 151.8, 139.1, 136.8, 135.5, 133.2, 133.2, 130.3, 130.3, 130.2, 129.9, 127.7, 127.7, 118.3, 118.3, 111.2, 92.0, 84.4, 21.2, 20.9$ ; **HRMS** (TOF ES+):  $m/z$  calcd for C<sub>20</sub>H<sub>18</sub>N<sub>3</sub>OS: [(M+H)<sup>+</sup>], 348.1165, found, 348.1170.

**(E)-5-(2-Oxo-2-phenylethylidene)-1-(p-tolyl)-3-(p-tolylamino)-1,5-dihydro-2H-pyrrol-2-one (15).**

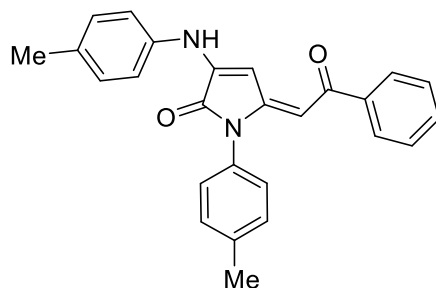

$V_{\text{Petroleum ether}}/V_{\text{Ethyl acetate}} = 10:1$ ,  $R_f = 0.2$ ; Yellow solid: 46 mg (21%), E/Z = 10/1, mp = 125–126 °C; **Major:**  $^1\text{H NMR}$  (600 MHz,  $\text{CDCl}_3$ )  $\delta = 77.87$  (d,  $J = 7.3$  Hz, 2H, ArH), 7.80 (d,  $J = 7.5$  Hz, 2H, ArH), 7.76 (s, 1H, NH), 7.50 (d,  $J = 7.3$  Hz, 2H, ArH), 7.48 (s, 1H, ArH, minor), 7.42 (t,  $J = 7.4$  Hz, 2H, ArH), 7.36 (d, 1H,  $J = 7.3$  Hz, ArH), 7.20 (d, 2H,  $J = 7.1$  Hz, ArH, minor), 7.19–7.18 (m, 2H, ArH), 7.04 (s, 1H, C=CH), 6.35 (s, 1H, C=CH), 2.46 (s, 3H, ArCH<sub>3</sub>), 2.36 (s, 3H, ArCH<sub>3</sub>);  $^{13}\text{C NMR}$  (150 MHz,  $\text{CDCl}_3$ )  $\delta = 190.1$ , 166.7, 165.6 (minor), 154.9, 139.6, 138.9, 136.8, 136.7, 135.3, 135.1 (minor), 134.3, 133.2, 132.3, 131.8, 130.5 (minor), 130.3, 130.2, 129.6, 128.8, 128.5, 128.0, 127.8, 126.9, 120.2, 118.2, 100.4, 95.5, 21.3, 20.9; **HRMS** (TOF ES<sup>+</sup>): m/z calcd for  $\text{C}_{26}\text{H}_{23}\text{N}_2\text{O}$ : [(M+H)<sup>+</sup>], 395.1754, found, 395.1760.

**4-Benzyl-3-(benzyl(*p*-tolyl)amino)-5-methylene-1-(*p*-tolyl)-1,5-dihydro-2*H*-pyrrol-2-one (16).**

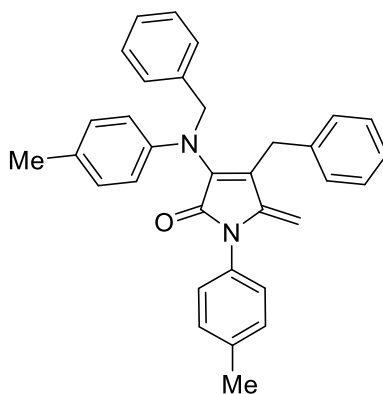

$V_{\text{Petroleum ether}}/V_{\text{Ethyl acetate}} = 15:1$ ,  $R_f = 0.2$ ; Yellow oli: 47 mg (51%);  $^1\text{H NMR}$  (600 MHz,  $\text{CDCl}_3$ )  $\delta = 7.25$  (d,  $J = 6.6$  Hz, 5H, ArH), 7.20 (d,  $J = 8.1$  Hz, 3H, ArH), 7.18 (d,  $J = 6.4$  Hz, 4H), 6.96 (dd,  $J = 11.4$ , 8.0 Hz, 4H, ArH), 6.77 (d,  $J = 8.3$  Hz, 2H, ArH), 5.08 (s, 2H, CH<sub>2</sub>), 4.71 (d,  $J = 3.6$  Hz, 2H, C=CH), 3.63 (s, 2H, CH<sub>2</sub>), 2.38 (s, 3H, ArCH<sub>3</sub>), 2.24 (s, 3H, ArCH<sub>3</sub>);  $^{13}\text{C NMR}$  (150 MHz,  $\text{CDCl}_3$ )  $\delta = 166.4$ , 145.3, 144.0, 139.1, 138.6, 137.5, 136.0, 131.7, 130.8, 129.9, 129.8, 129.7, 129.7, 129.5, 128.8, 128.4, 128.4, 128.4, 128.4, 127.9, 127.9, 127.7, 127.7, 126.9, 126.6, 126.2, 119.1, 117.9, 94.0, 54.3, 30.8, 21.27, 20.6; **HRMS** (TOF ES<sup>+</sup>): m/z calcd for  $\text{C}_{33}\text{H}_{31}\text{N}_2\text{O}$ : [(M+H)<sup>+</sup>], 471.2431, found, 471.2437.

**5-Methyl-1-(*p*-tolyl)-3-(*p*-tolylamino)pyrrolidin-2-one (17).**

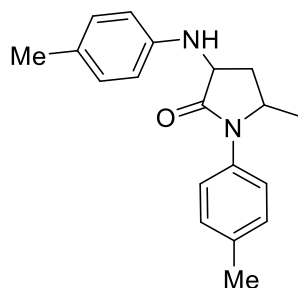

$V_{\text{Petroleum ether}}/V_{\text{Ethyl acetate}} = 8:1$ ,  $R_f = 0.2$ ; Yellow solid: 40 mg (68%) mp = 147–148 °C;  $^1\text{H NMR}$  (600 MHz,  $\text{CDCl}_3$ )  $\delta = 7.21$  (d,  $J = 4.8$  Hz, 4H, ArH), 7.03 (d,  $J = 8.1$  Hz, 2H, ArH), 6.64 (d,  $J = 8.2$  Hz, 2H, ArH), 4.55 (s, 1H, NH), 4.23 – 4.20 (m, 1H, CH), 4.06 – 4.03 (m, 1H, CH), 3.05 – 3.01 (m, 1H, CH), 2.36 (s, 3H, ArCH<sub>3</sub>), 2.26 (s, 3H, ArCH<sub>3</sub>), 1.63 (q,  $J = 11.9$  Hz, 1H, CH), 1.21 (s, 3H, CH<sub>3</sub>);  $^{13}\text{C NMR}$  (150 MHz,  $\text{CDCl}_3$ )  $\delta = 172.7$ , 145.3, 136.4, 134.1, 129.8, 129.8, 129.7, 129.7, 127.7, 124.7, 124.7, 113.9, 113.9, 55.8, 52.2, 38.6, 21.1, 20.5, 20.4; **HRMS** (TOF ES<sup>+</sup>): m/z calcd for  $\text{C}_{19}\text{H}_{23}\text{N}_2\text{O}$ : [(M+H)<sup>+</sup>], 295.1805, found, 295.1815.

**6-Methyl-4-(p-tolylamino)pyridazin-3(2H)-one (18).**

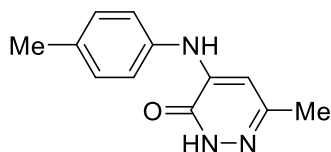

$V_{\text{Petroleum ether}}/V_{\text{Ethyl acetate}} = 3:1$ ,  $R_f = 0.2$ ; White solid: 40 mg (78%) mp = 234–235 °C;  $^1\text{H NMR}$   $^1\text{H NMR}$  (600 MHz,  $\text{CD}_3\text{OD}$ )  $\delta = 7.57$  (d,  $J = 8.2$  Hz, 2H, ArH), 7.17 (d,  $J = 8.1$  Hz, 2H, ArH), 6.58 (s, 1H, C=CH), 2.37 (s, 3H, ArCH<sub>3</sub>), 2.33 (s, 3H, CH<sub>3</sub>);  $^{13}\text{C NMR}$  (150 MHz,  $\text{CD}_3\text{OD}$ )  $\delta = 161.6$ , 146.9, 140.8, 135.4, 133.7, 128.9, 128.9, 120.2, 120.2, 104.2, 19.53, 9.1; **HRMS** (TOF ES<sup>+</sup>): m/z calcd for  $\text{C}_{12}\text{H}_{14}\text{N}_3\text{O}$ : [(M+H)<sup>+</sup>], 216.1131, found, 216.1140.

5. (1) X-ray Structure and Data<sup>3</sup> of 4b (CCDC 2226645) .

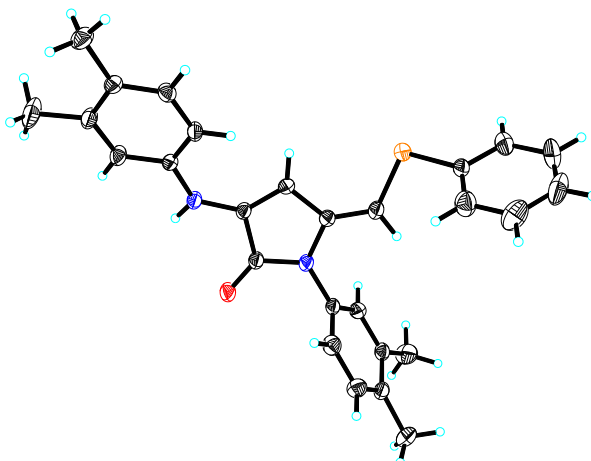

Figure S1 X-Ray crystal structure of 4b.

Table S4 Crystal data and structure refinement for 4b.

|                                   |                                                   |                        |
|-----------------------------------|---------------------------------------------------|------------------------|
| Empirical formula                 | C <sub>27</sub> H <sub>26</sub> N <sub>2</sub> OS |                        |
| Formula weight                    | 426.56                                            |                        |
| Temperature                       | 296 K                                             |                        |
| Wavelength                        | 0.71073 Å                                         |                        |
| Crystal system, space group       | monoclinic, P 2 <sub>1</sub> /c                   |                        |
| Unit cell dimensions              | a = 11.2145(17) Å                                 | alpha = 90 deg.        |
|                                   | b = 22.855(4) Å                                   | beta = 105.549(3) deg. |
|                                   | c = 9.3203(14) Å                                  | gamma = 90 deg.        |
| Volume                            | 2301.4(6) Å <sup>3</sup>                          |                        |
| Z, Calculated density             | 4, 1.231 Mg/m <sup>3</sup>                        |                        |
| Absorption coefficient            | 0.162 mm <sup>-1</sup>                            |                        |
| F(000)                            | 904                                               |                        |
| Theta range for data collection   | 5.188 to 55.192 deg.                              |                        |
| Limiting indices                  | -14 ≤ h ≤ 14, -29 ≤ k ≤ 28, -12 ≤ l ≤ 9           |                        |
| Completeness to theta = 25.242    | 99.8%                                             |                        |
| Absorption correction             | Multi-scan                                        |                        |
| Refinement method                 | SHELXL-2018/3 (Sheldrick 2015)                    |                        |
| Data/restraints/parameters        | 5210 / 0 / 284                                    |                        |
| Goodness-of-fit on F <sup>2</sup> | 1.043                                             |                        |
| Final R indices [I > 2σ(I)]       | R1 = 0.0552, wR2 = 0.1101                         |                        |
| R indices (all data)              | R1 = 0.1013, wR2 = 0.1301                         |                        |
| Largest diff. peak and hole       | 0.27 and -0.35 e.Å <sup>-3</sup>                  |                        |



(2) X-ray Structure and Data<sup>3</sup> of 7b (CCDC 2226644) .

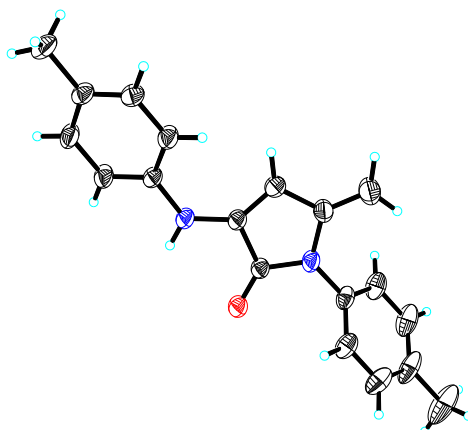

Figure S2 X-Ray crystal structure of 7b.

Table S5 Crystal data and structure refinement for 7b.

|                                   |                                                                                                                            |
|-----------------------------------|----------------------------------------------------------------------------------------------------------------------------|
| Empirical formula                 | C <sub>19</sub> H <sub>18</sub> N <sub>2</sub> O                                                                           |
| Formula weight                    | 290.35                                                                                                                     |
| Temperature                       | 296 K                                                                                                                      |
| Wavelength                        | 0.71073 Å                                                                                                                  |
| Crystal system, space group       | monoclinic, P 2 <sub>1</sub> /c                                                                                            |
| Unit cell dimensions              | a = 11.578(6) Å      alpha = 90 deg.<br>b = 10.373(5) Å      beta = 92.346(9) deg.<br>c = 13.434(6) Å      gamma = 90 deg. |
| Volume                            | 1612.0(13) Å <sup>3</sup>                                                                                                  |
| Z, Calculated density             | 4, 1.196 Mg/m <sup>3</sup>                                                                                                 |
| Absorption coefficient            | 0.075 mm <sup>-1</sup>                                                                                                     |
| F(000)                            | 616.0                                                                                                                      |
| Theta range for data collection   | 5.274 to 55.24 deg.                                                                                                        |
| Limiting indices                  | -14 ≤ h ≤ 14, -9 ≤ k ≤ 13, -14 ≤ l ≤ 17                                                                                    |
| Completeness to theta = 25.242    | 99.8%                                                                                                                      |
| Absorption correction             | Multi-scan                                                                                                                 |
| Refinement method                 | SHELXL-2018/3 (Sheldrick 2015)                                                                                             |
| Data/restraints/parameters        | 3638 / 0 / 201                                                                                                             |
| Goodness-of-fit on F <sup>2</sup> | 0.972                                                                                                                      |
| Final R indices [I > 2σ(I)]       | R1 = 0.0807, wR2 = 0.1832                                                                                                  |
| R indices (all data)              | R1 = 0.1652, wR2 = 0.2296                                                                                                  |
| Largest diff. peak and hole       | 0.26 and -0.29 e.Å <sup>-3</sup>                                                                                           |

(3) X-ray Structure and Data<sup>3</sup> of 8b (CCDC 2226646) .

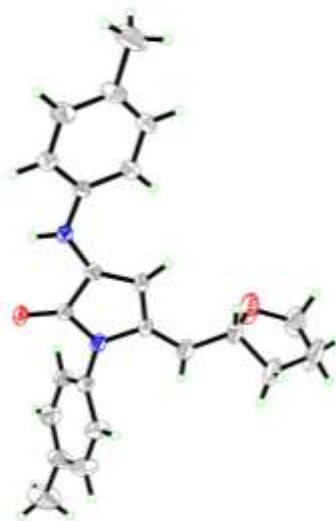

Figure S3 X-Ray crystal structure of 8b.

Table S6 Crystal data and structure refinement for 8b.

|                                   |                                                                                                                              |
|-----------------------------------|------------------------------------------------------------------------------------------------------------------------------|
| Empirical formula                 | C <sub>23</sub> H <sub>24</sub> N <sub>2</sub> O                                                                             |
| Formula weight                    | 360.44                                                                                                                       |
| Temperature                       | 296.15 K                                                                                                                     |
| Wavelength                        | 0.71073 Å                                                                                                                    |
| Crystal system, space group       | monoclinic, P2 <sub>1</sub> /c                                                                                               |
| Unit cell dimensions              | a = 32.9740(7) Å      alpha = 90 deg.<br>b = 9.2490(18) Å      beta = 91.554(4) deg.<br>c = 15.640(3) Å      gamma = 90 deg. |
| Volume                            | 4768.0(16) Å <sup>3</sup>                                                                                                    |
| Z, Calculated density             | 8, 1.004 Mg/m <sup>3</sup>                                                                                                   |
| Absorption coefficient            | 0.064 mm <sup>-1</sup>                                                                                                       |
| F(000)                            | 1536.0                                                                                                                       |
| Theta range for data collection   | 5.282 to 55.134 deg.                                                                                                         |
| Limiting indices                  | -38<=h<=40, -11<=k<=11, -12<=l<=20                                                                                           |
| Completeness to theta = 25.242    | 99.8%                                                                                                                        |
| Absorption correction             | Multi-scan                                                                                                                   |
| Refinement method                 | SHELXL-2018/3 (Sheldrick 2015)                                                                                               |
| Data/restraints/parameters        | 5358 / 0 / 246                                                                                                               |
| Goodness-of-fit on F <sup>2</sup> | 1.030                                                                                                                        |
| Final R indices [I>2sigma(I)]     | R1 = 0.0876, wR2 = 0.2455                                                                                                    |
| R indices (all data)              | R1 = 0.1619, wR2 = 0.2864                                                                                                    |
| Largest diff. peak and hole       | 0.27 and -0.21 e.Å <sup>-3</sup>                                                                                             |

**6.  $^1\text{H}$  NMR,  $^{13}\text{C}$  NMR and HRMS spectra for spectroscopic data.**

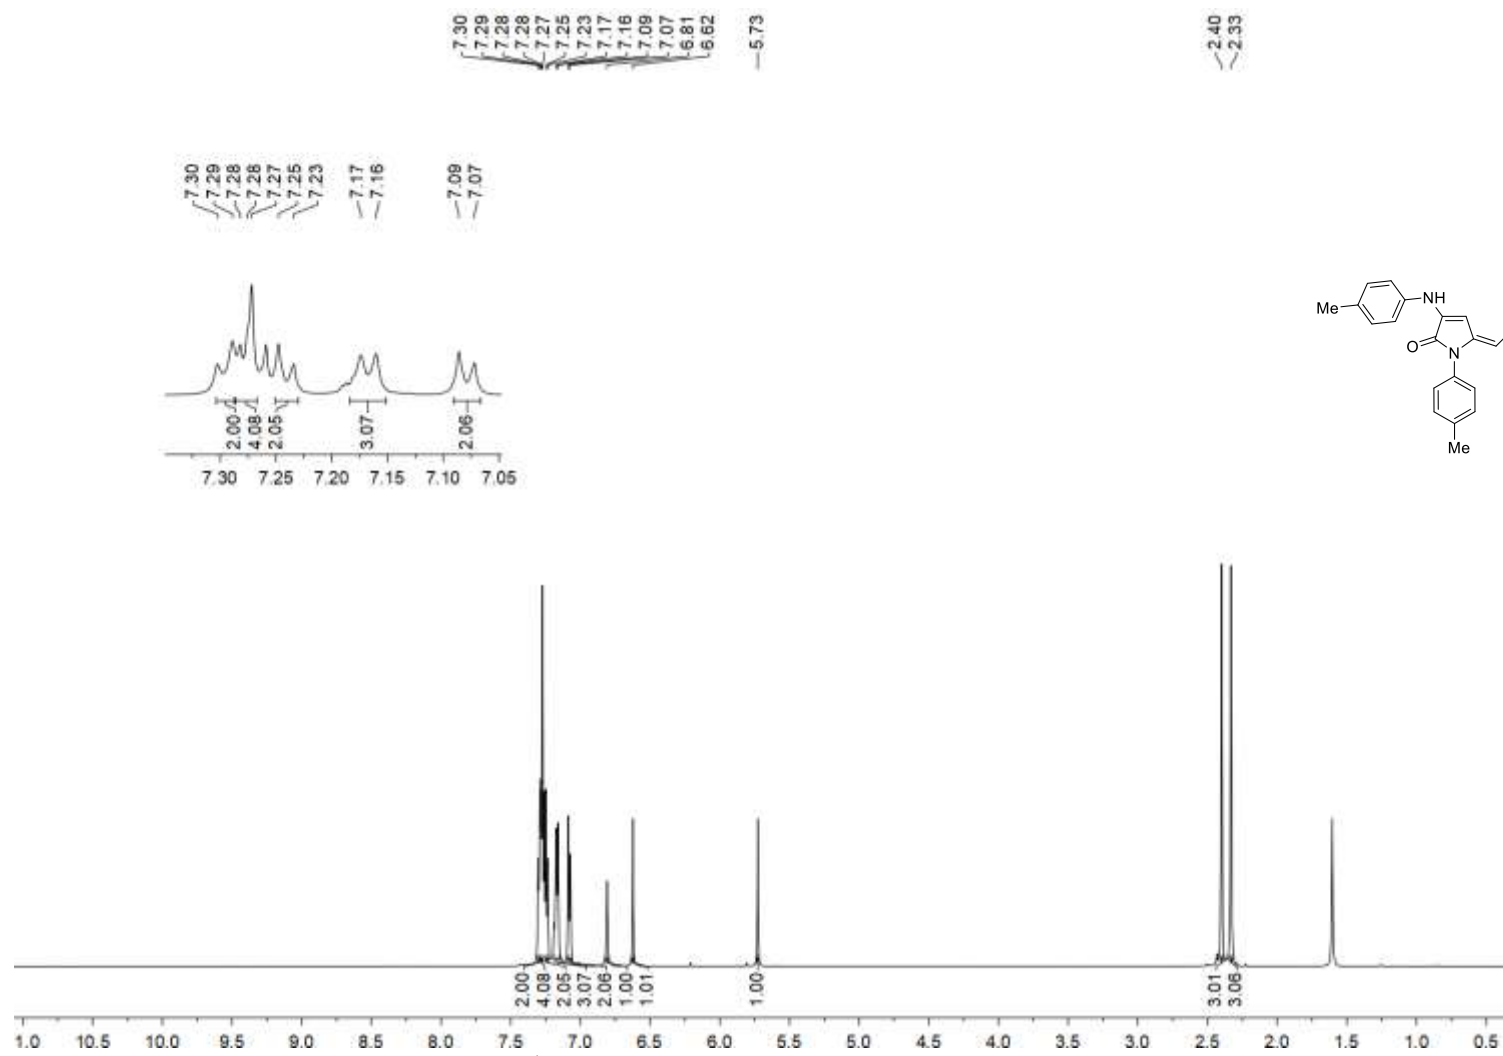

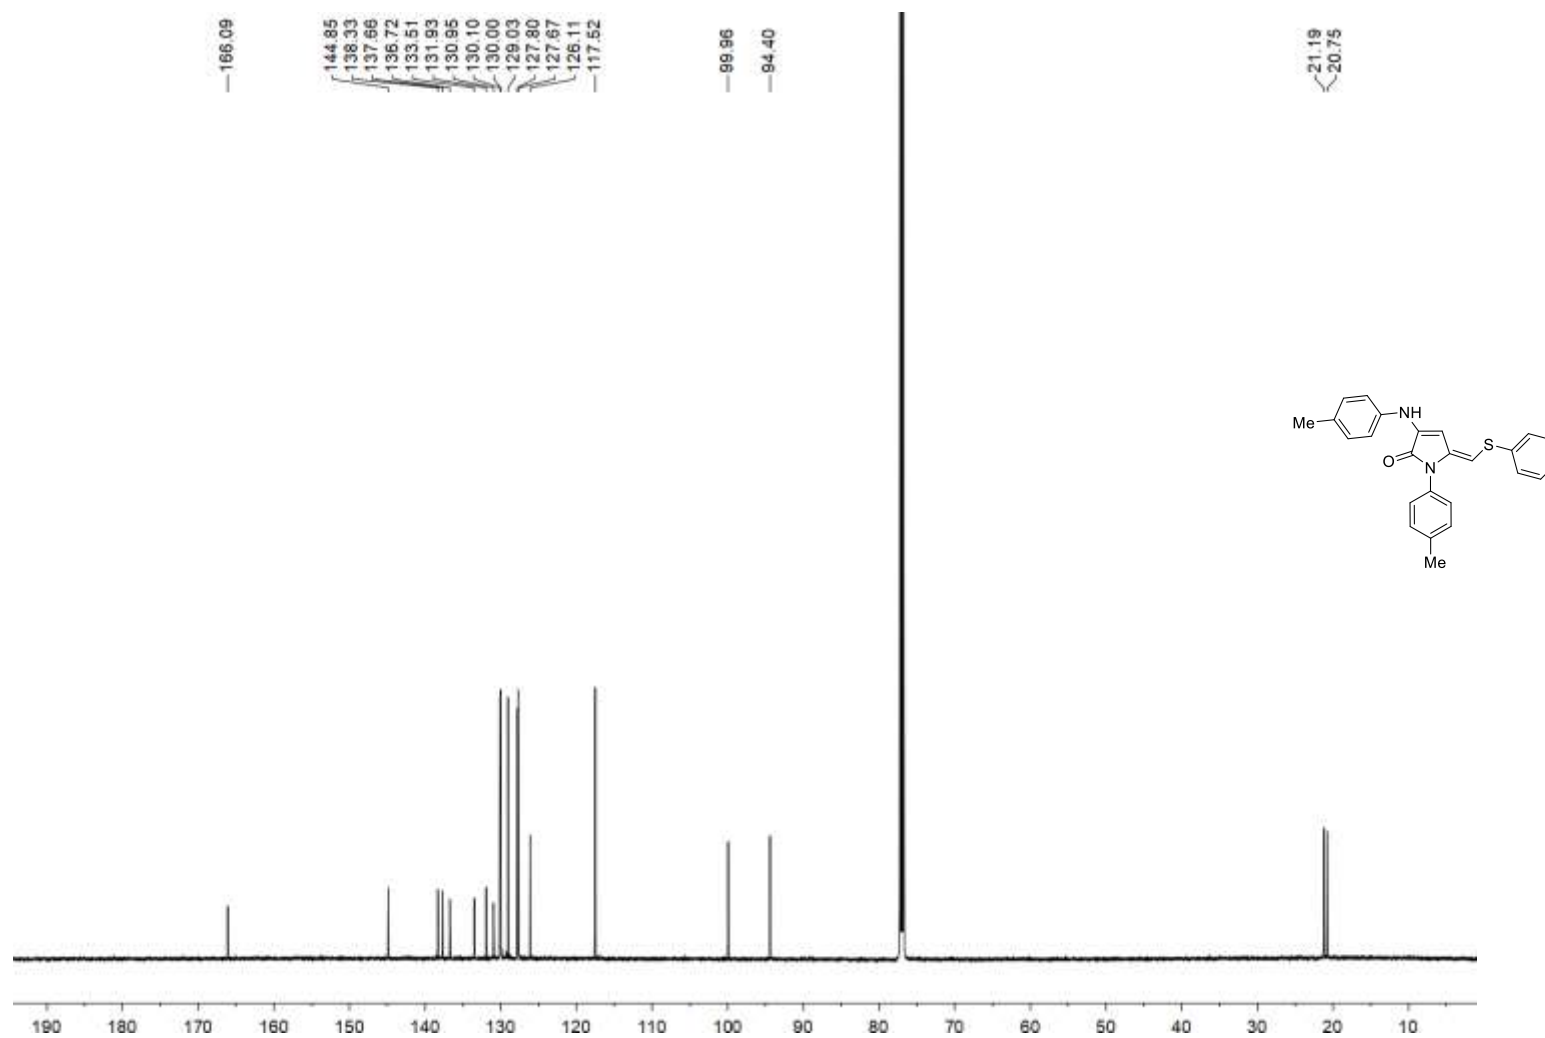

Figure S5.  $^{13}\text{C}$  NMR (150 MHz,  $\text{CDCl}_3$ ) spectra of compound **4a**

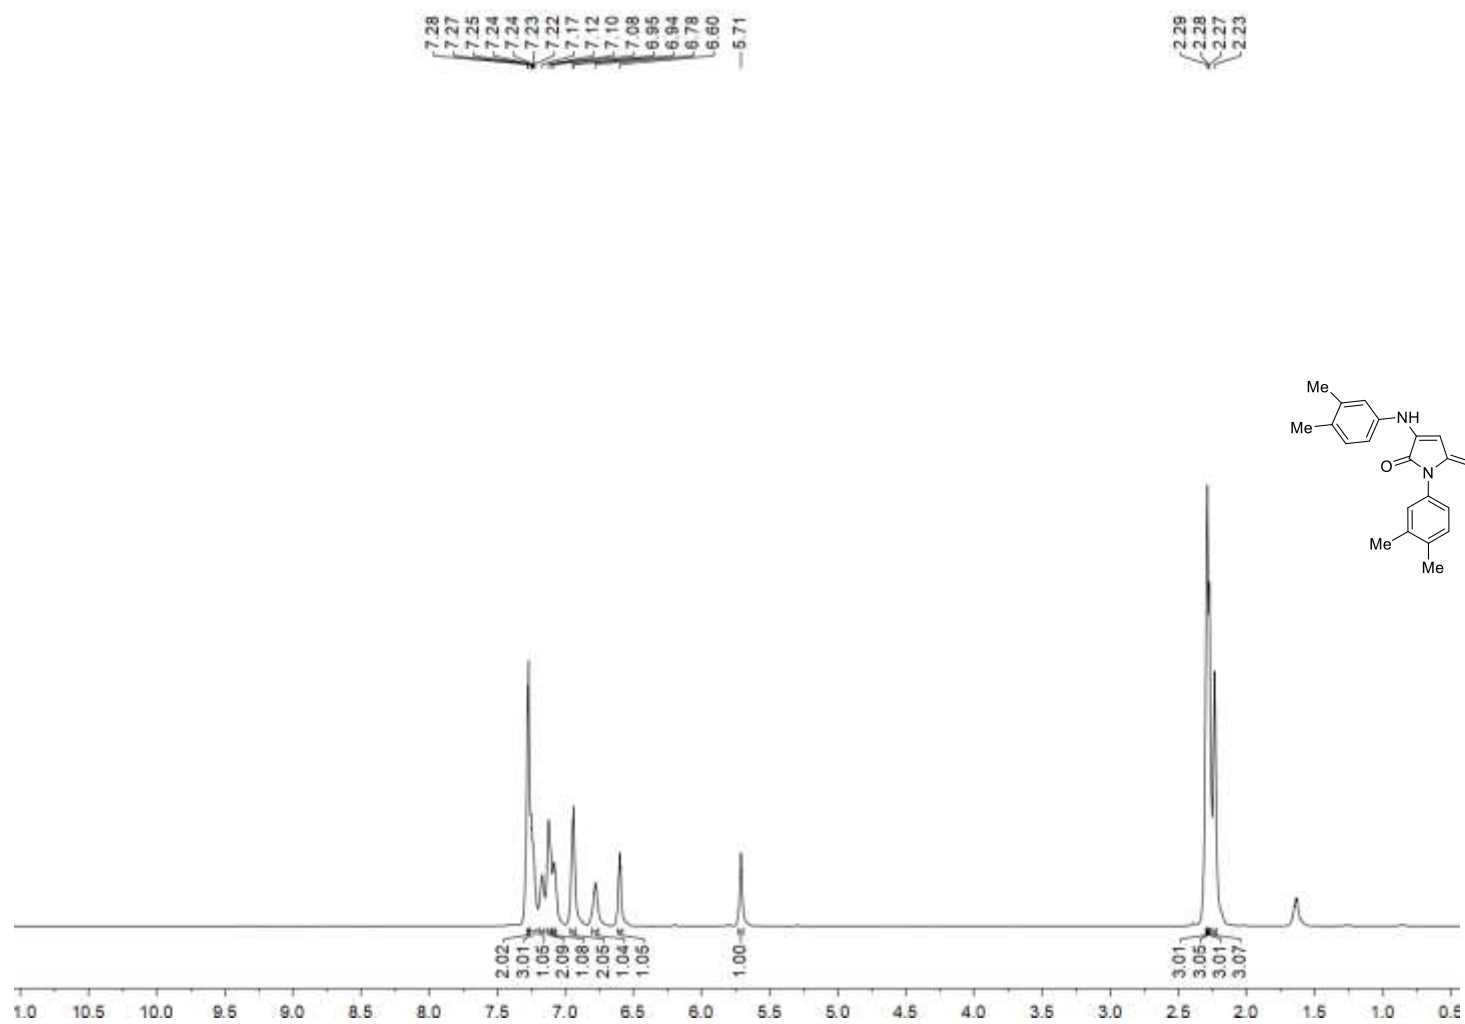

Figure S6.  $^1\text{H}$  NMR (600 MHz,  $\text{CDCl}_3$ ) spectra of compound **4b**

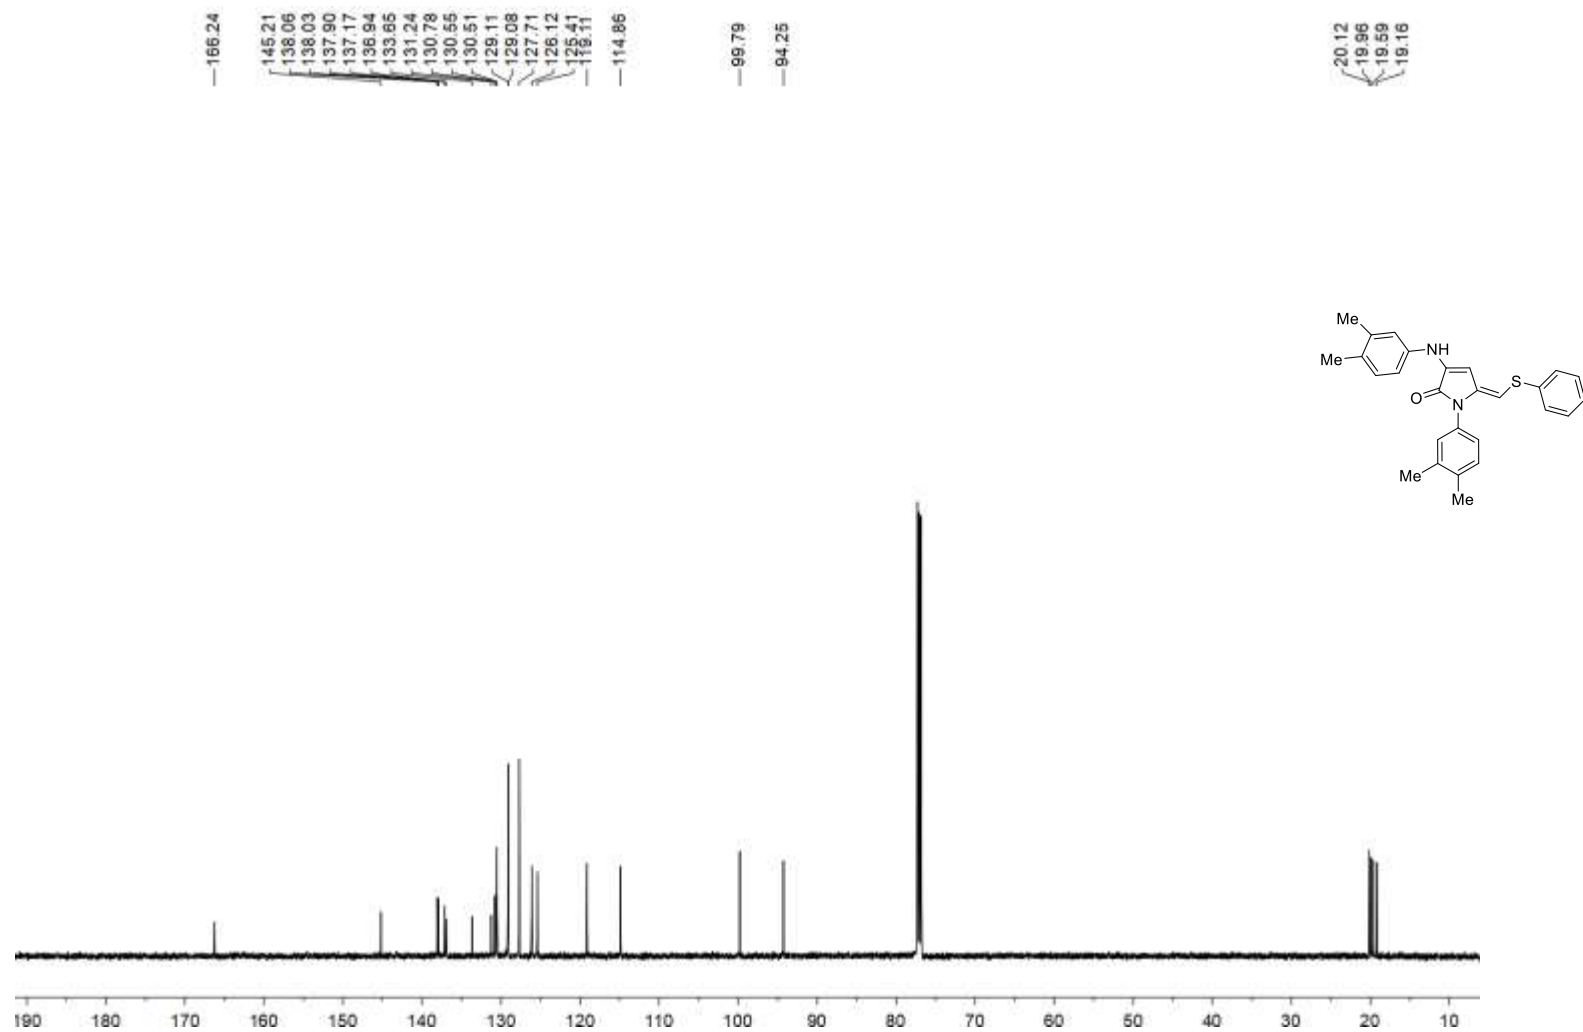

Figure S7. <sup>13</sup>C NMR (150 MHz, CDCl<sub>3</sub>) spectra of compound **4b**

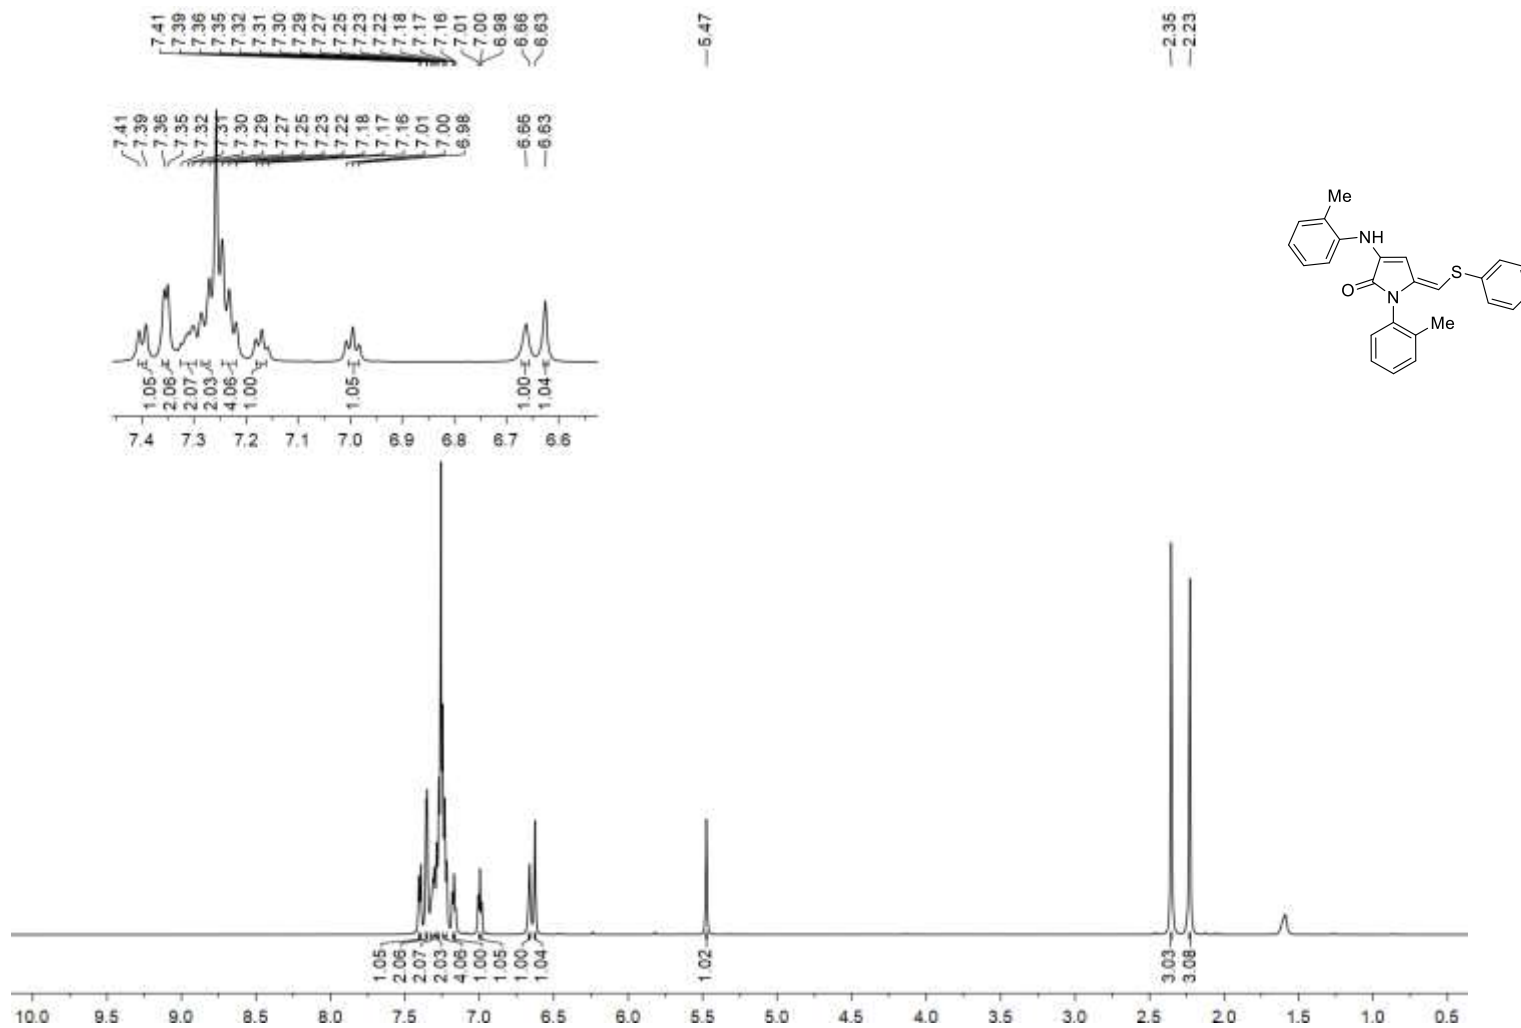



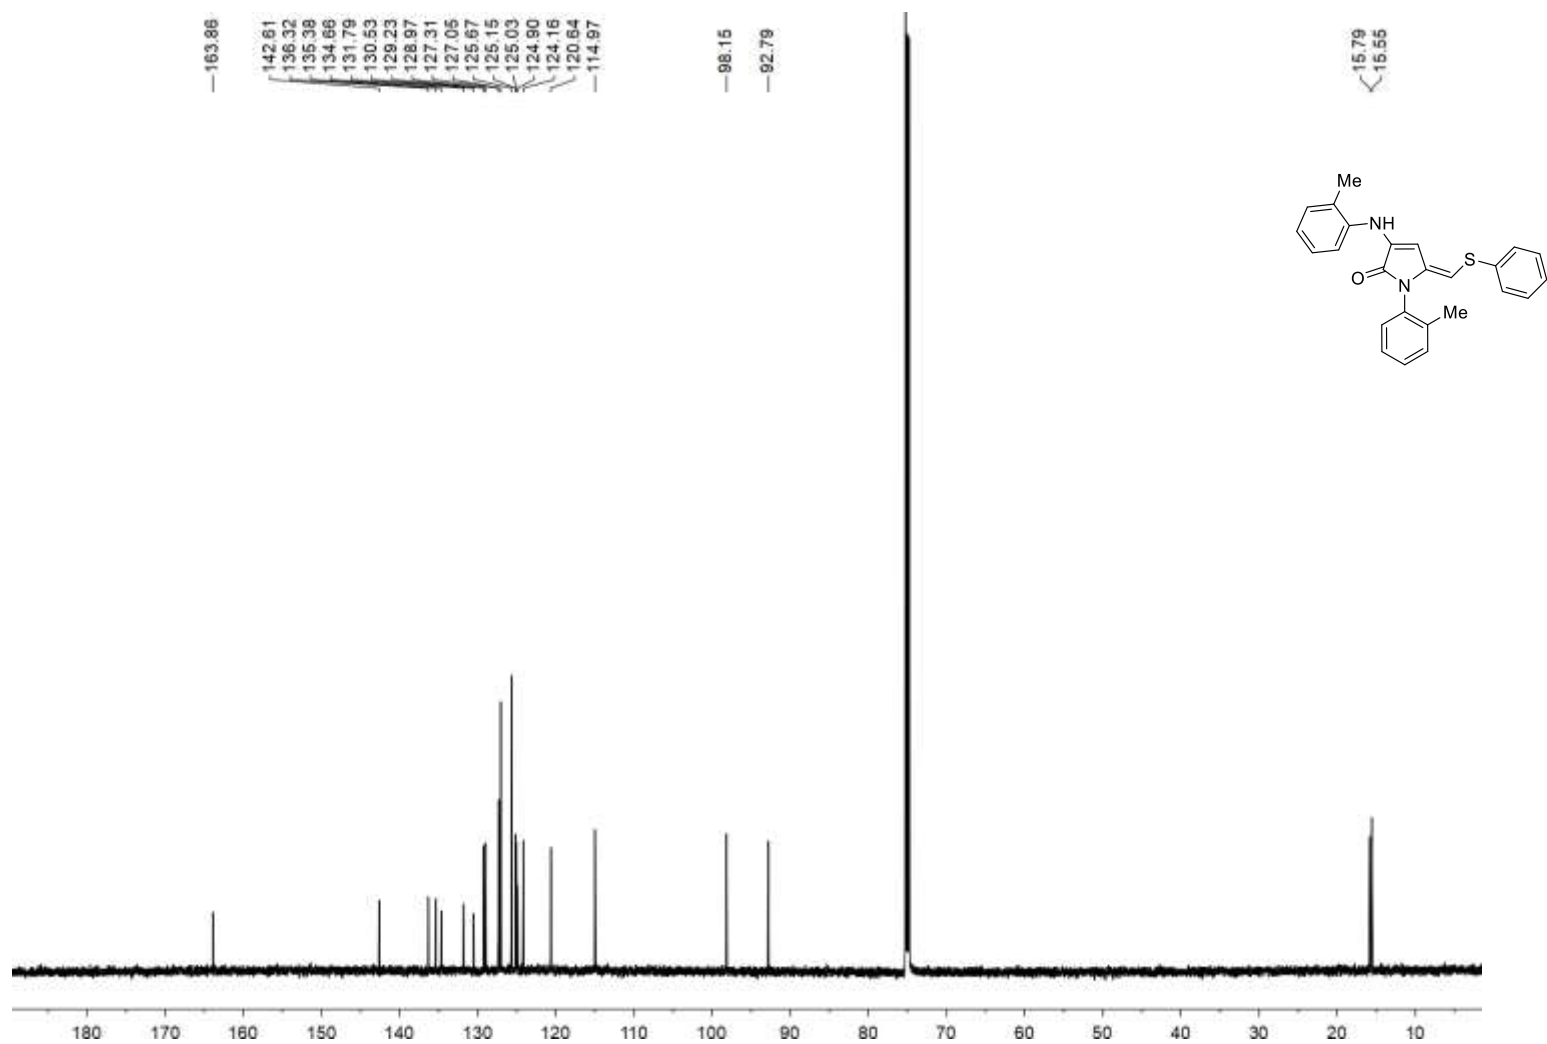

Figure S9.  $^{13}\text{C}$  NMR (150 MHz,  $\text{CDCl}_3$ ) spectra of compound **4c**

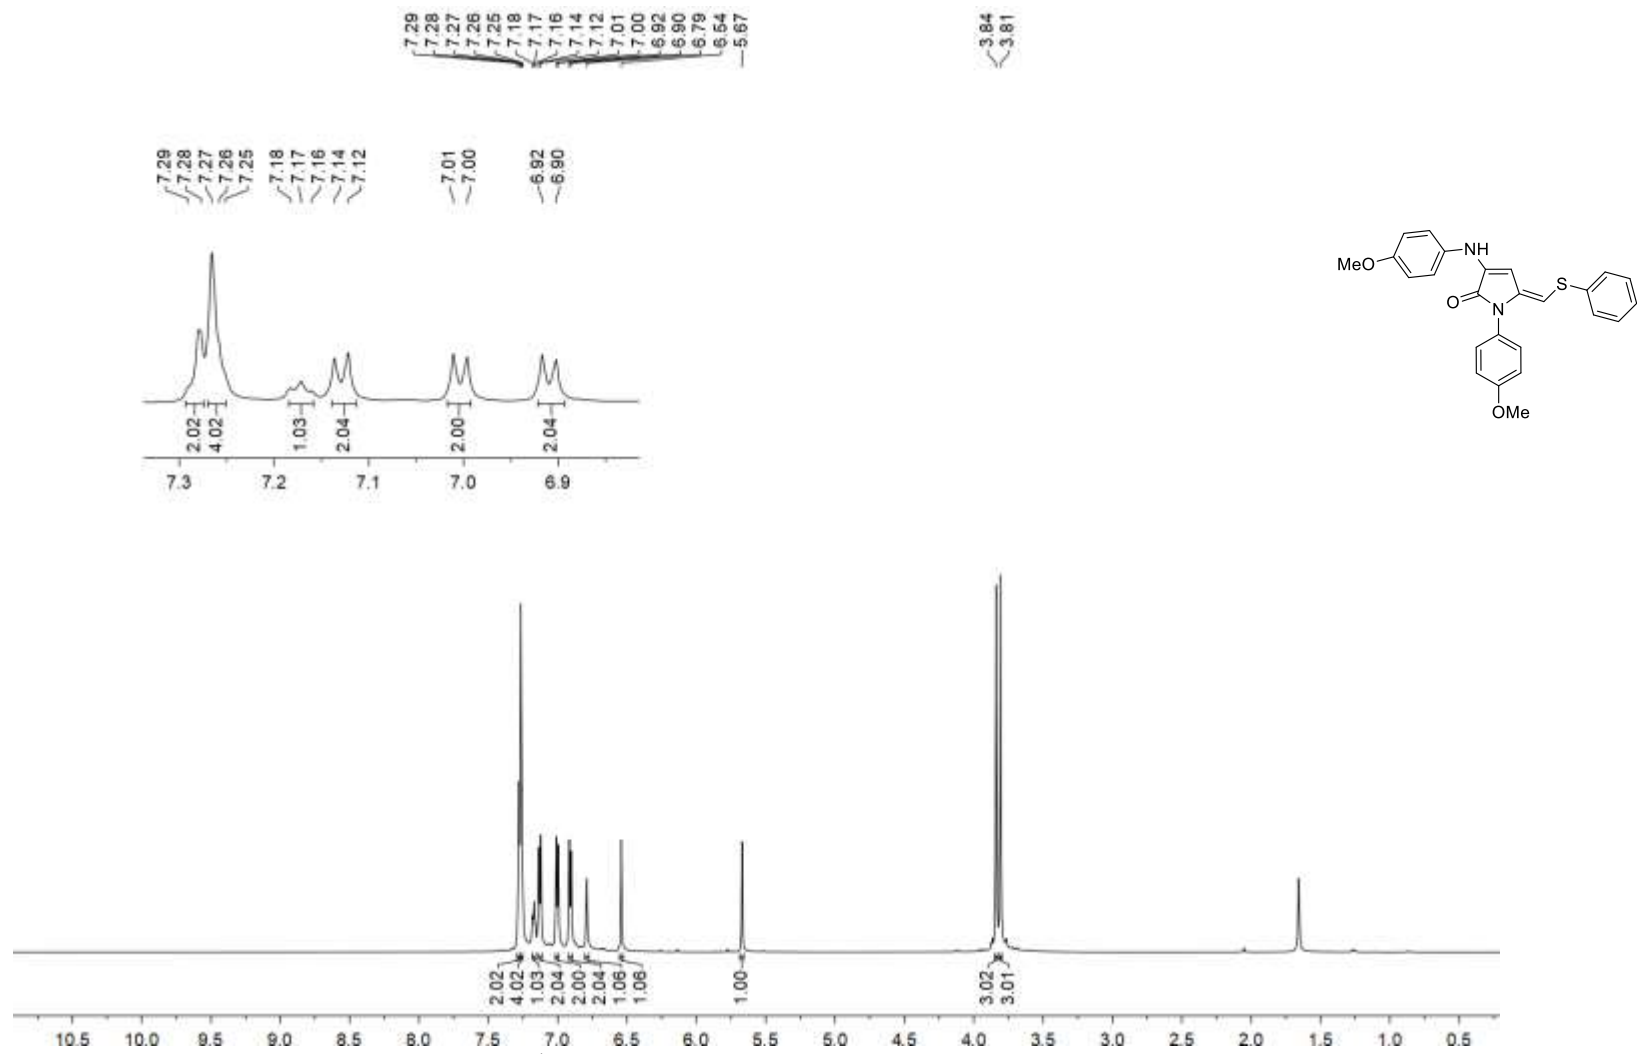

Figure S10.  $^1\text{H}$  NMR (600 MHz,  $\text{CDCl}_3$ ) spectra of compound **4d**

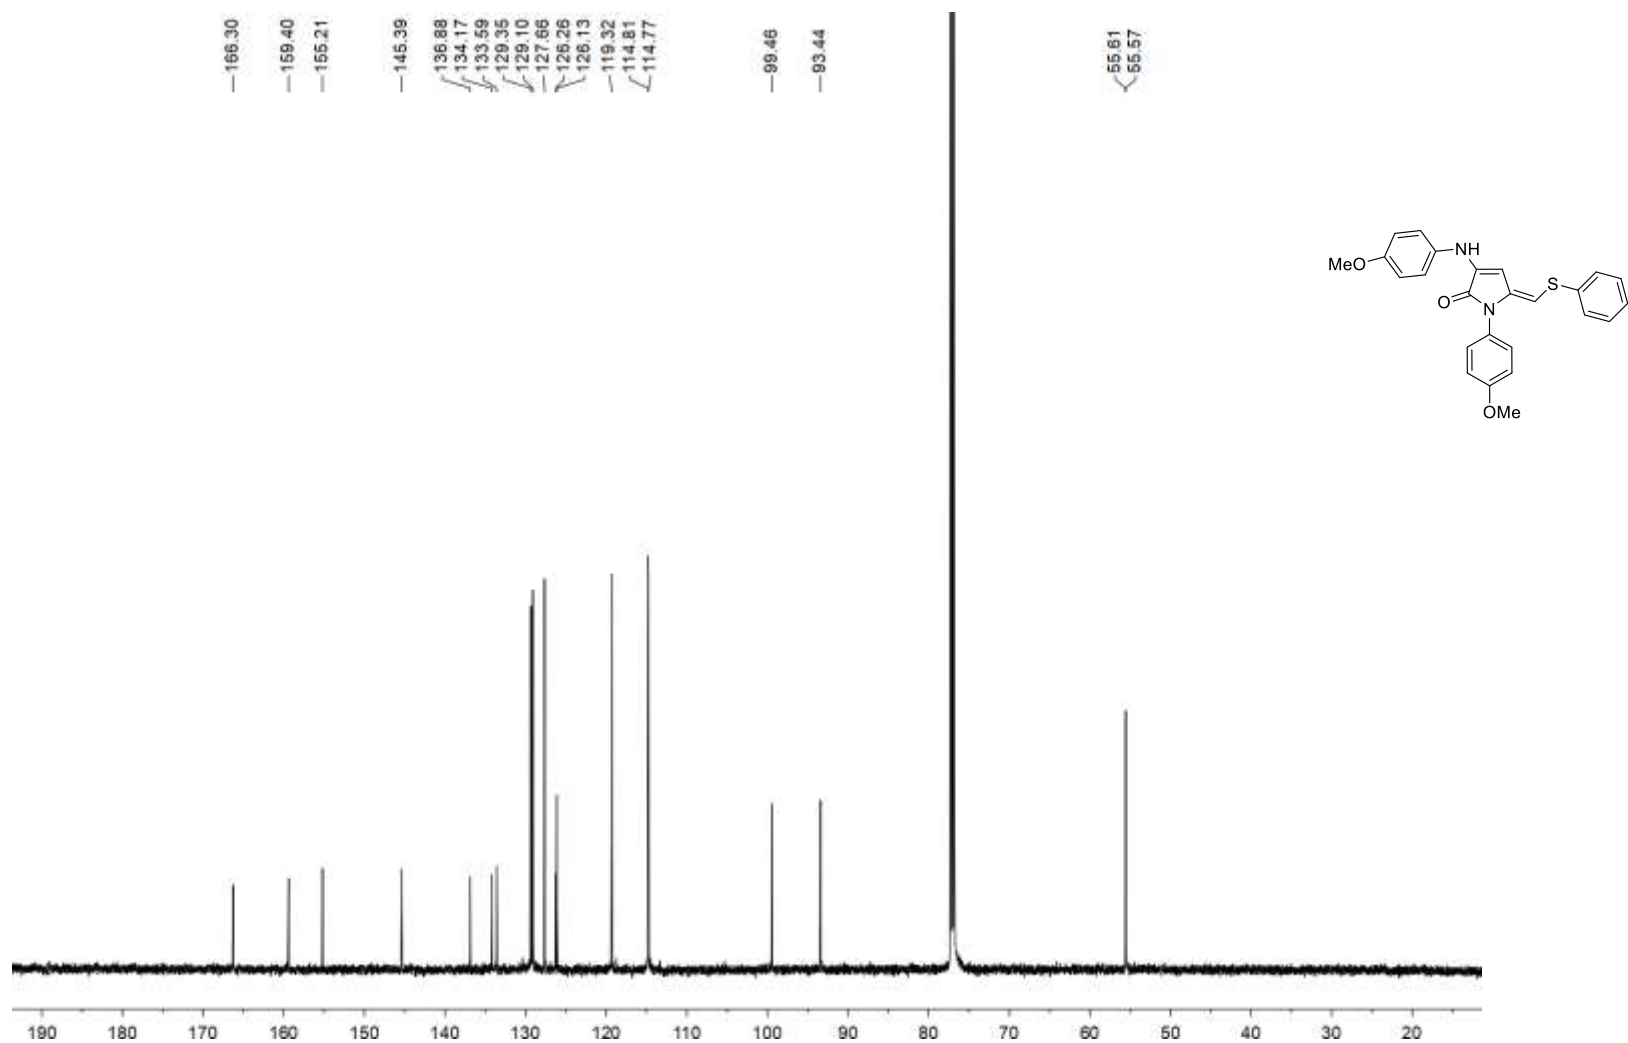

Figure S11. <sup>13</sup>C NMR (150 MHz, CDCl<sub>3</sub>) spectra of compound 4d

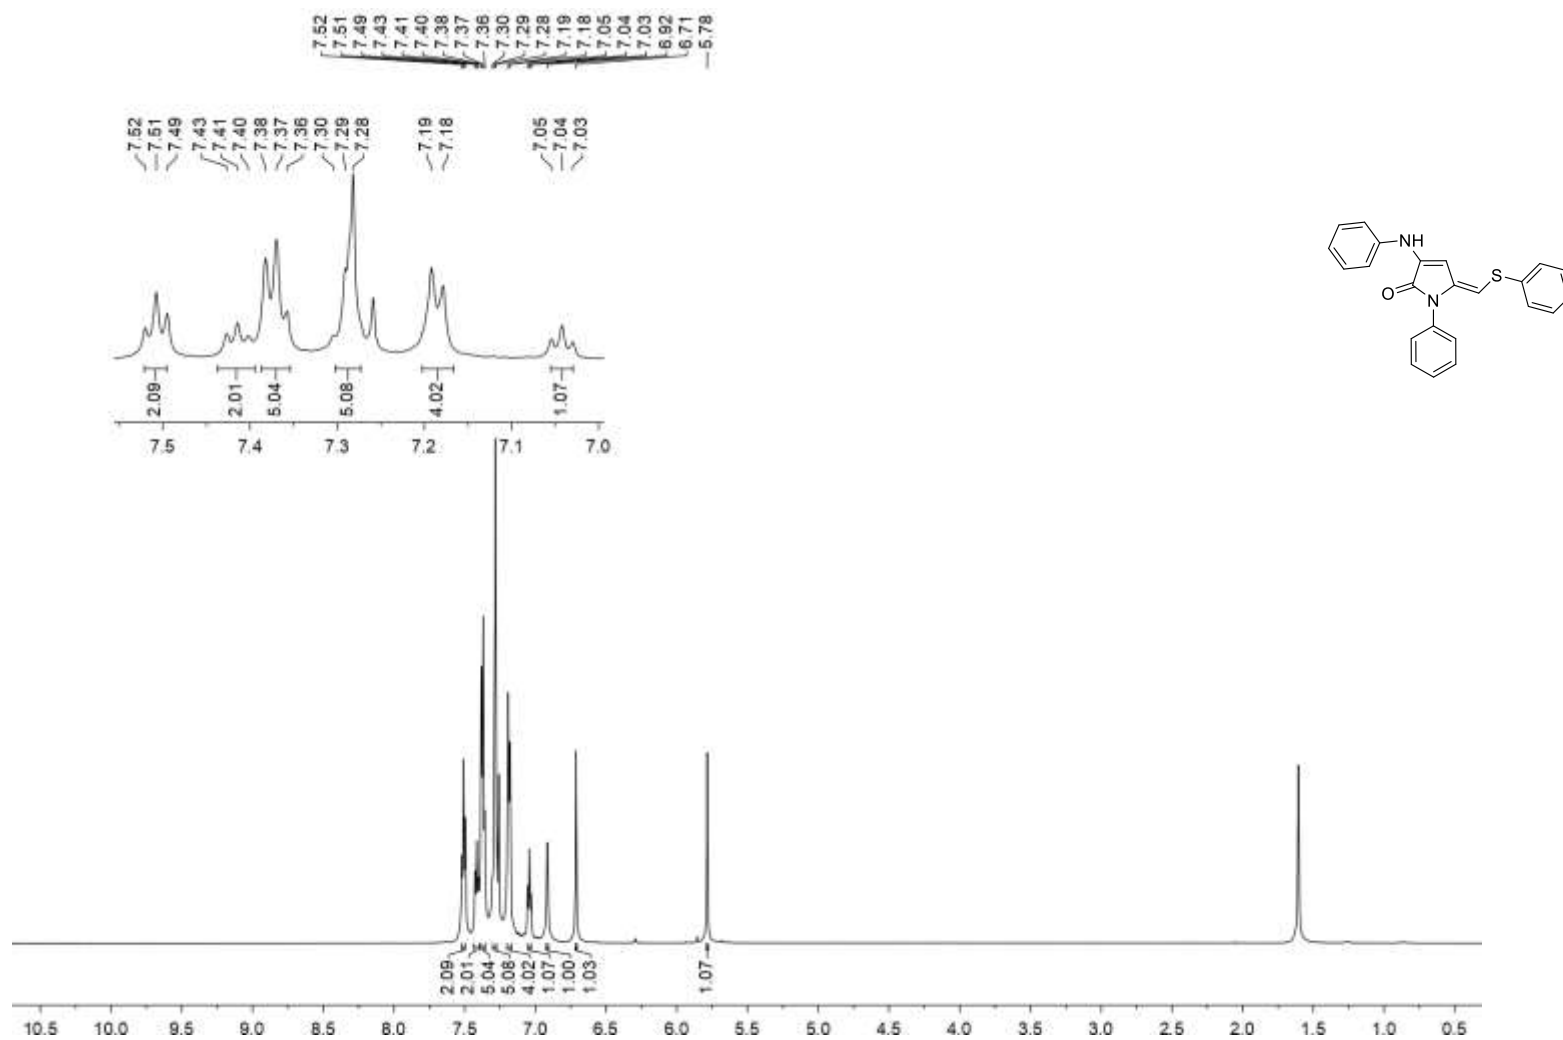

Figure S12. <sup>1</sup>H NMR (600 MHz, CDCl<sub>3</sub>) spectra of compound 4e

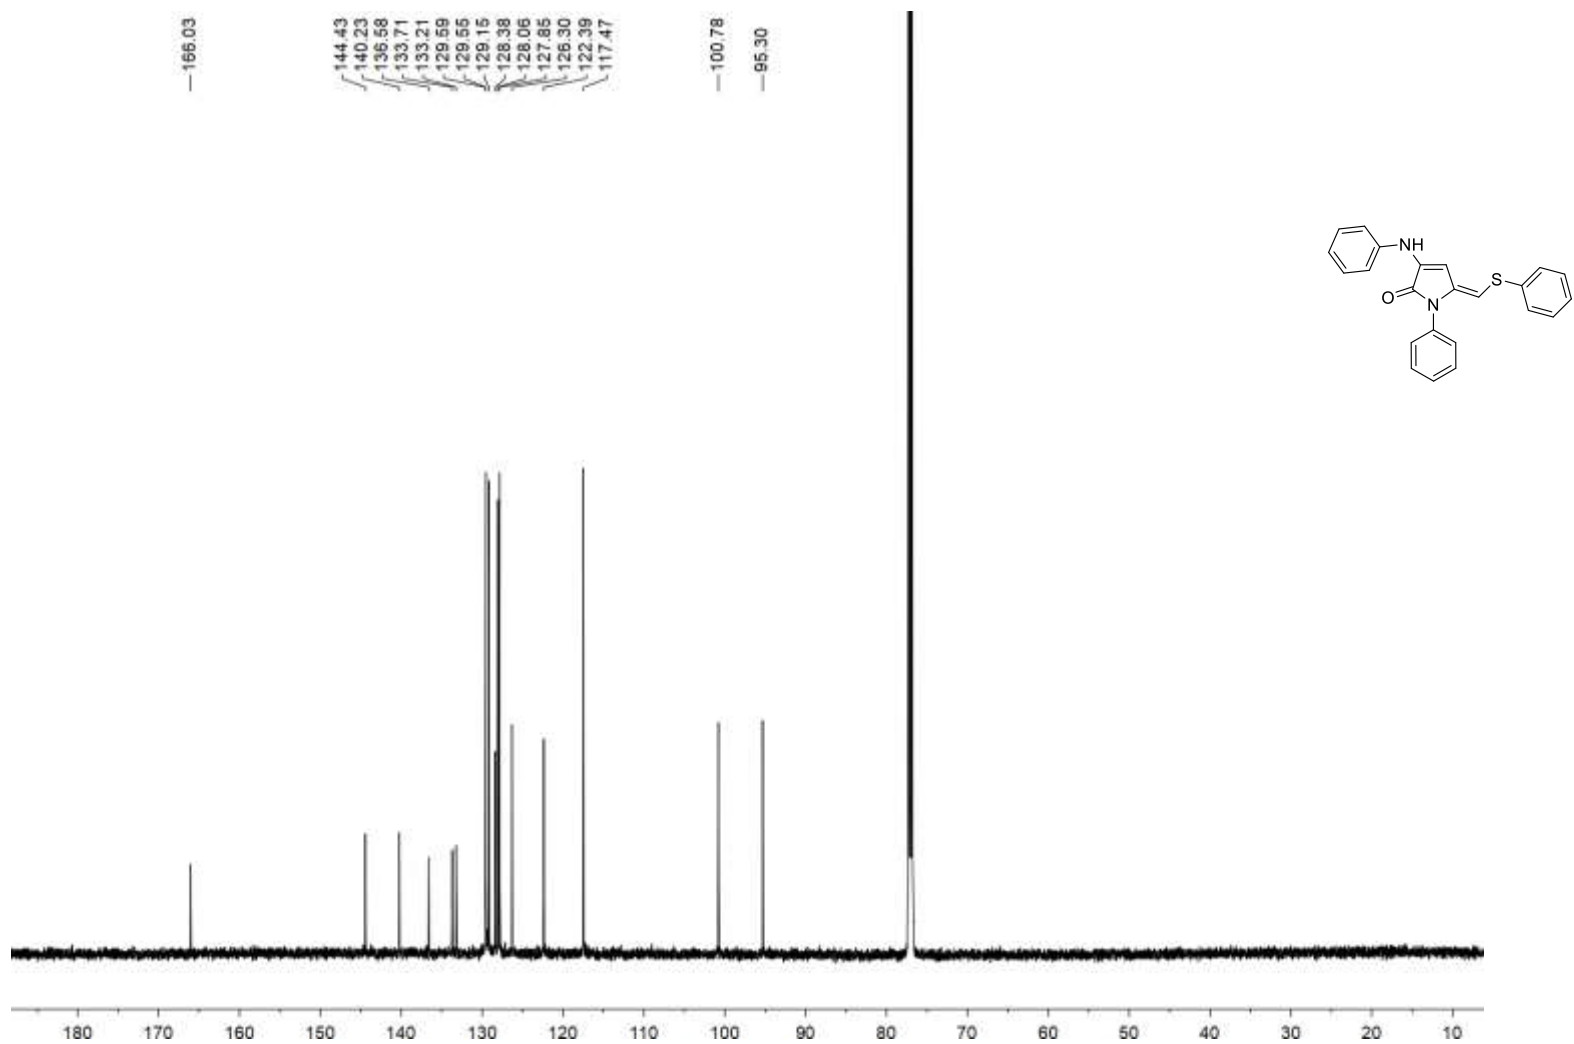

Figure S13.  $^{13}\text{C}$  NMR (150 MHz,  $\text{CDCl}_3$ ) spectra of compound 4e

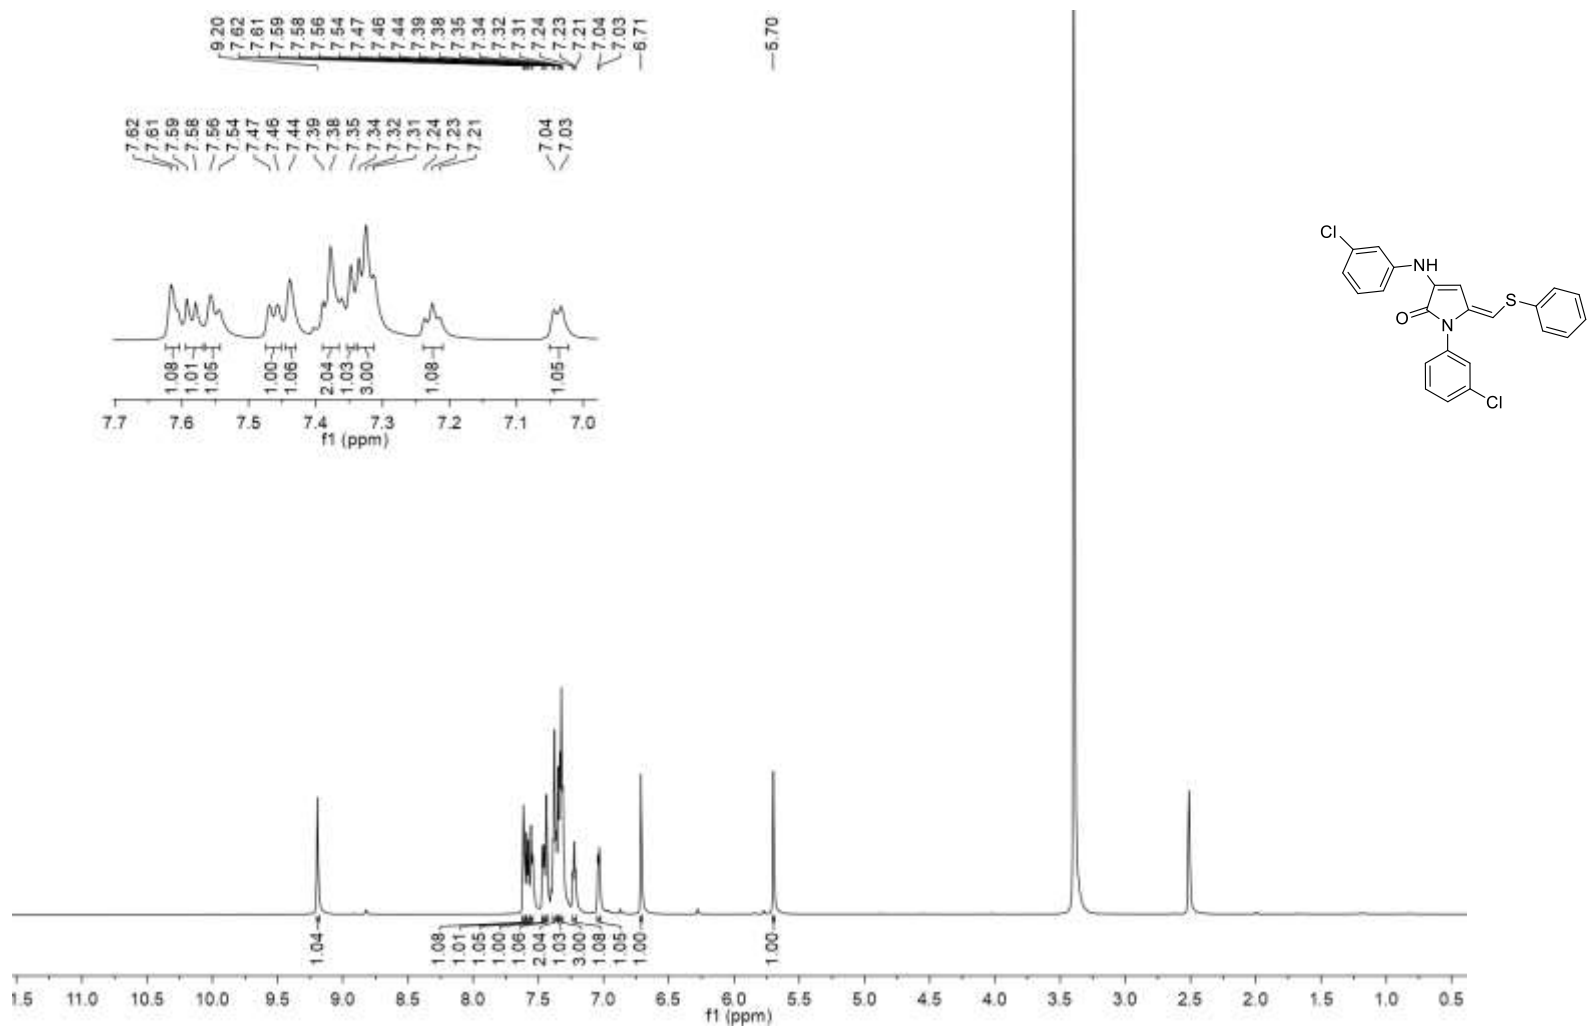

**Figure S14.** <sup>1</sup>H NMR (600 MHz, DMSO-*d*<sub>6</sub>) spectra of compound **4f**

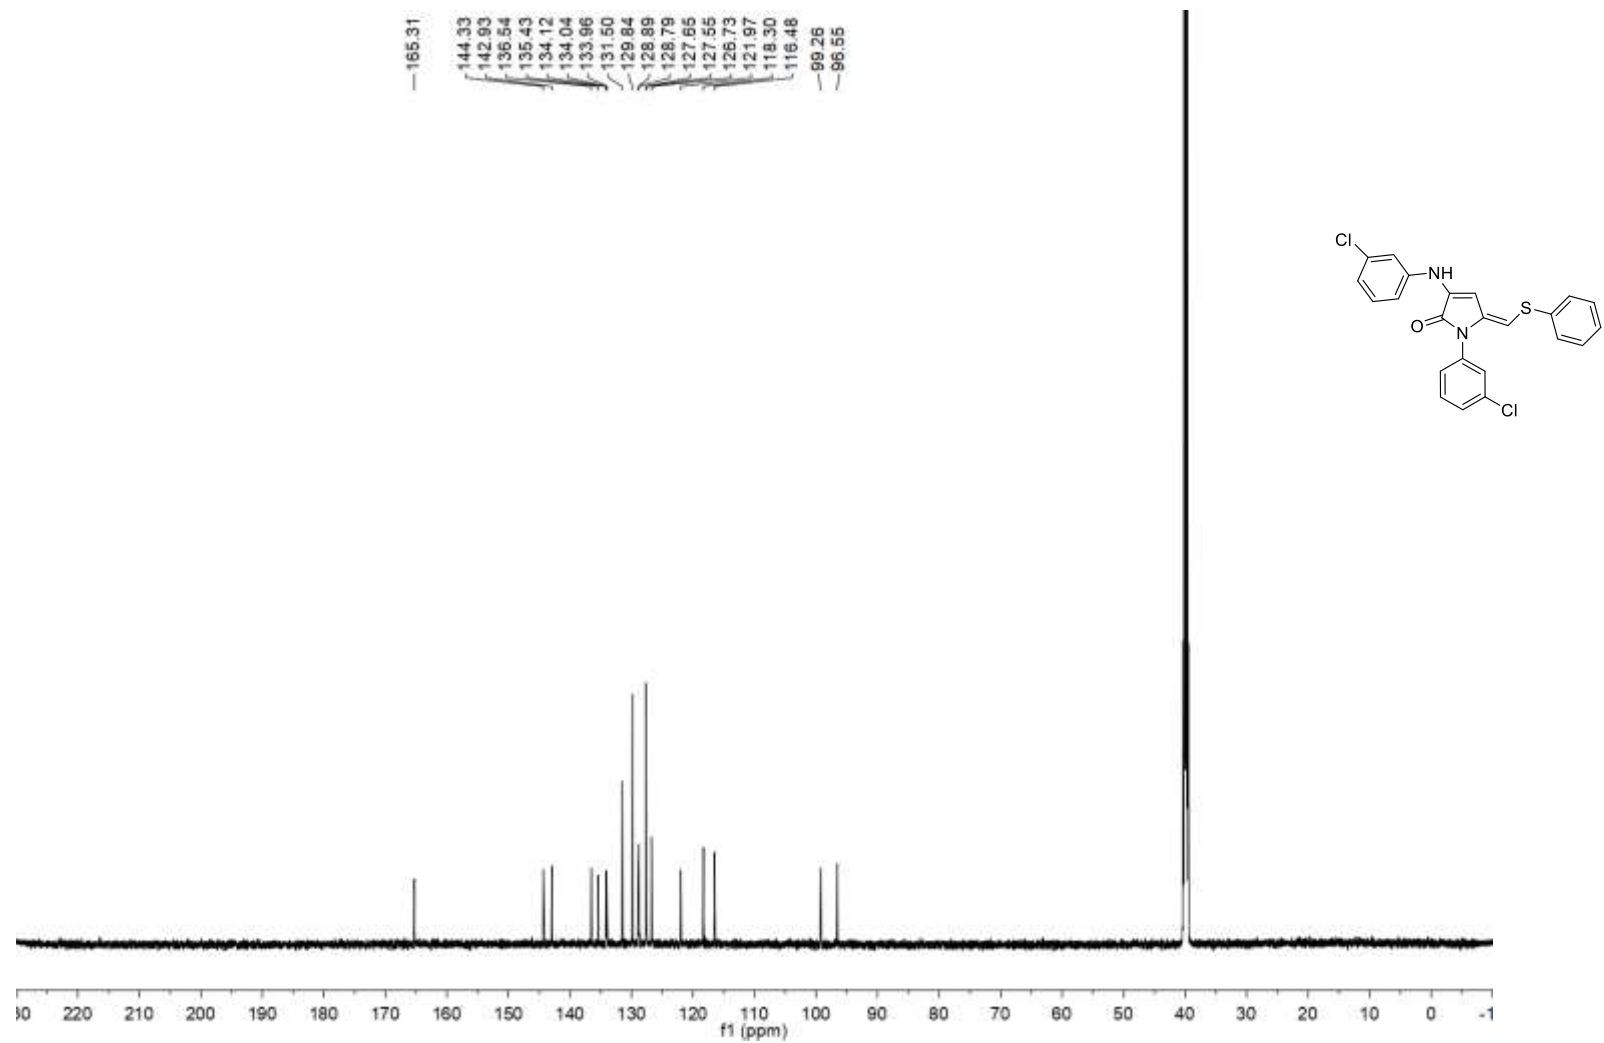

Figure S15.  $^{13}\text{C}$  NMR (150 MHz,  $\text{DMSO-}d_6$ ) spectra of compound **4f**

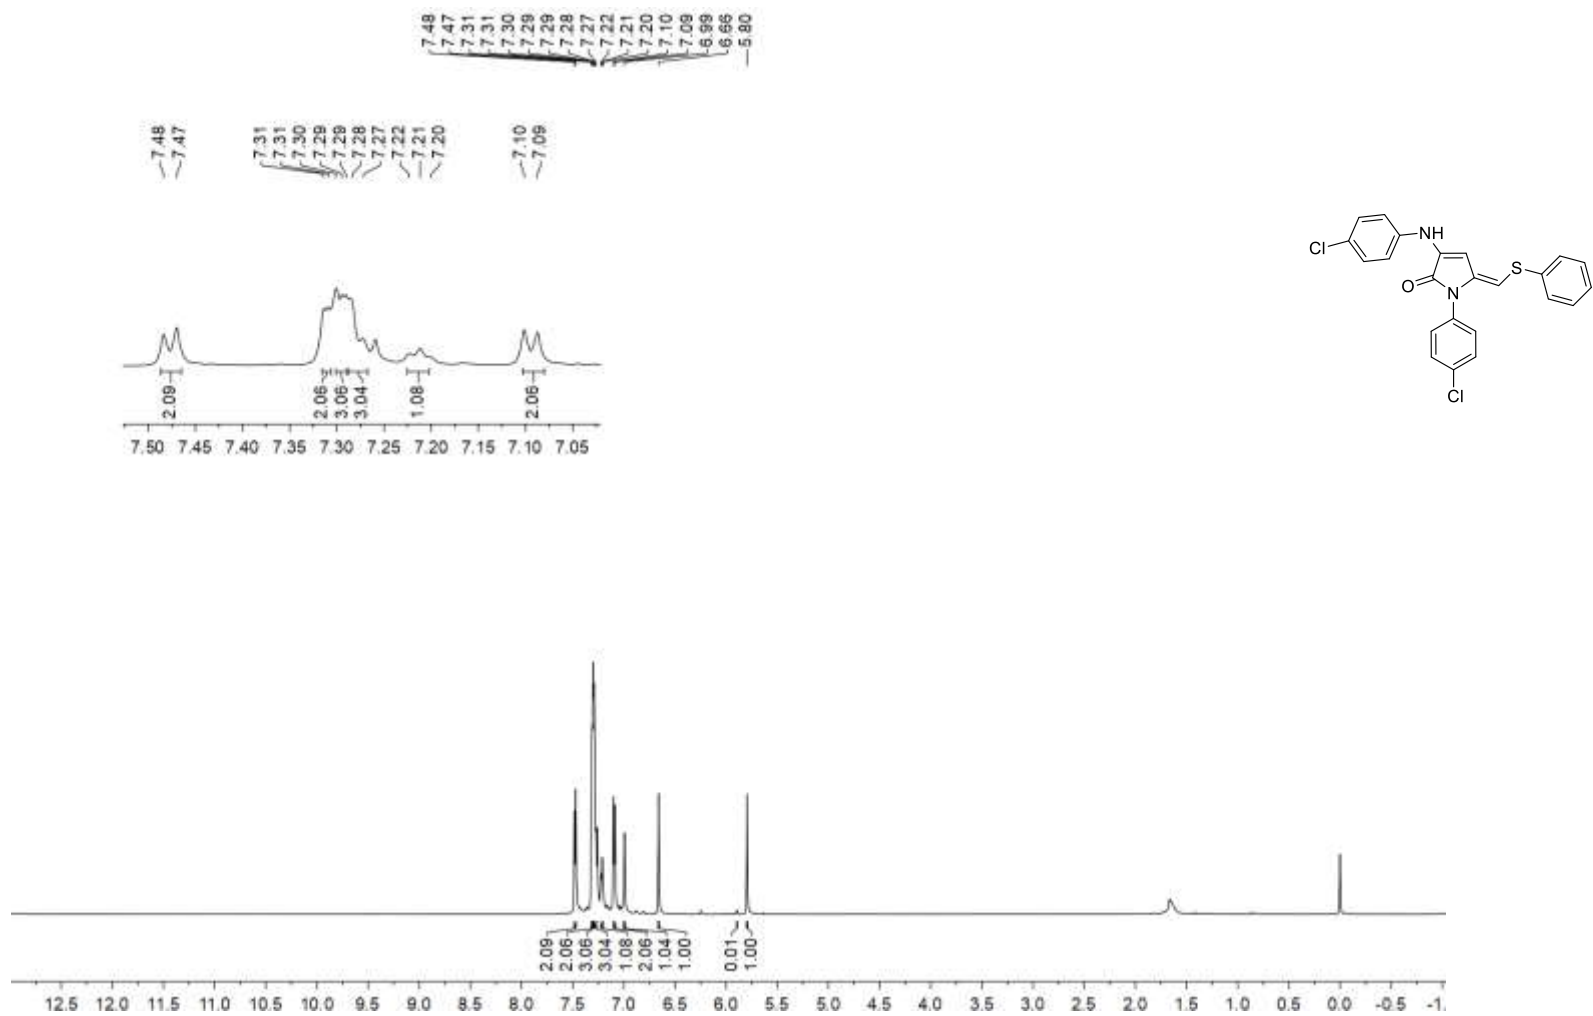



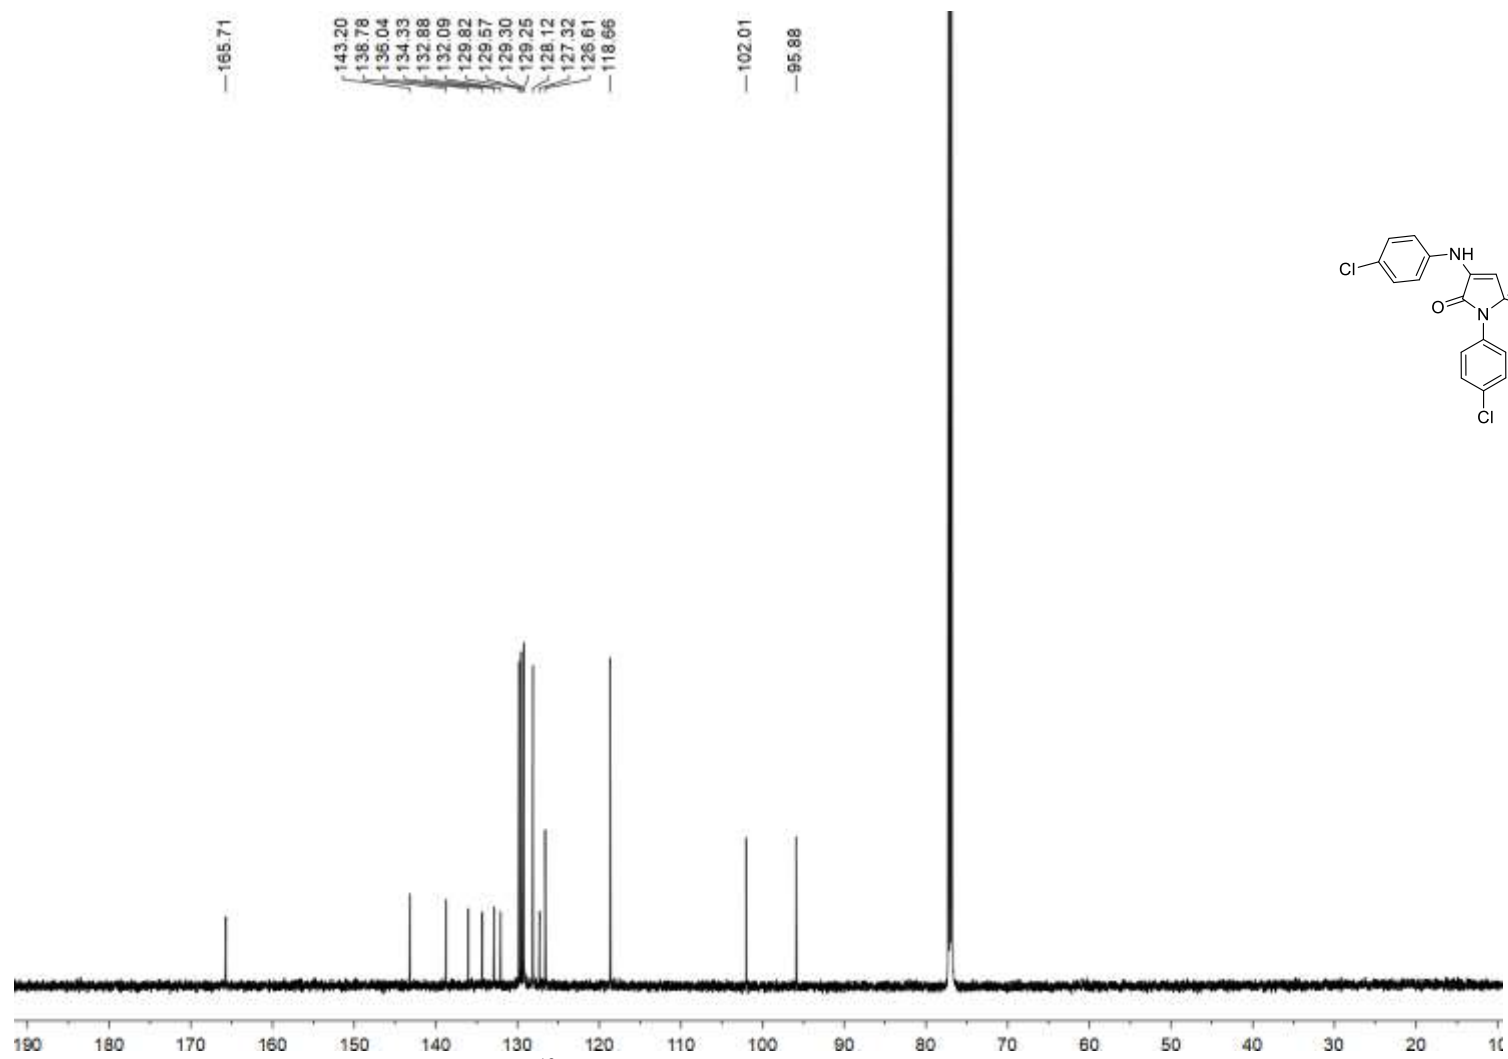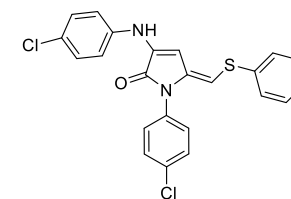

Figure S17.  $^{13}\text{C}$  NMR (150 MHz,  $\text{CDCl}_3$ ) spectra of compound **4g**

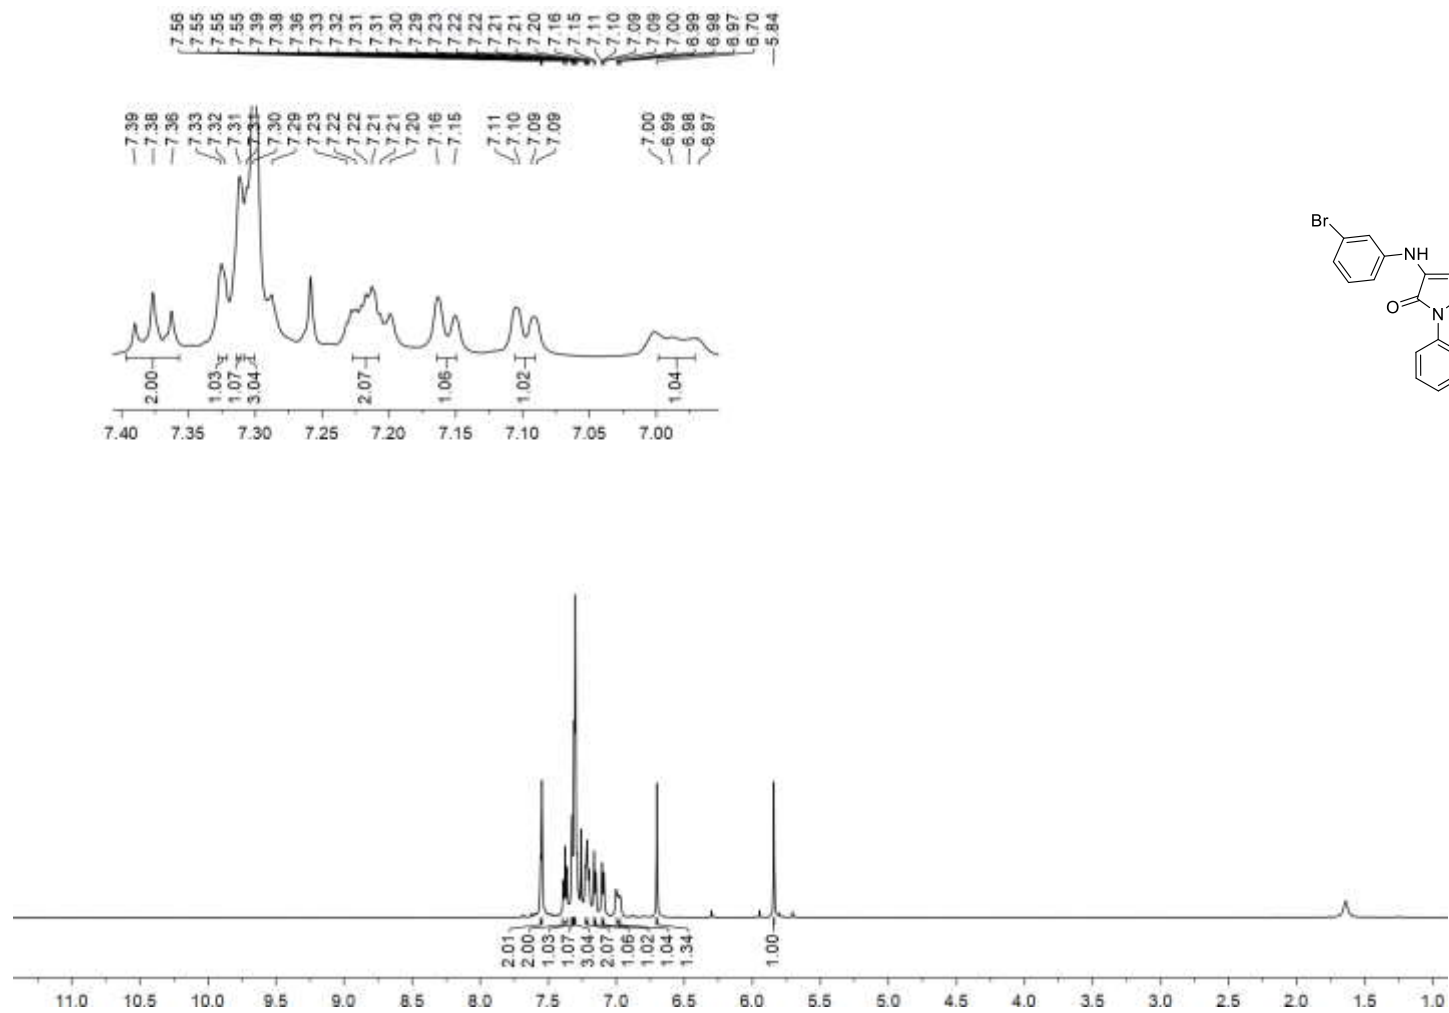

**Figure S18. <sup>1</sup>H NMR (600 MHz, CDCl<sub>3</sub>) spectra of compound **4h****

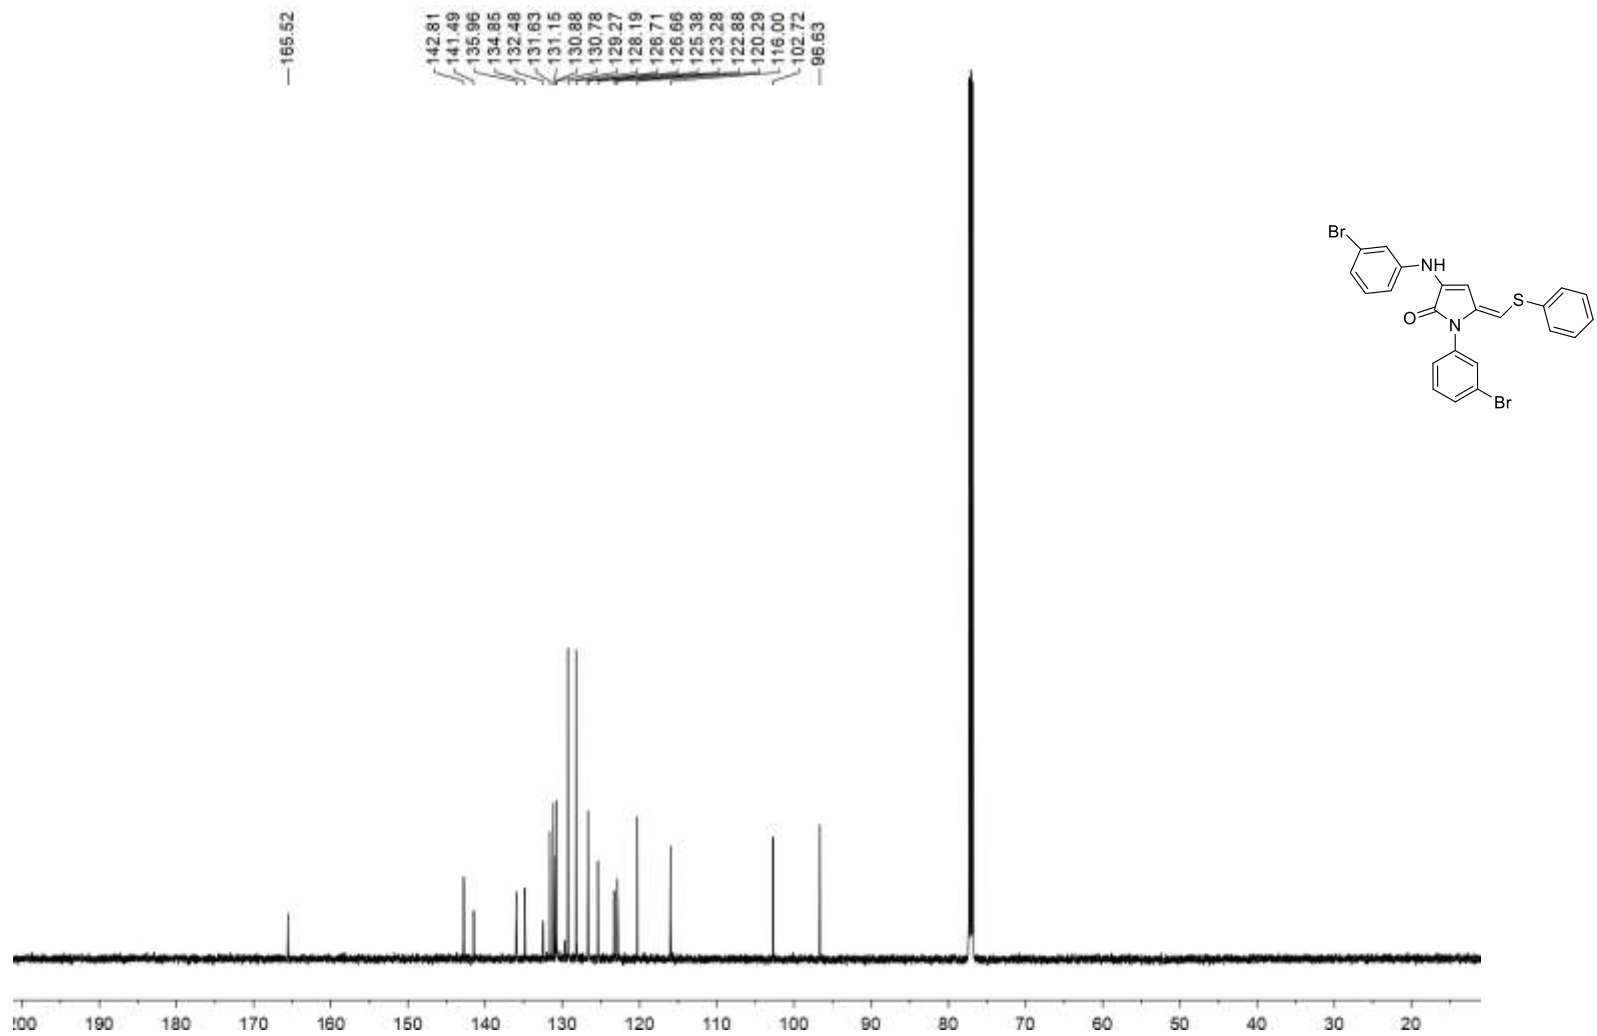

Figure S19. <sup>13</sup>C NMR (150 MHz, CDCl<sub>3</sub>) spectra of compound 4h

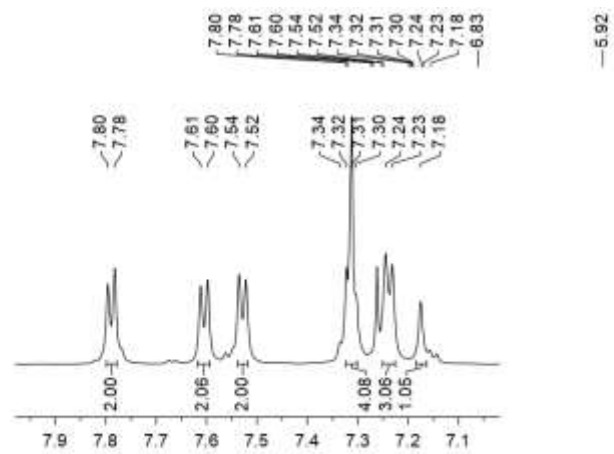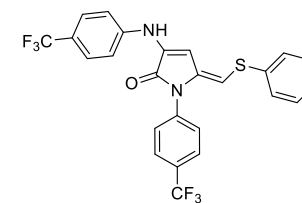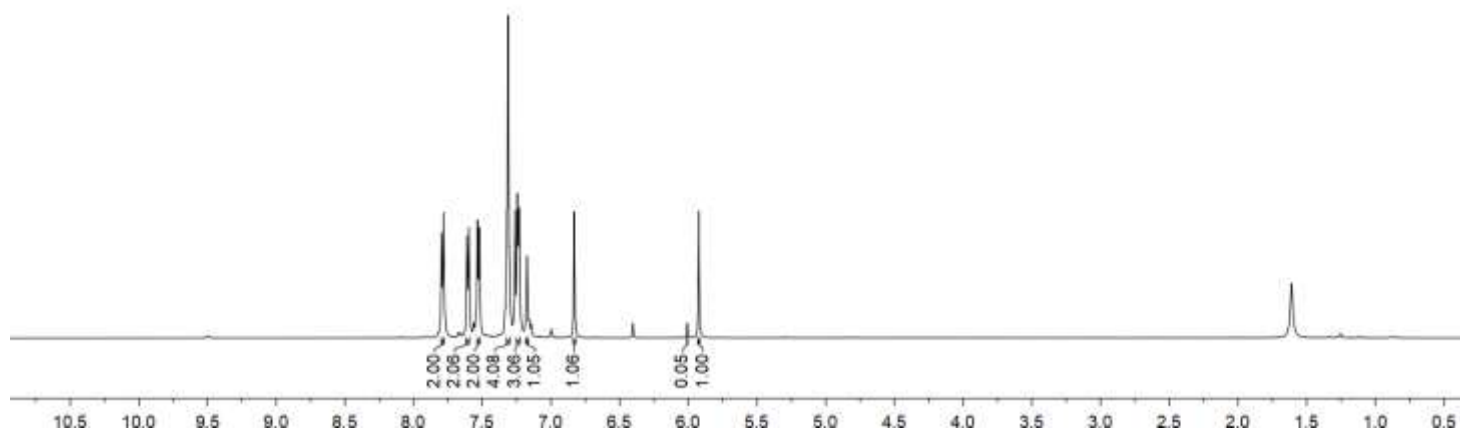

Figure S20.  $^1\text{H}$  NMR (600 MHz,  $\text{CDCl}_3$ ) spectra of compound **4i**

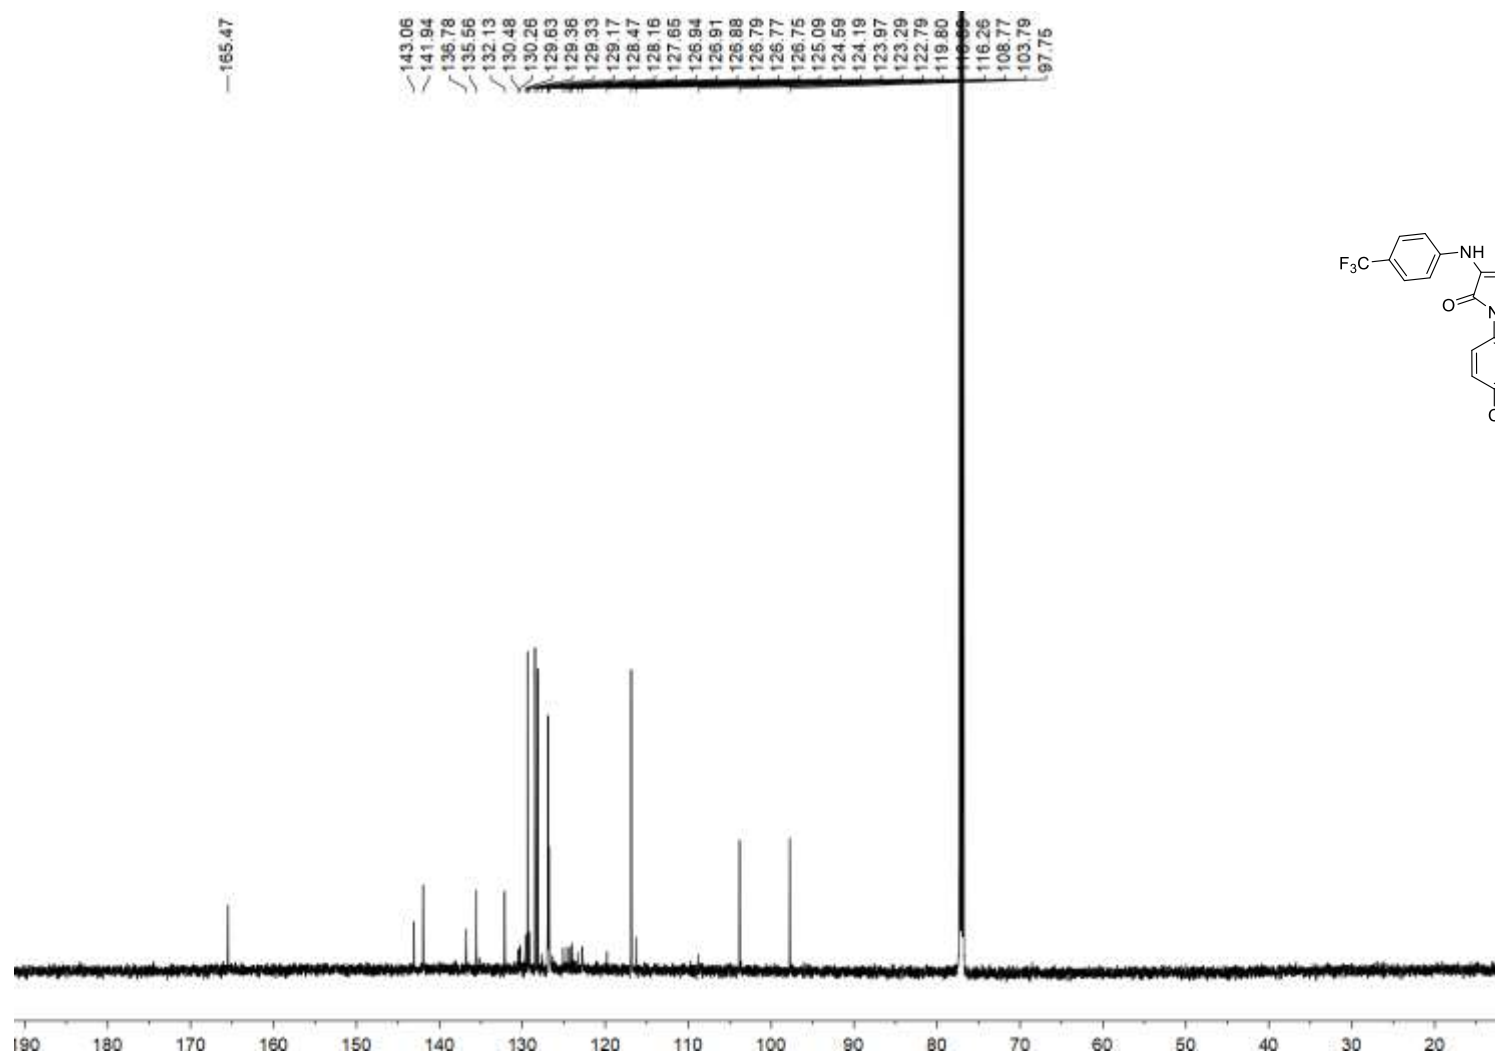

Figure S21.  $^{13}\text{C}$  NMR (150 MHz,  $\text{CDCl}_3$ ) spectra of compound **4i**

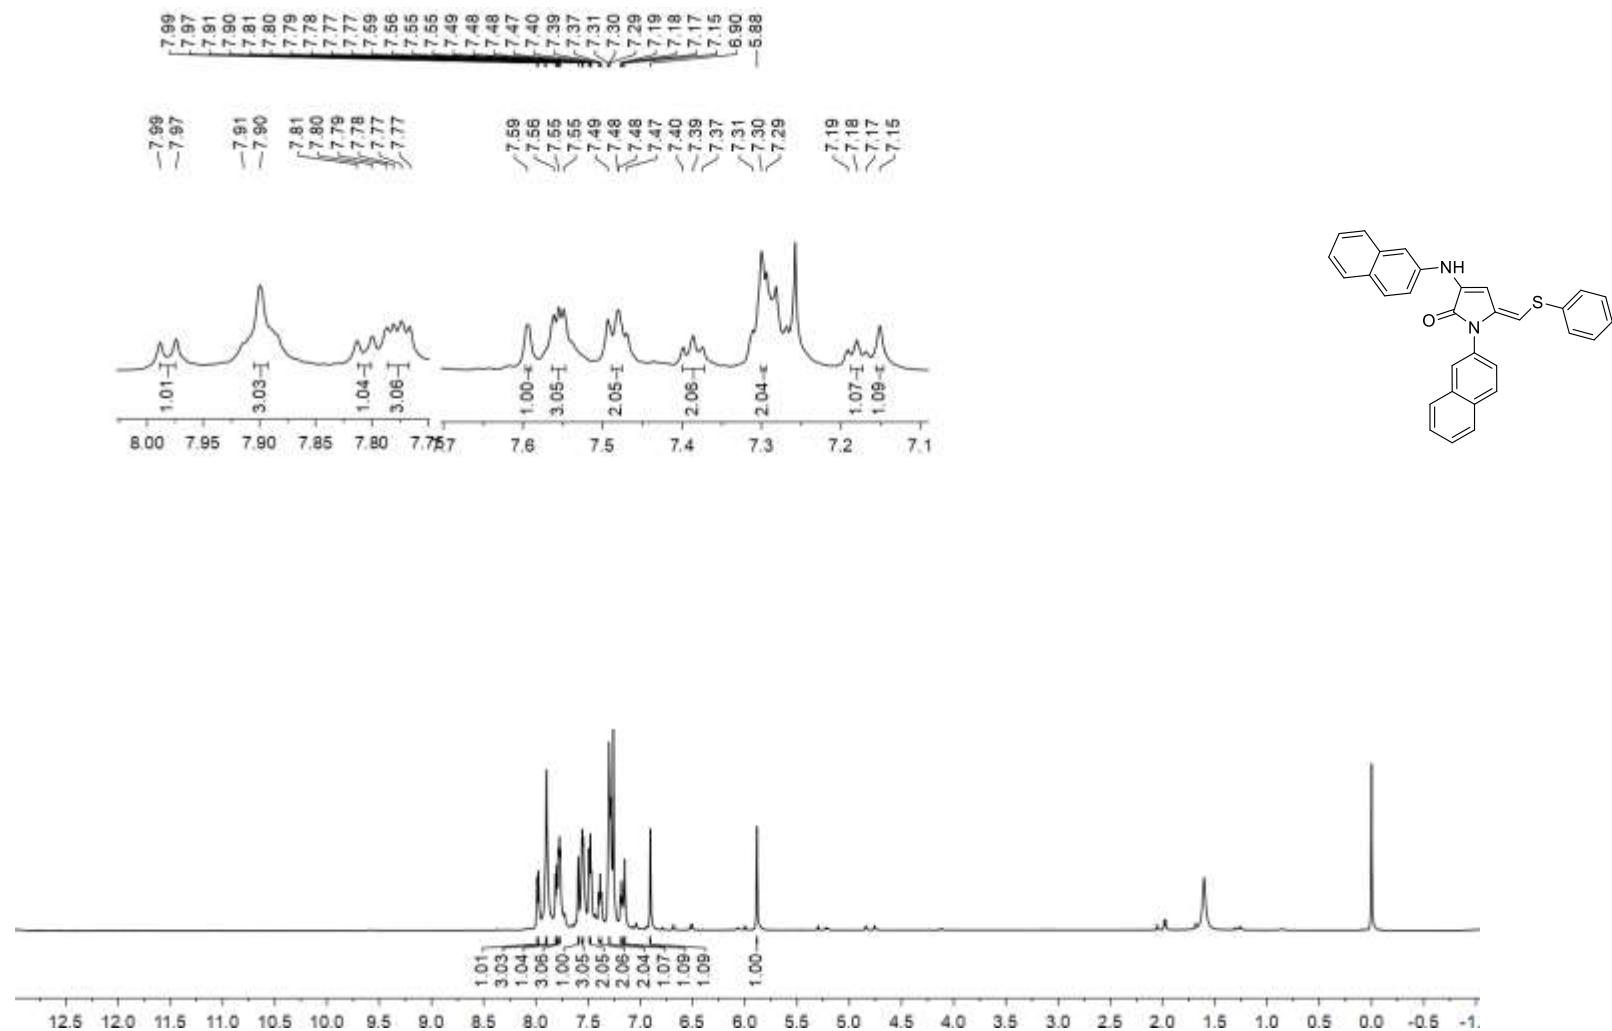

Figure S22. <sup>1</sup>H NMR (600 MHz, CDCl<sub>3</sub>) spectra of compound **4j**

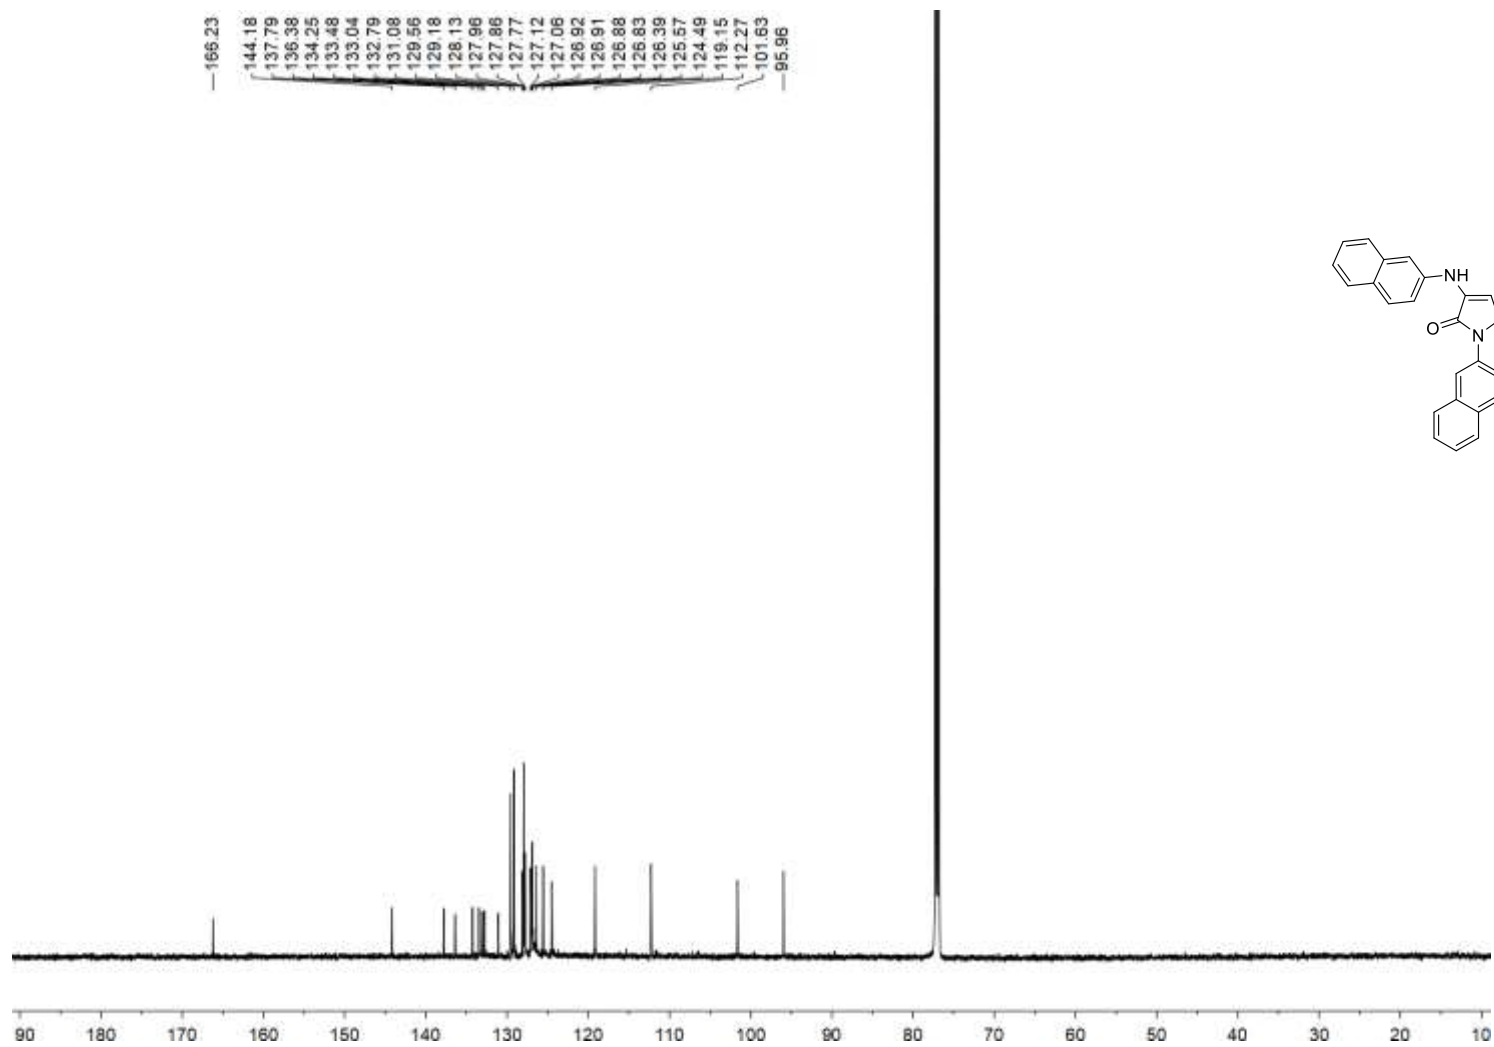

Figure S23.  $^{13}\text{C}$  NMR (150 MHz,  $\text{CDCl}_3$ ) spectra of compound **4j**

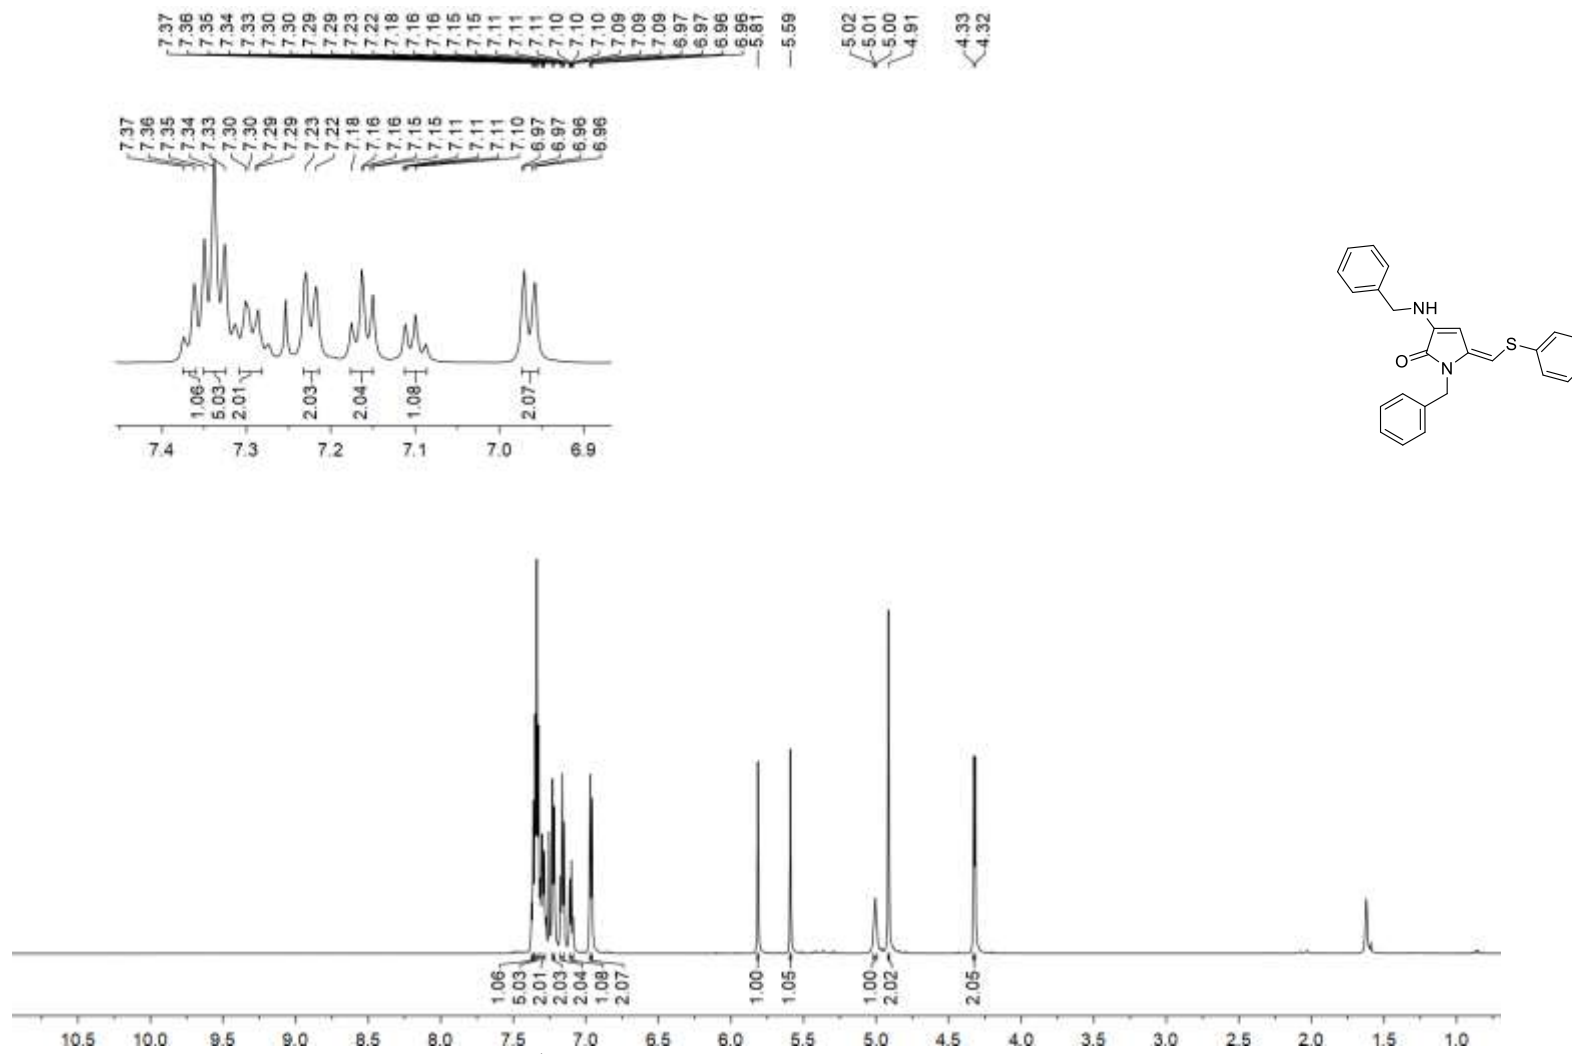

Figure S24.  $^1\text{H}$  NMR (600 MHz,  $\text{CDCl}_3$ ) spectra of compound **4k**



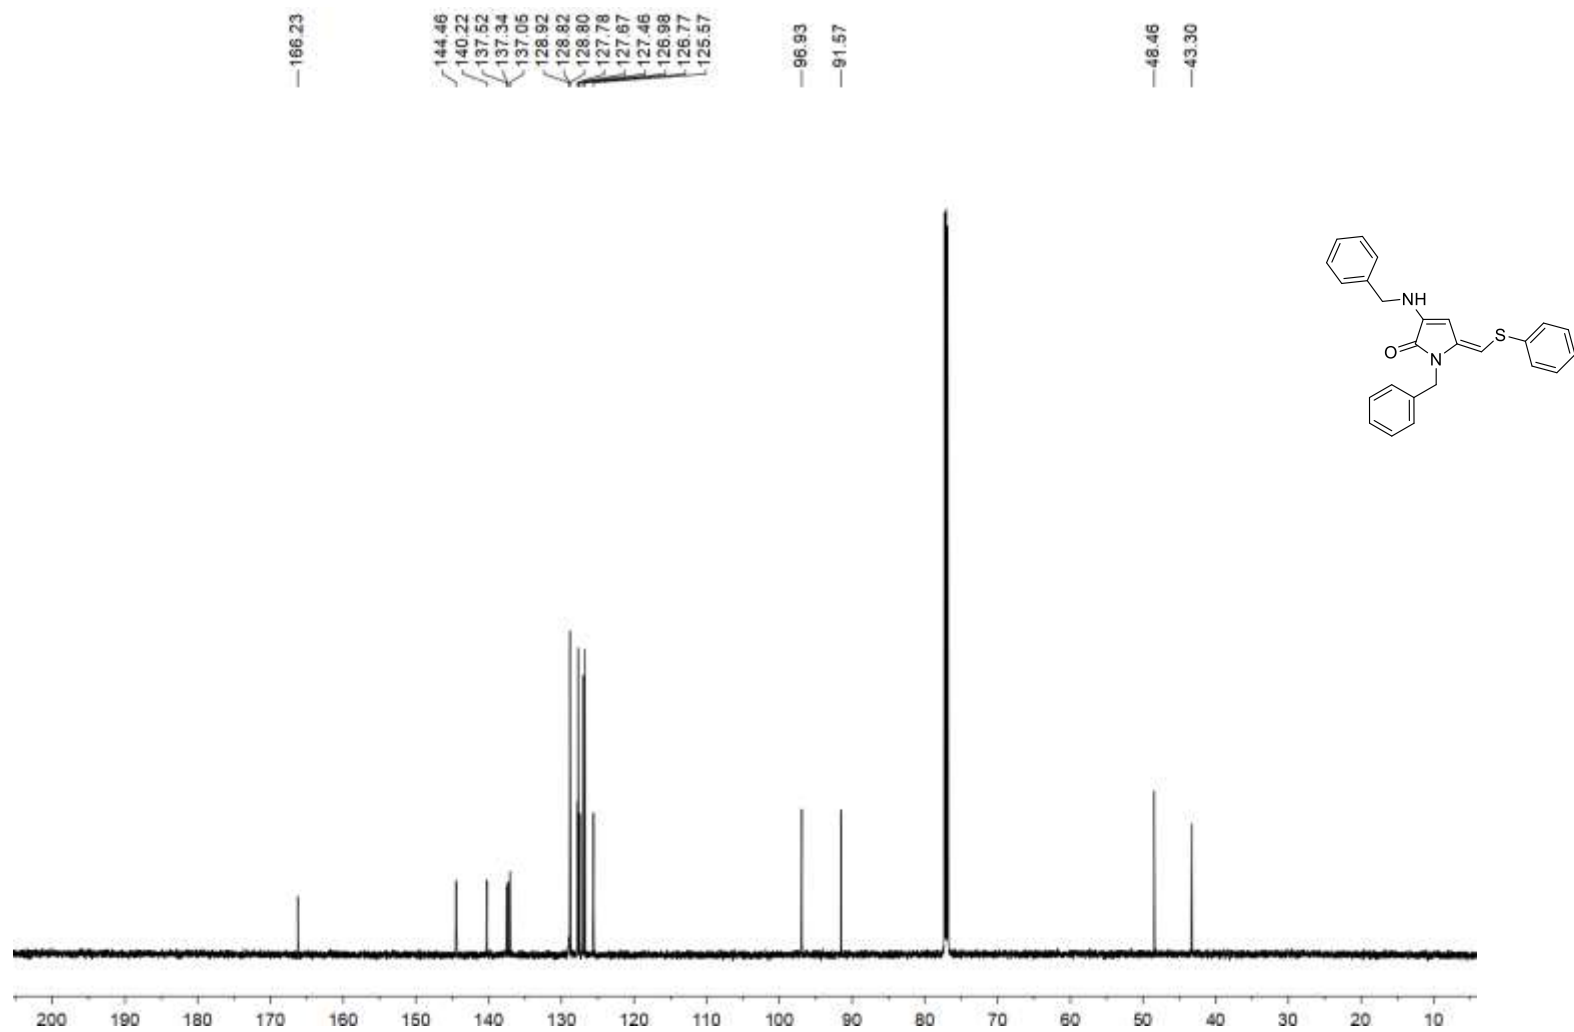

Figure S25. <sup>13</sup>C NMR (150 MHz, CDCl<sub>3</sub>) spectra of compound 4k

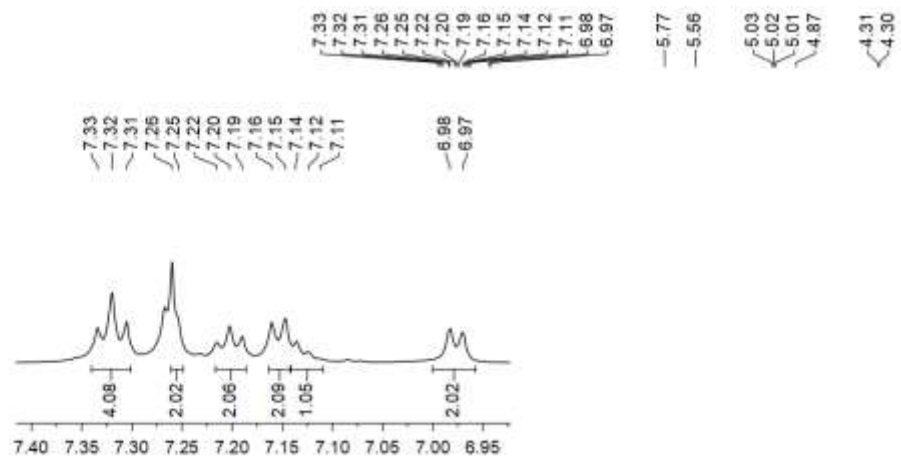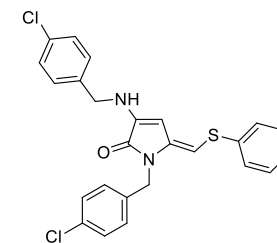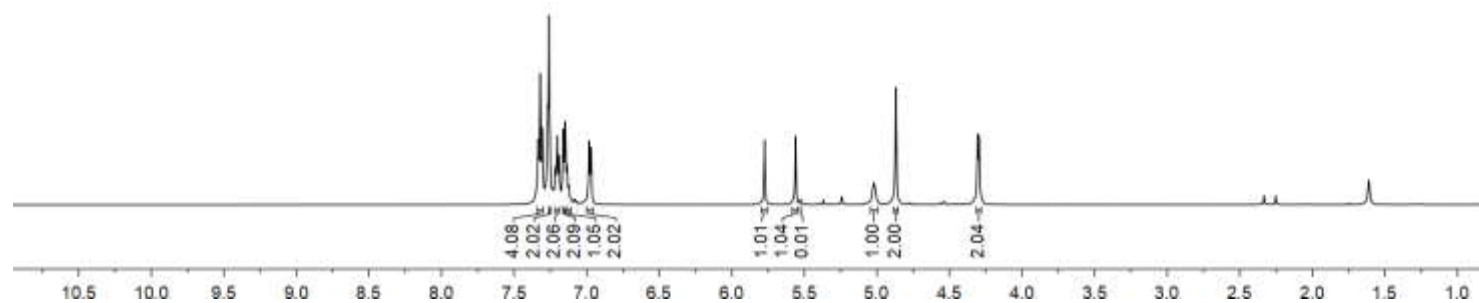

Figure S26.  $^1\text{H}$  NMR (600 MHz,  $\text{CDCl}_3$ ) spectra of compound **41**

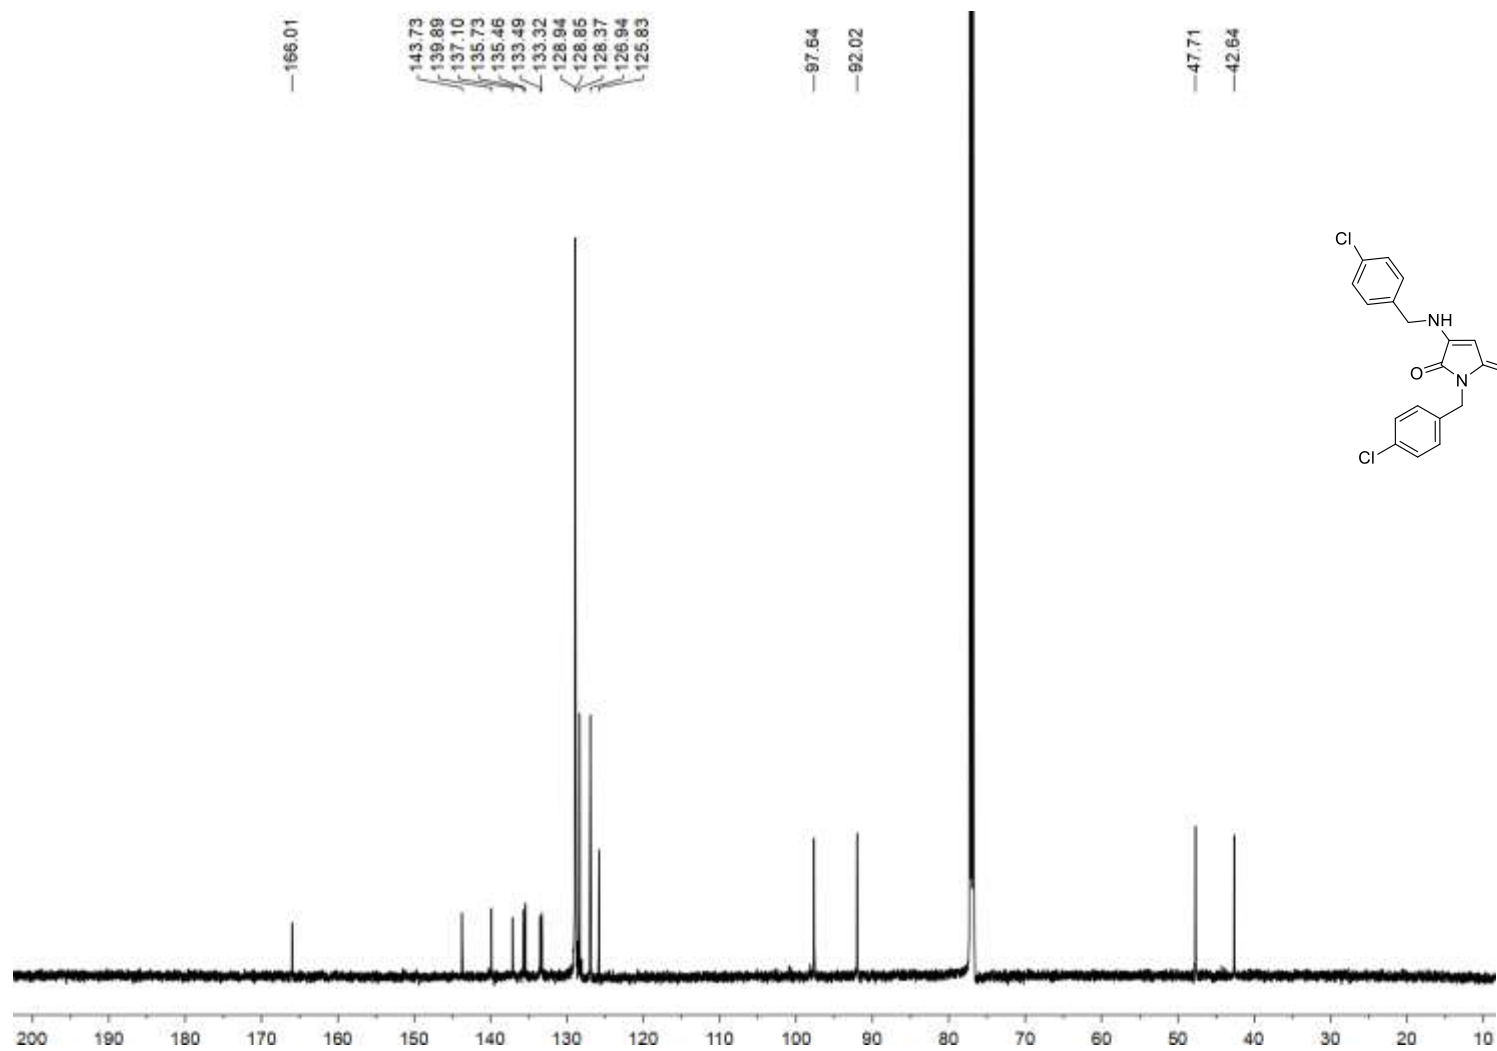

Figure S27.  $^{13}\text{C}$  NMR (150 MHz,  $\text{CDCl}_3$ ) spectra of compound **4i**

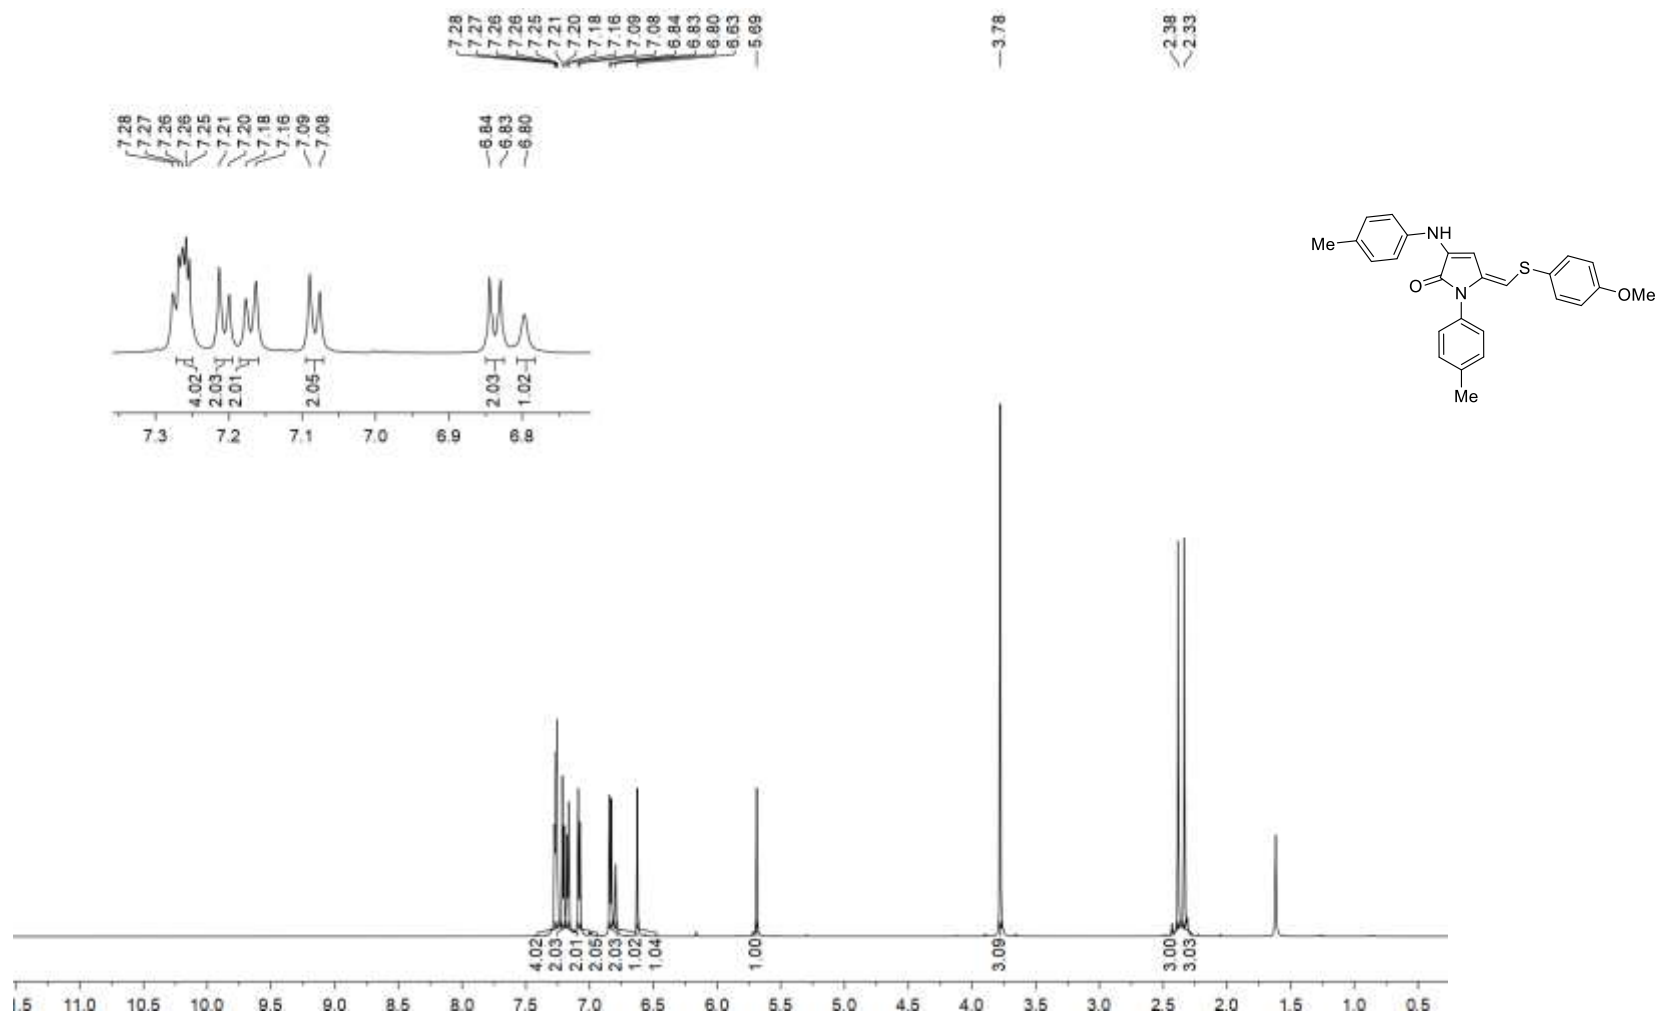

Figure S28. <sup>1</sup>H NMR (600 MHz, CDCl<sub>3</sub>) spectra of compound **4m**

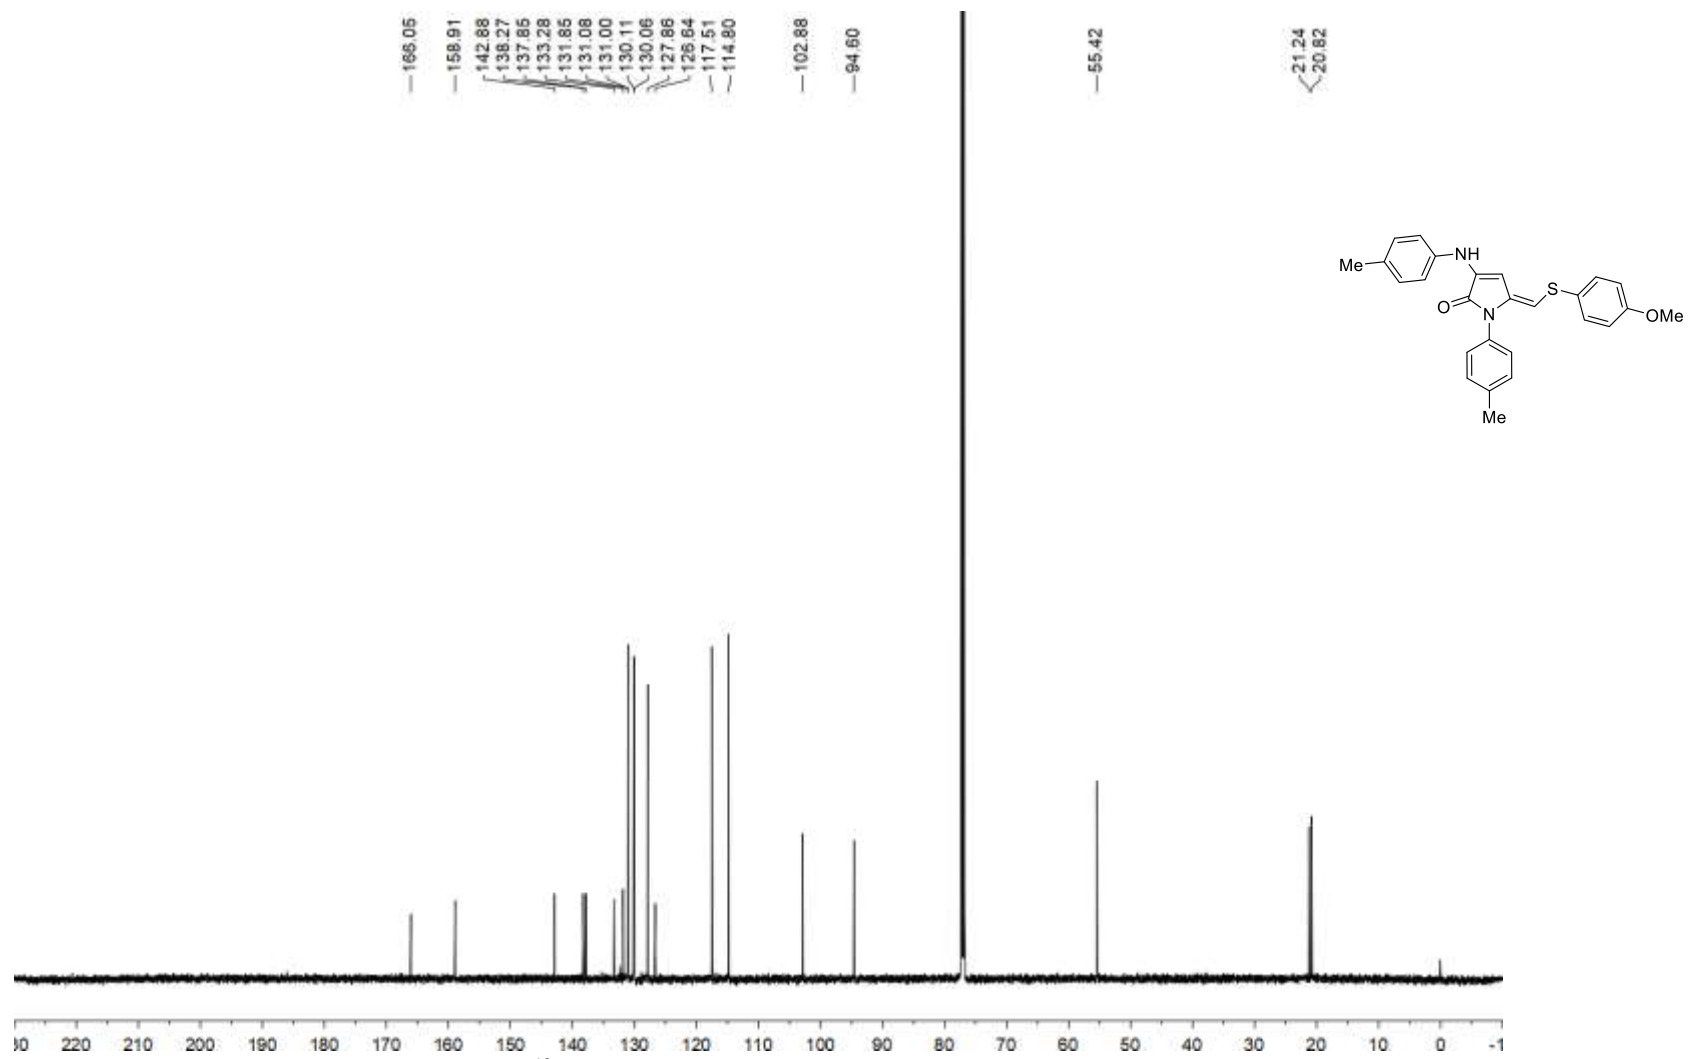

Figure S29.  $^{13}\text{C}$  NMR (150 MHz,  $\text{CDCl}_3$ ) spectra of compound **4m**

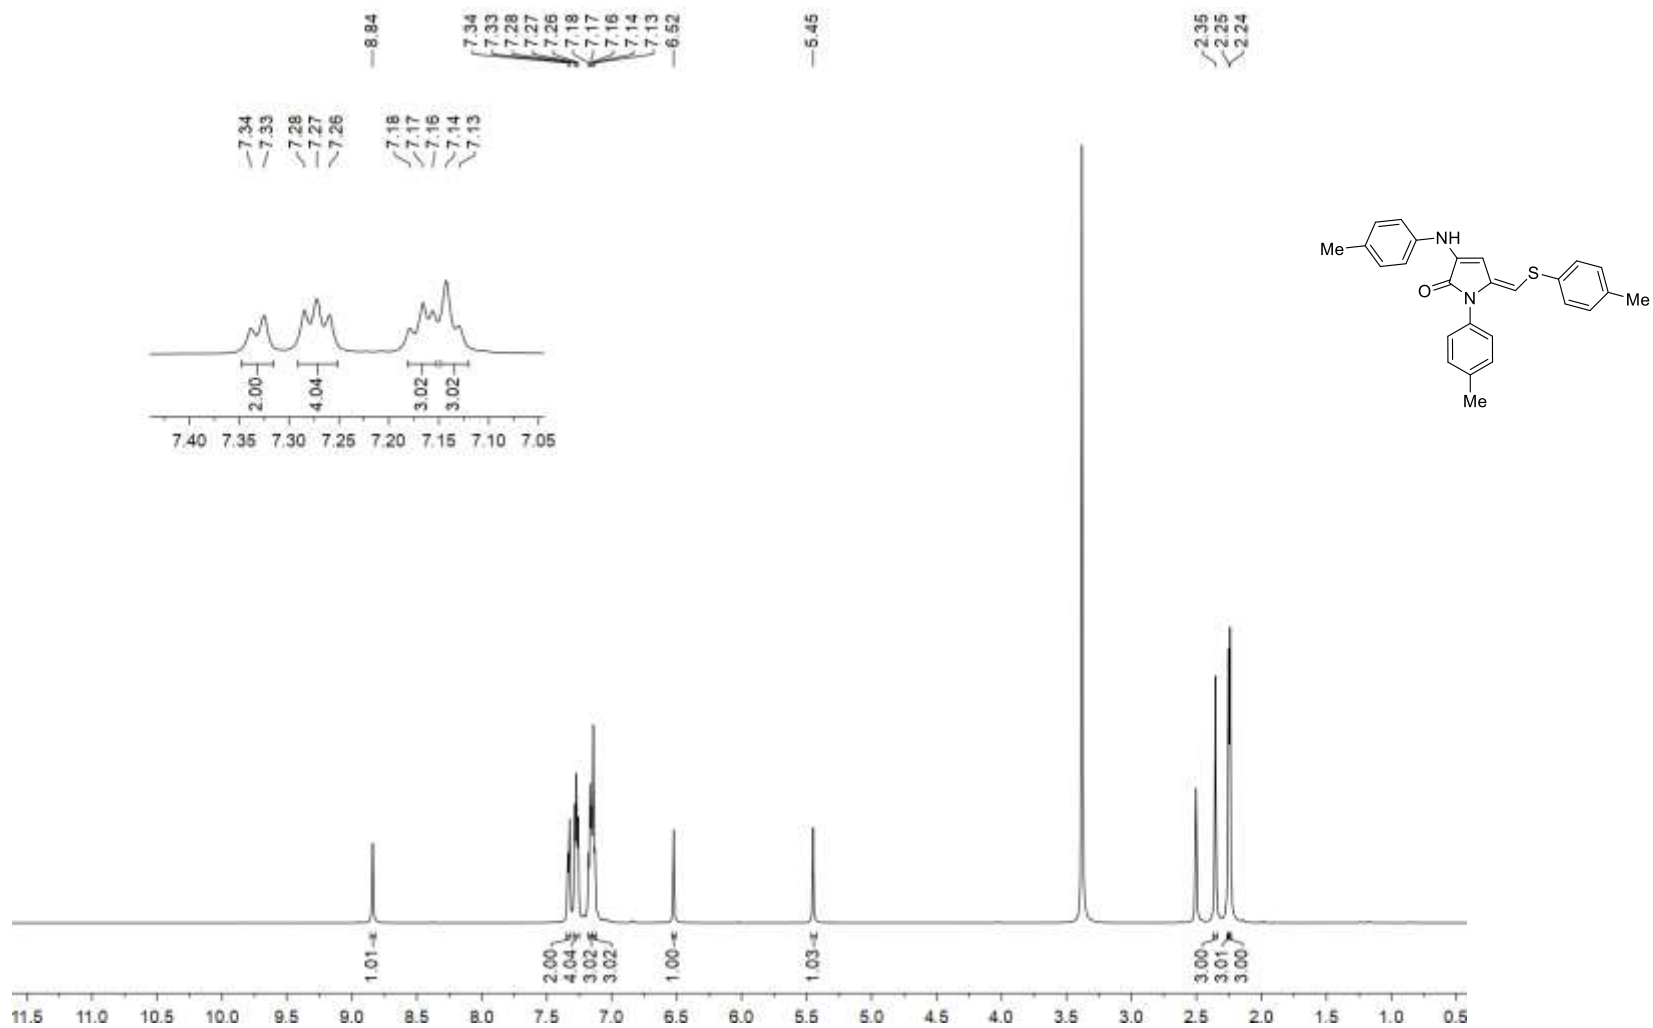

**Figure S30.**  $^1\text{H}$  NMR (600 MHz,  $\text{DMSO-}d_6$ ) spectra of compound **4n**

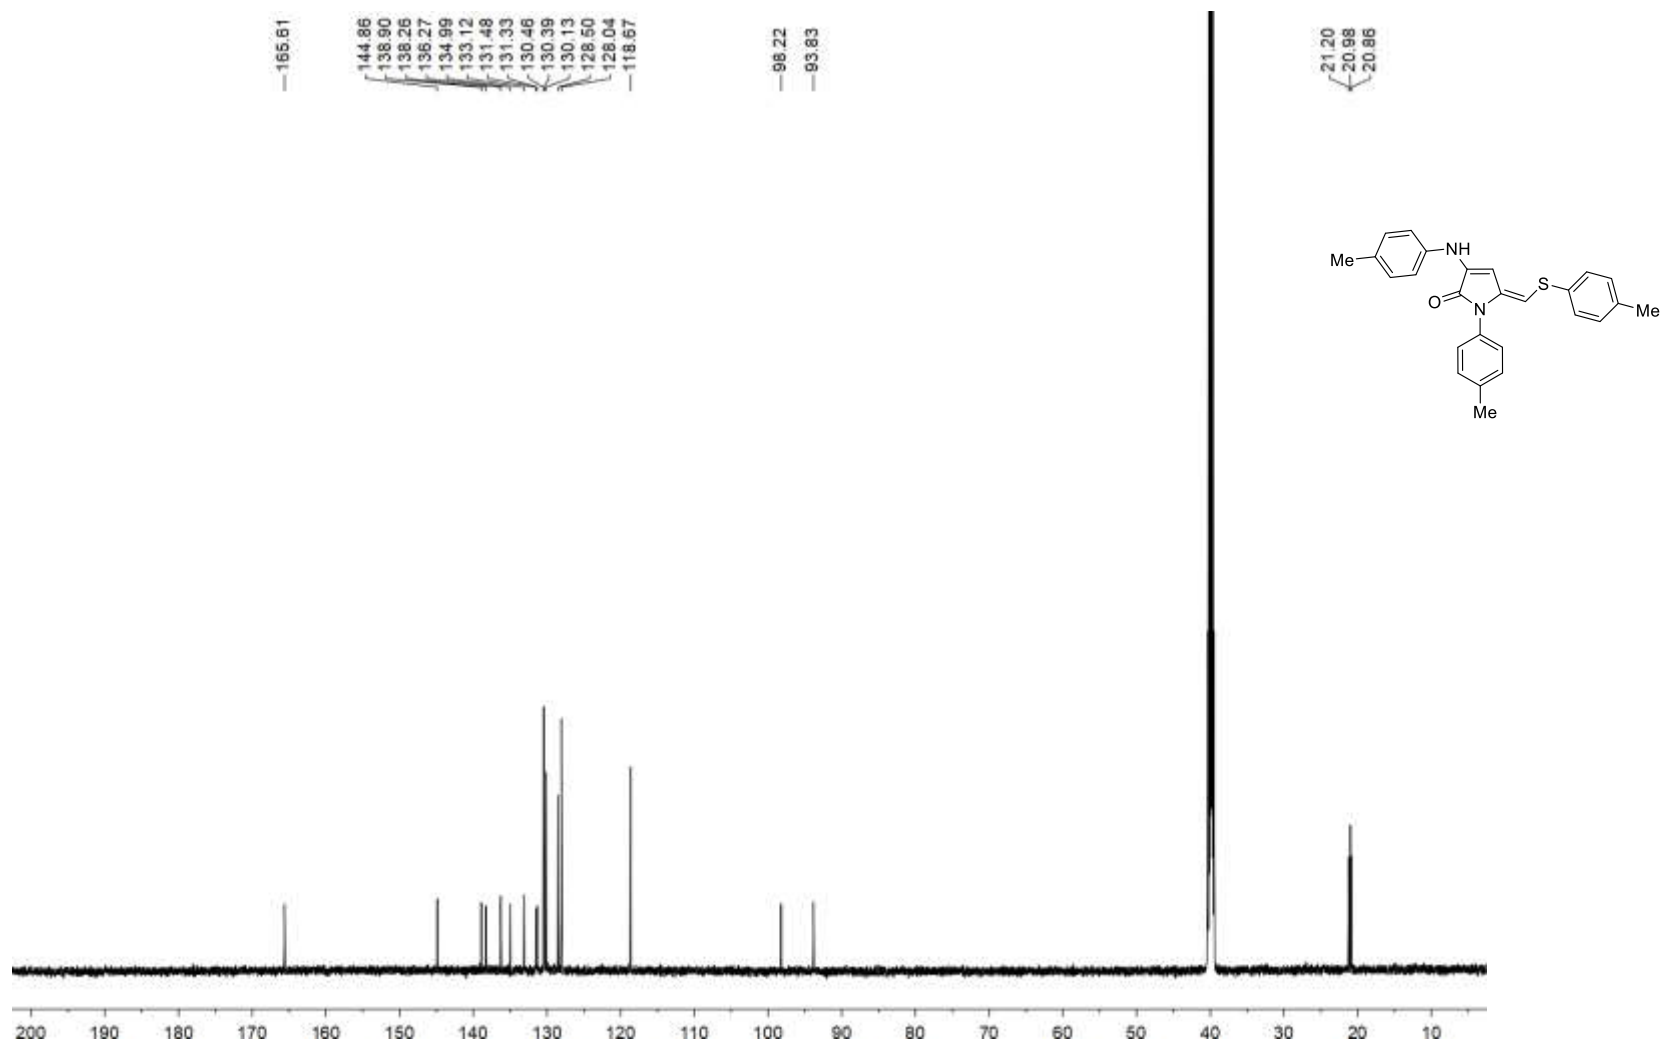

Figure S31. <sup>13</sup>C NMR (150 MHz, DMSO-*d*<sub>6</sub>) spectra of compound 4n

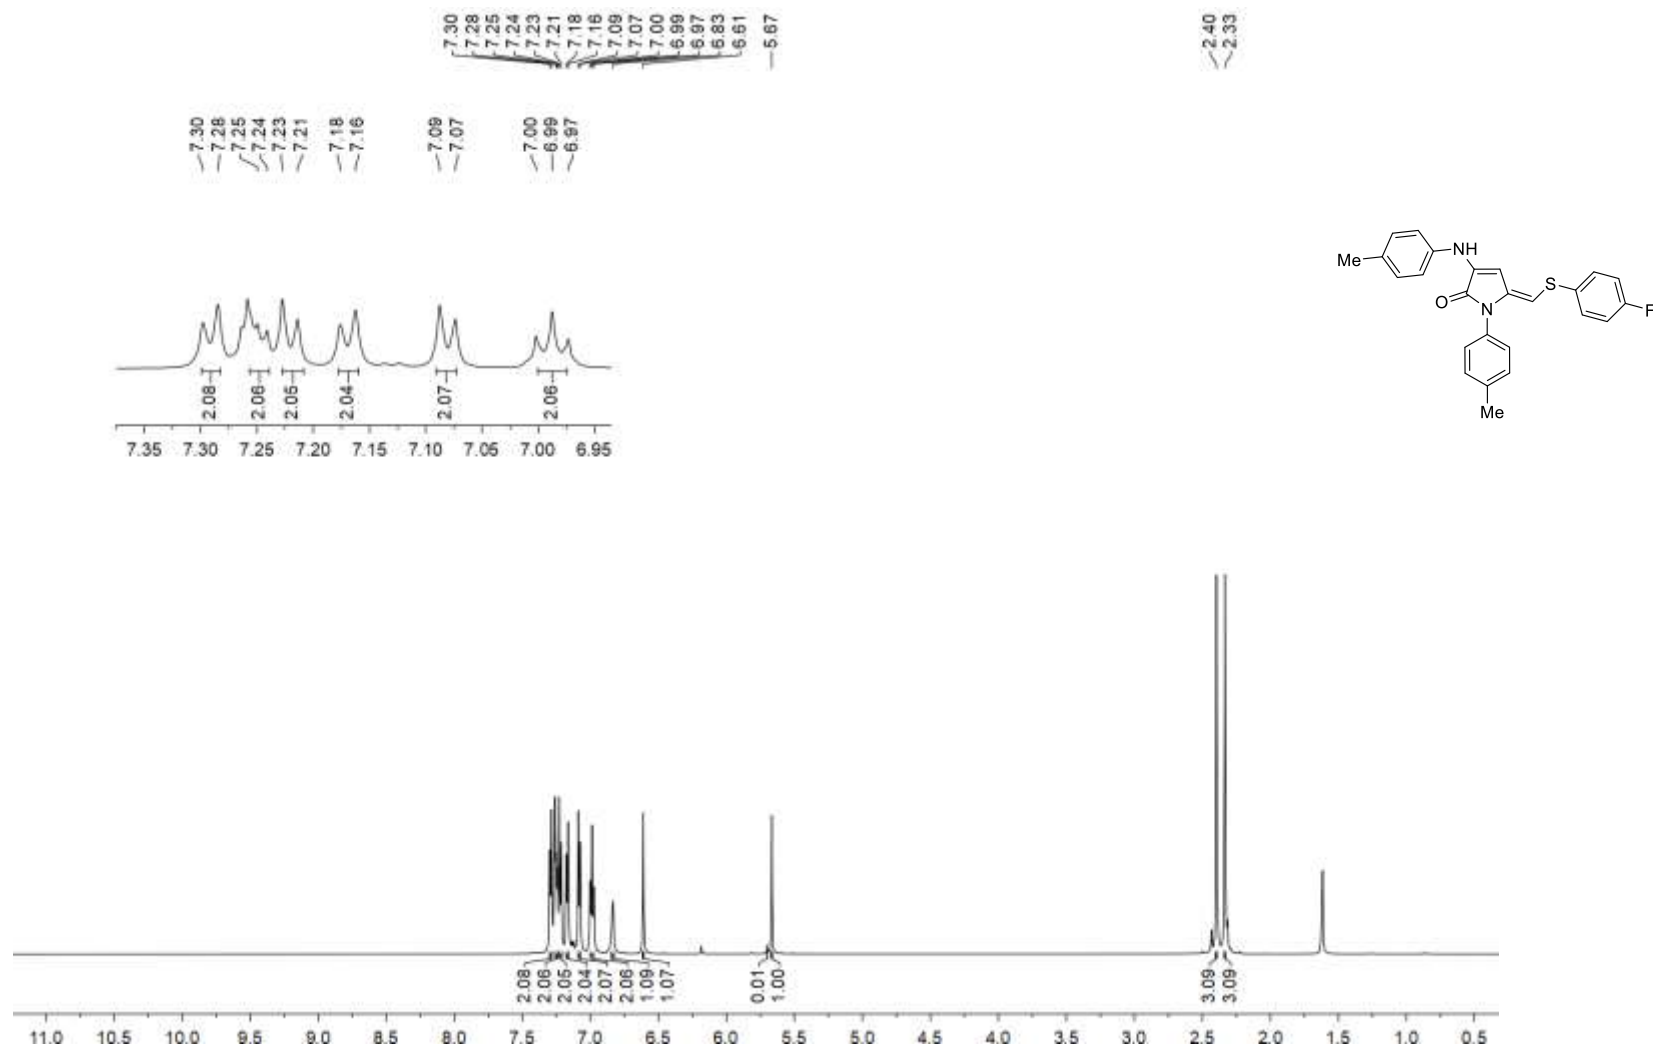

**Figure S32.**  $^1\text{H}$  NMR (600 MHz,  $\text{CDCl}_3$ ) spectra of compound **4o**



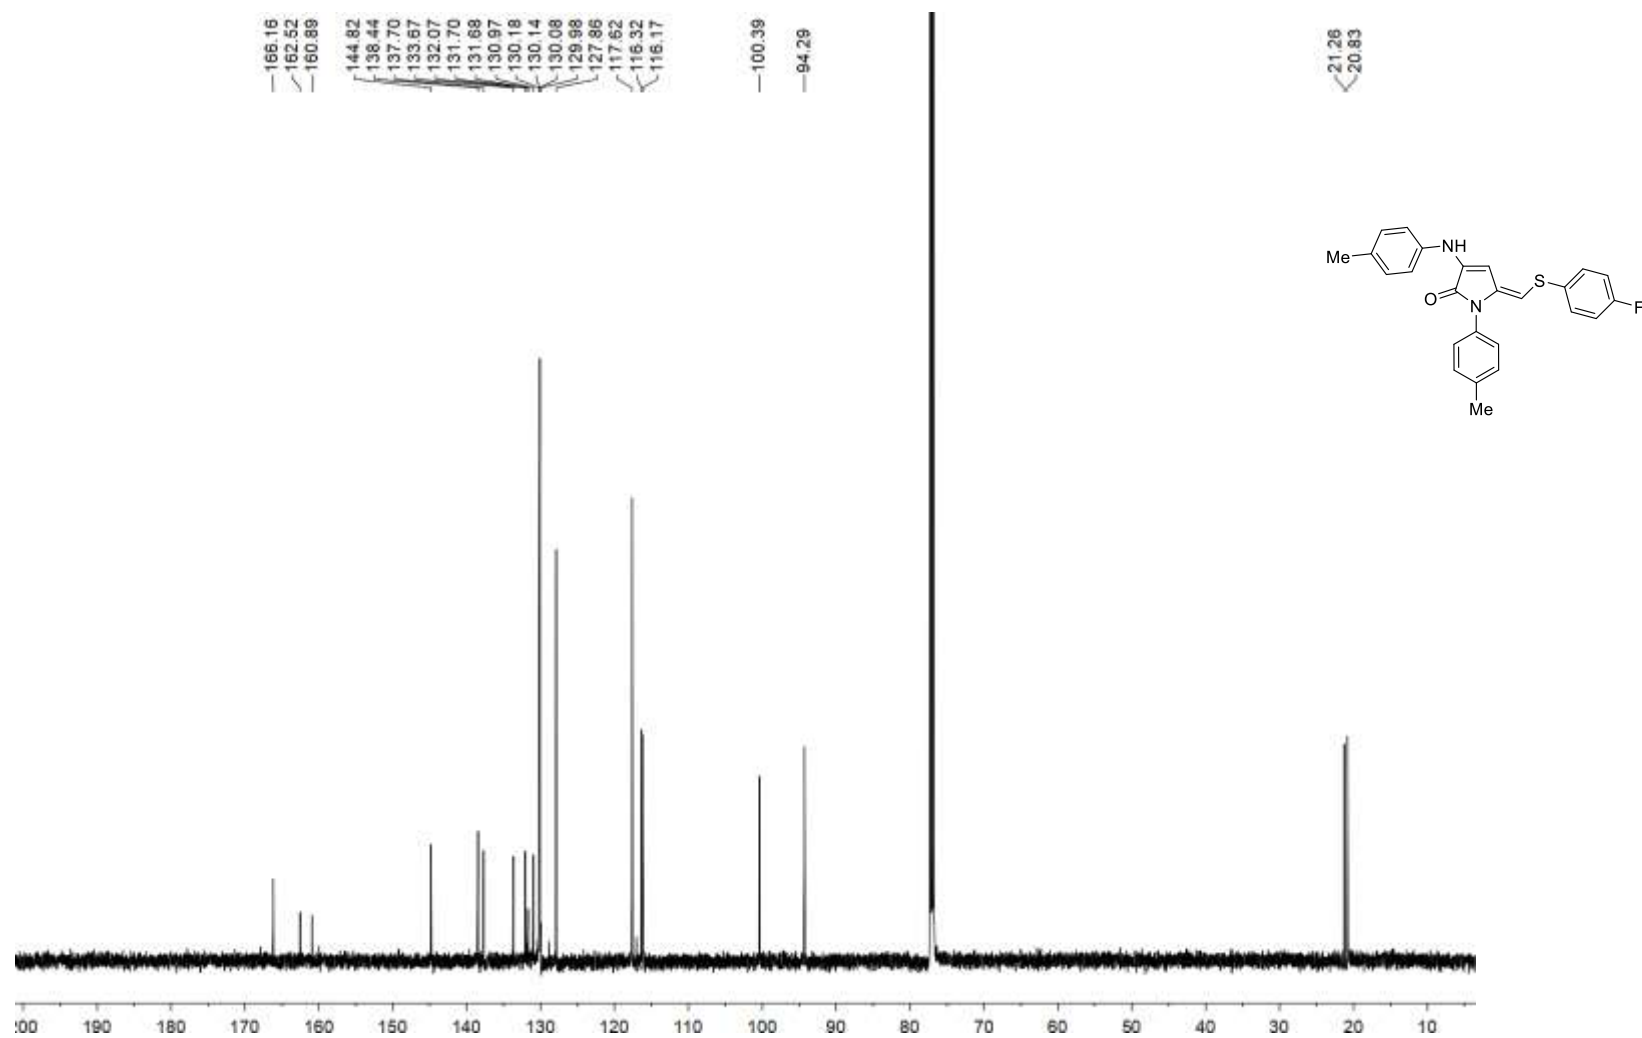

Figure S33. <sup>13</sup>C NMR (150 MHz, CDCl<sub>3</sub>) spectra of compound 4o

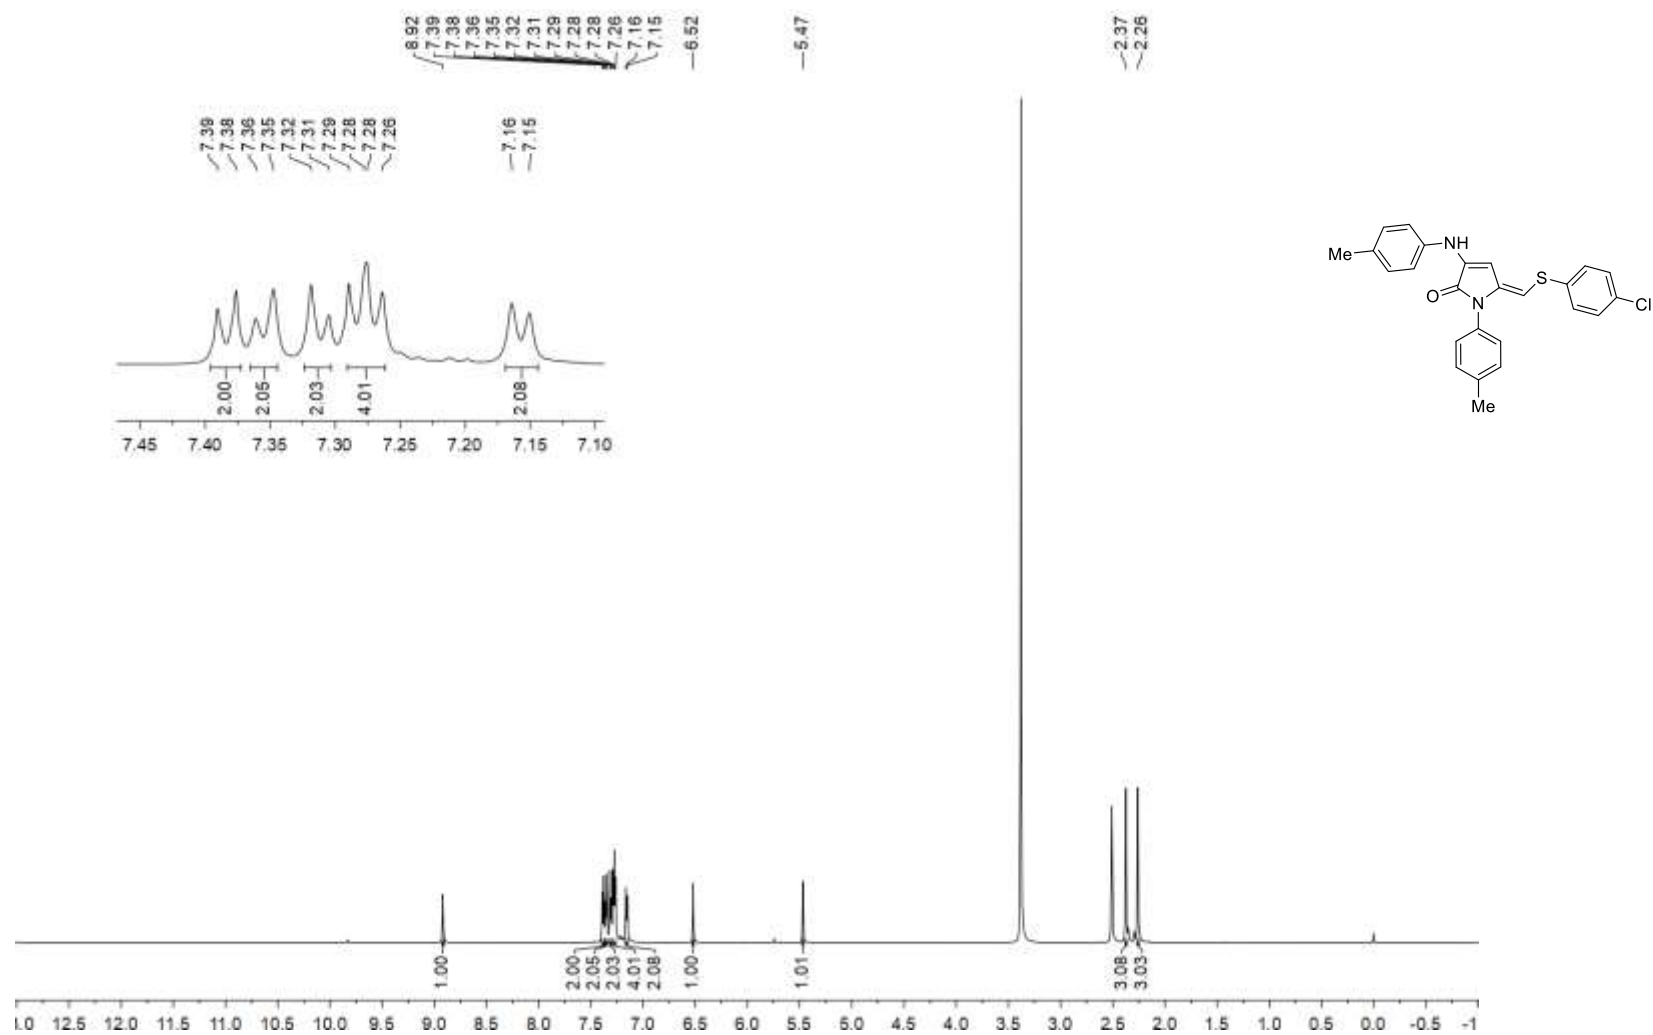

Figure S34.  $^1\text{H}$  NMR (600 MHz,  $\text{DMSO-}d_6$ ) spectra of compound **4p**

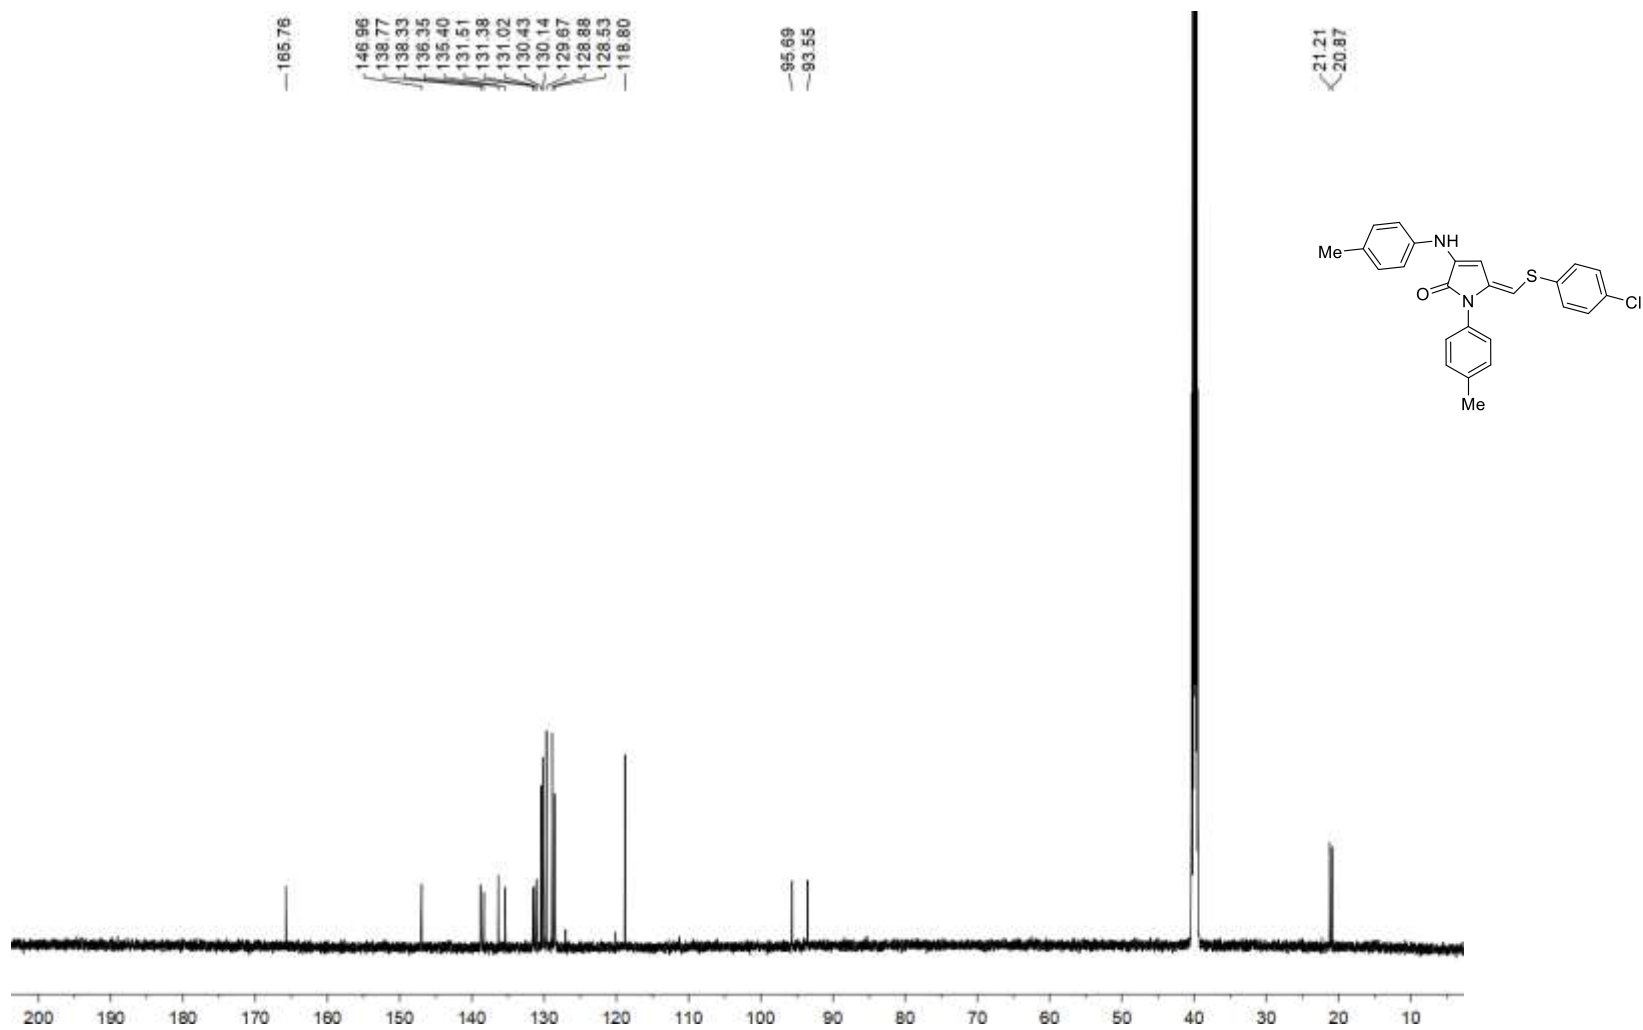

Figure S35.  $^{13}\text{C}$  NMR (150 MHz,  $\text{DMSO-}d_6$ ) spectra of compound 4p

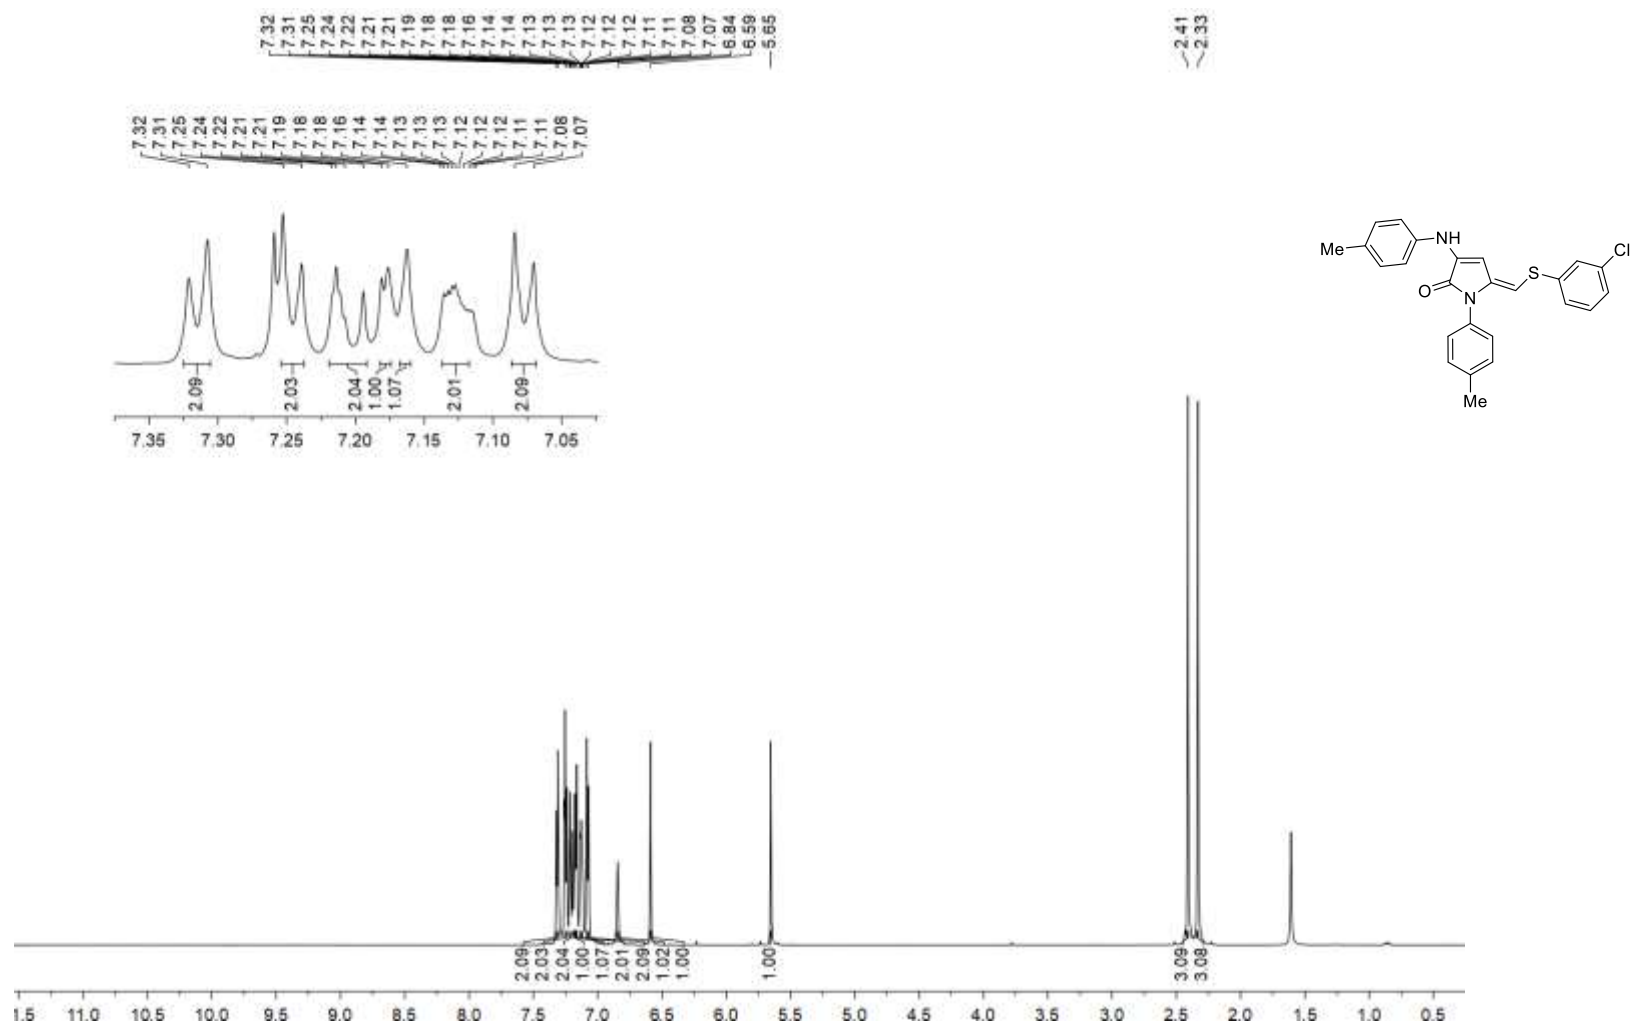

Figure S36.  $^1\text{H}$  NMR (600 MHz,  $\text{CDCl}_3$ ) spectra of compound **4q**

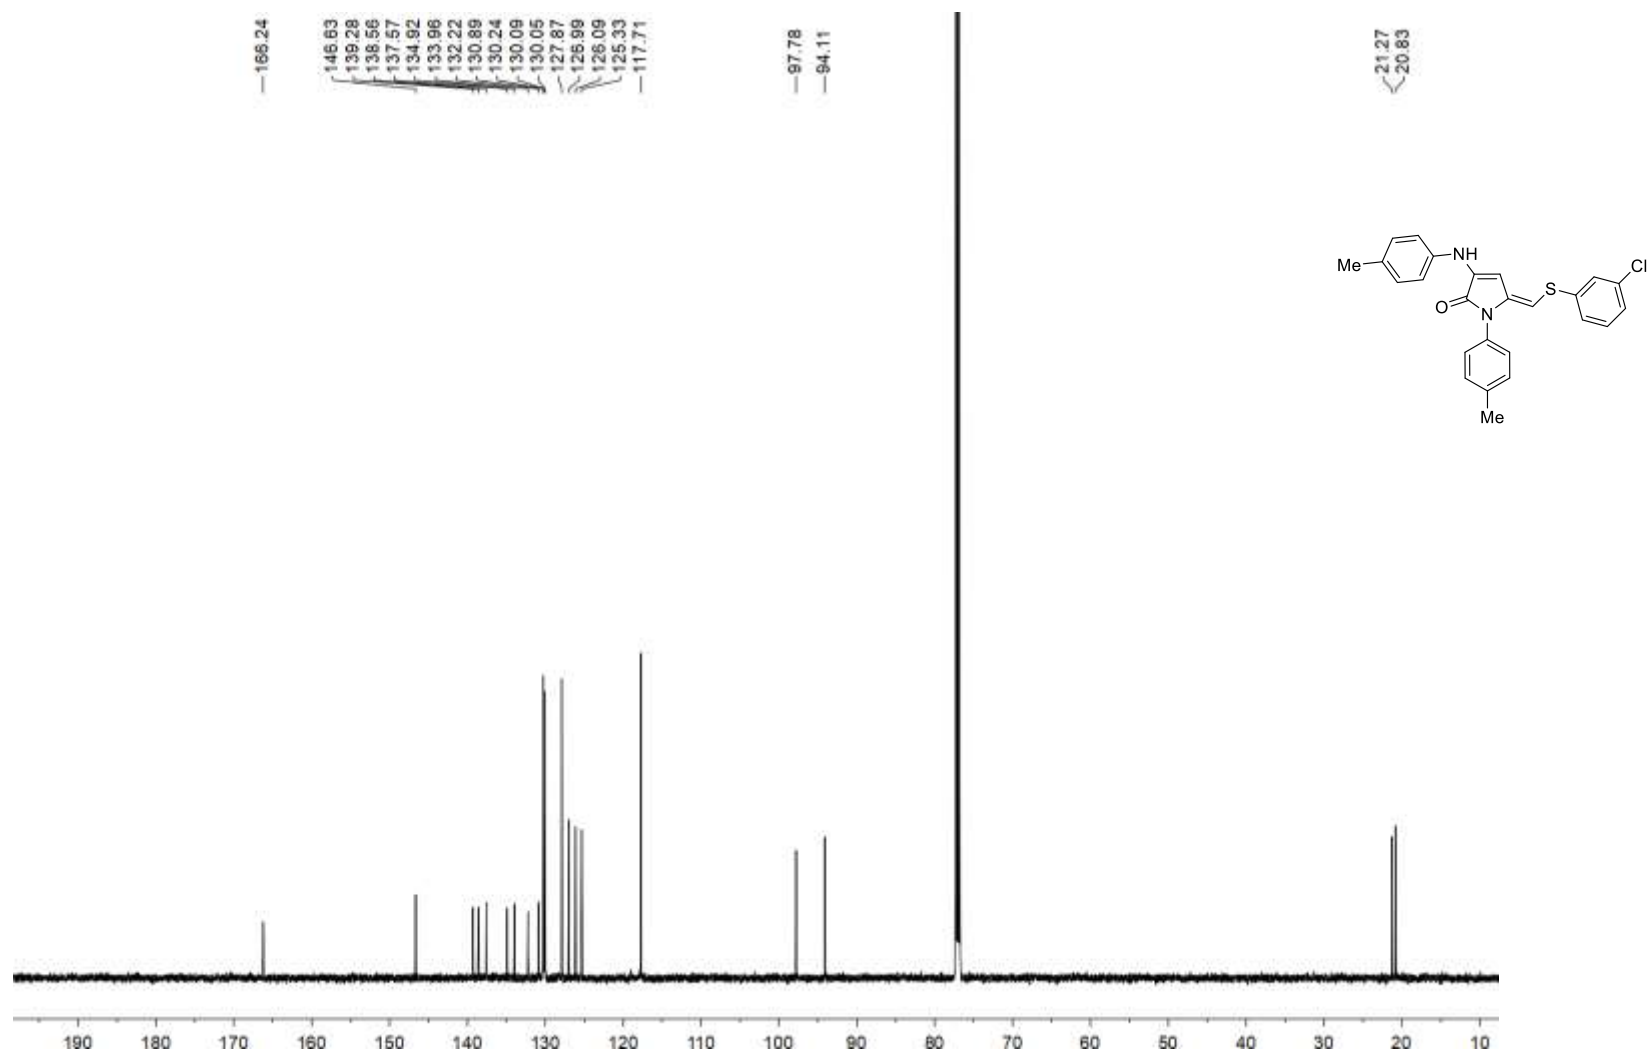

Figure S37.  $^{13}\text{C}$  NMR (150 MHz,  $\text{CDCl}_3$ ) spectra of compound 4q

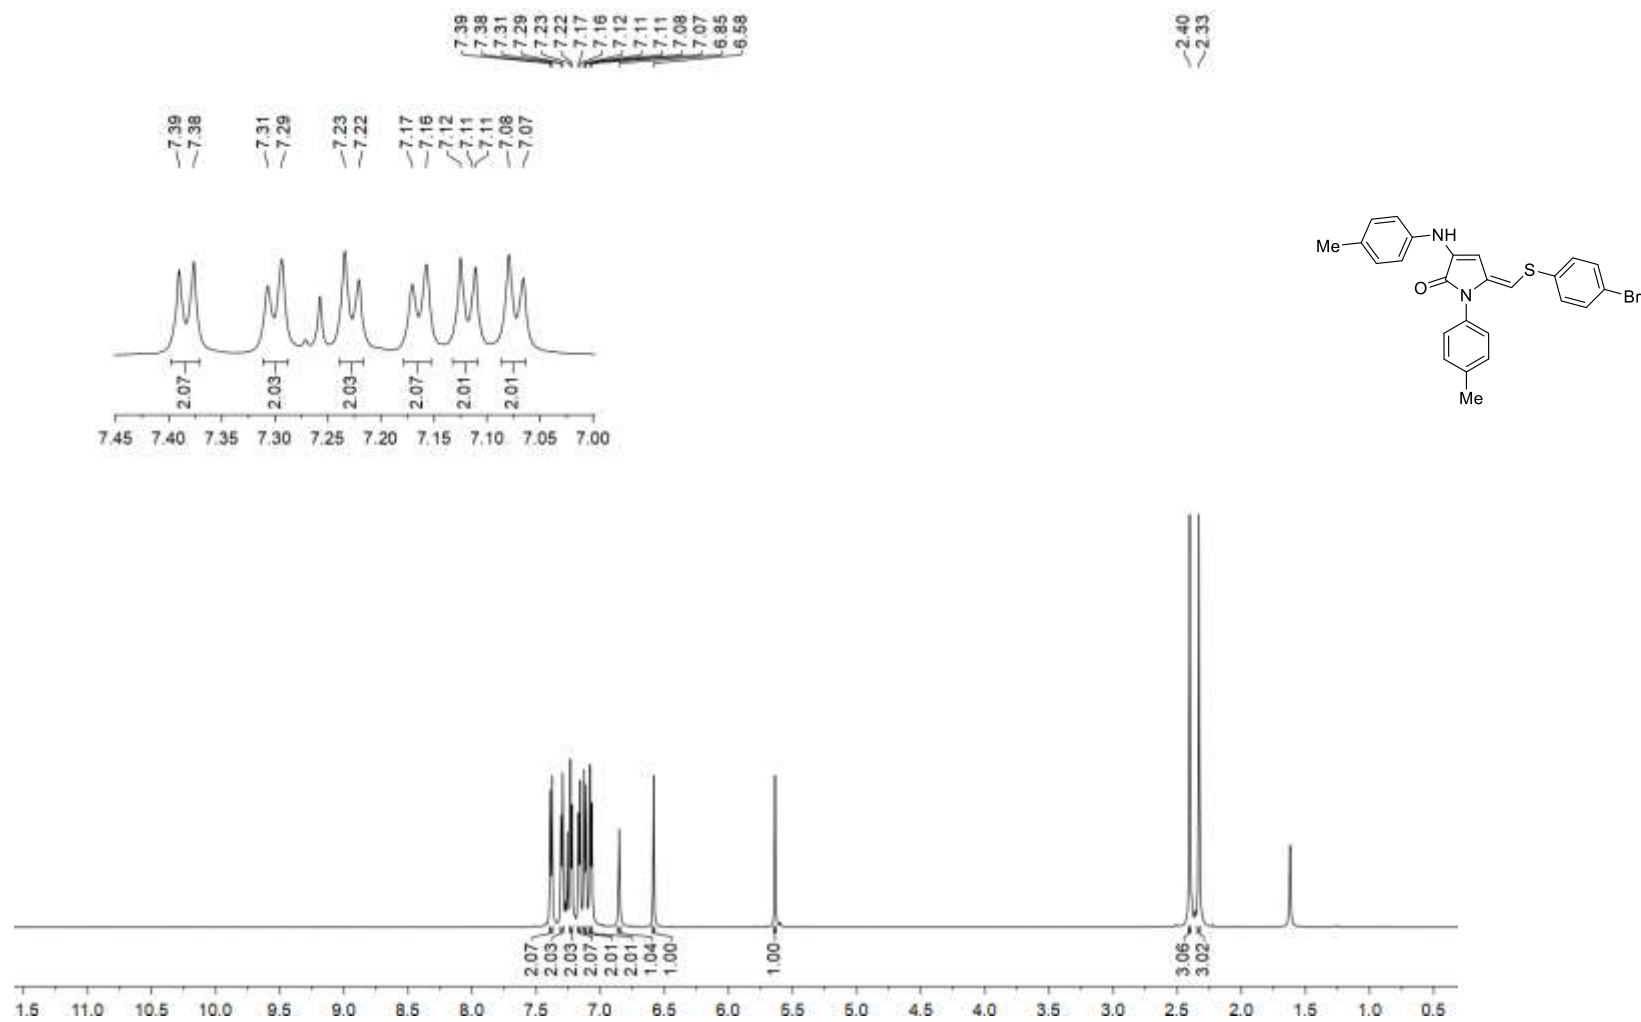

**Figure S38.** <sup>1</sup>H NMR (600 MHz, CDCl<sub>3</sub>) spectra of compound **4r**

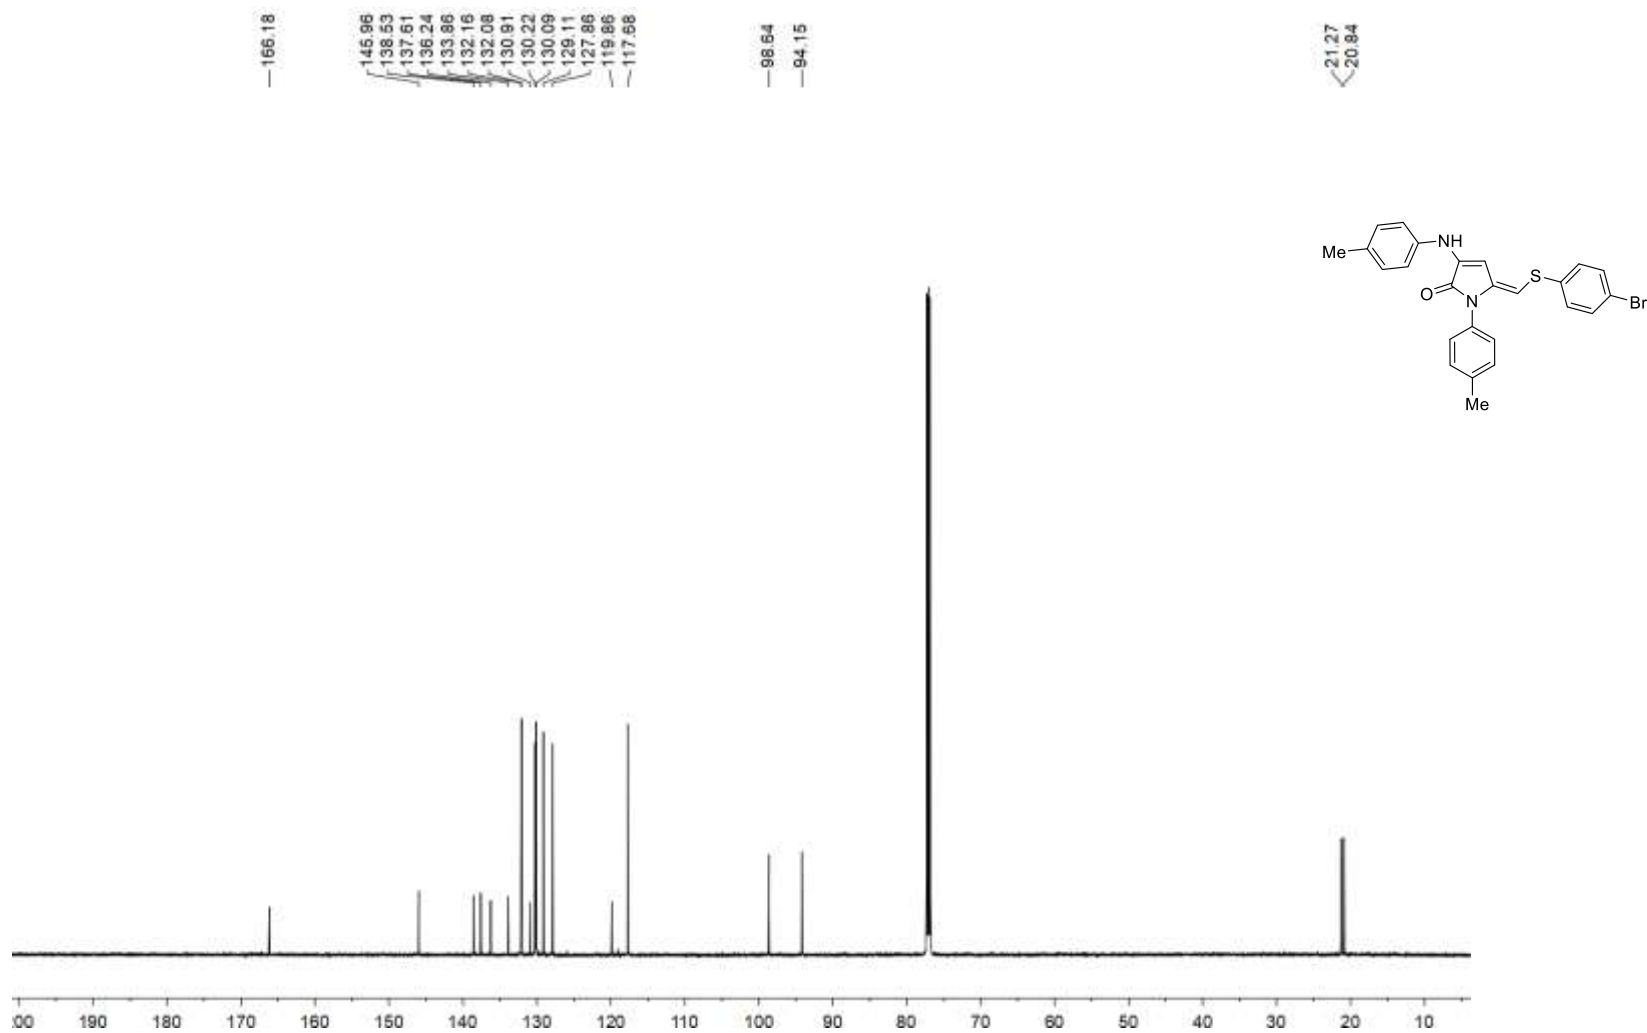

Figure S39. <sup>13</sup>C NMR (150 MHz, CDCl<sub>3</sub>) spectra of compound 4r

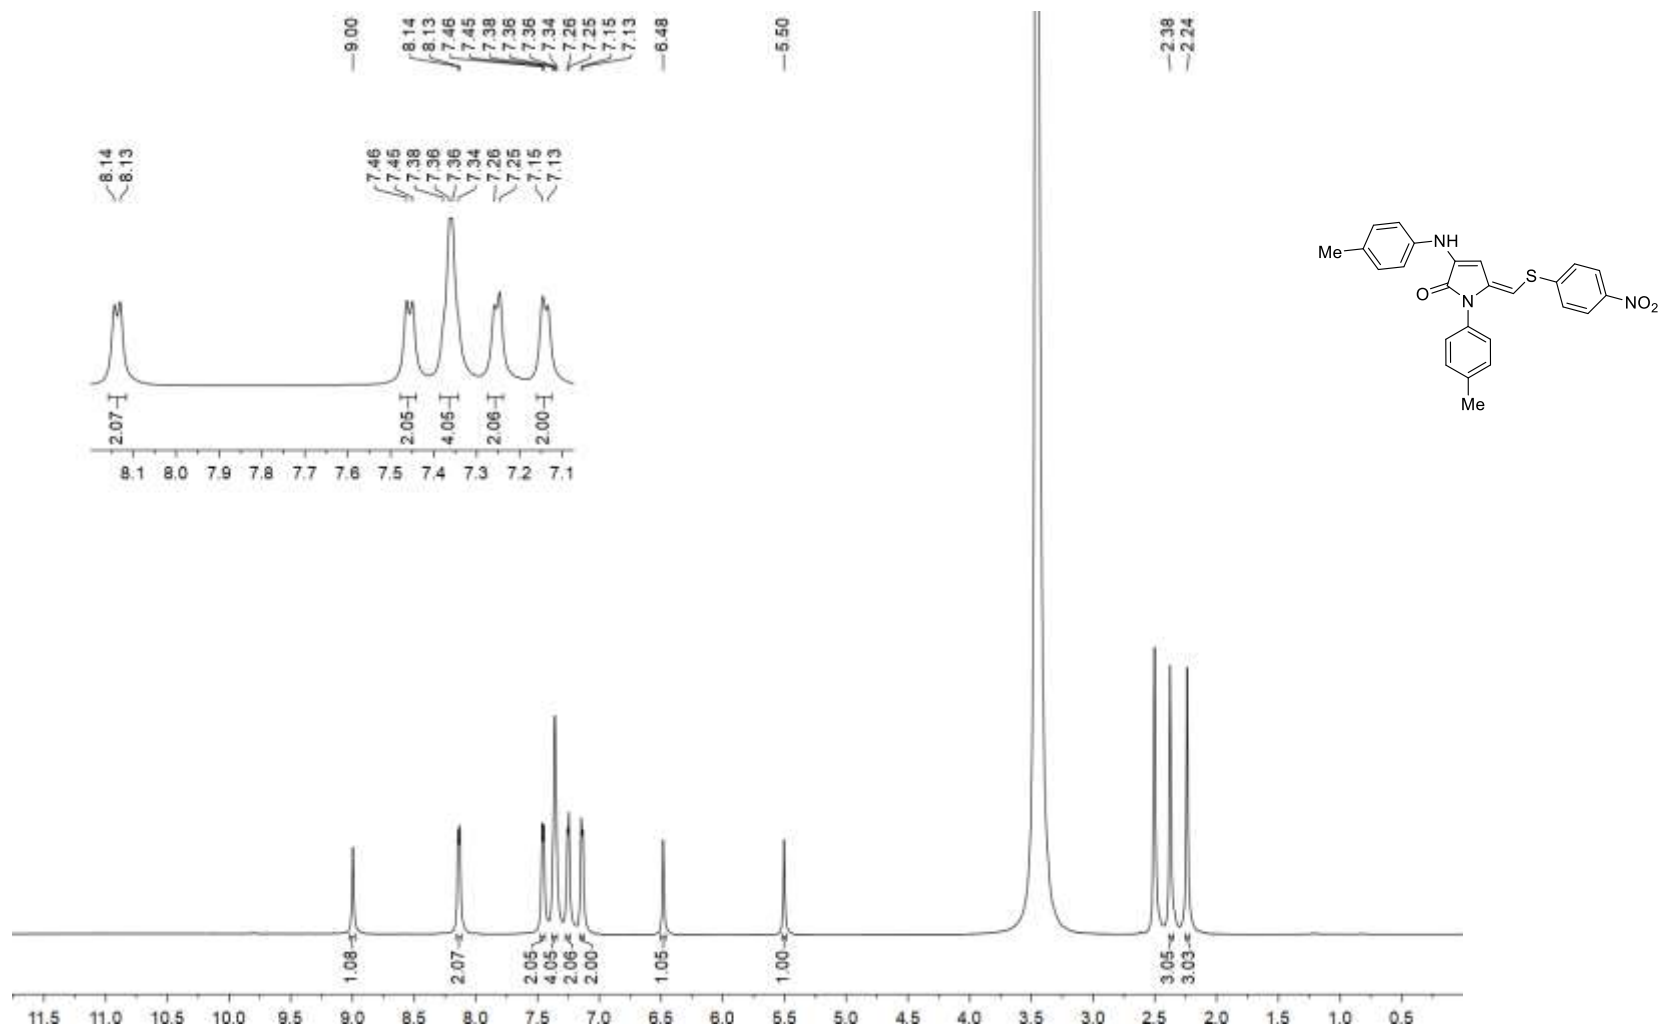

**Figure S40.** <sup>1</sup>H NMR (600 MHz, DMSO-*d*<sub>6</sub>) spectra of compound **4s**



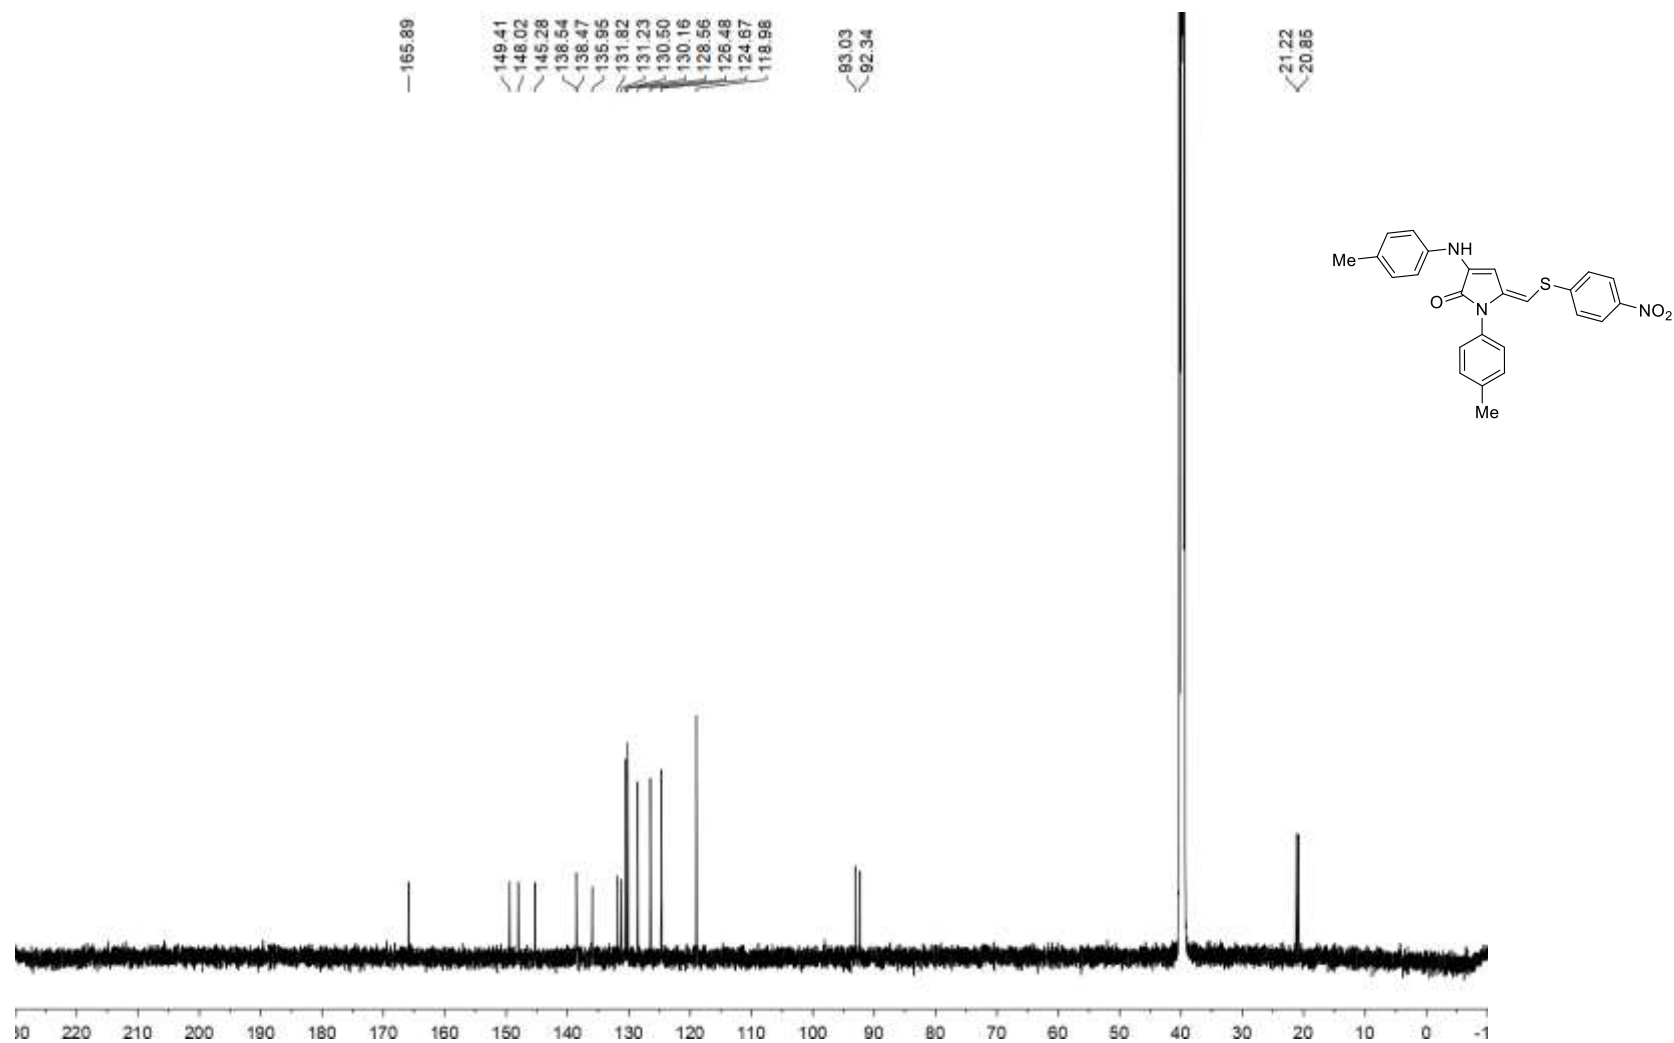

Figure S41. <sup>13</sup>C NMR (150 MHz, DMSO-*d*<sub>6</sub>) spectra of compound **4s**

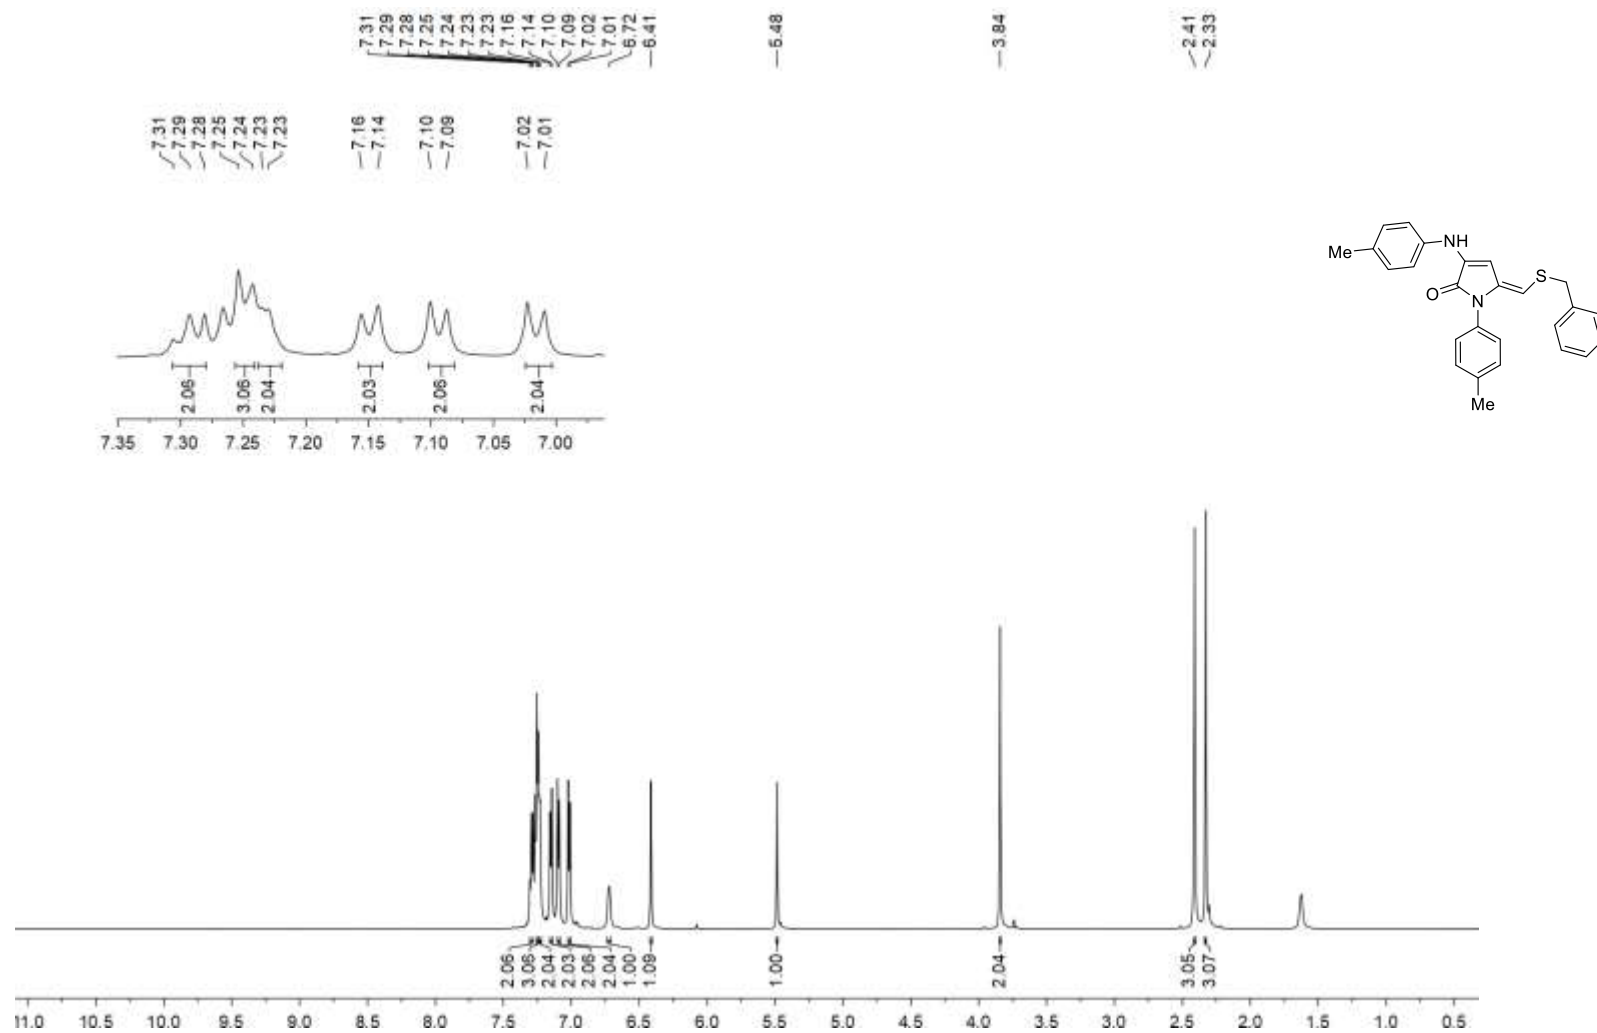

Figure S42. <sup>1</sup>H NMR (600 MHz, CDCl<sub>3</sub>) spectra of compound **4t**

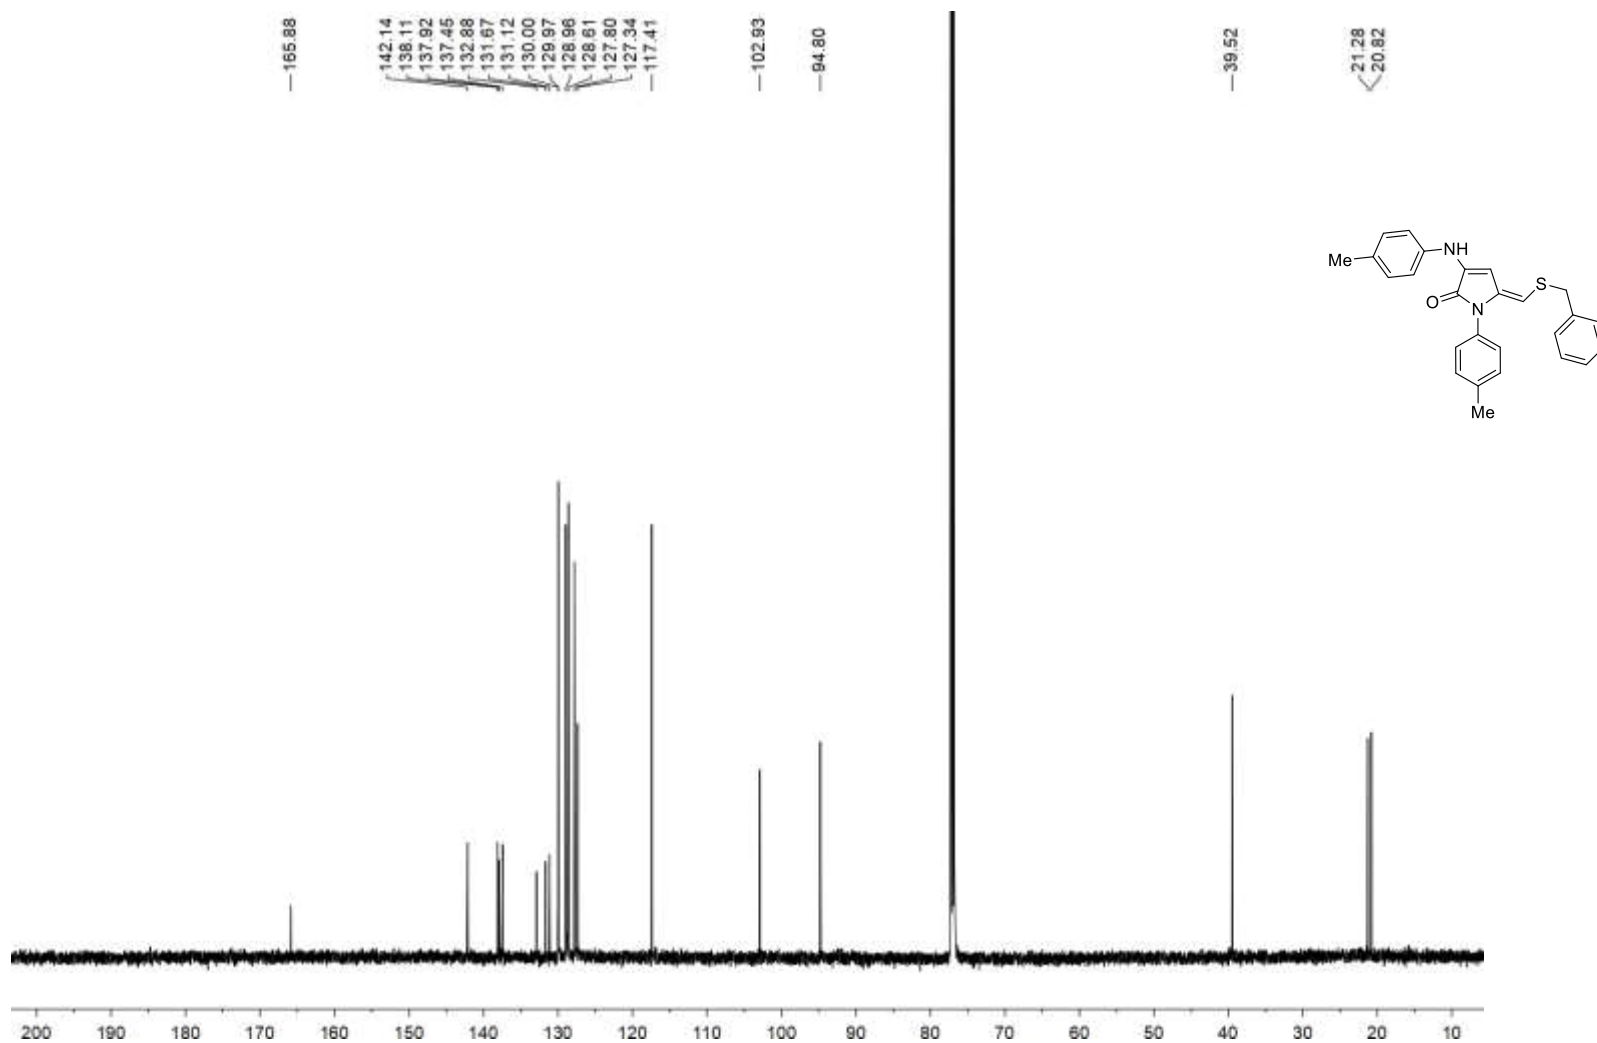

Figure S43. <sup>13</sup>C NMR (150 MHz, CDCl<sub>3</sub>) spectra of compound 4t

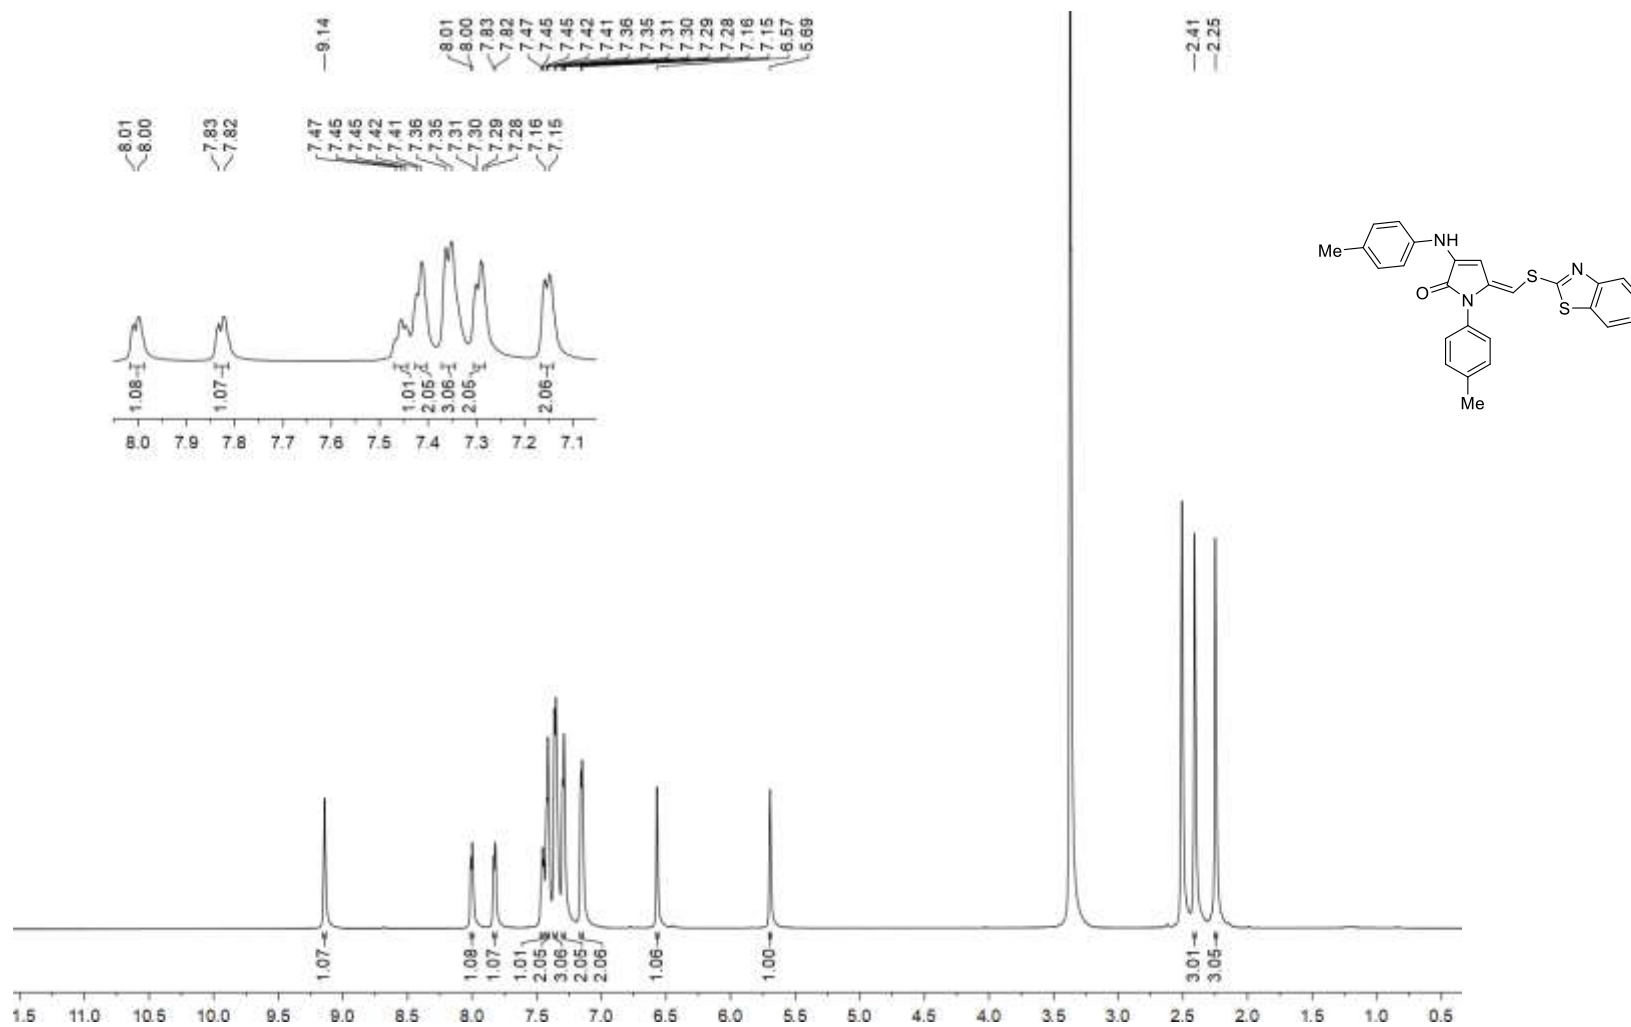

Figure S44.  $^1\text{H}$  NMR (600 MHz,  $\text{DMSO-}d_6$ ) spectra of compound **4u**

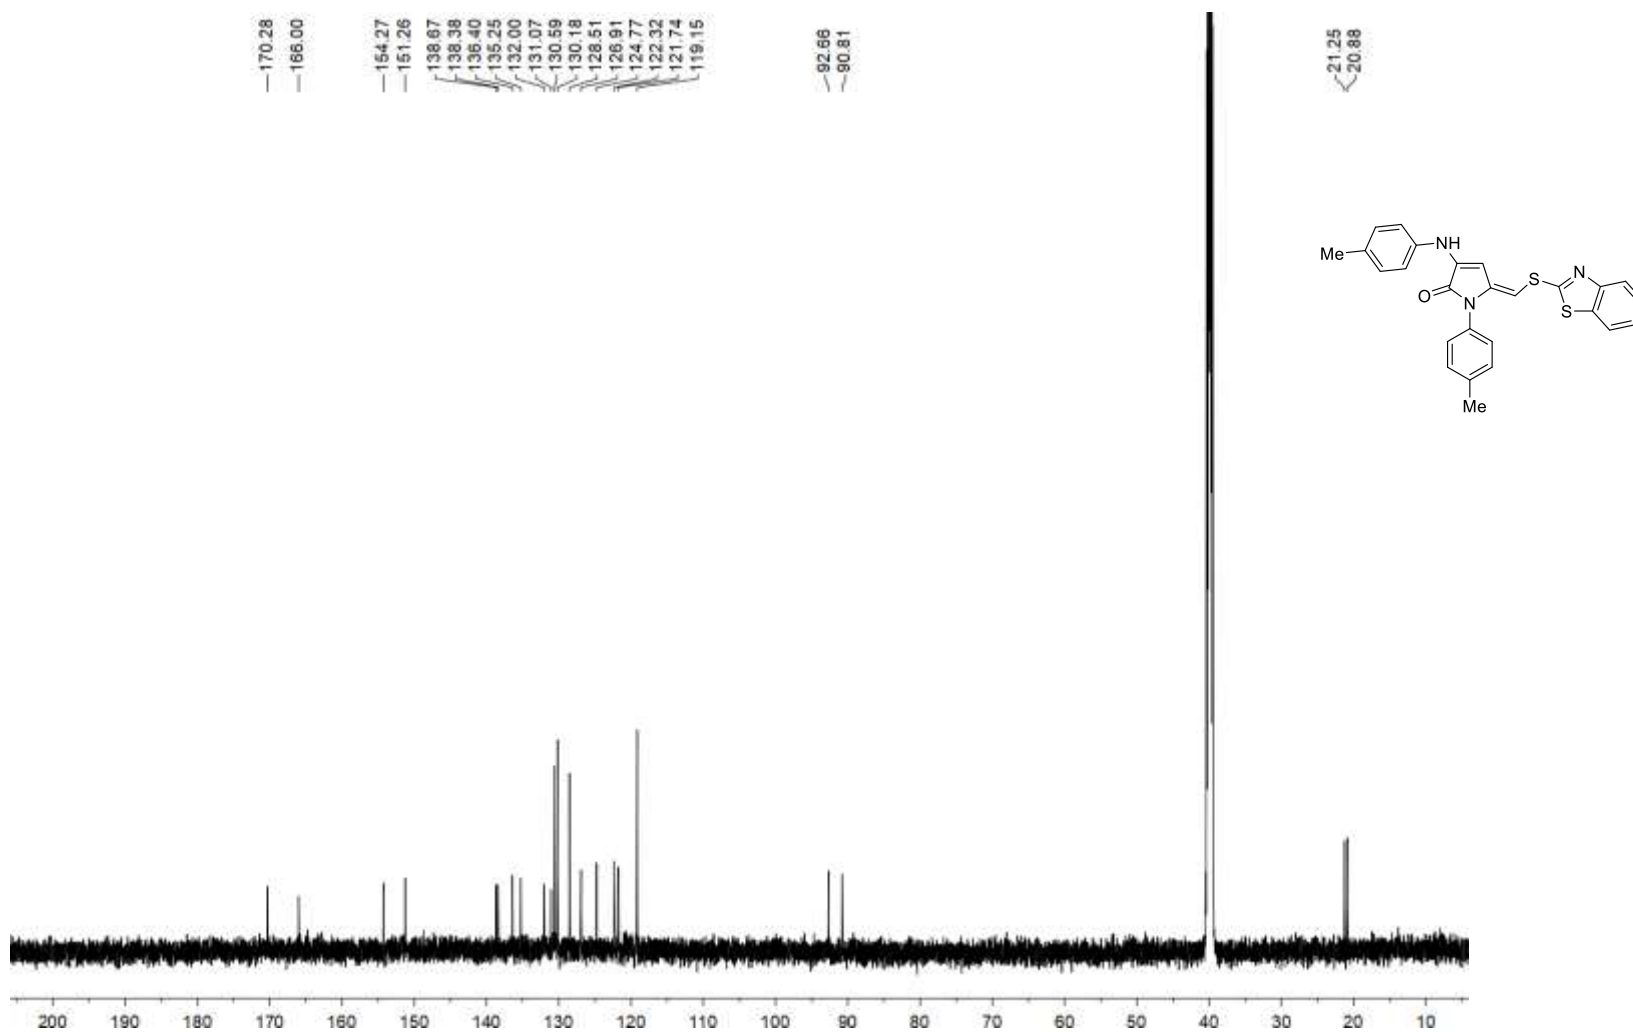

Figure S45.  $^{13}\text{C}$  NMR (150 MHz,  $\text{DMSO}-d_6$ ) spectra of compound **4u**

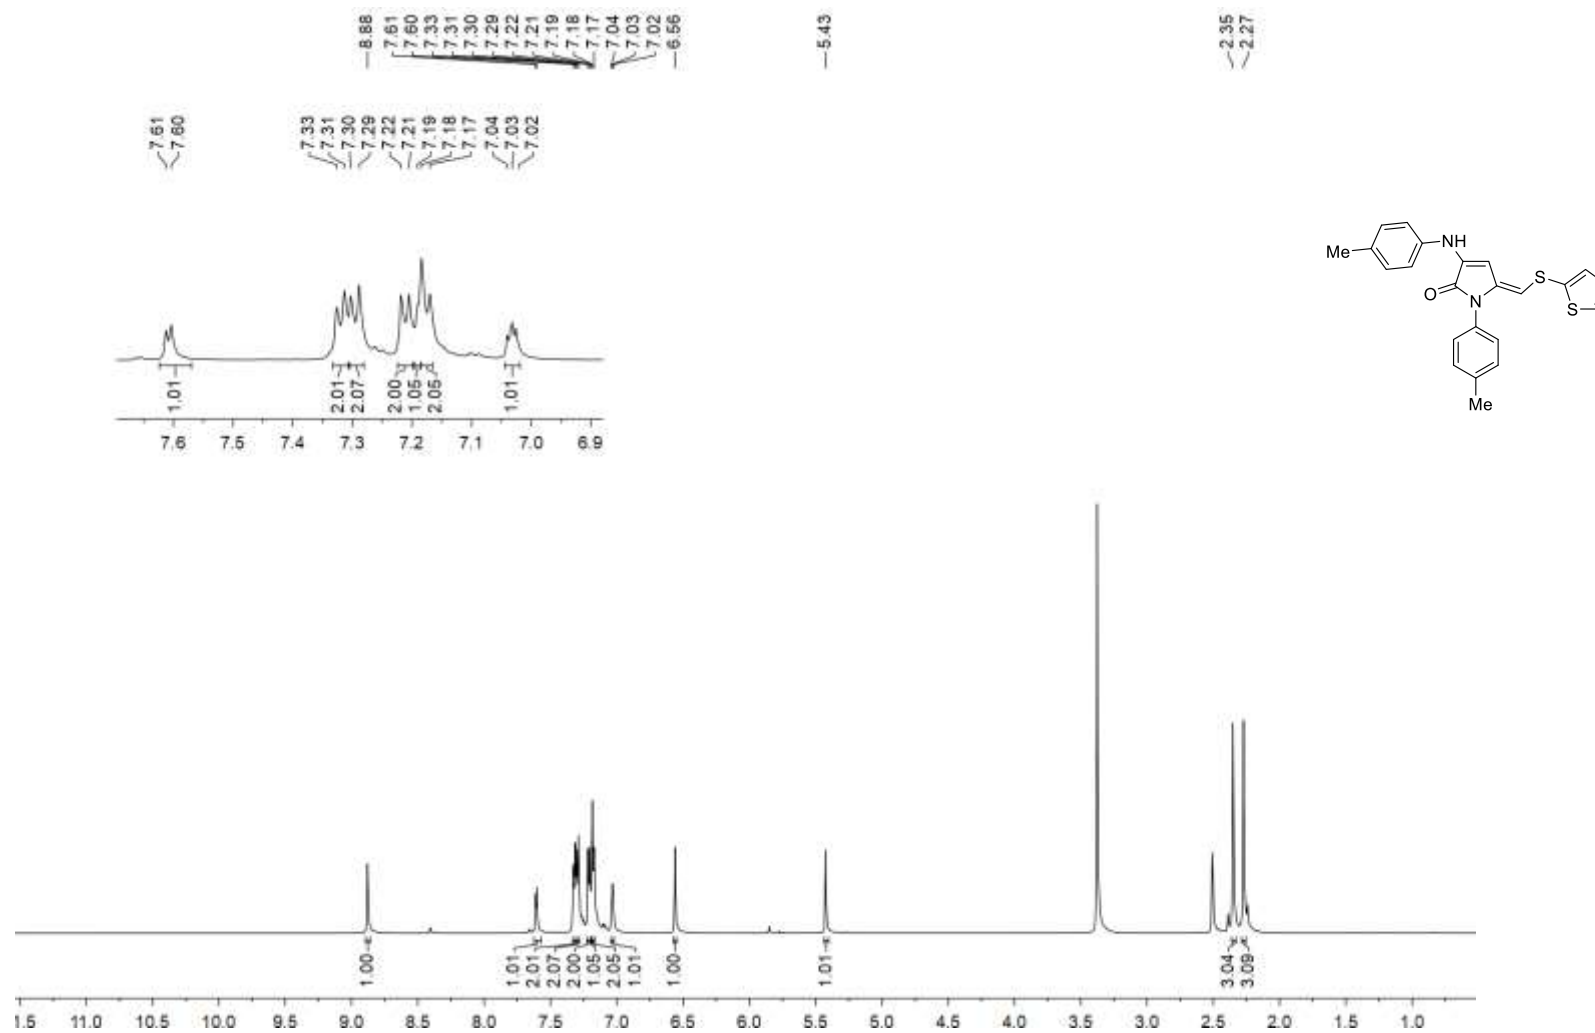

Figure S46.  $^1\text{H}$  NMR (600 MHz,  $\text{DMSO}-d_6$ ) spectra of compound **4v**

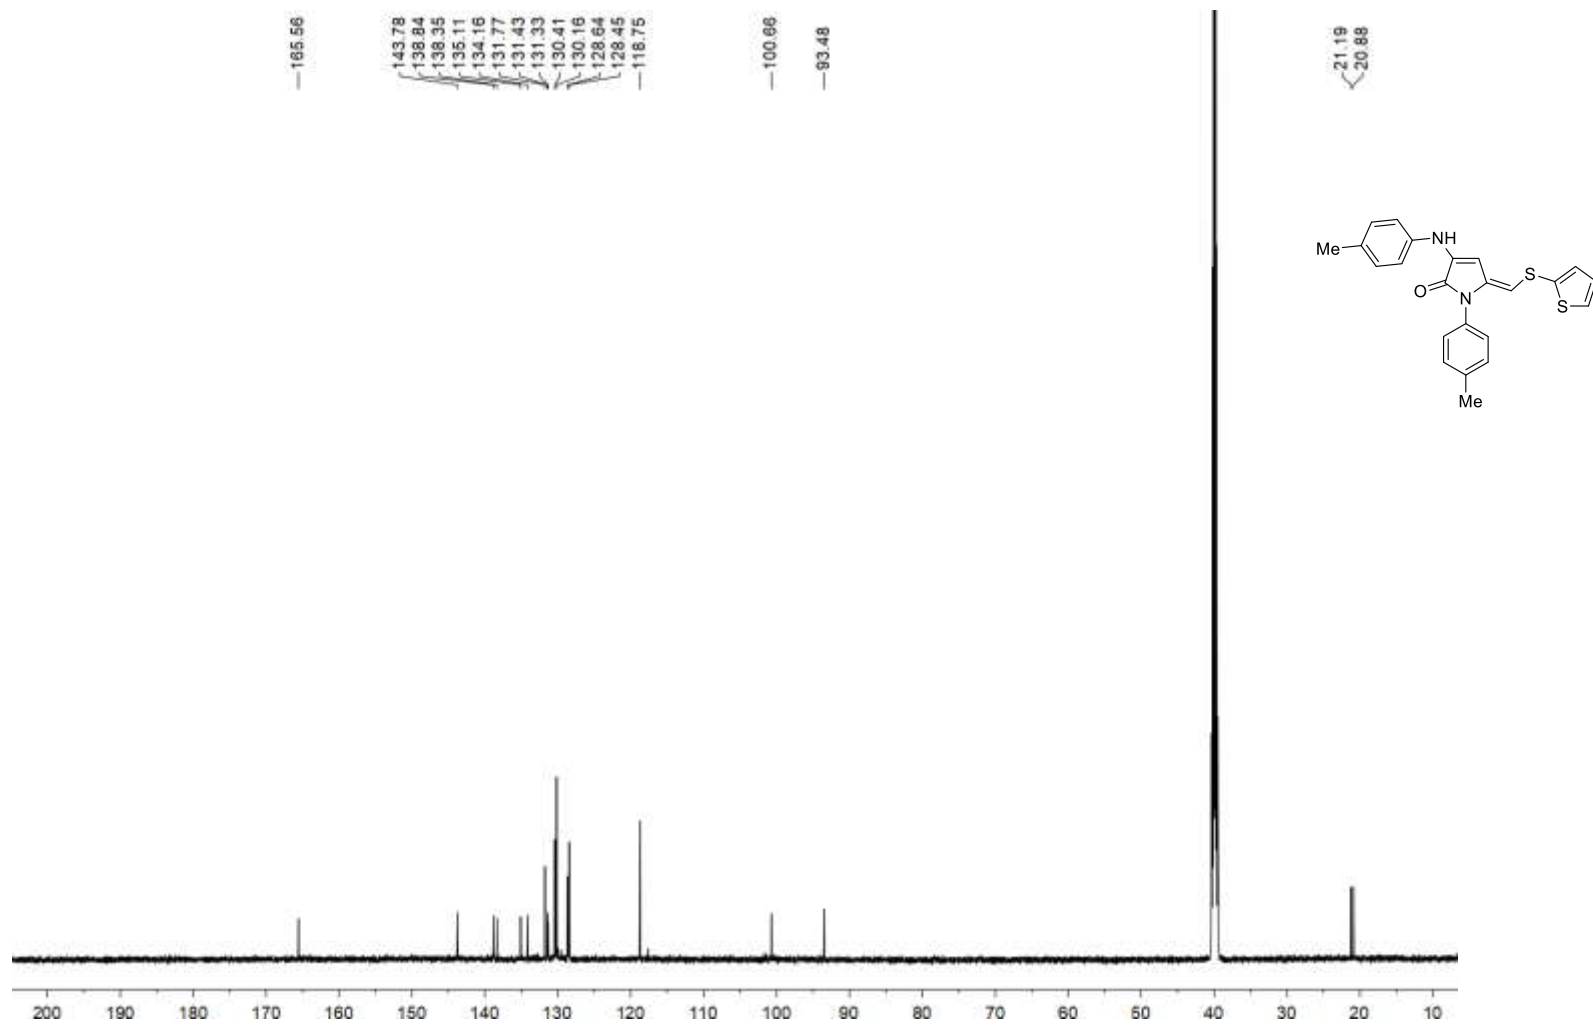

**Figure S47.**  $^{13}\text{C}$  NMR (150 MHz,  $\text{DMSO-}d_6$ ) spectra of compound **4v**

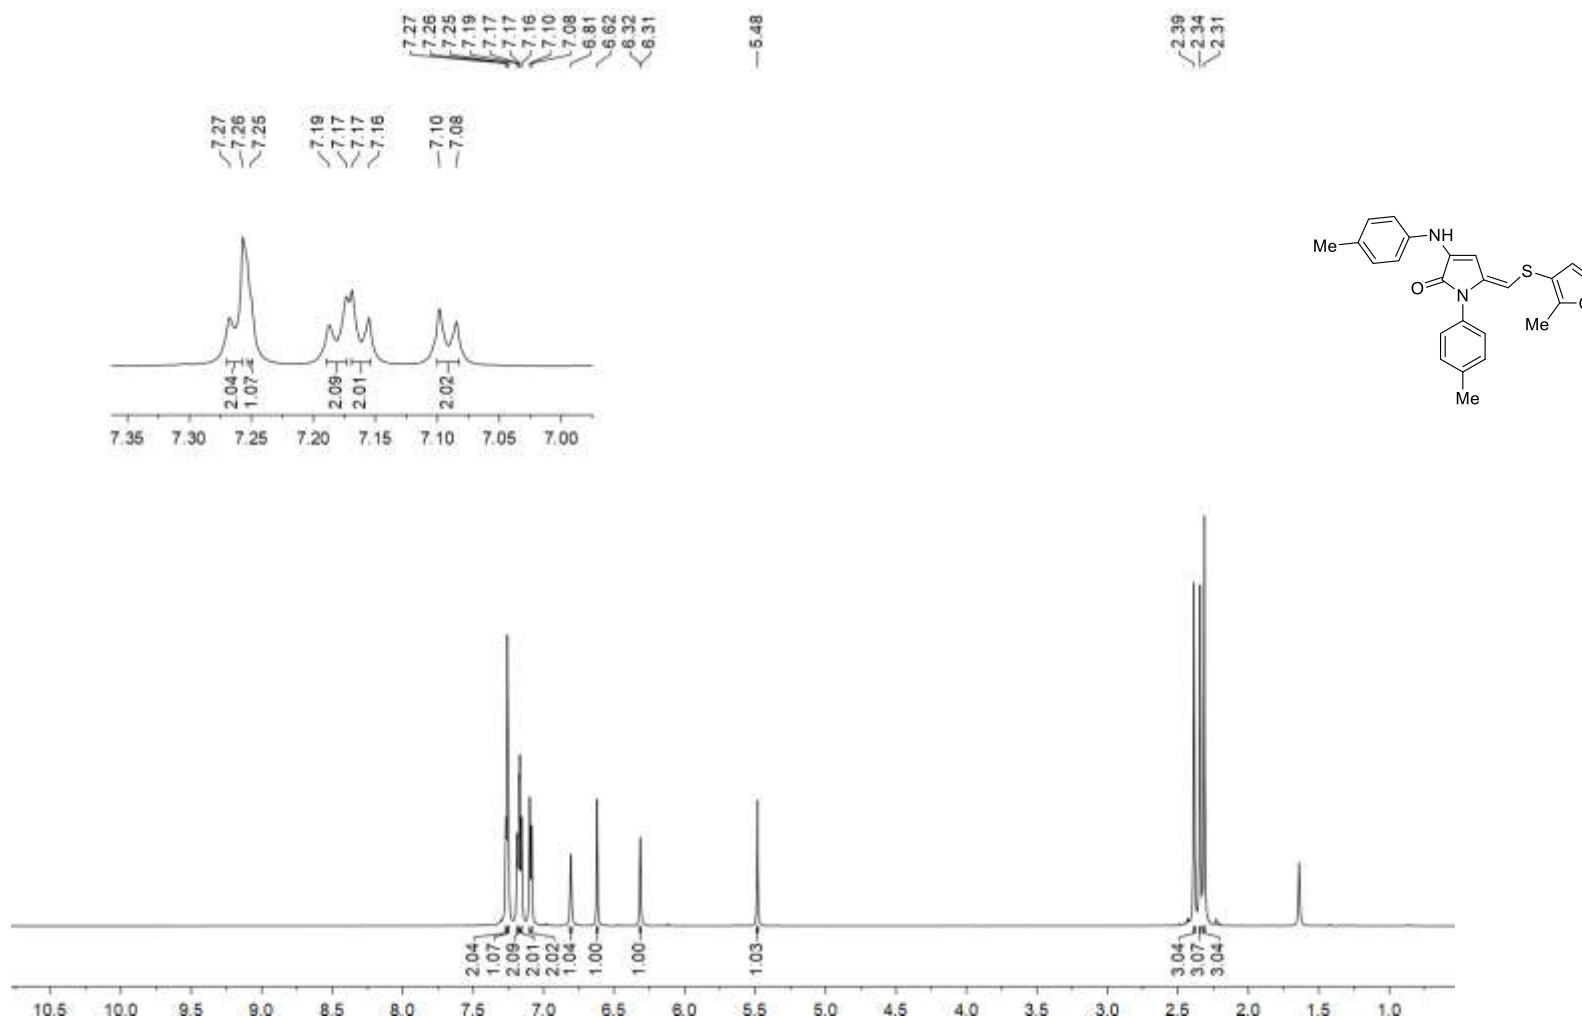



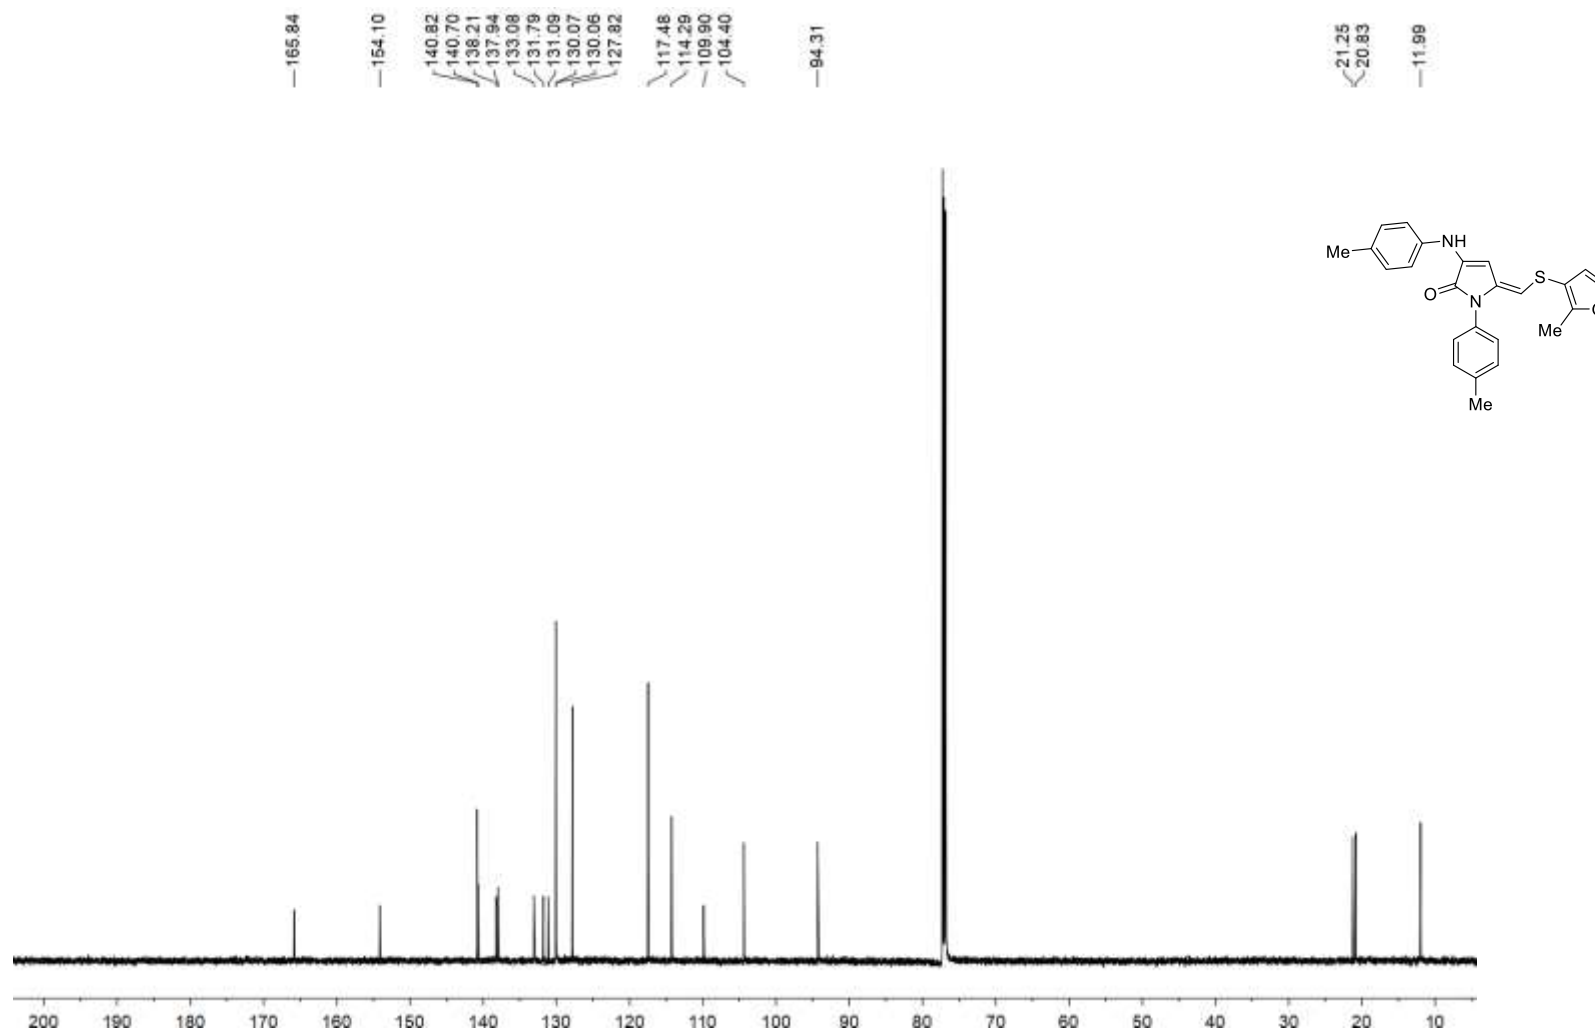

Figure S49. <sup>13</sup>C NMR (150 MHz, CDCl<sub>3</sub>) spectra of compound 4w

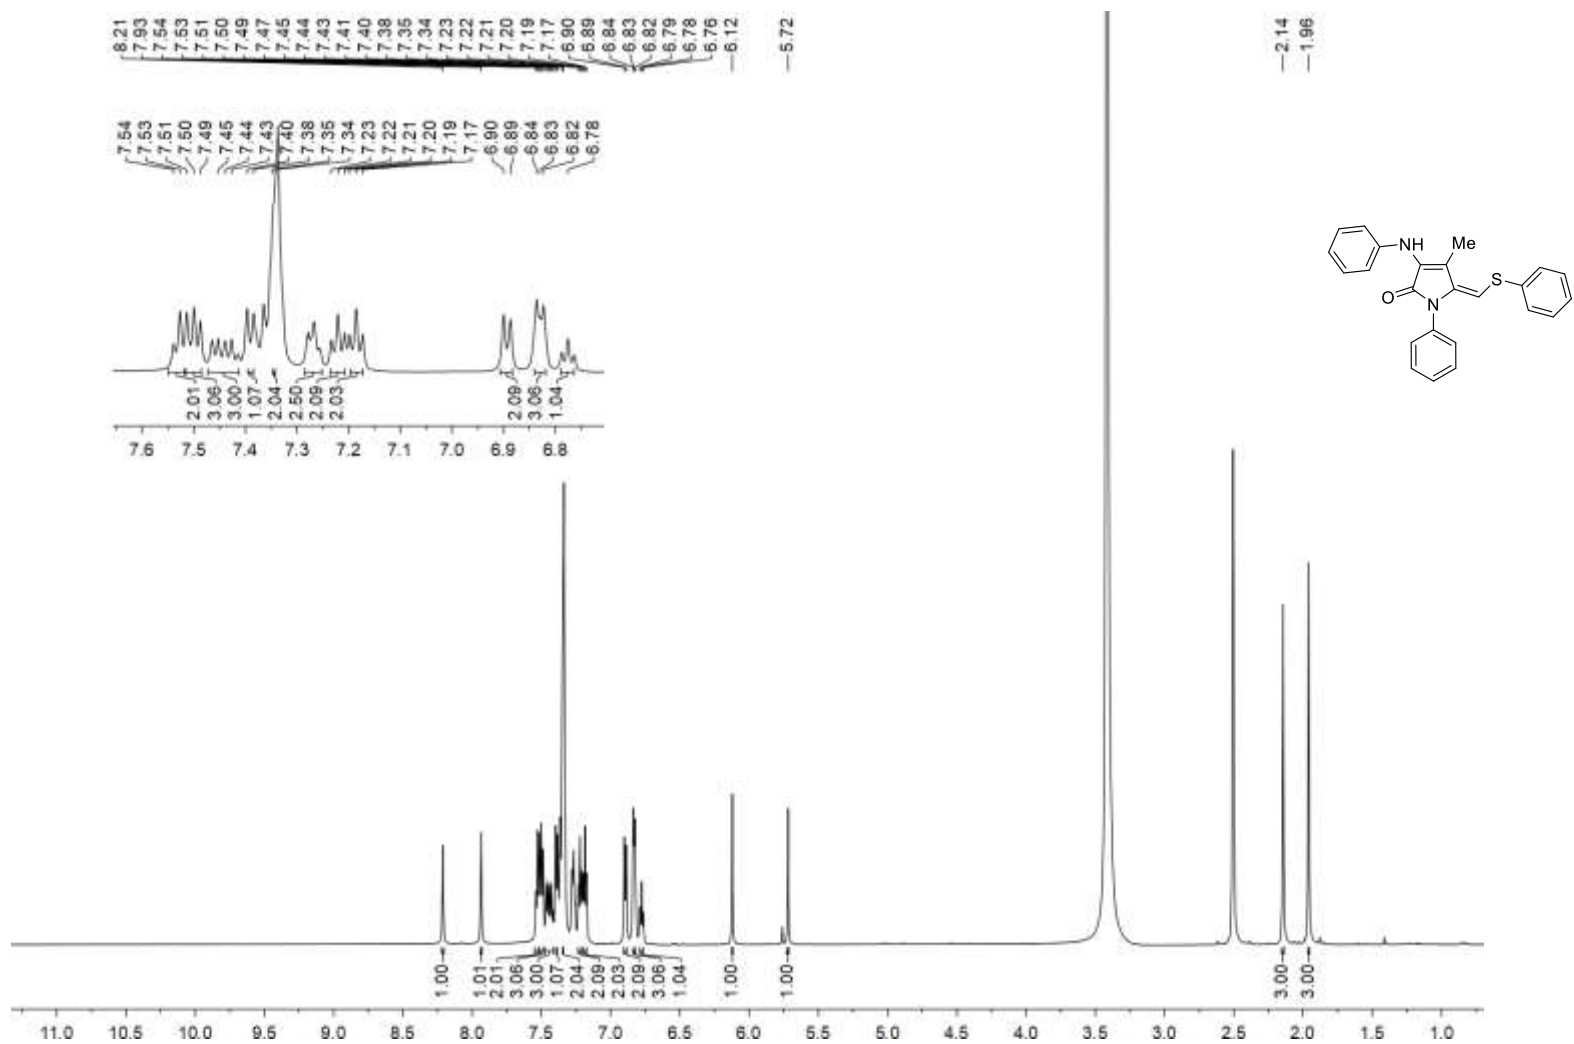

Figure S50. <sup>1</sup>H NMR (600 MHz, DMSO-*d*<sub>6</sub>) spectra of compound 4x

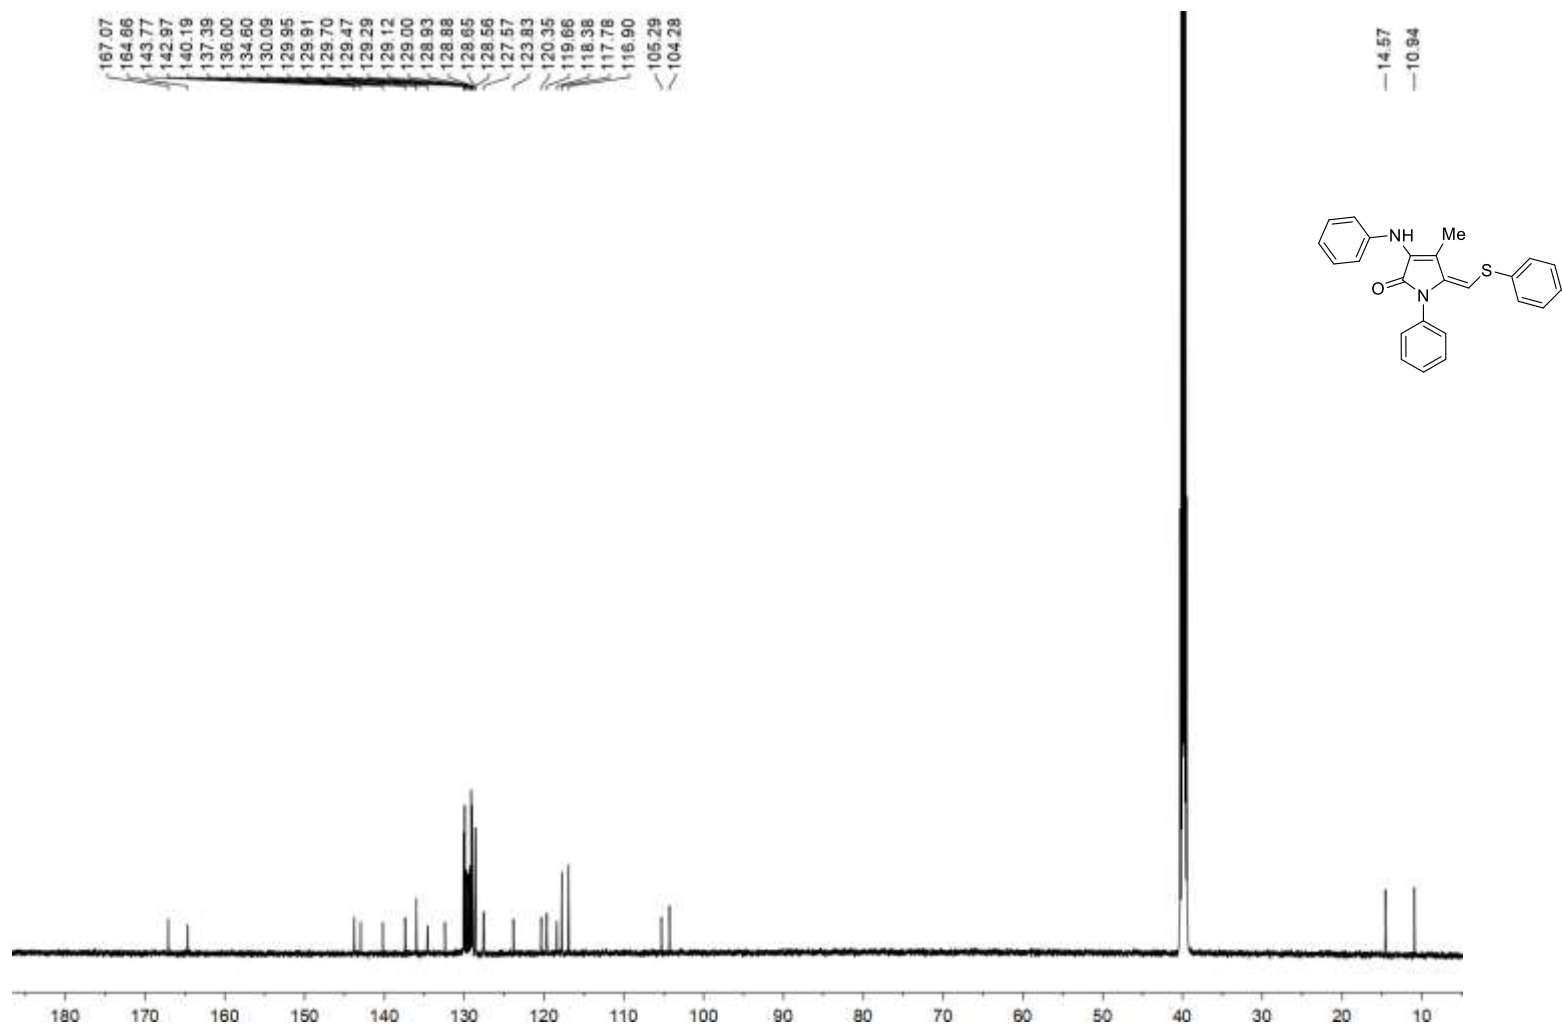

Figure S51.  $^{13}\text{C}$  NMR (150 MHz,  $\text{DMSO-}d_6$ ) spectra of compound **4x**

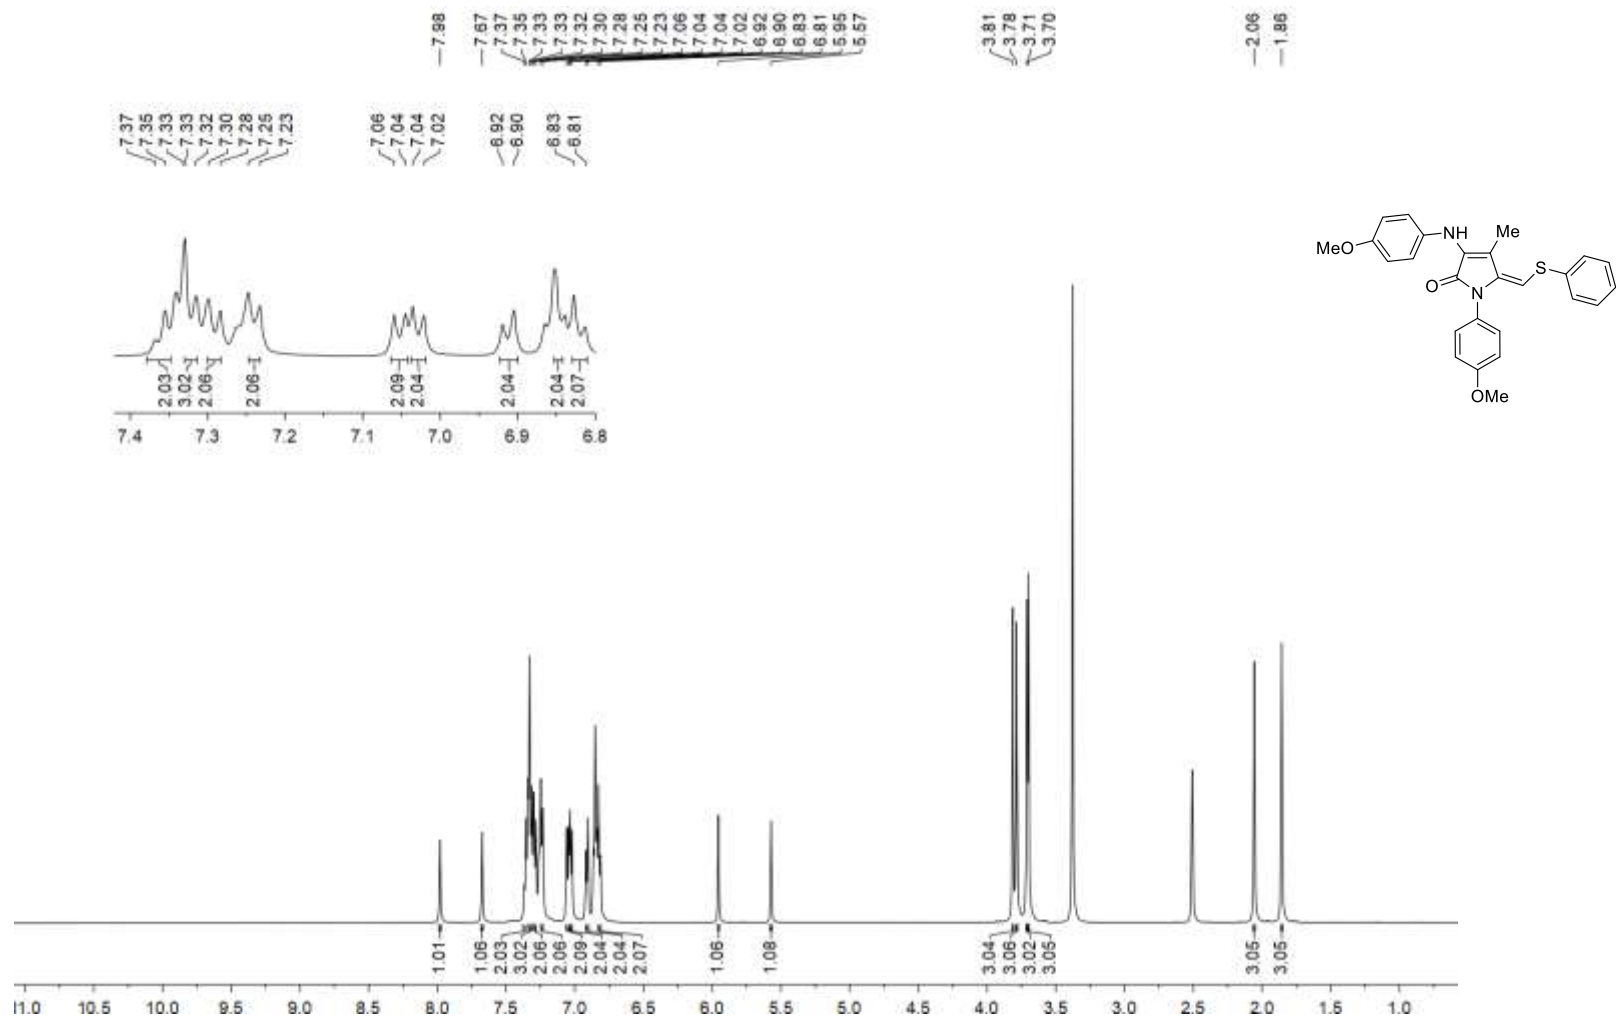

Figure S52. <sup>1</sup>H NMR (600 MHz, DMSO-*d*<sub>6</sub>) spectra of compound **4y**

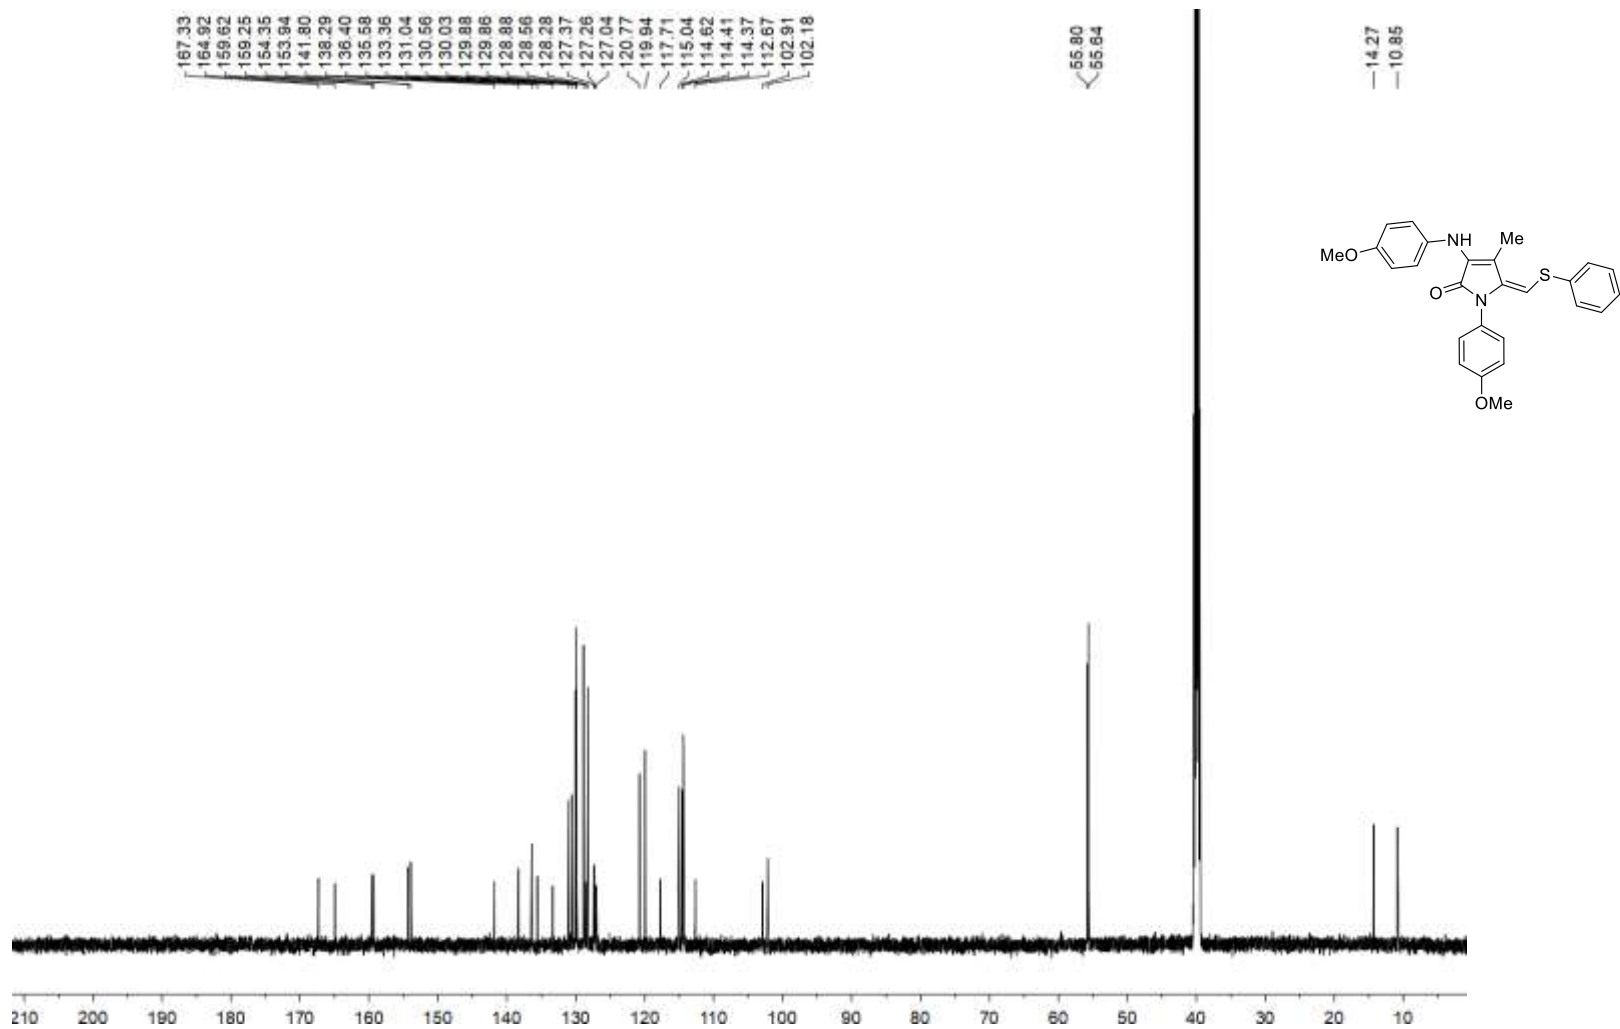

**Figure S53.** <sup>13</sup>C NMR (150 MHz, DMSO-*d*<sub>6</sub>) spectra of compound **4y**

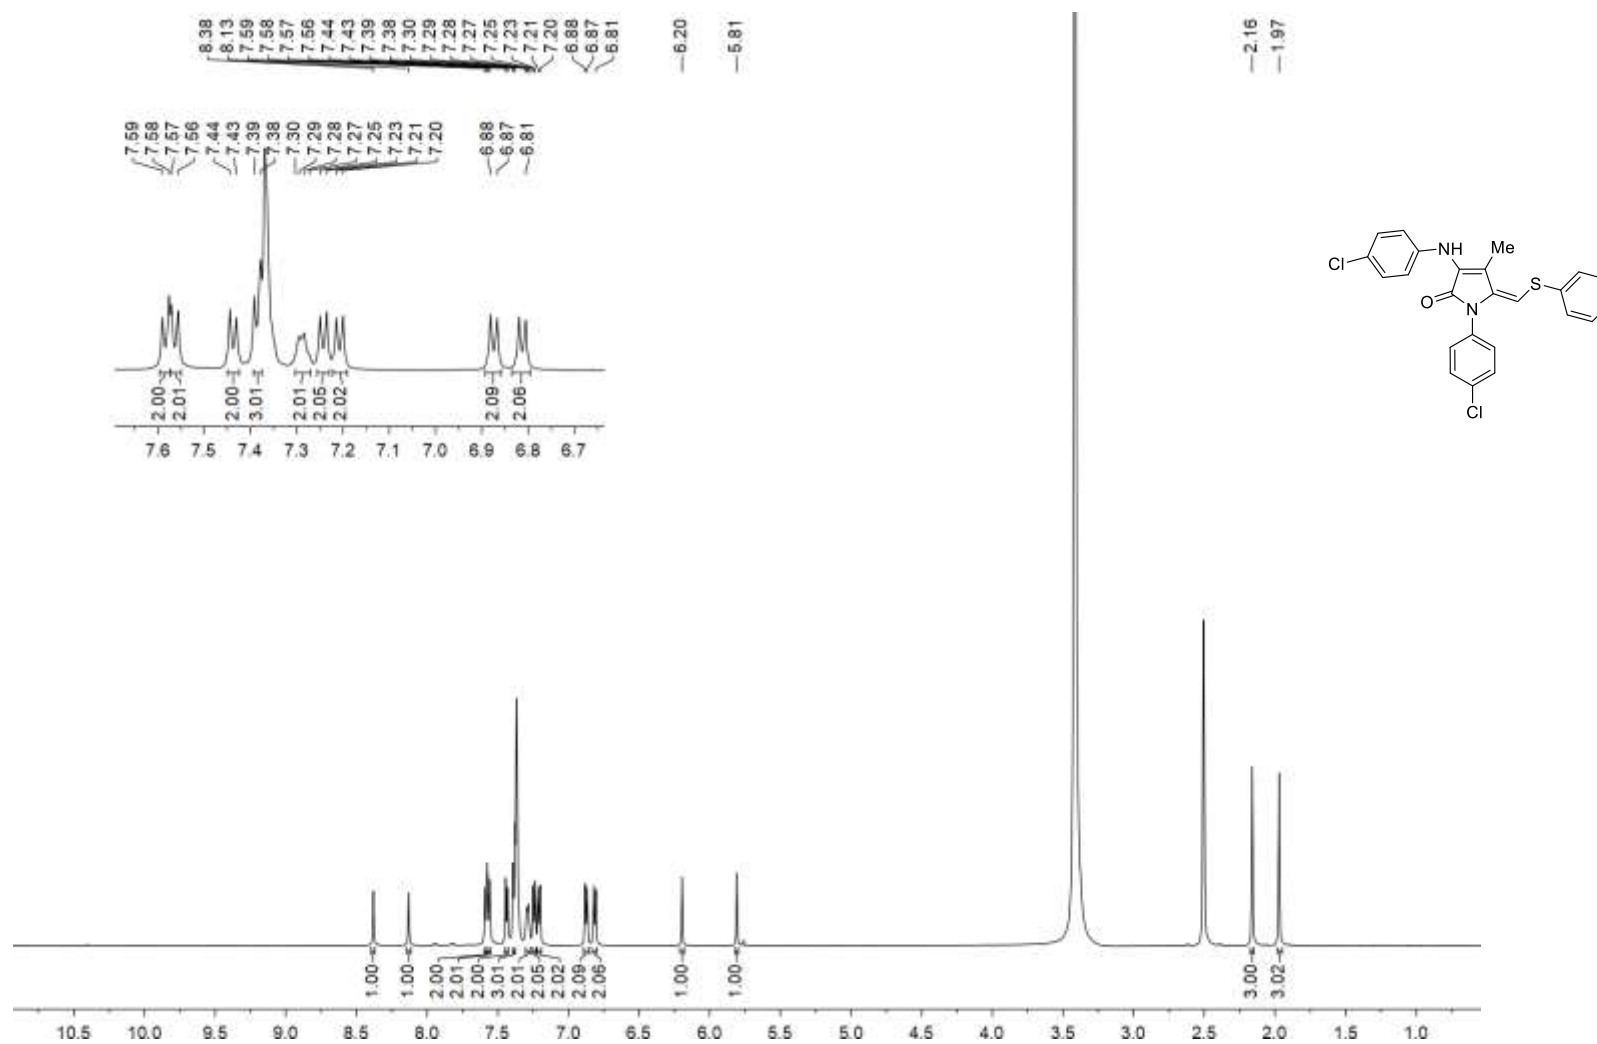

Figure S54. <sup>1</sup>H NMR (600 MHz, DMSO-*d*<sub>6</sub>) spectra of compound **4z**

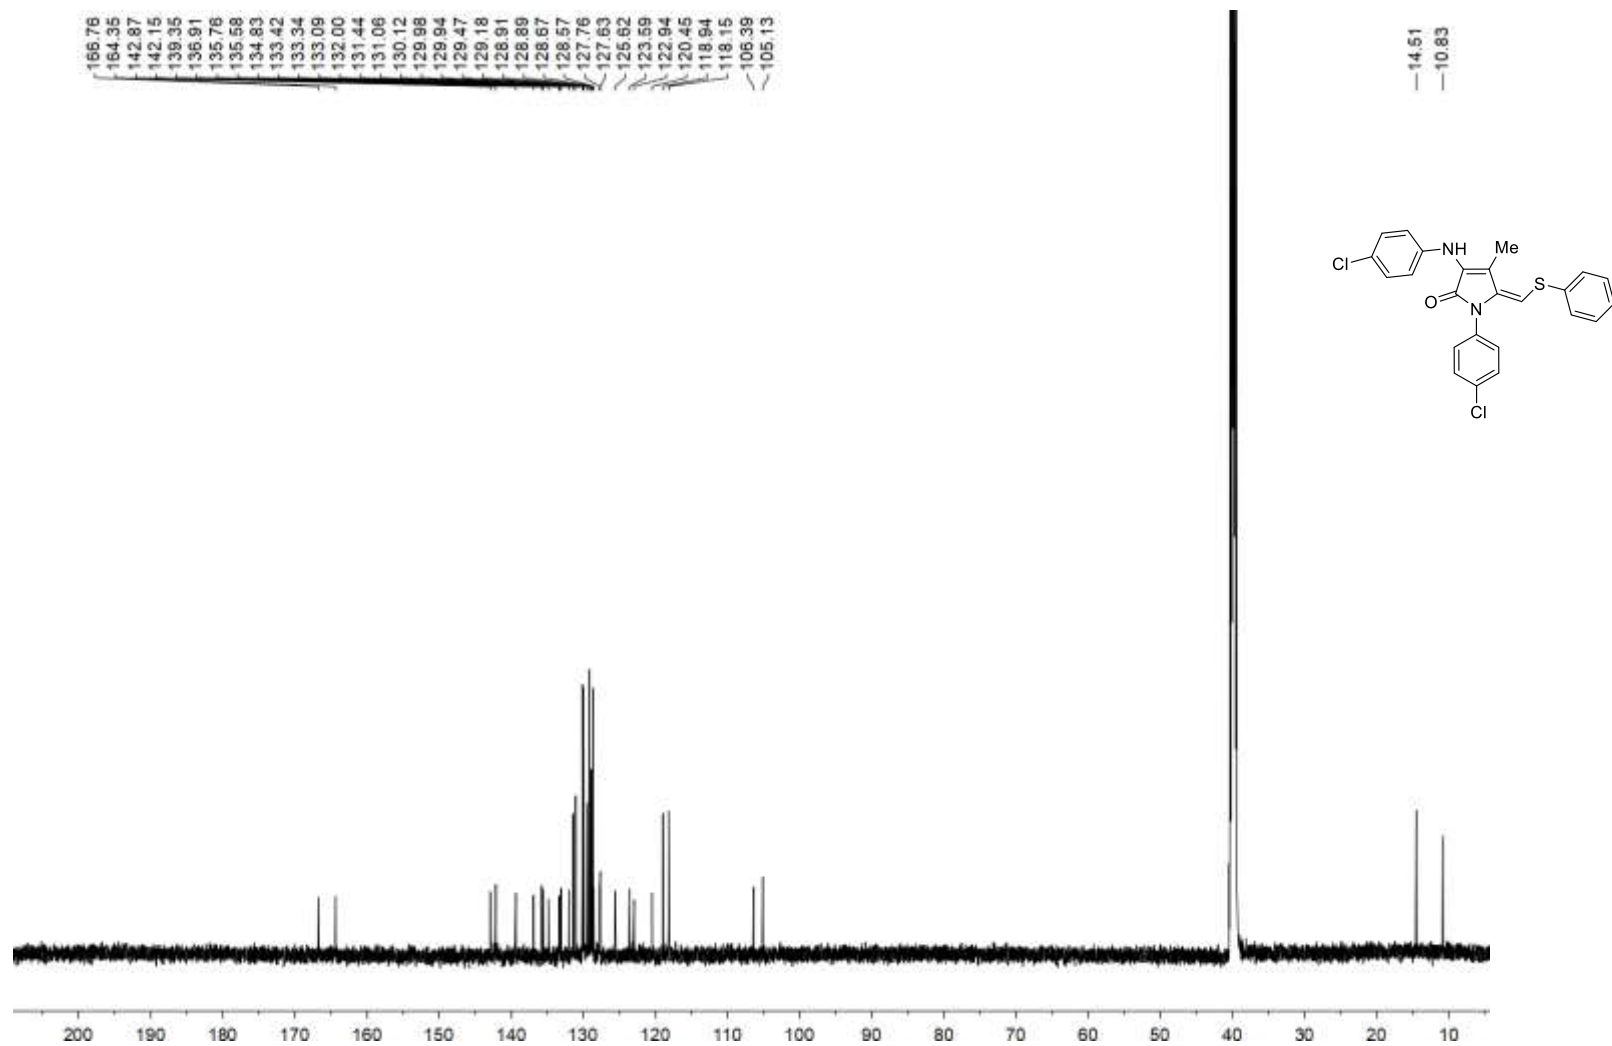

Figure S55. <sup>13</sup>C NMR (150 MHz, DMSO-*d*<sub>6</sub>) spectra of compound **4z**

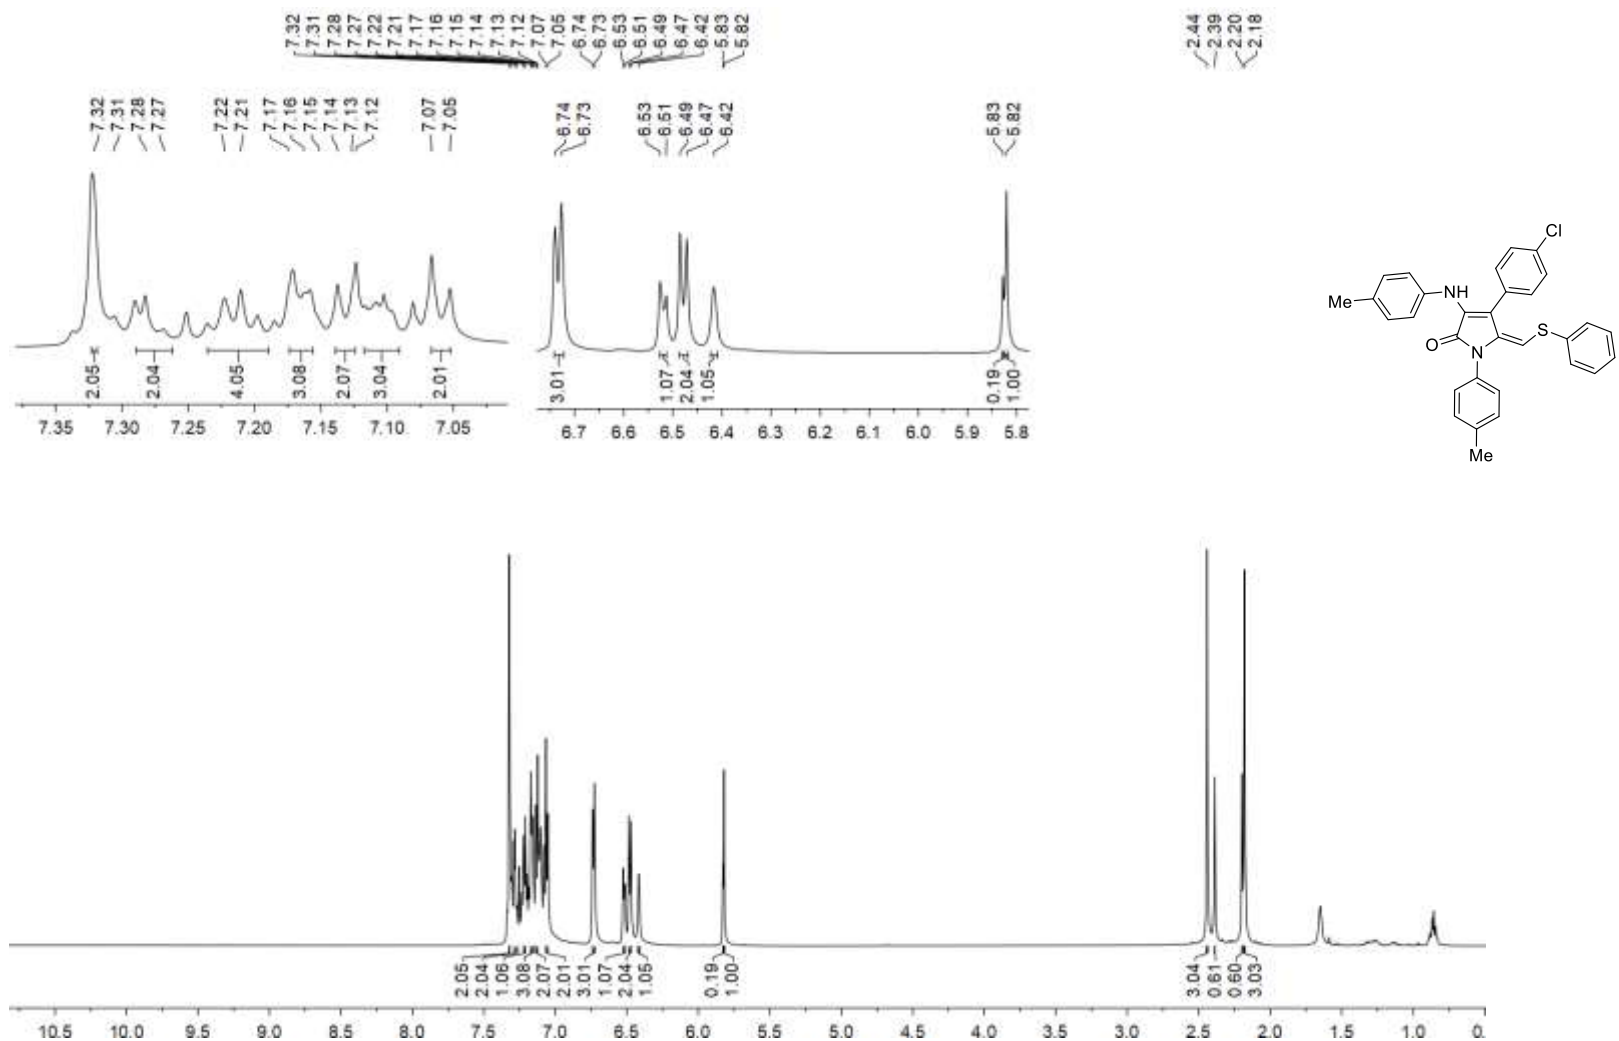

Figure S56. <sup>1</sup>H NMR (600 MHz, CDCl<sub>3</sub>) spectra of compound **4a'**



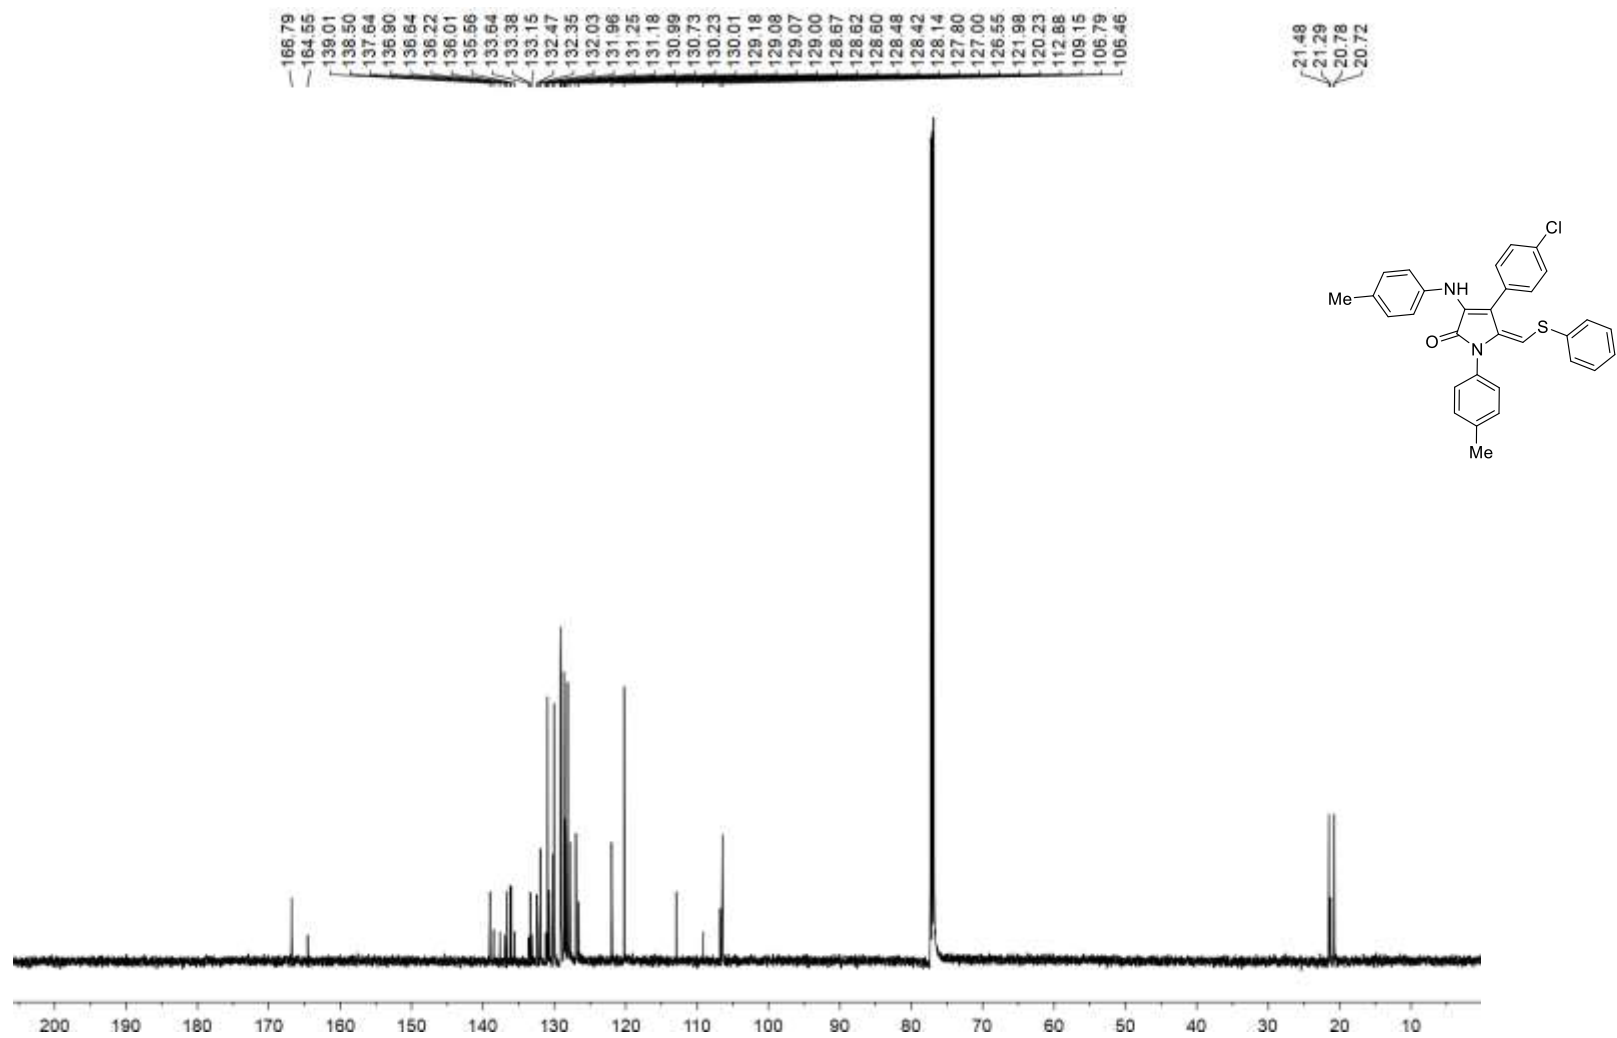

Figure S57. <sup>13</sup>C NMR (150 MHz, CDCl<sub>3</sub>) spectra of compound 4a'

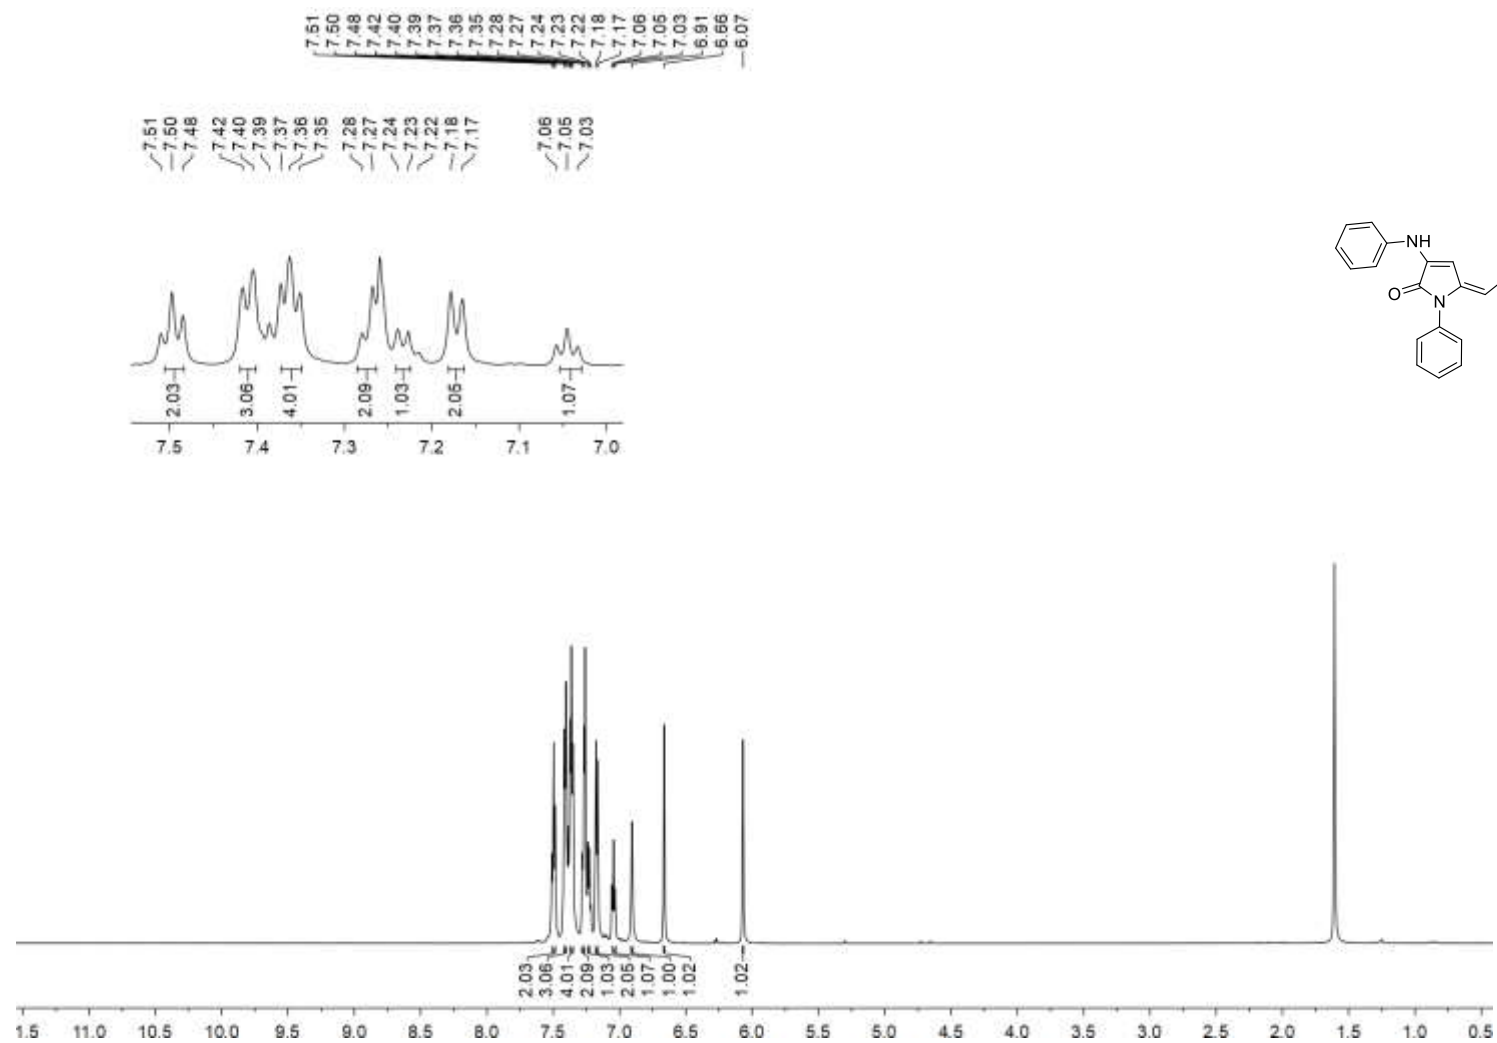

**Figure S58.**  $^1\text{H}$  NMR (600 MHz,  $\text{CDCl}_3$ ) spectra of compound **6a**

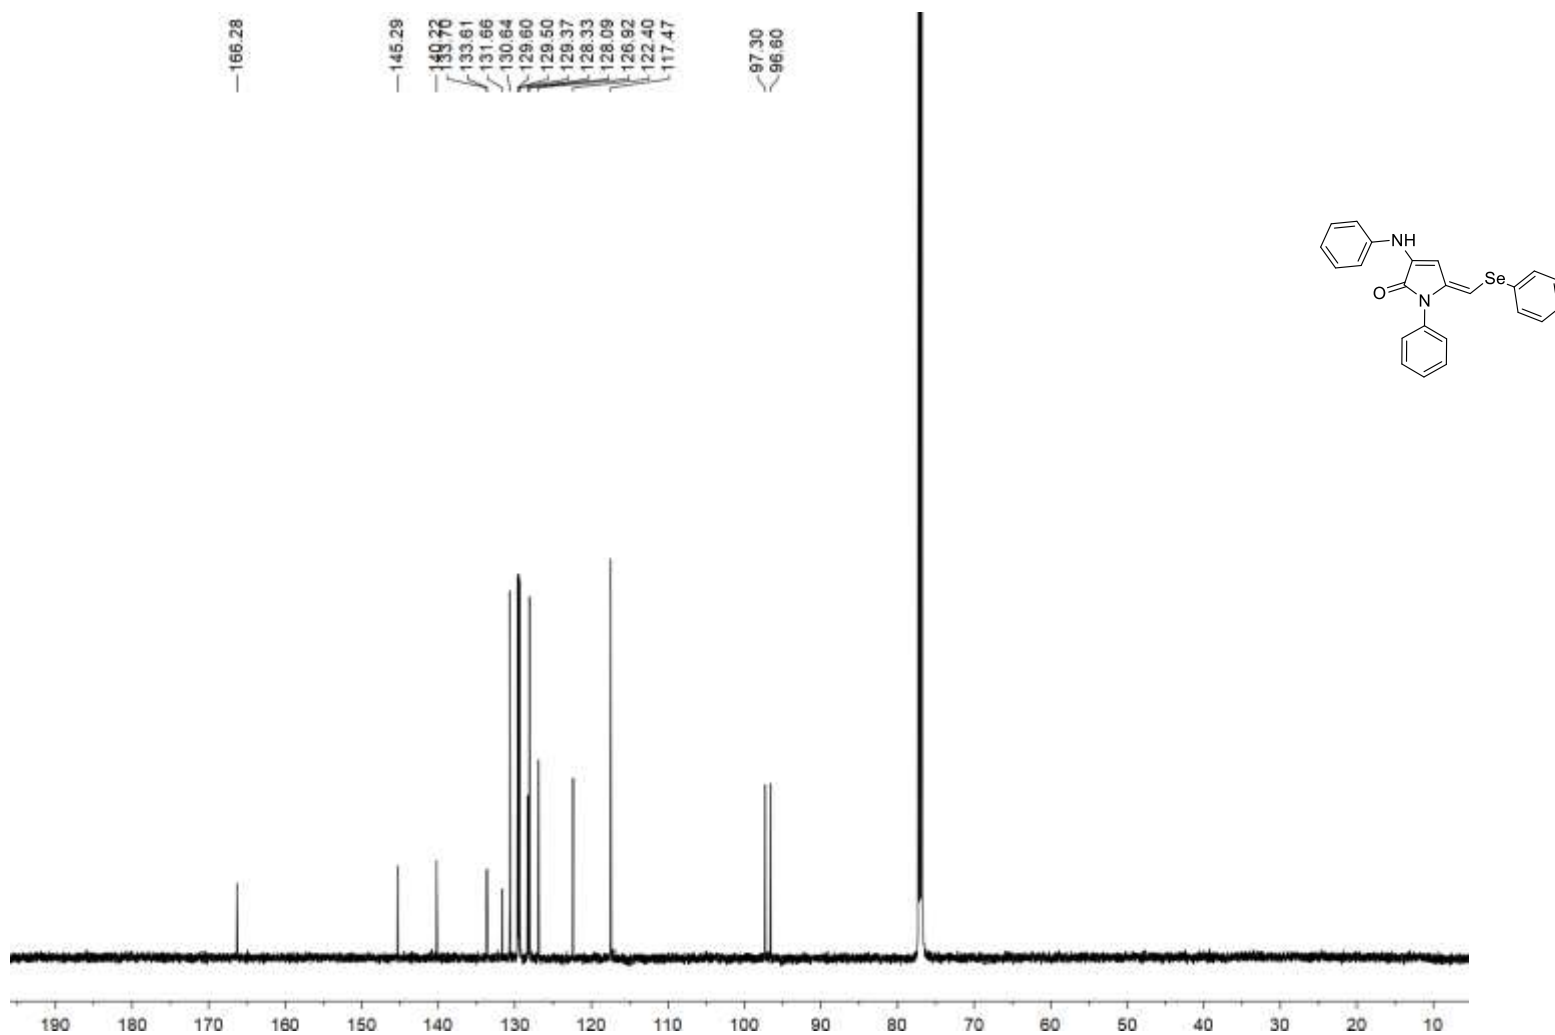

Figure S59. <sup>13</sup>C NMR (150 MHz, CDCl<sub>3</sub>) spectra of compound 6a

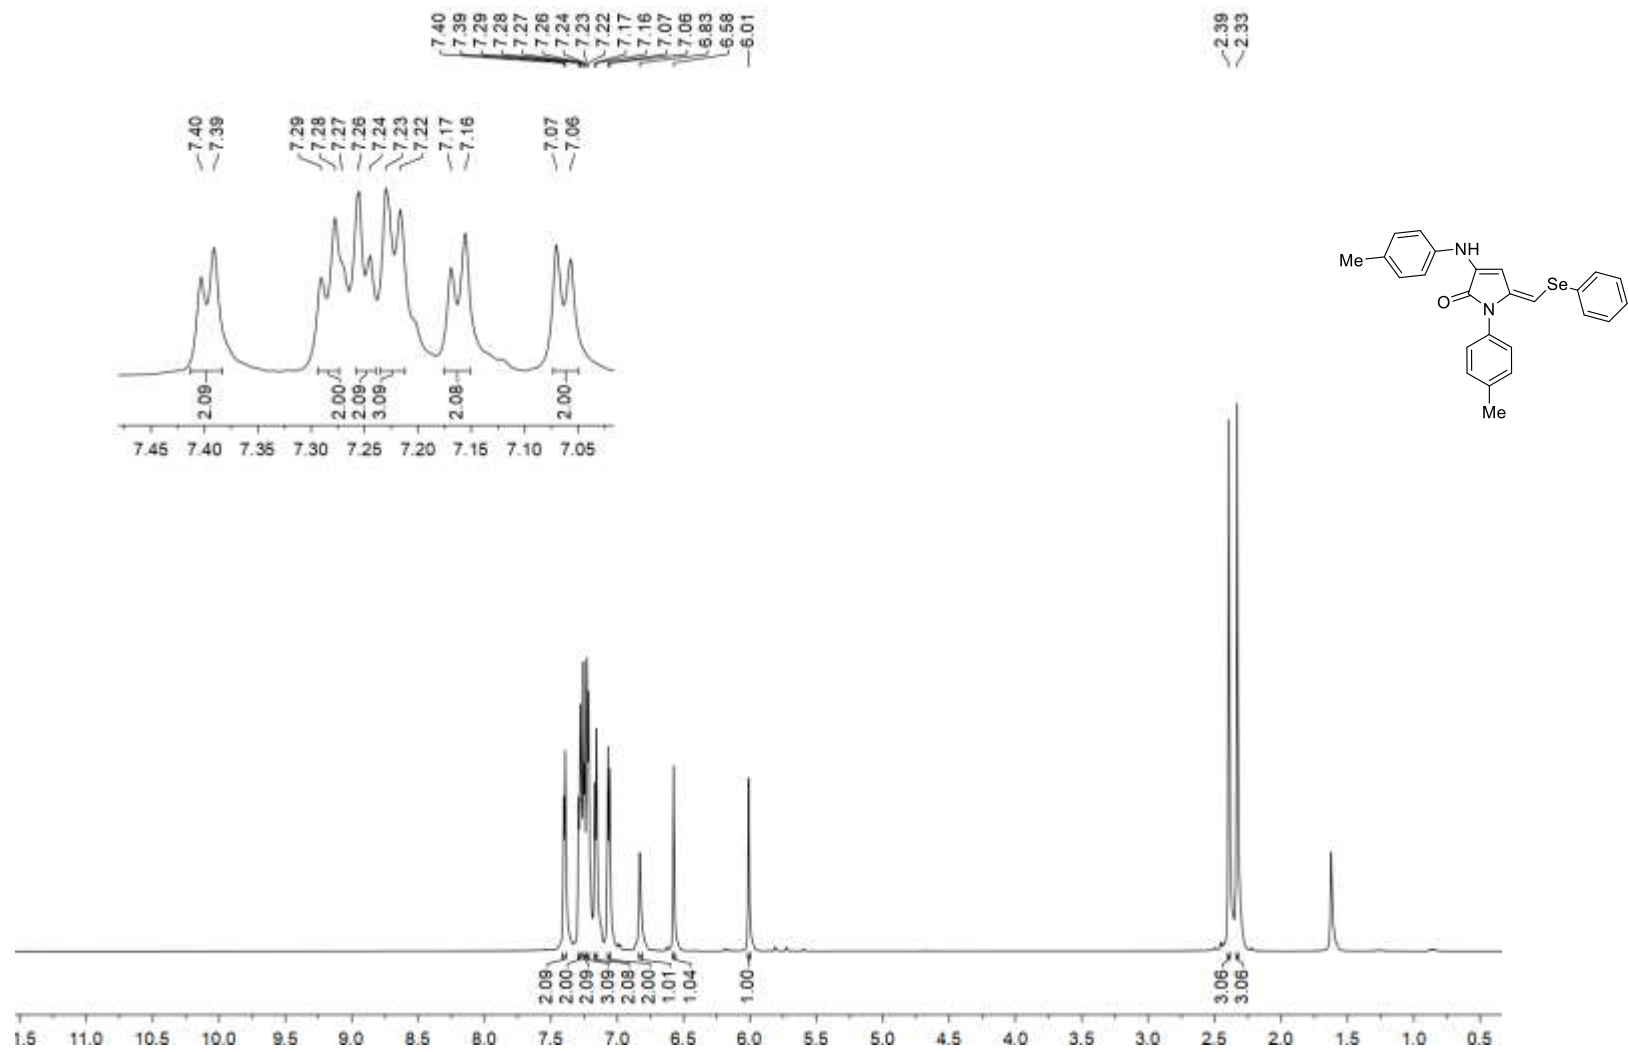

Figure S60.  $^1\text{H}$  NMR (600 MHz,  $\text{CDCl}_3$ ) spectra of compound **6b**

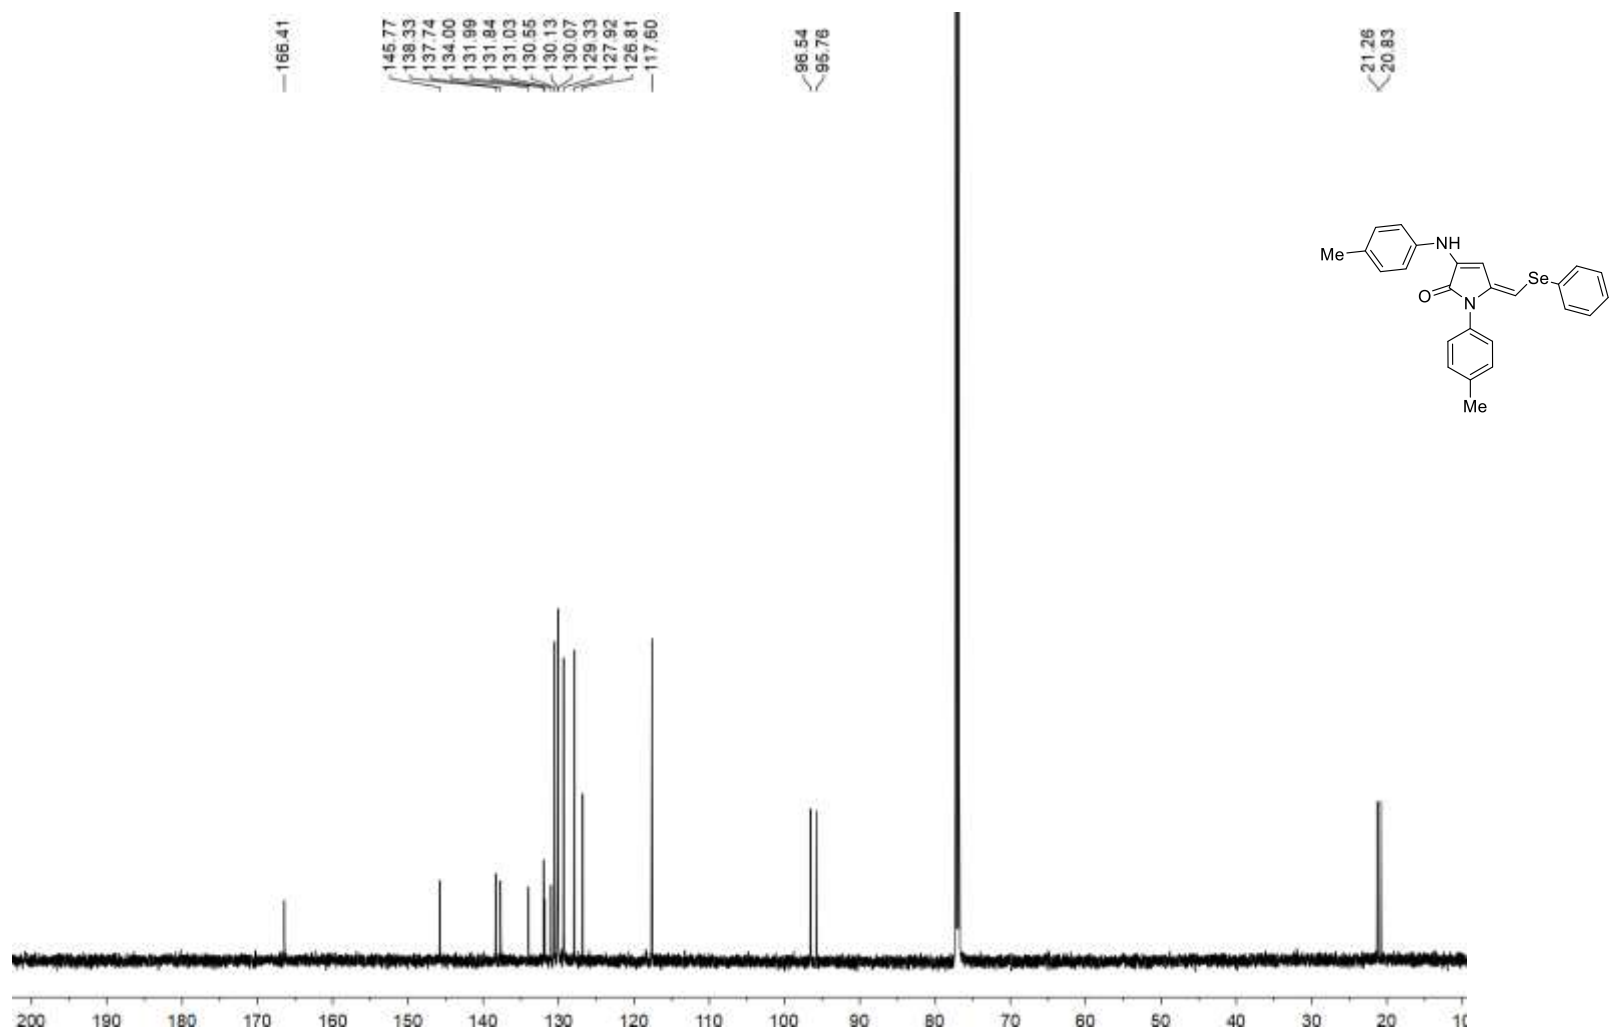

Figure S61. <sup>13</sup>C NMR (150 MHz, CDCl<sub>3</sub>) spectra of compound **6b**

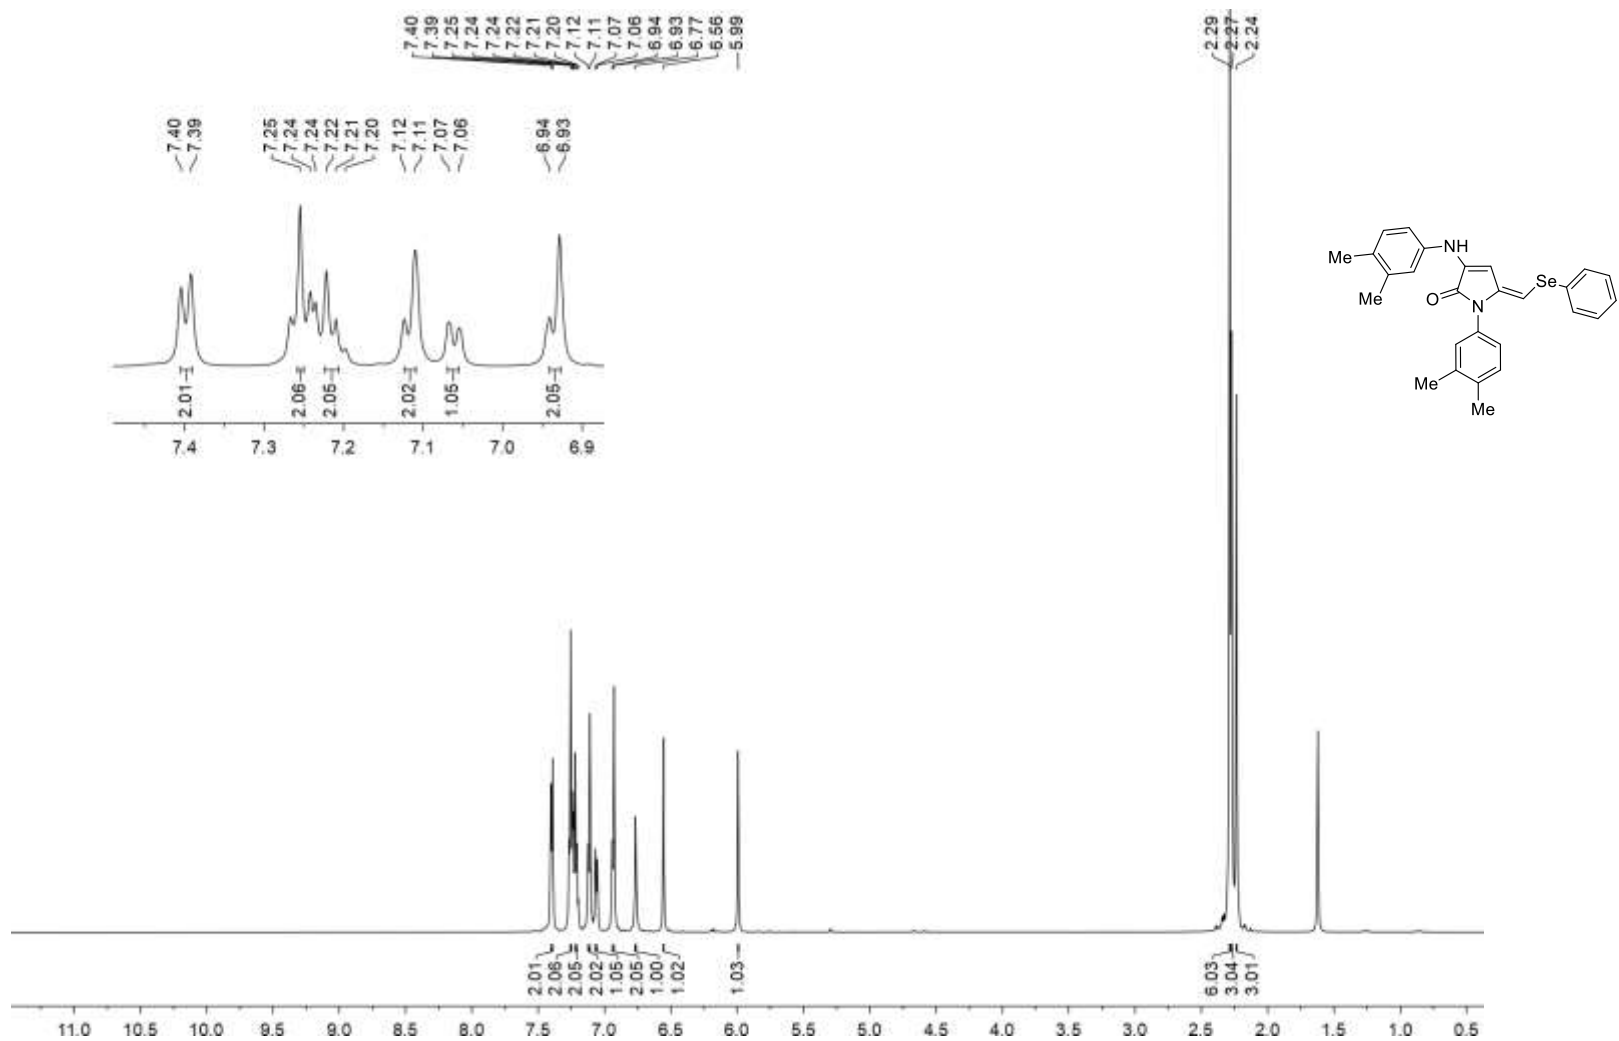

Figure S62. <sup>1</sup>H NMR (600 MHz, CDCl<sub>3</sub>) spectra of compound **6c**

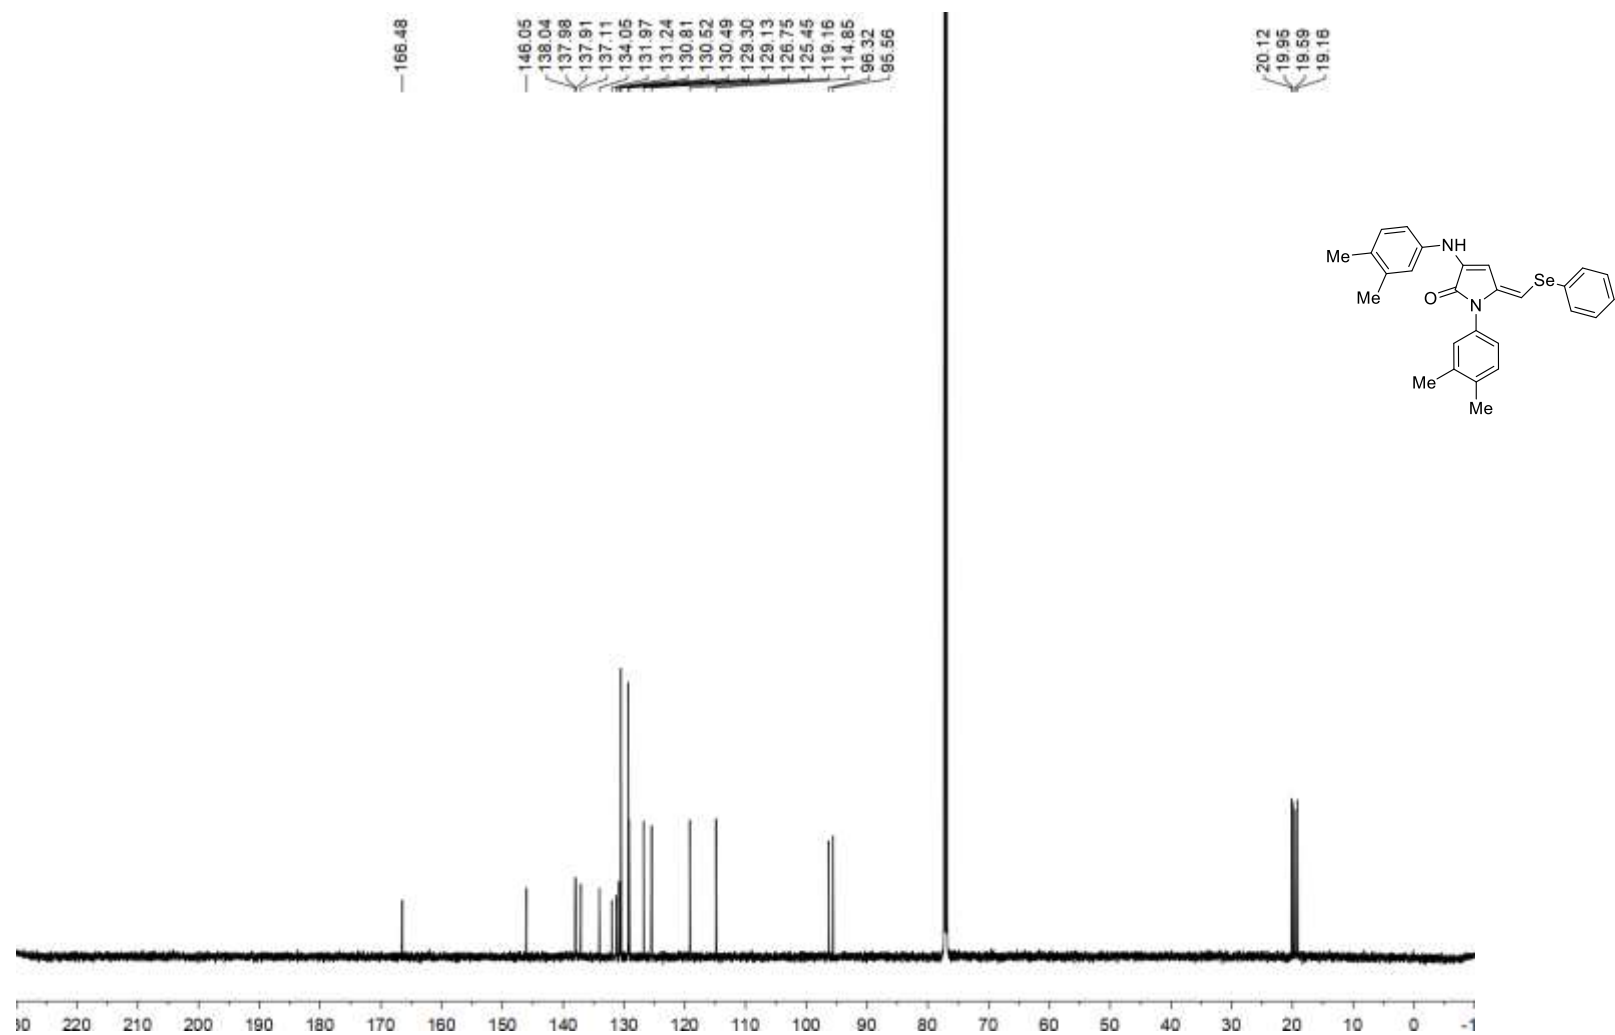

Figure S63. <sup>13</sup>C NMR (150 MHz, CDCl<sub>3</sub>) spectra of compound 6c

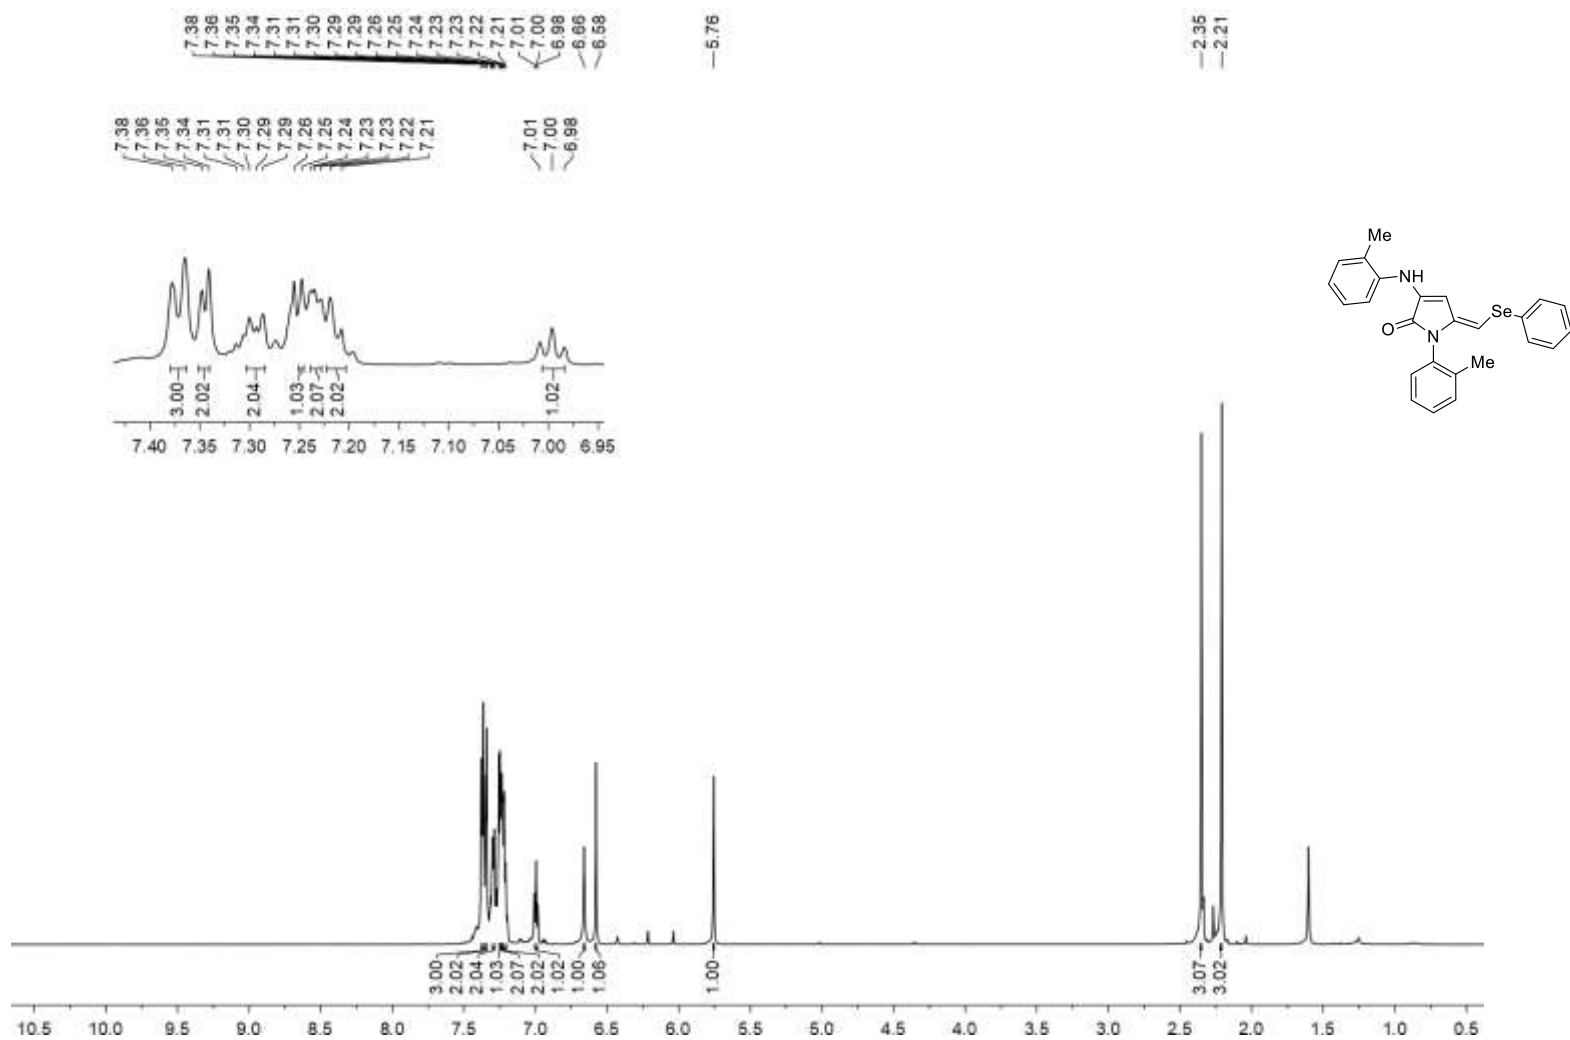

Figure S64.  $^1\text{H}$  NMR (600 MHz,  $\text{CDCl}_3$ ) spectra of compound **6d**



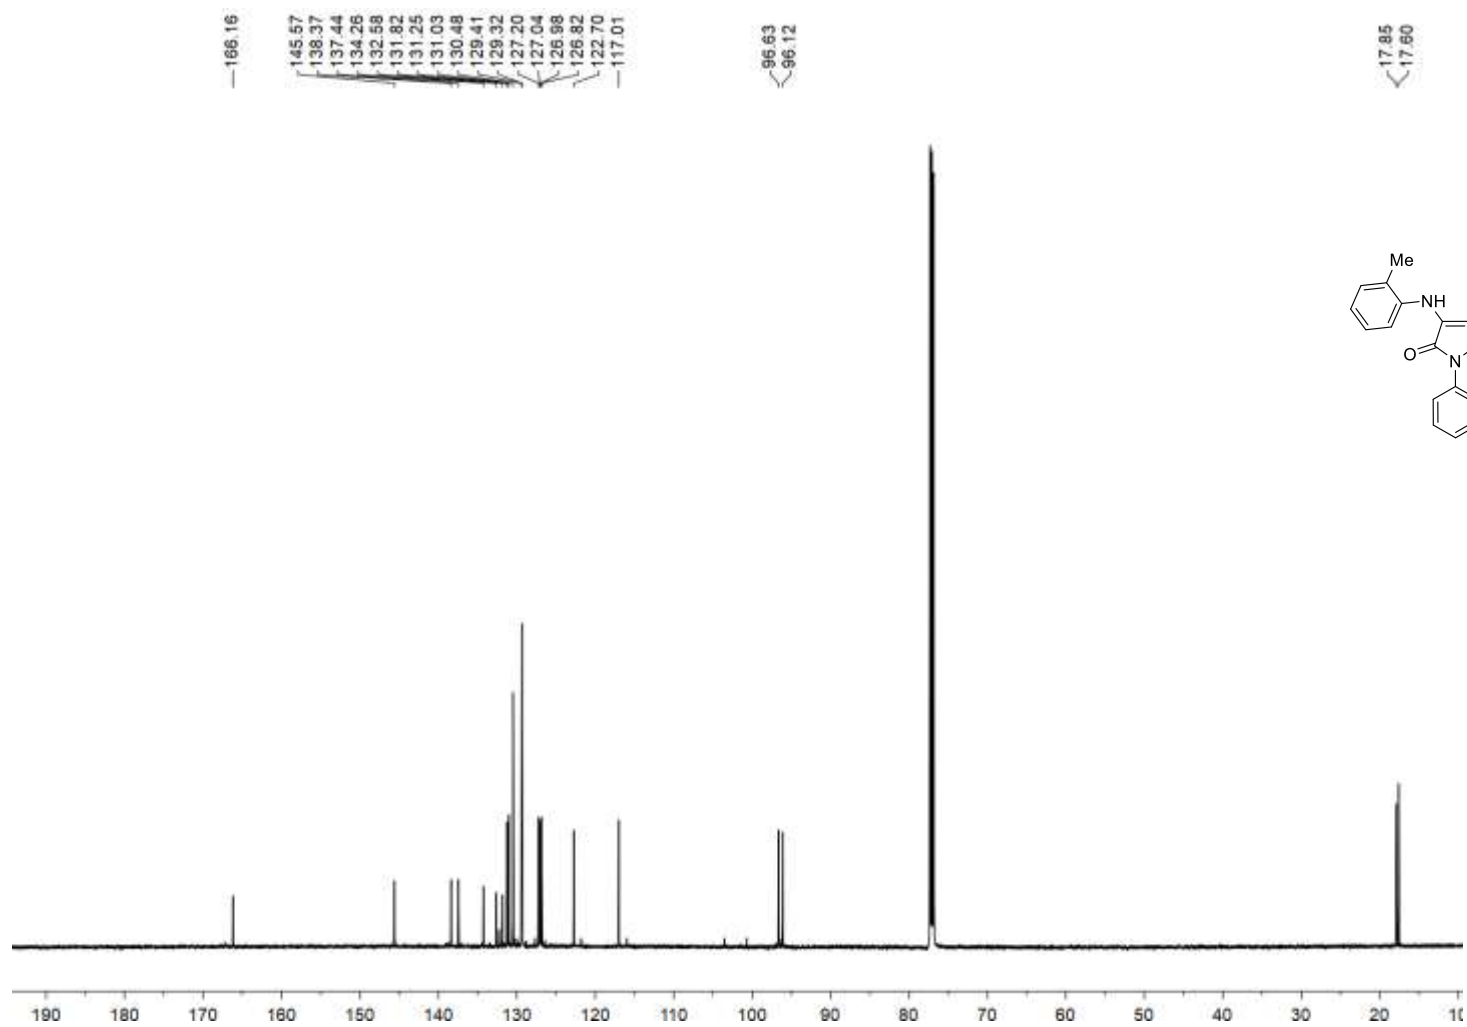

Figure S65. <sup>13</sup>C NMR (150 MHz, CDCl<sub>3</sub>) spectra of compound **6d**

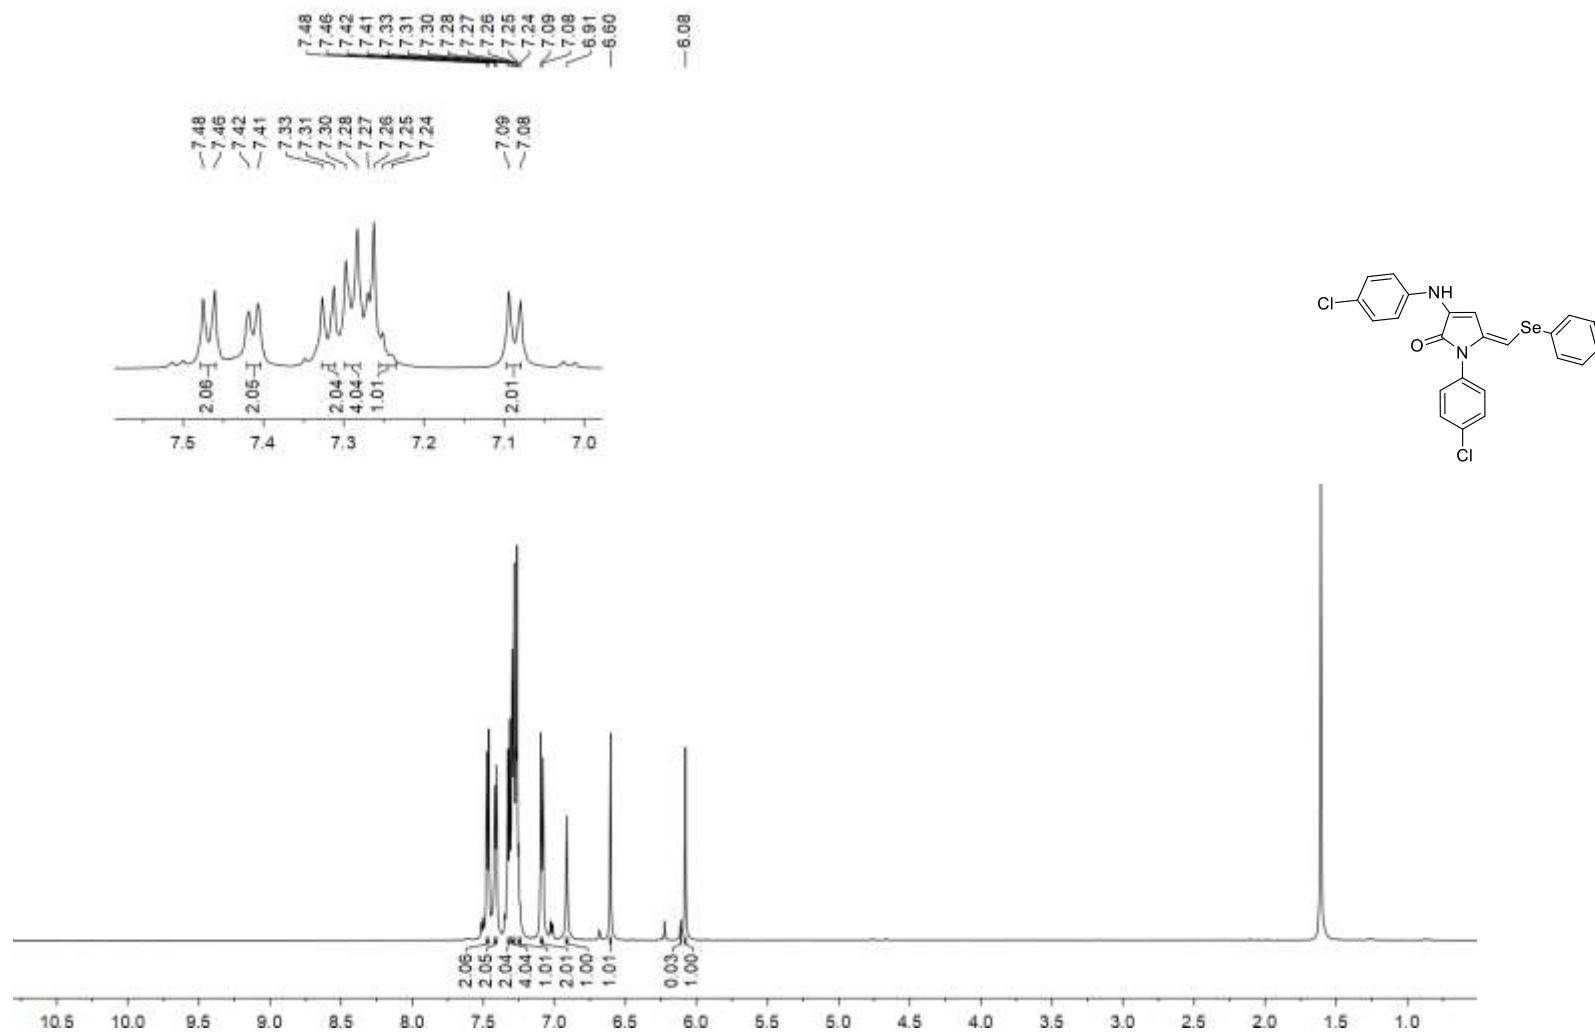

Figure S66.  $^1\text{H}$  NMR (600 MHz,  $\text{CDCl}_3$ ) spectra of compound **6e**

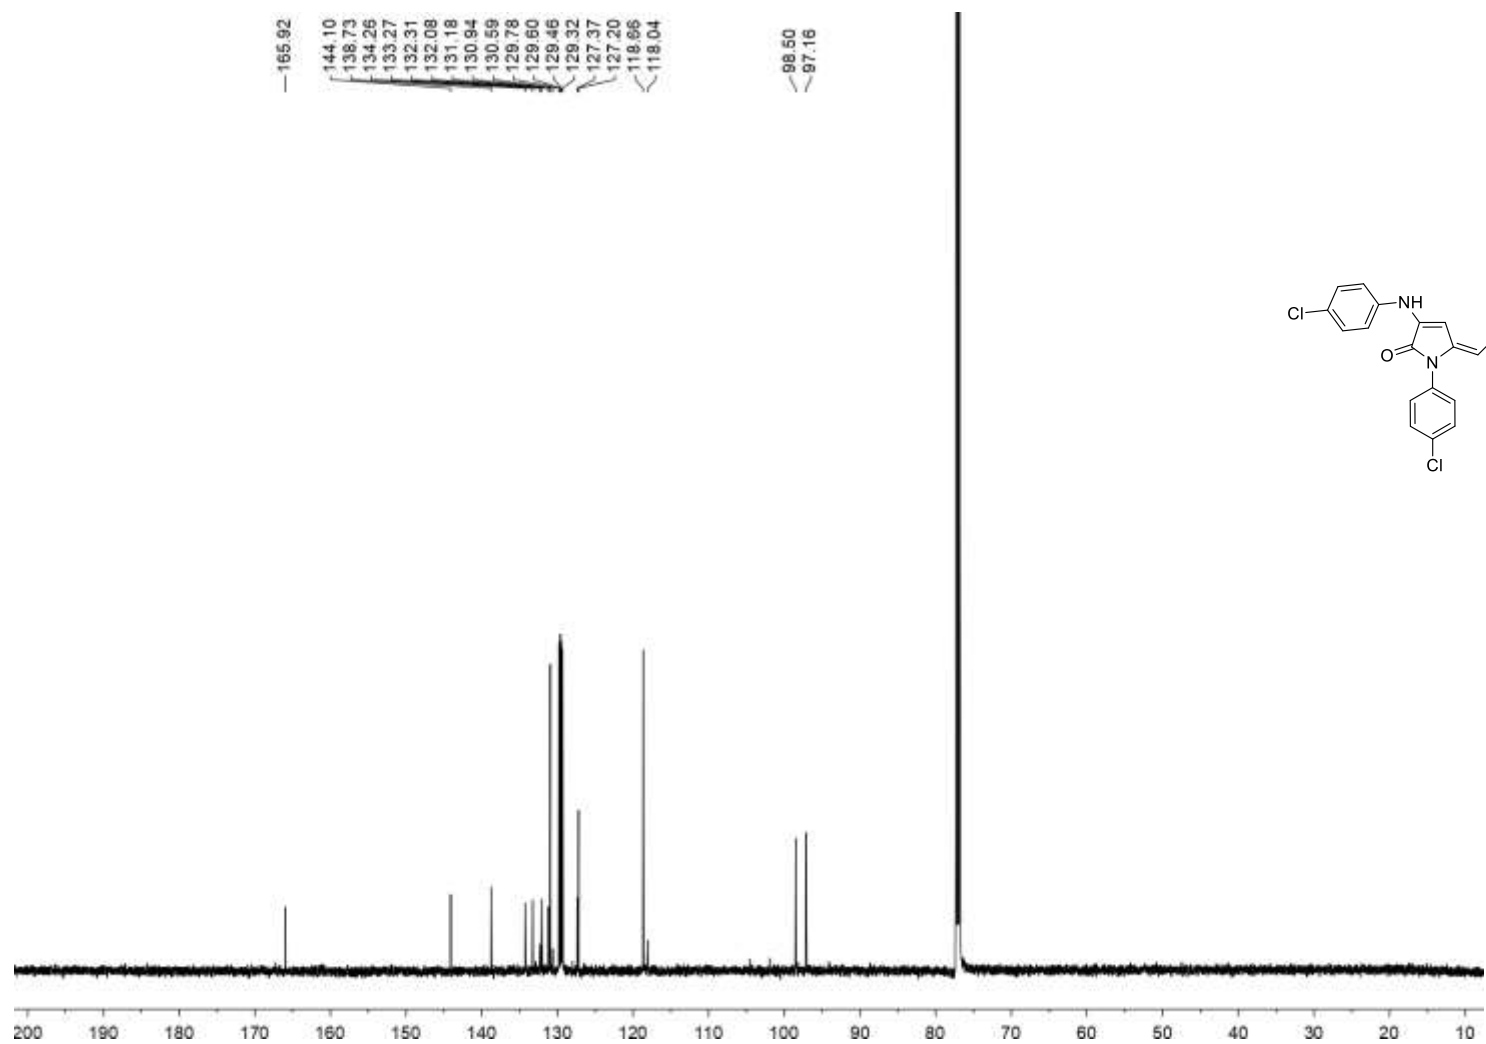

Figure S67. <sup>13</sup>C NMR (150 MHz, CDCl<sub>3</sub>) spectra of compound 6e

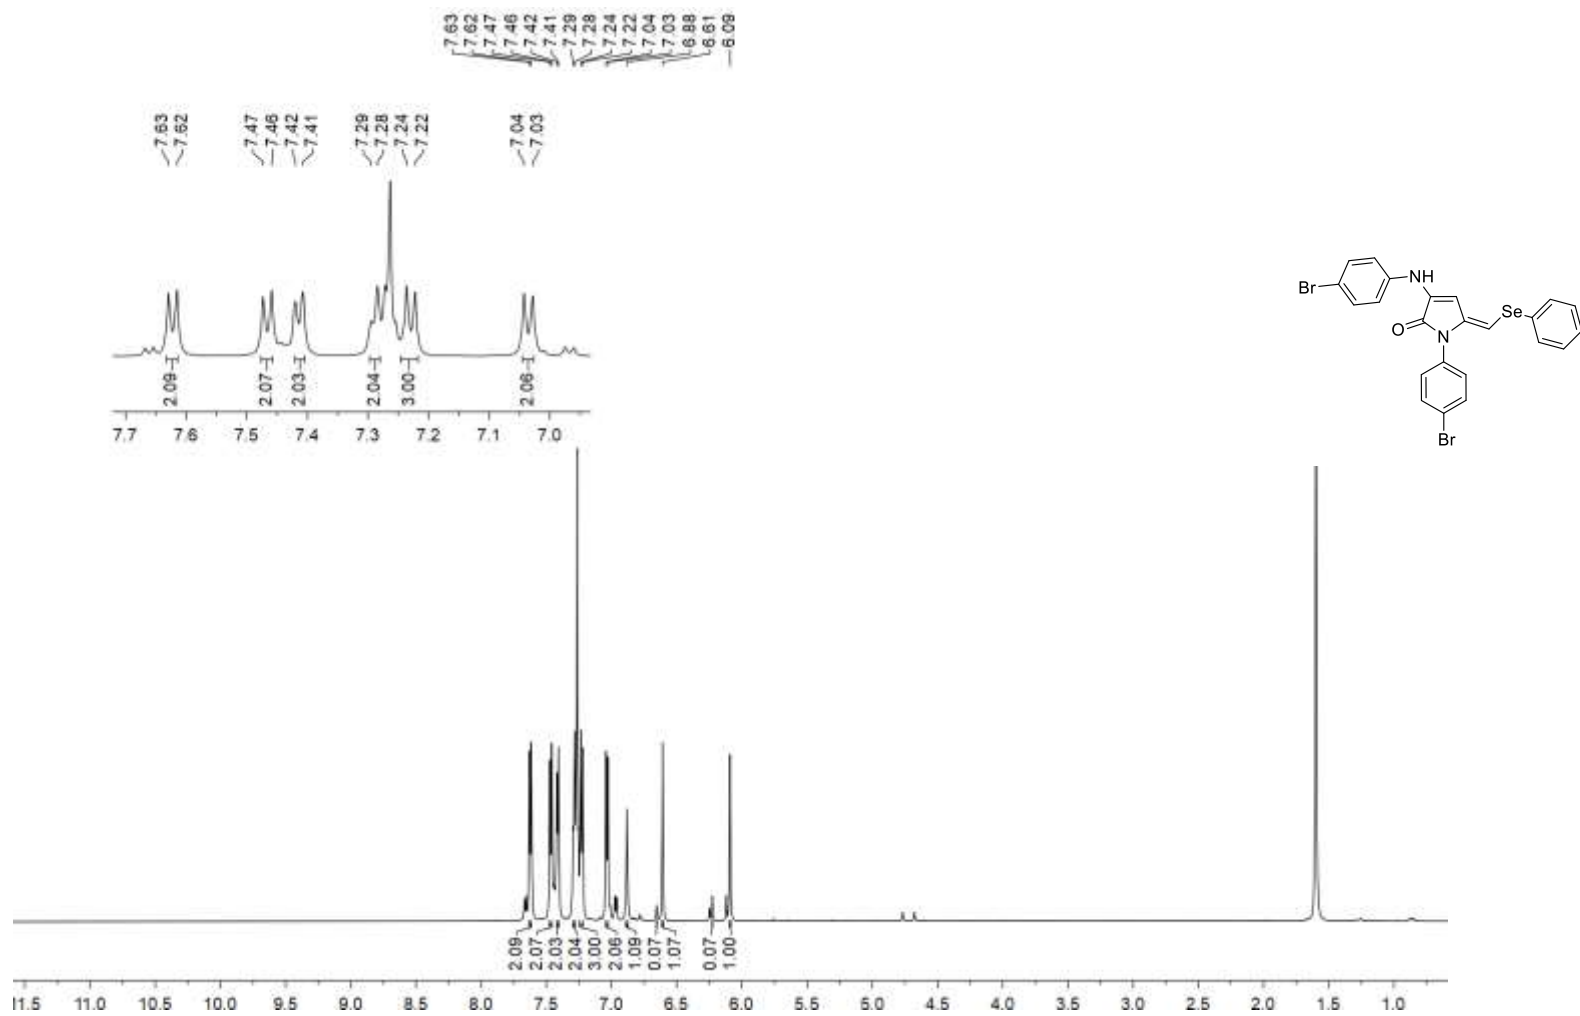

Figure S68. <sup>1</sup>H NMR (600 MHz, CDCl<sub>3</sub>) spectra of compound **6f**

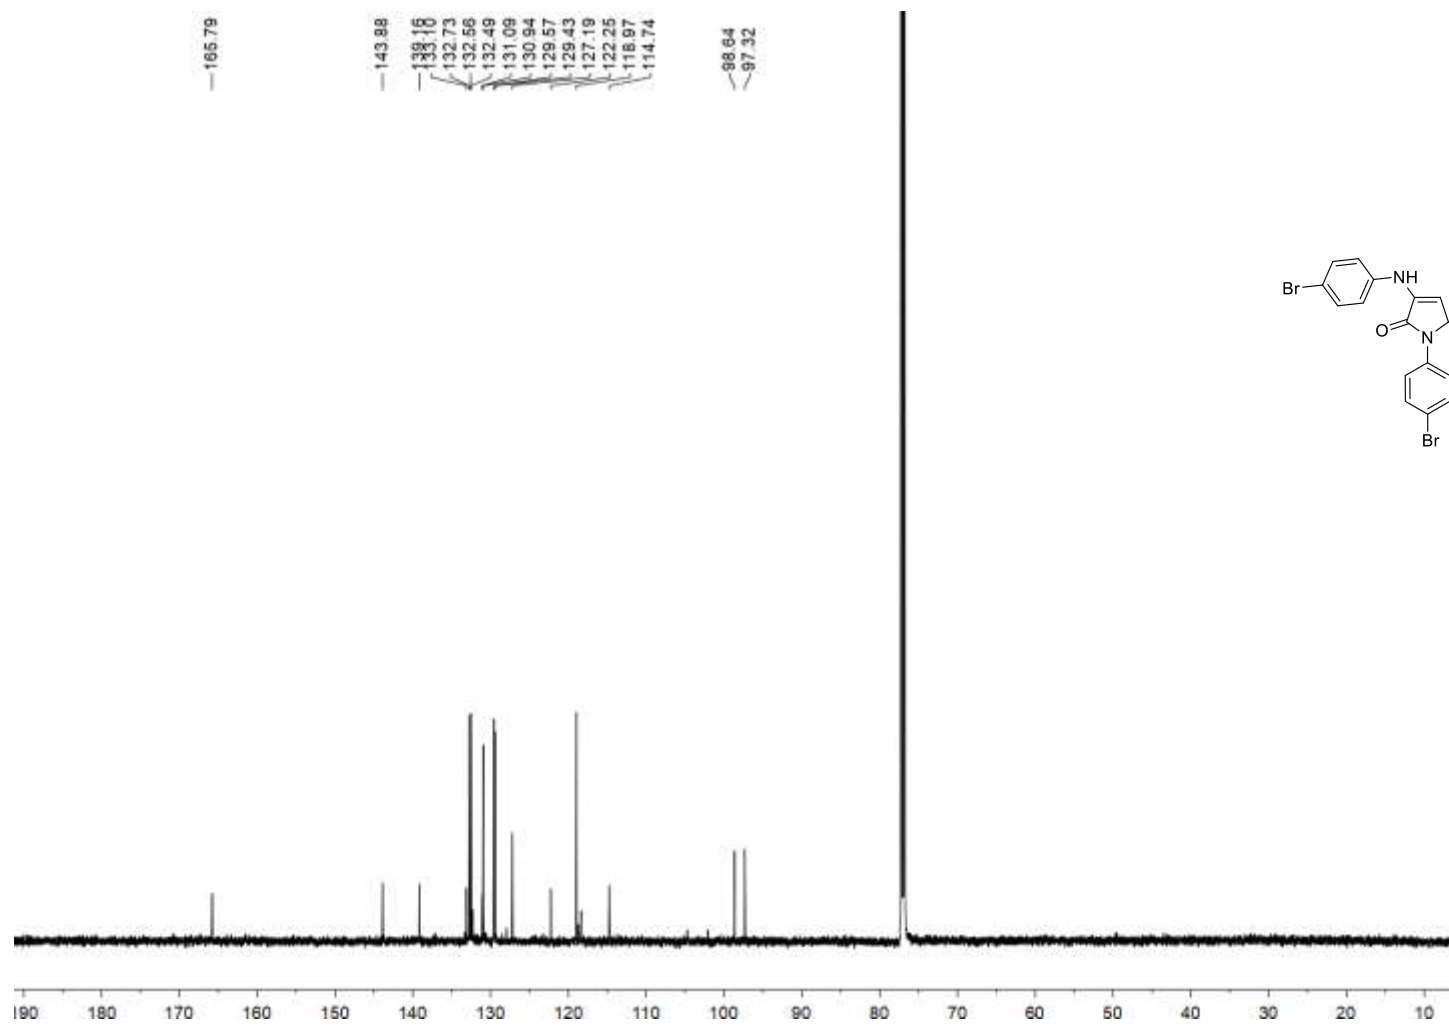

**Figure S69.** <sup>13</sup>C NMR (150 MHz, CDCl<sub>3</sub>) spectra of compound **6f**

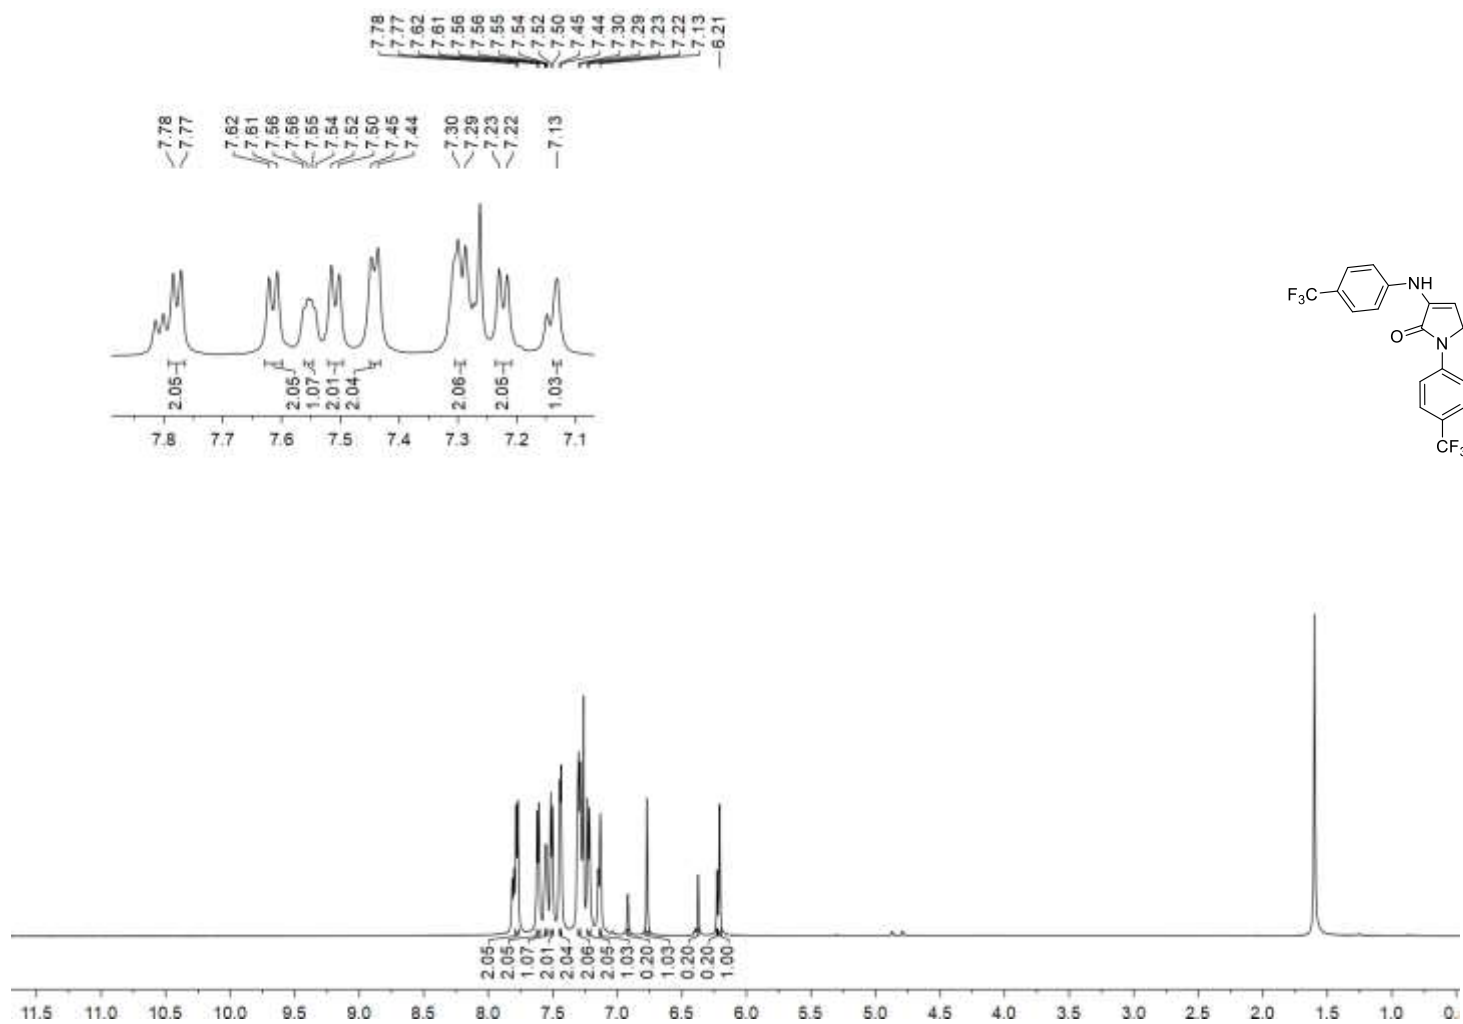

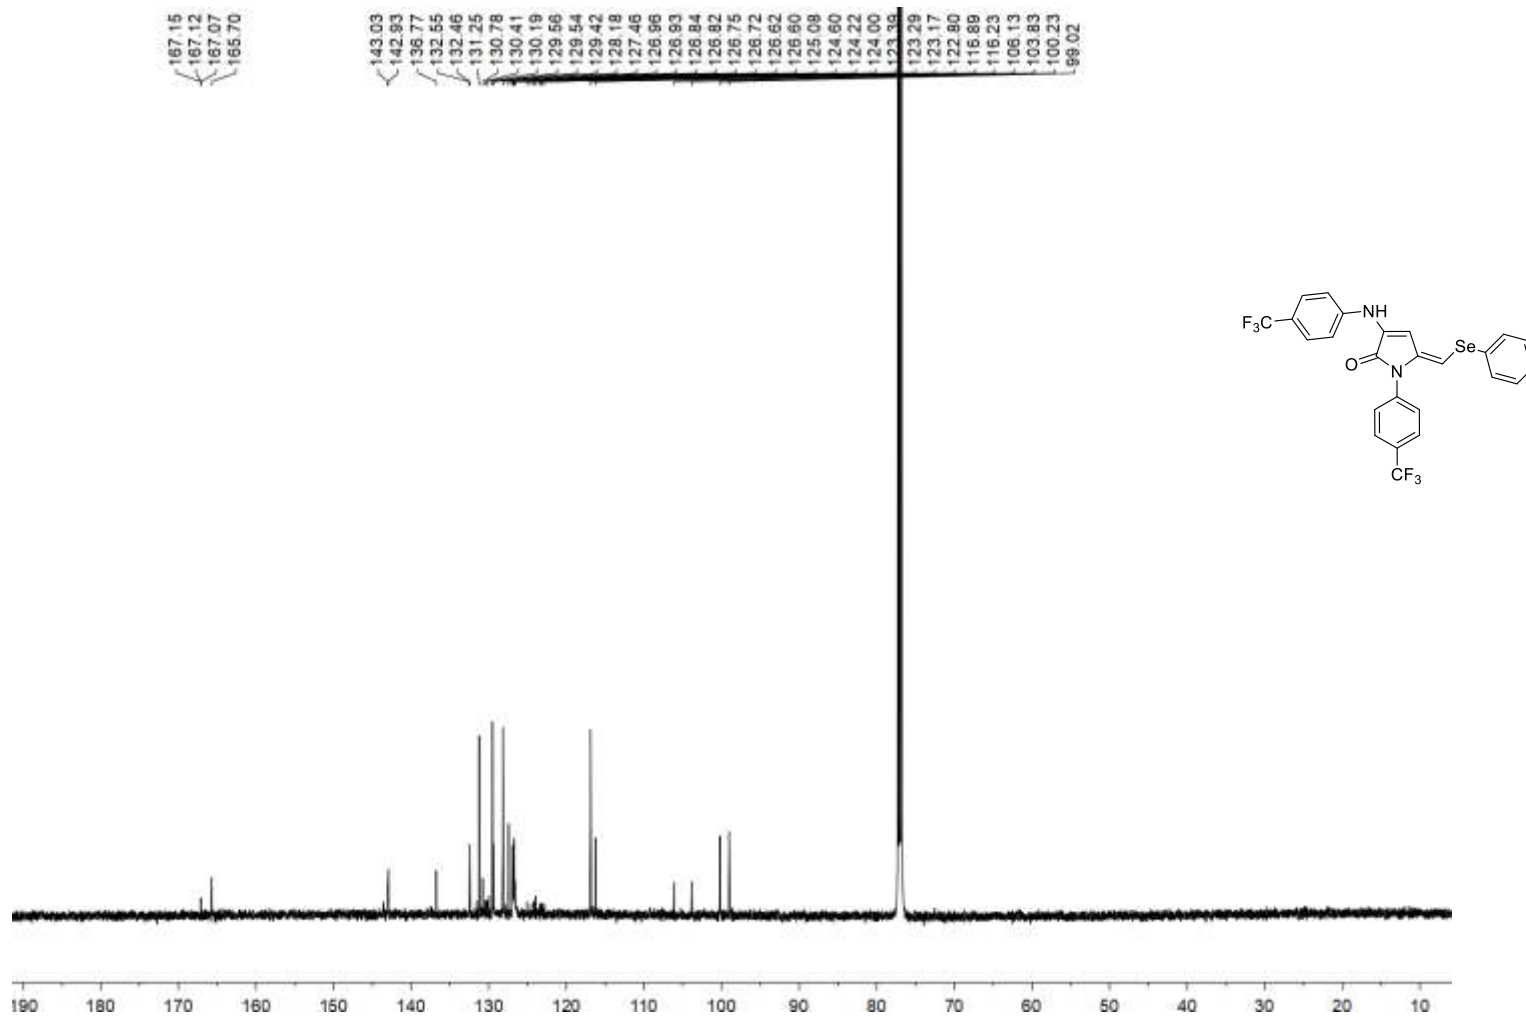

Figure S71. <sup>13</sup>C NMR (150 MHz, CDCl<sub>3</sub>) spectra of compound **6g**

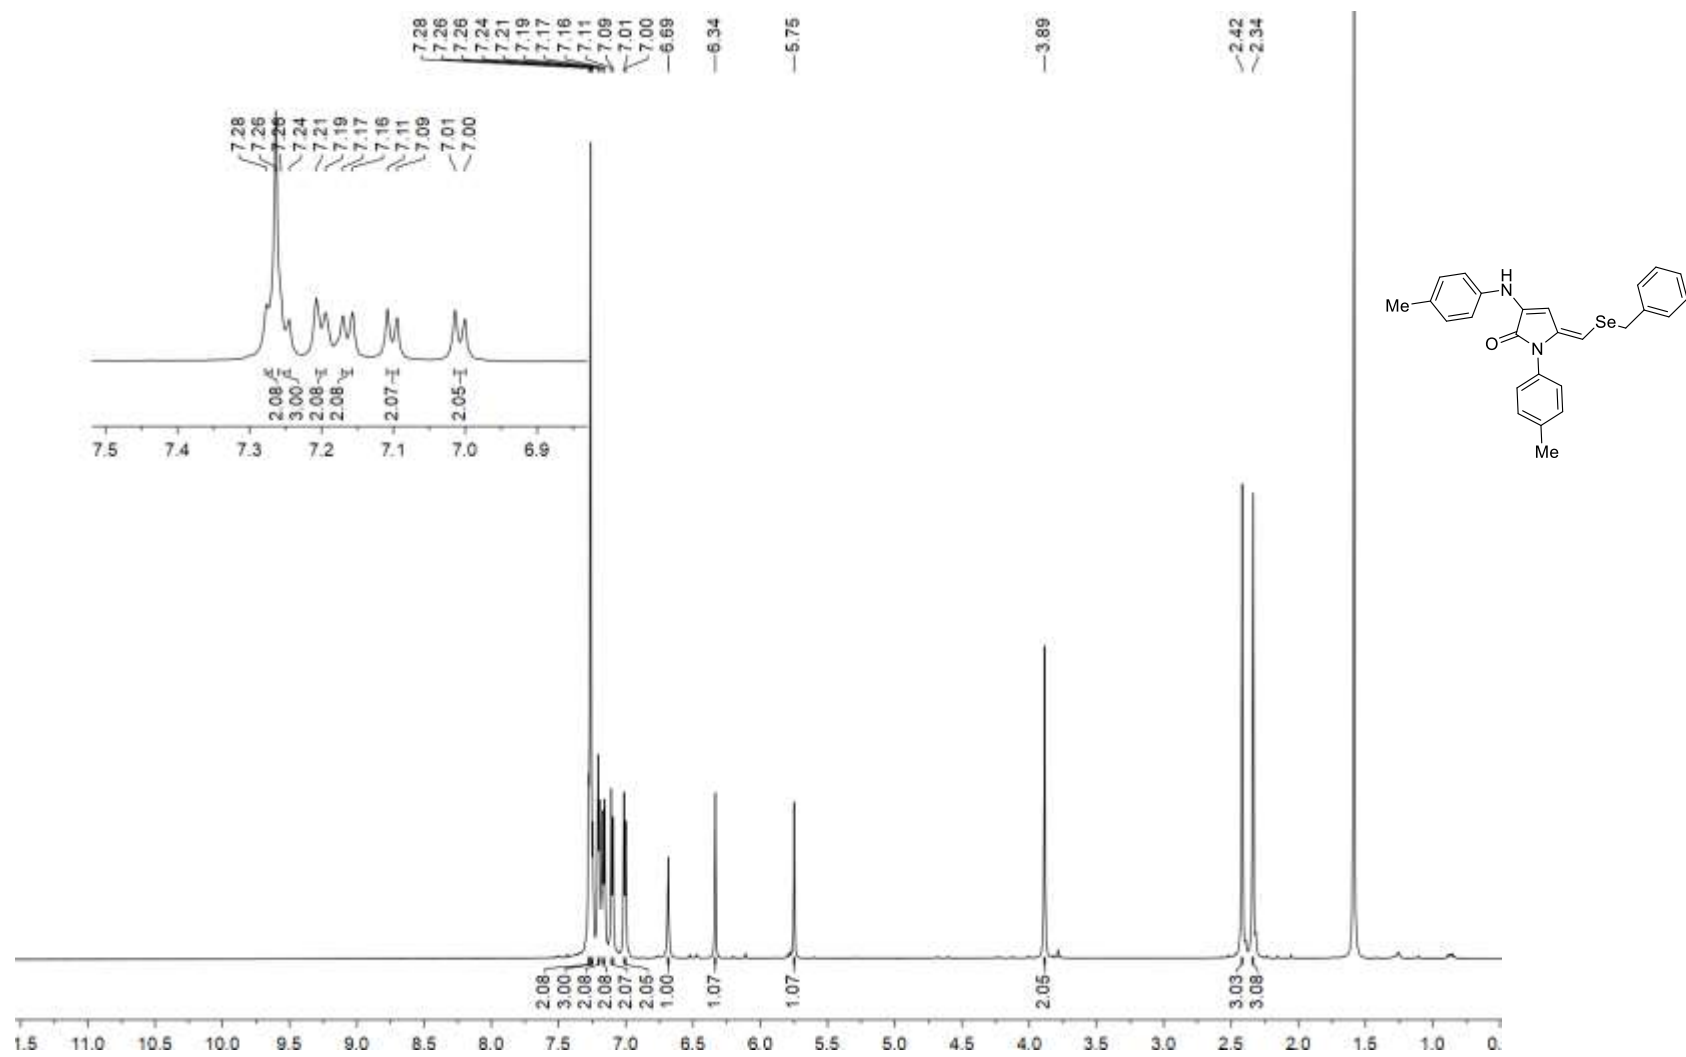



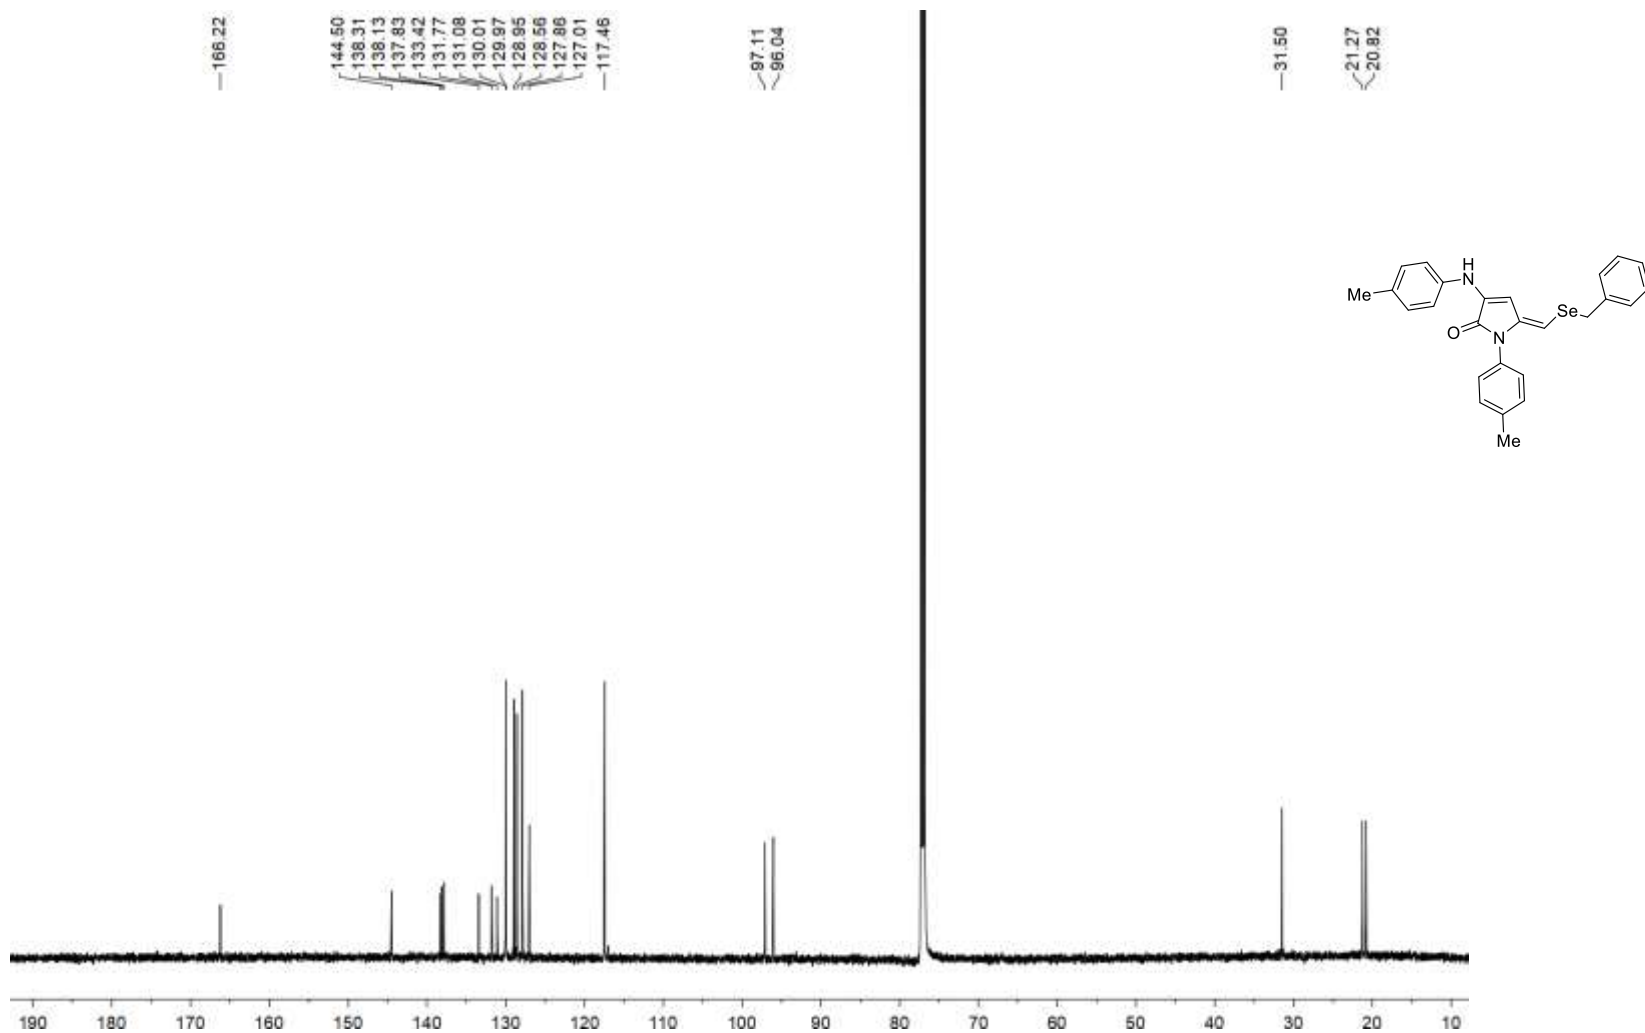

Figure S73. <sup>13</sup>C NMR (150 MHz, CDCl<sub>3</sub>) spectra of compound **6h**

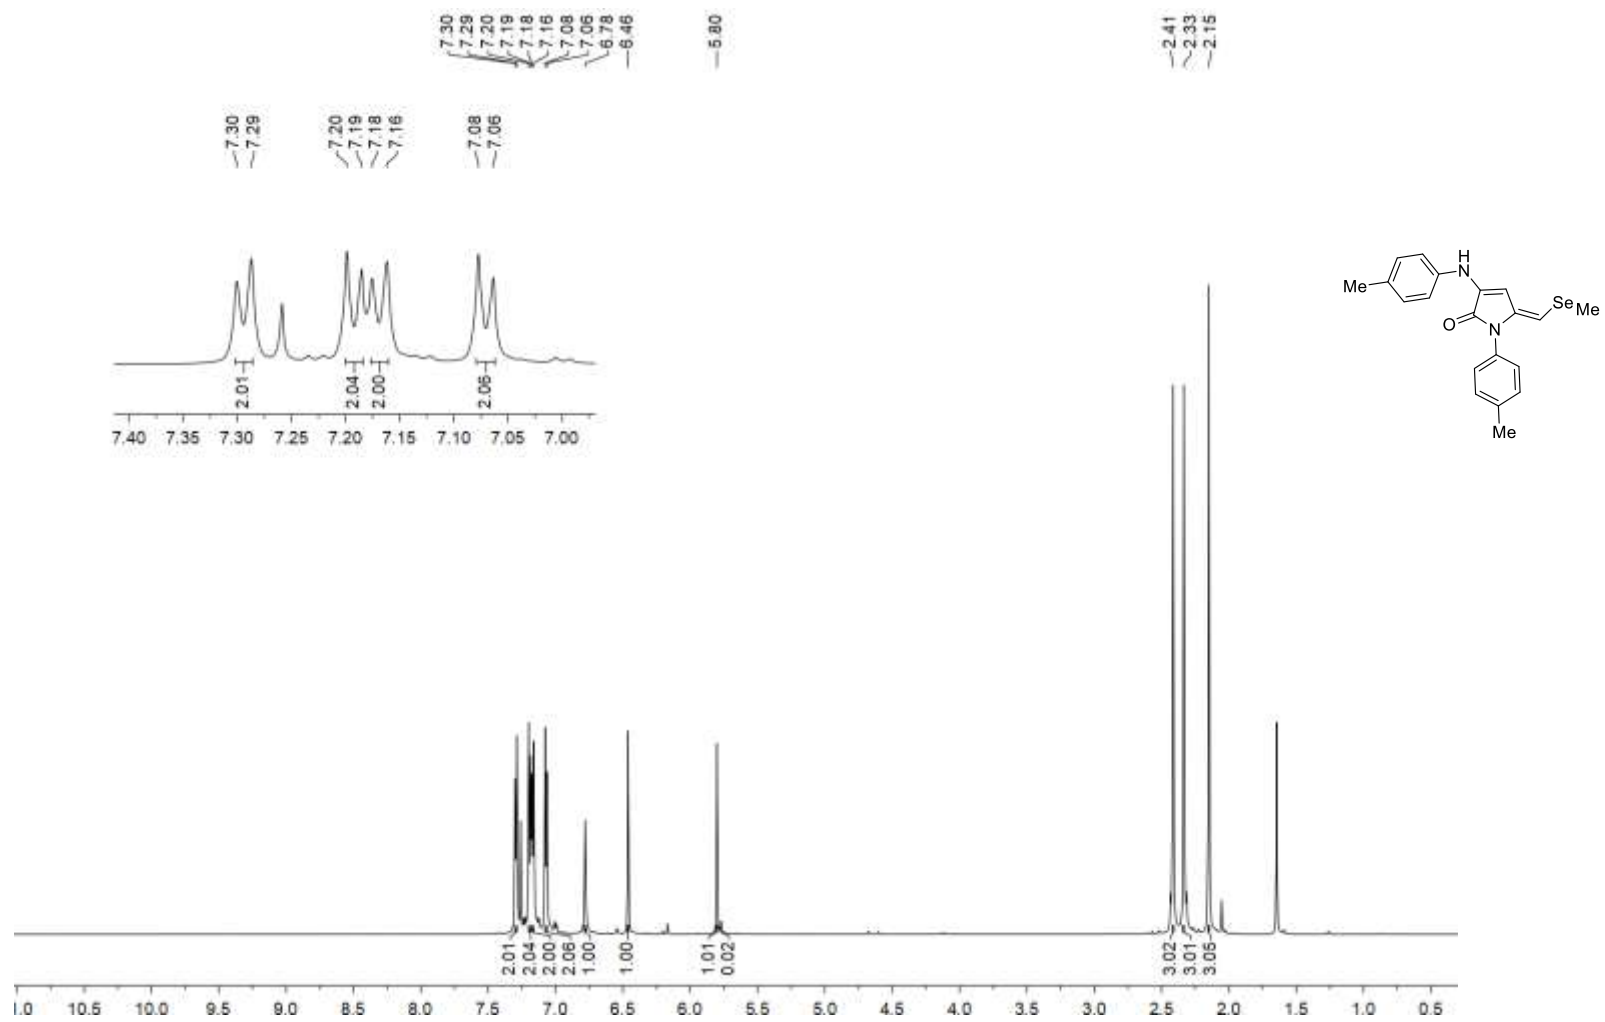

Figure S74. <sup>1</sup>H NMR (600 MHz, CDCl<sub>3</sub>) spectra of compound **6i**

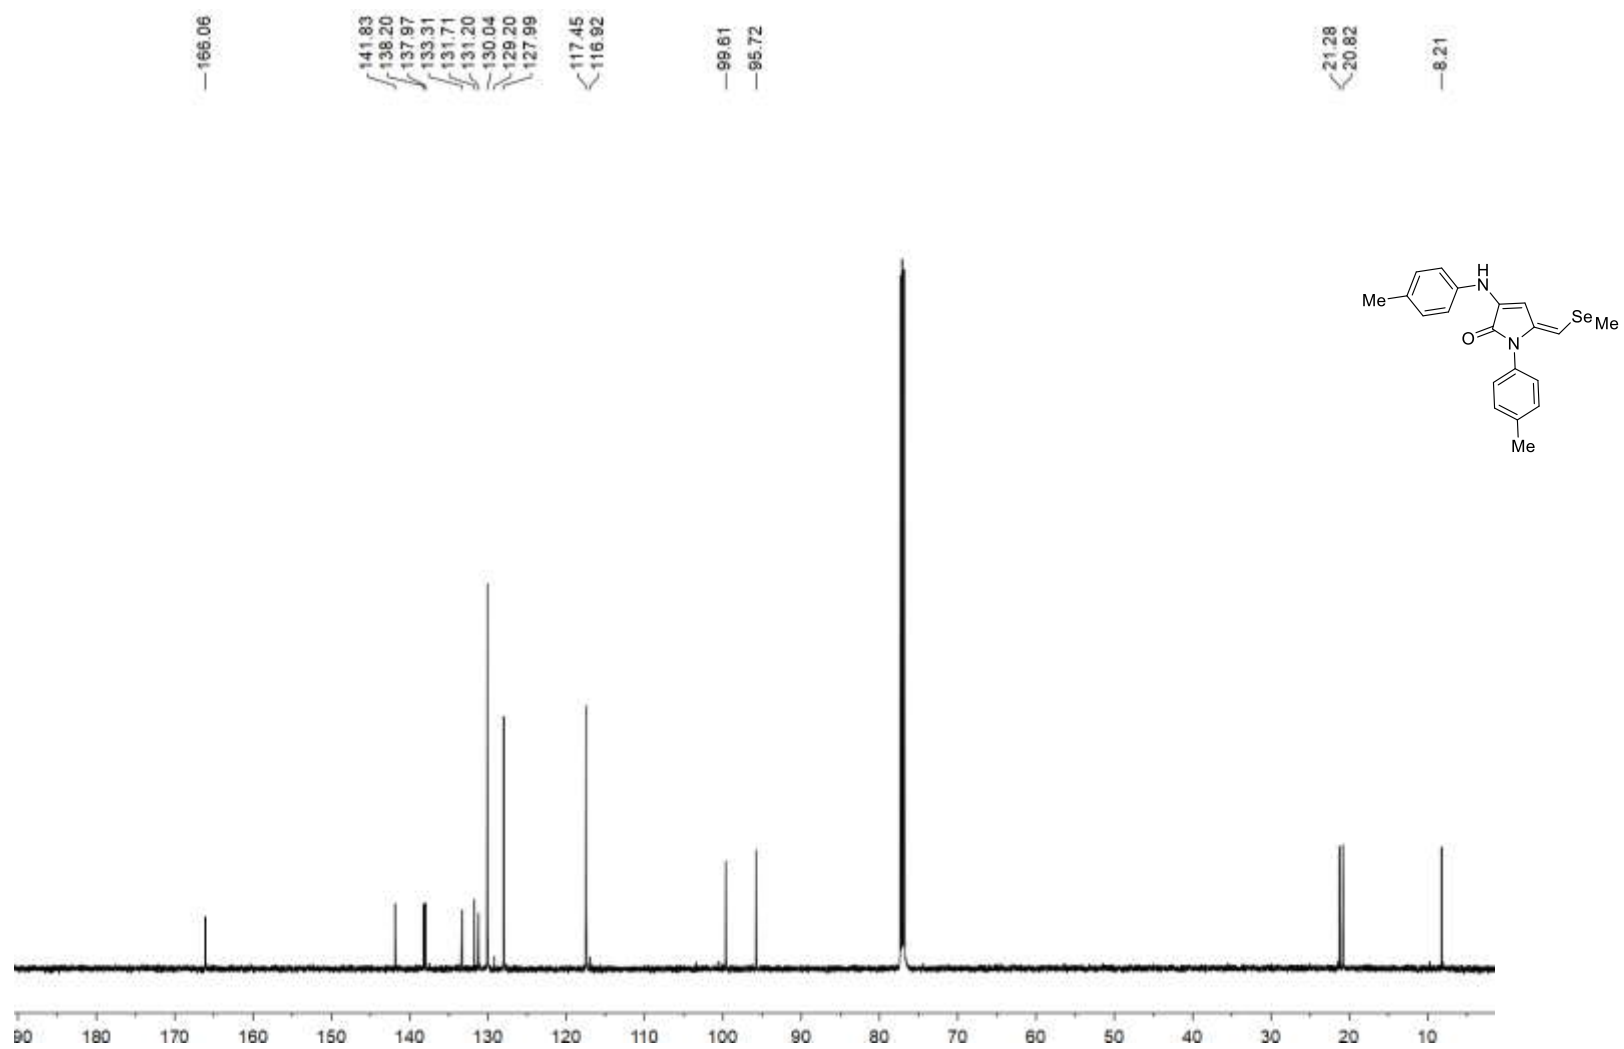

Figure S75. <sup>13</sup>C NMR (150 MHz, CDCl<sub>3</sub>) spectra of compound **6i**

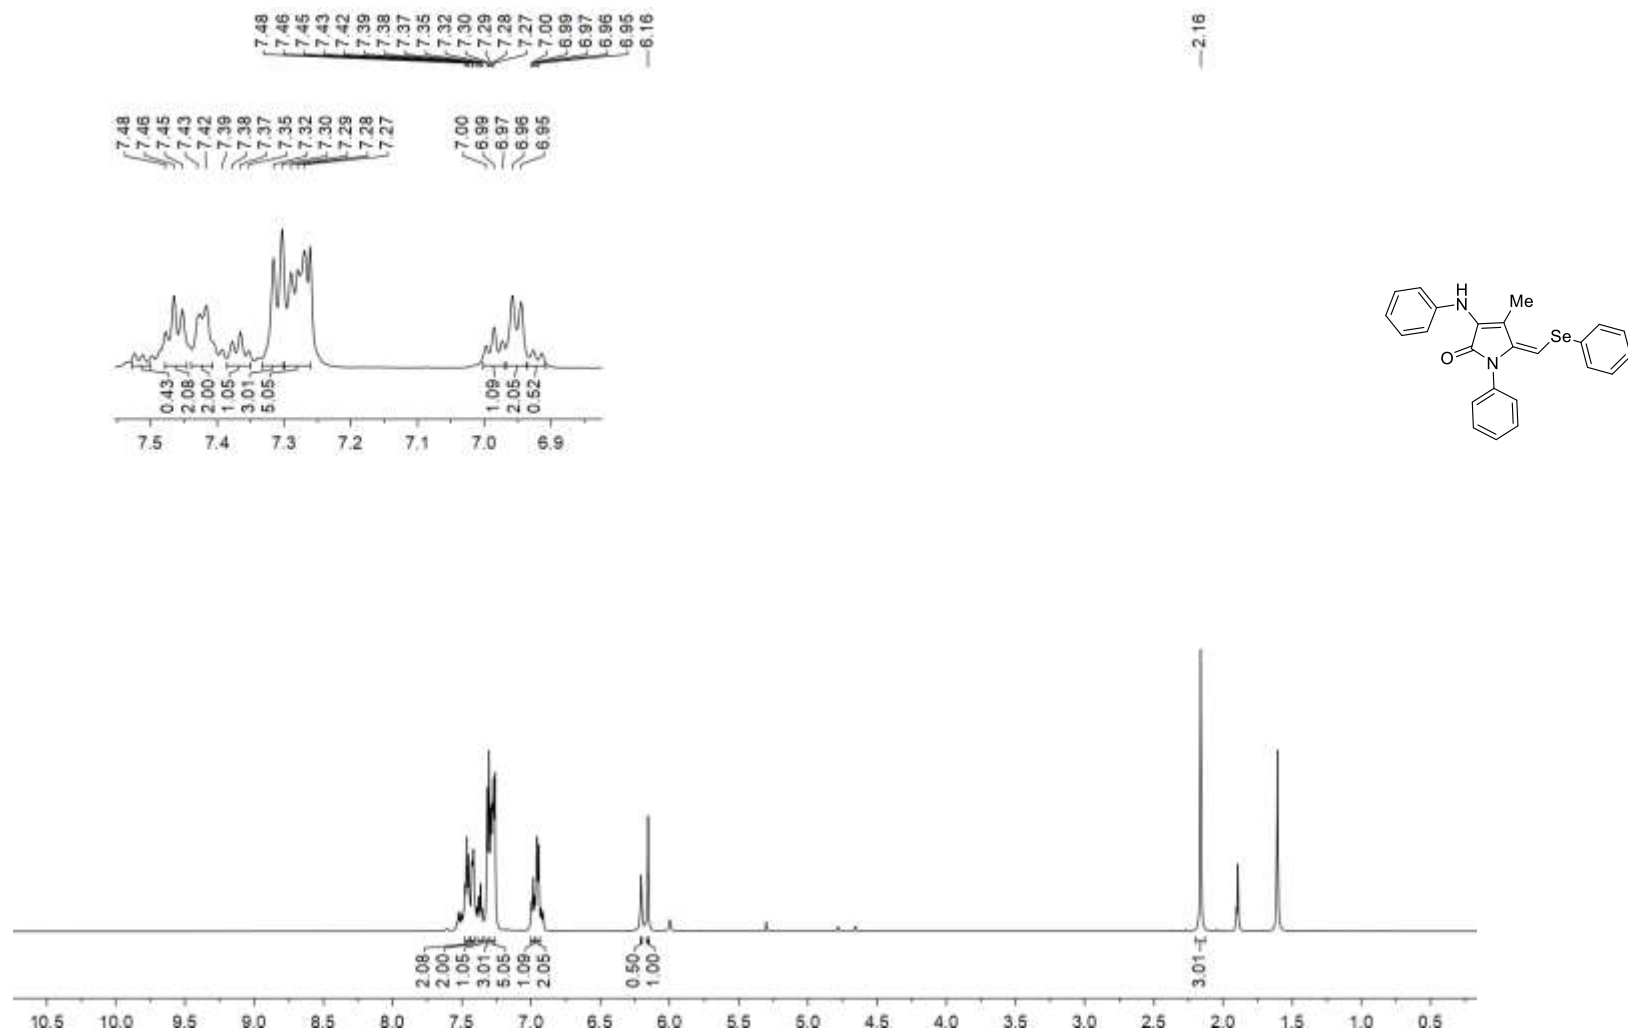

Figure S76.  $^1\text{H}$  NMR (600 MHz,  $\text{CDCl}_3$ ) spectra of compound **6j**

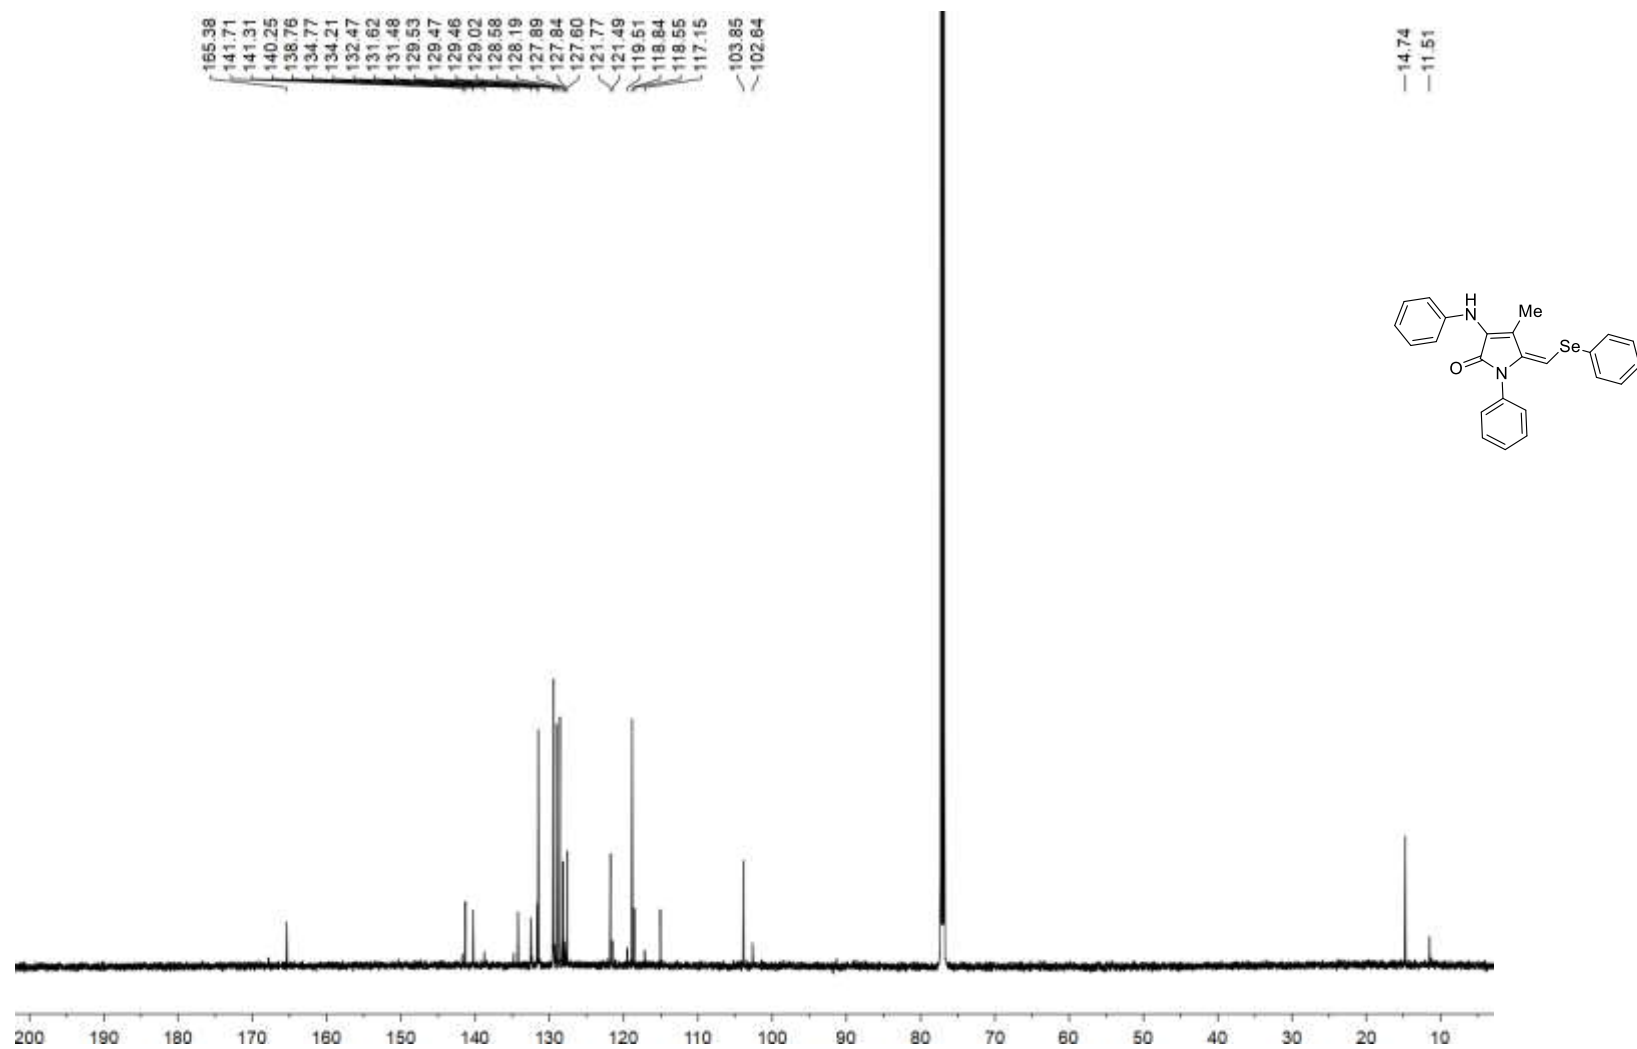

Figure S77. <sup>13</sup>C NMR (150 MHz, CDCl<sub>3</sub>) spectra of compound **6j**

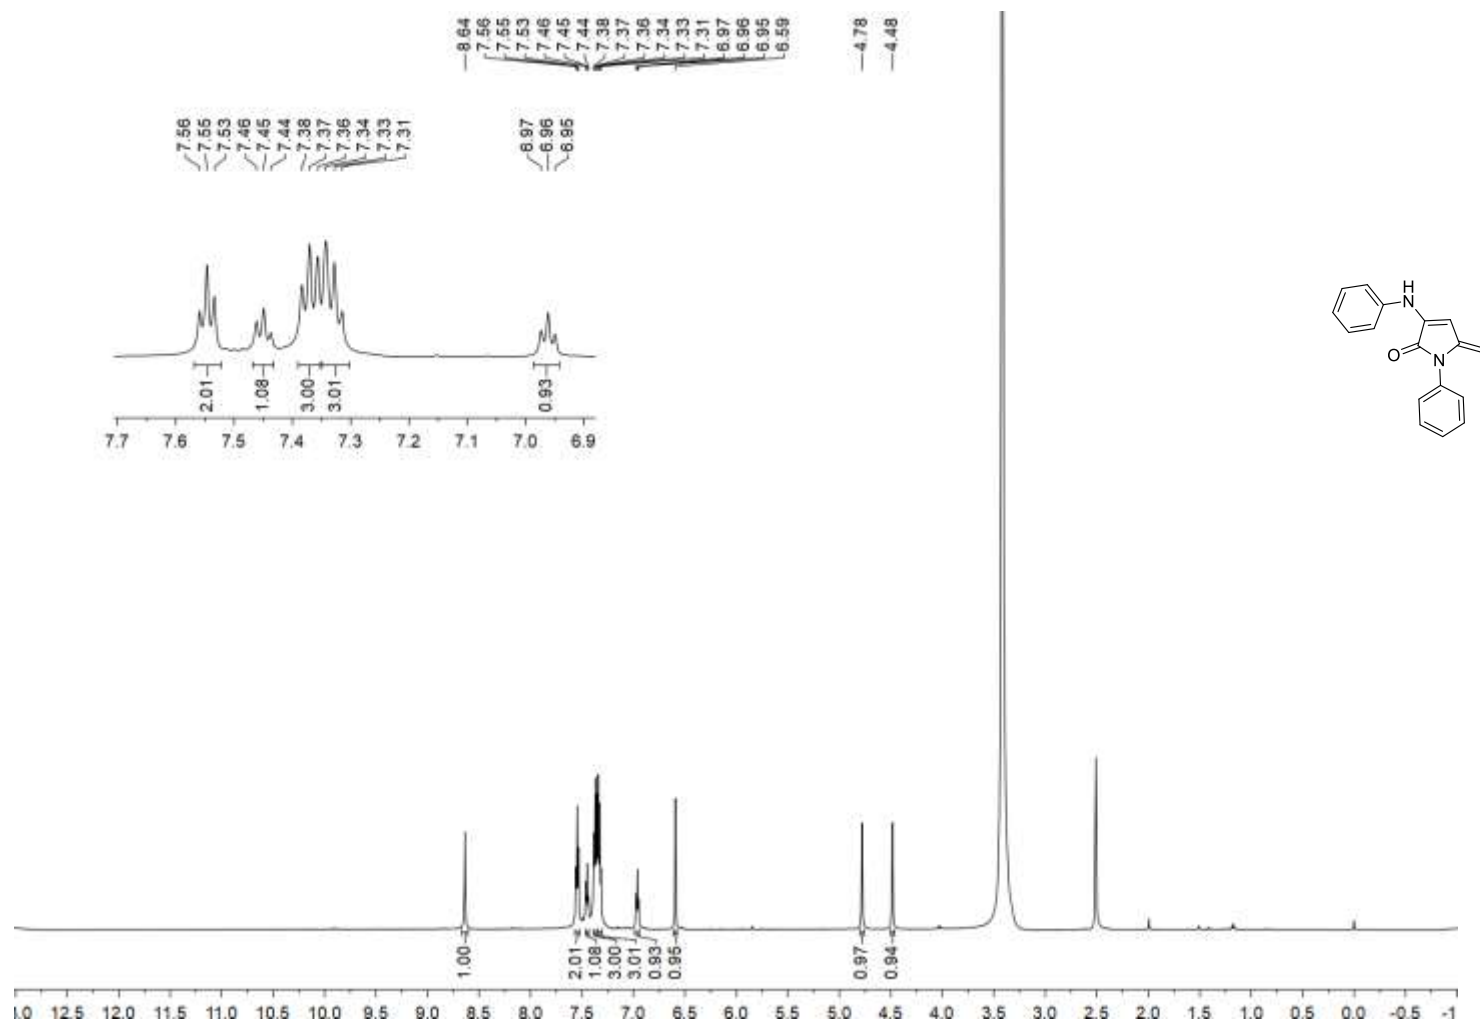

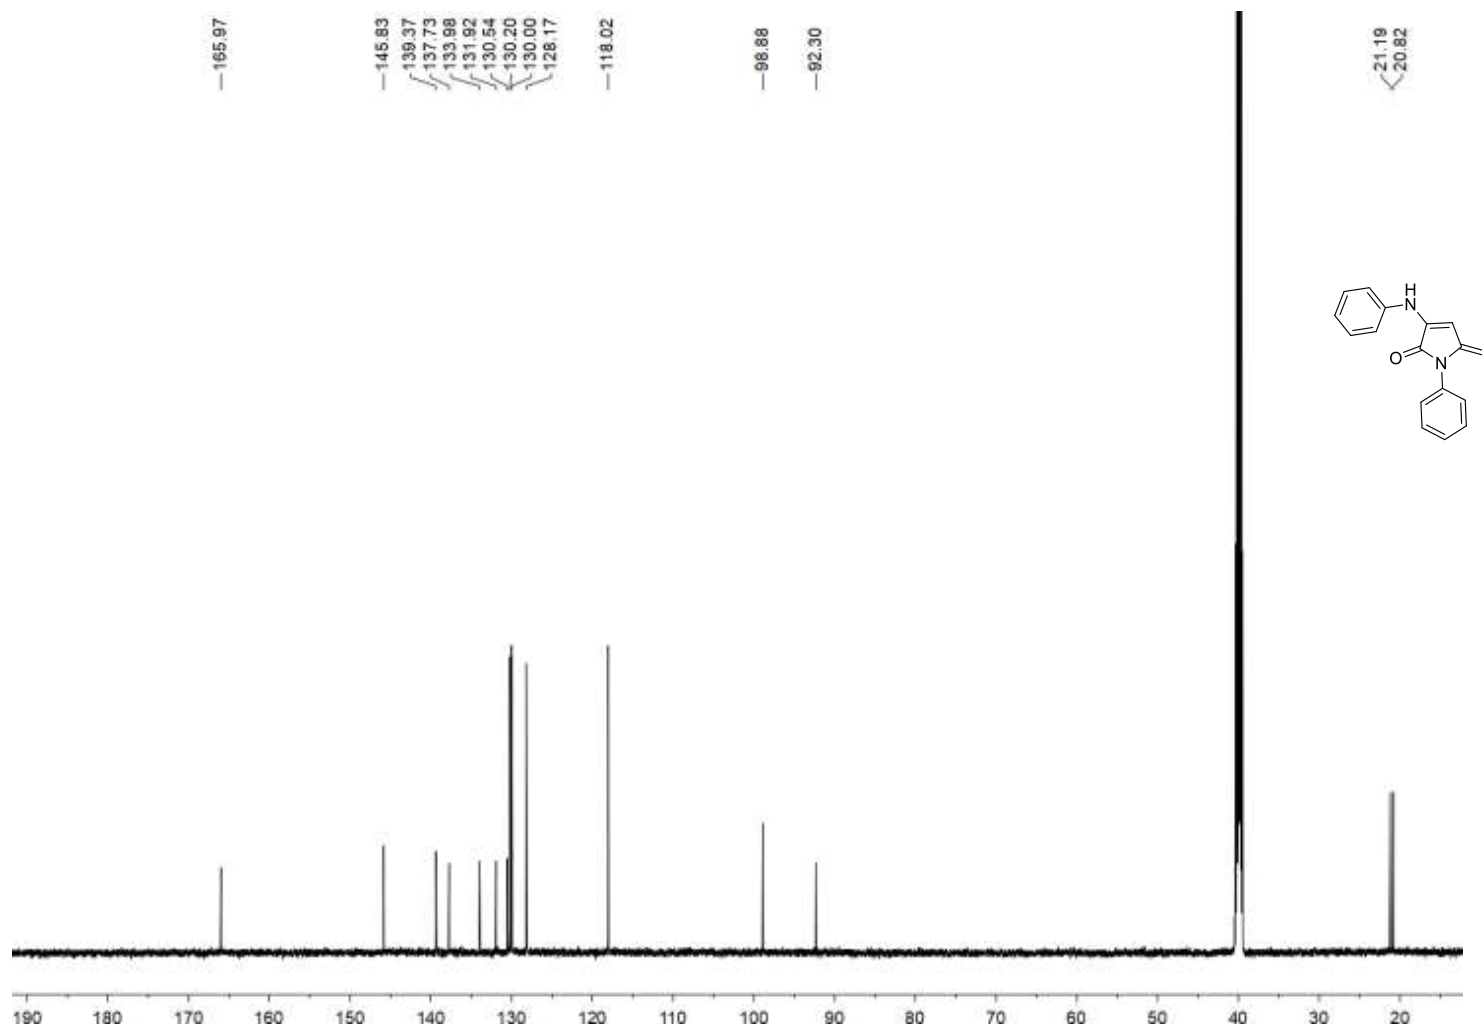

Figure S79. <sup>13</sup>C NMR (150 MHz, DMSO-*d*<sub>6</sub>) spectra of compound 7a

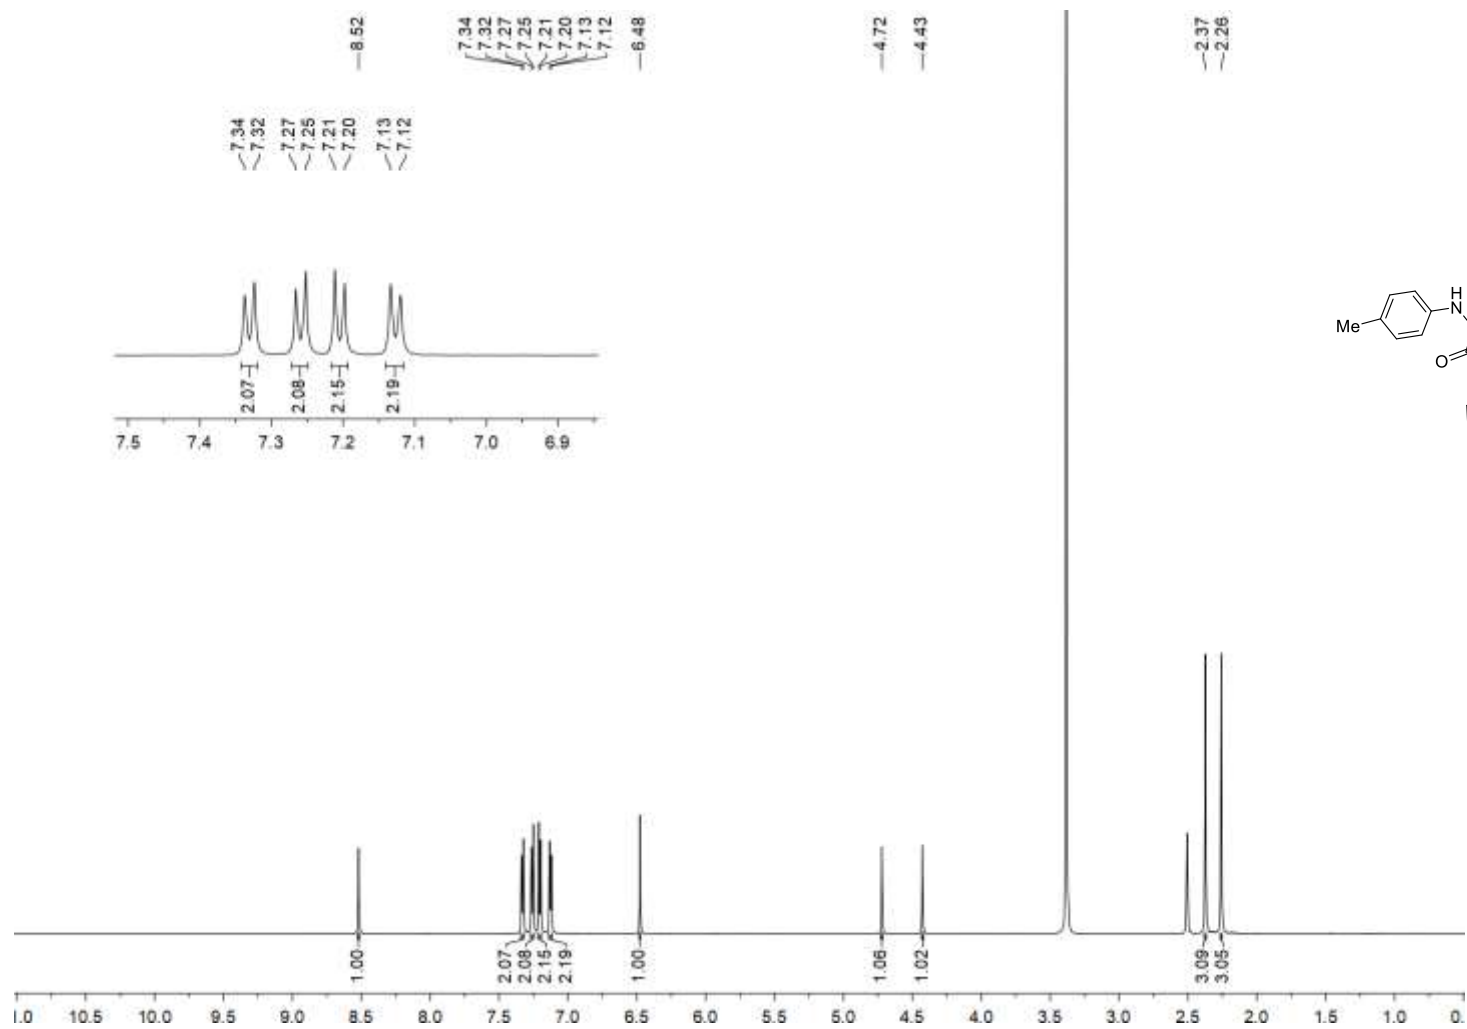

**Figure S80.** <sup>1</sup>H NMR (600 MHz, DMSO-*d*<sub>6</sub>) spectra of compound **7b**



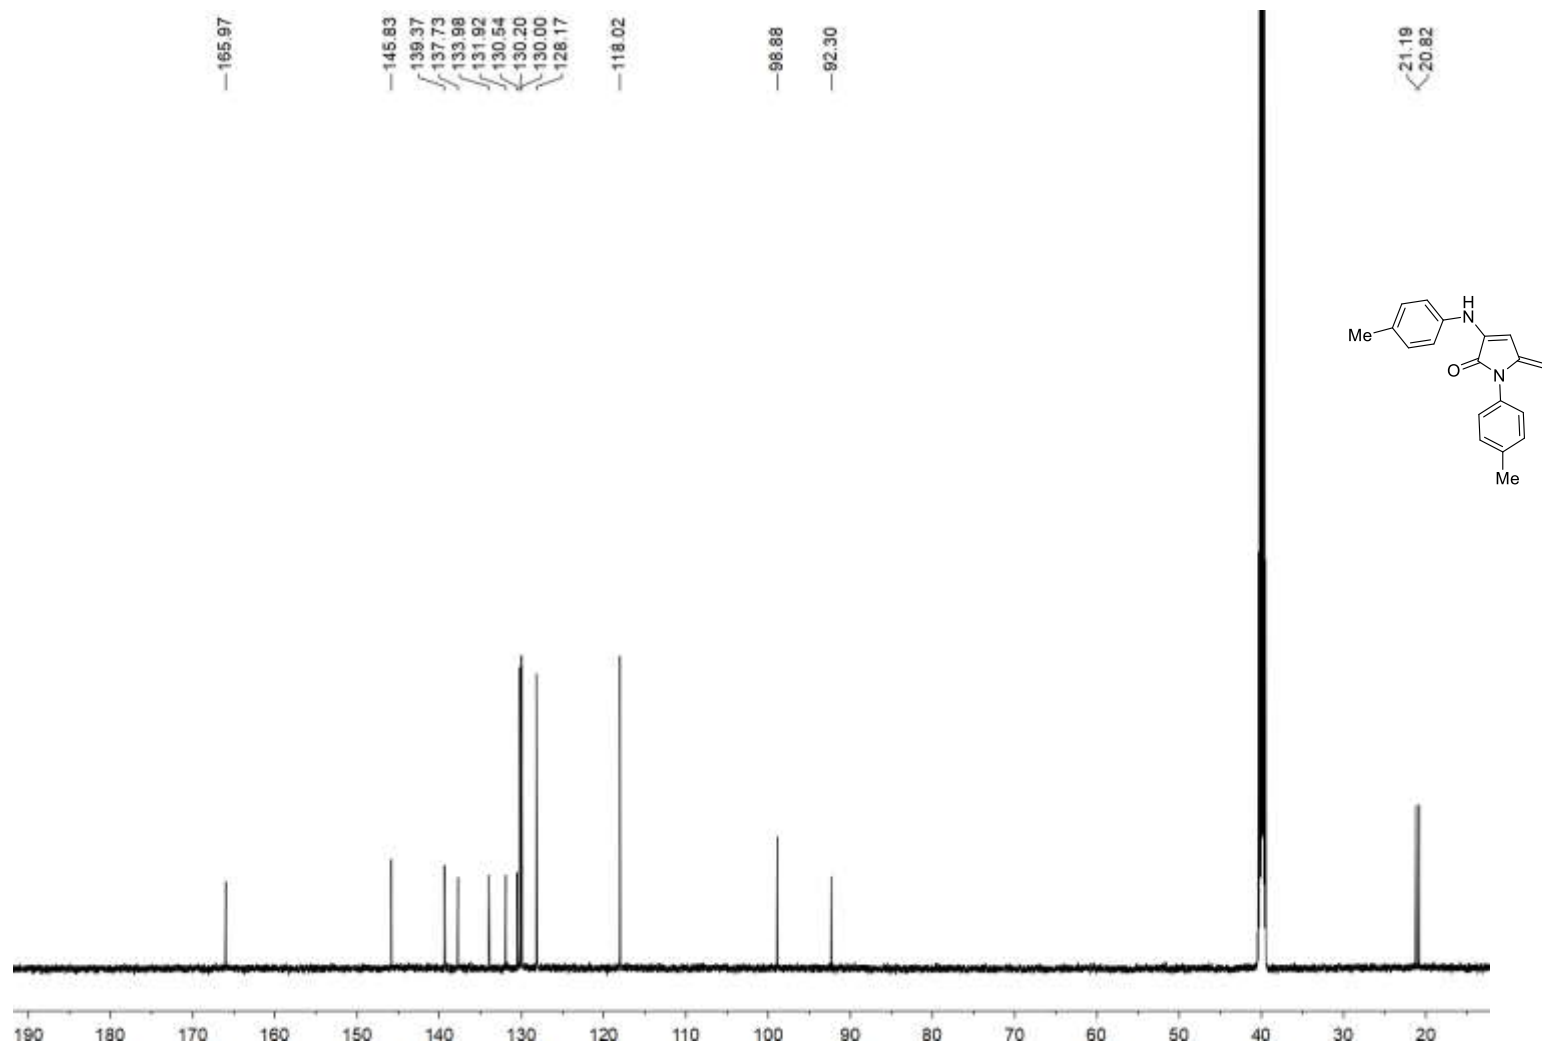

**Figure S81.**  $^{13}\text{C}$  NMR (150 MHz,  $\text{DMSO-}d_6$ ) spectra of compound **7b**

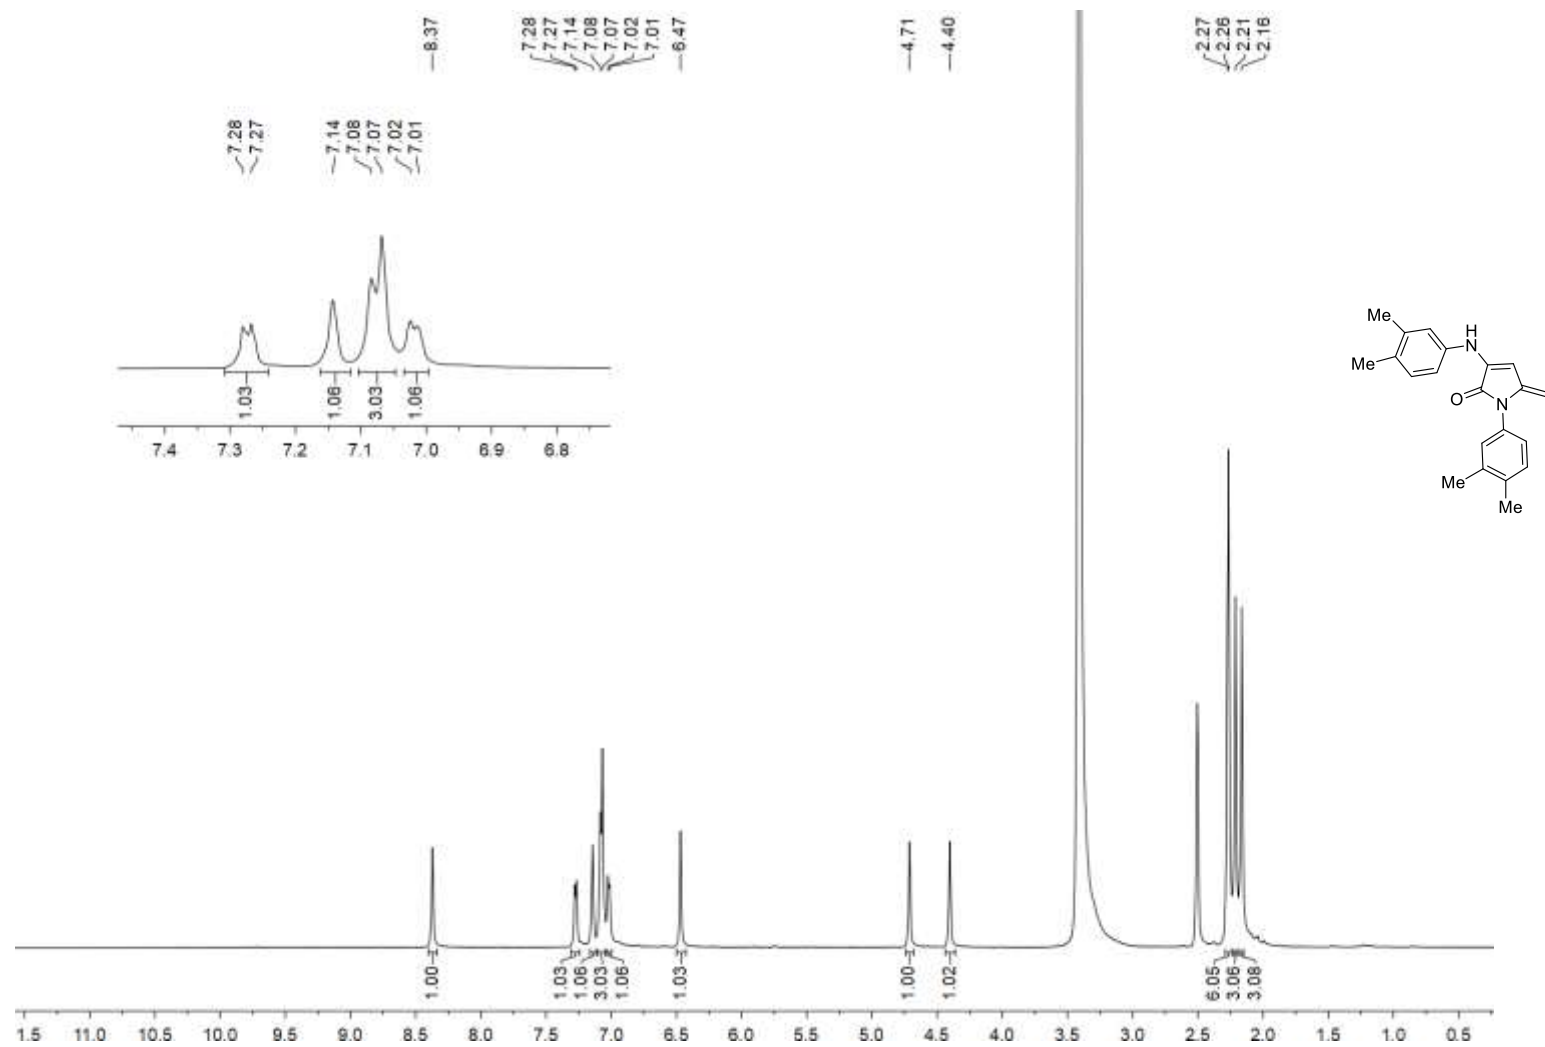

**Figure S82.** <sup>1</sup>H NMR (600 MHz, DMSO-*d*<sub>6</sub>) spectra of compound **7c**

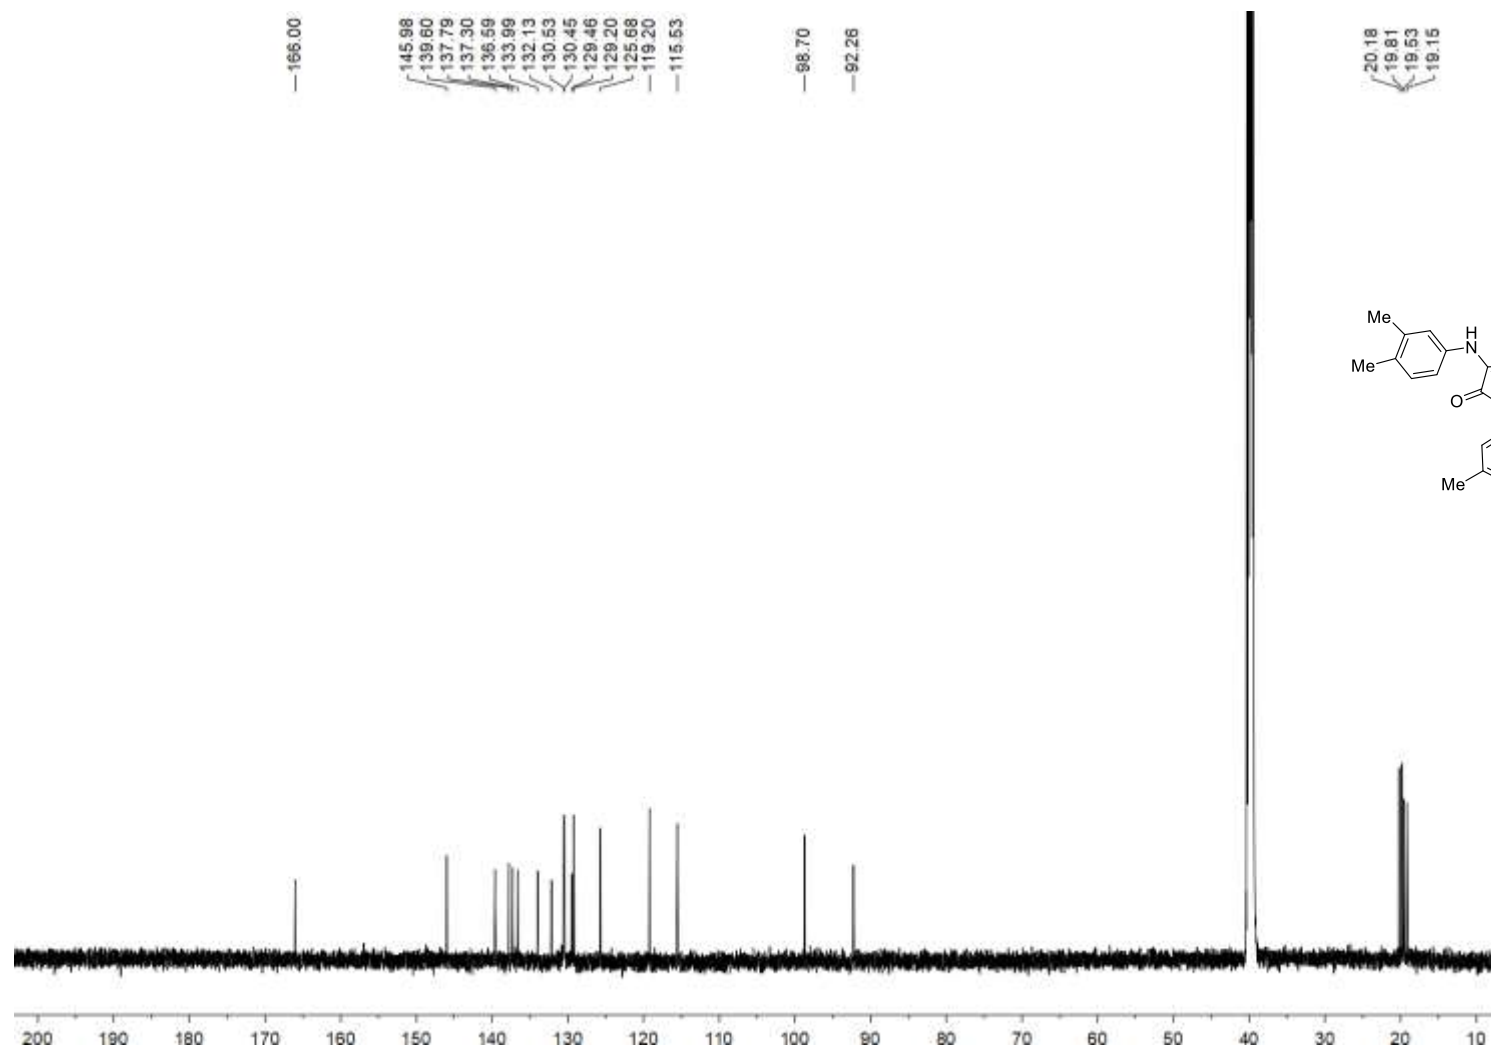

**Figure S83.**  $^{13}\text{C}$  NMR (150 MHz,  $\text{DMSO-}d_6$ ) spectra of compound **7c**

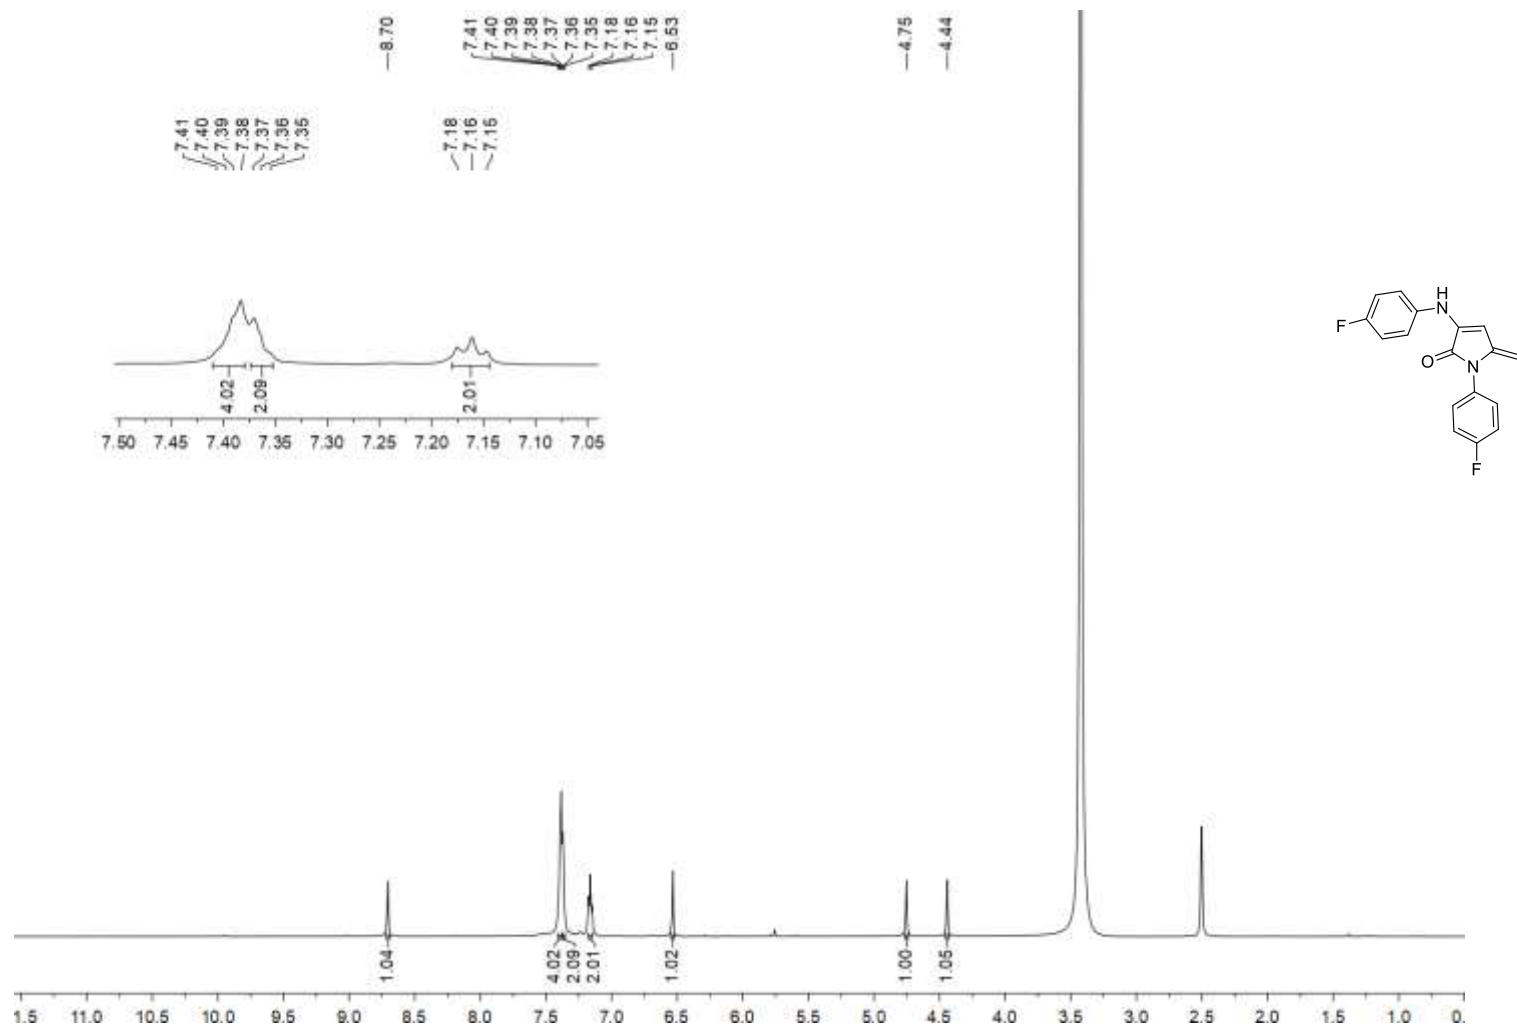

Figure S84.  $^1\text{H}$  NMR (600 MHz,  $\text{DMSO}-d_6$ ) spectra of compound **7d**

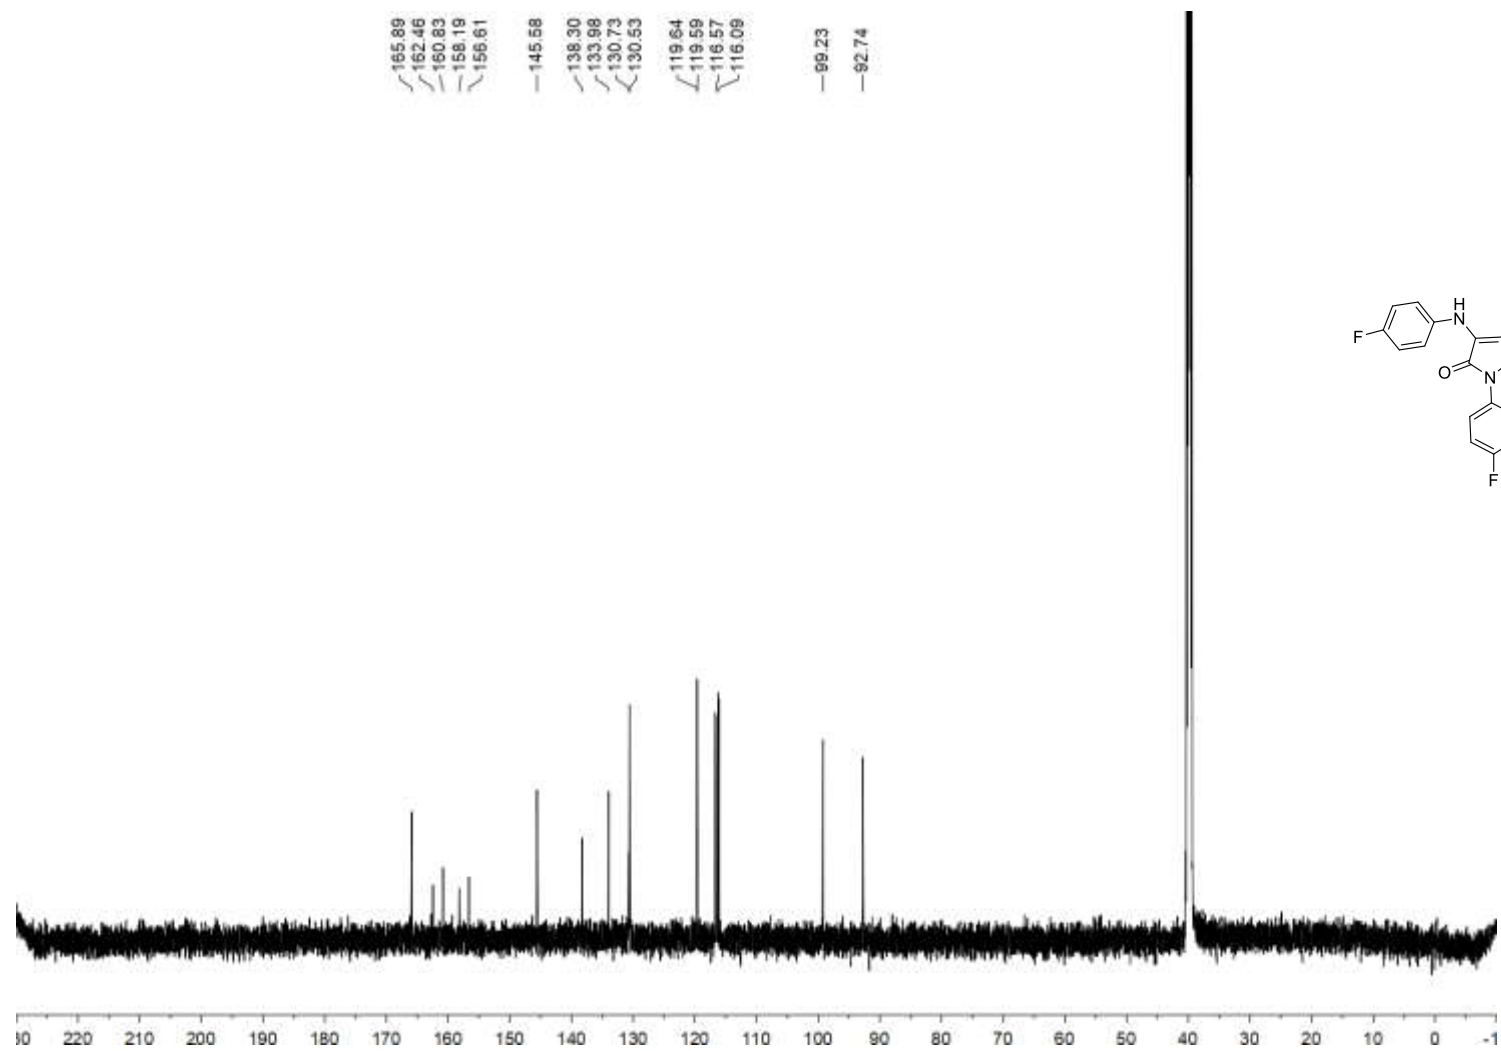

Figure S85.  $^{13}\text{C}$  NMR (150 MHz,  $\text{DMSO-}d_6$ ) spectra of compound **7d**

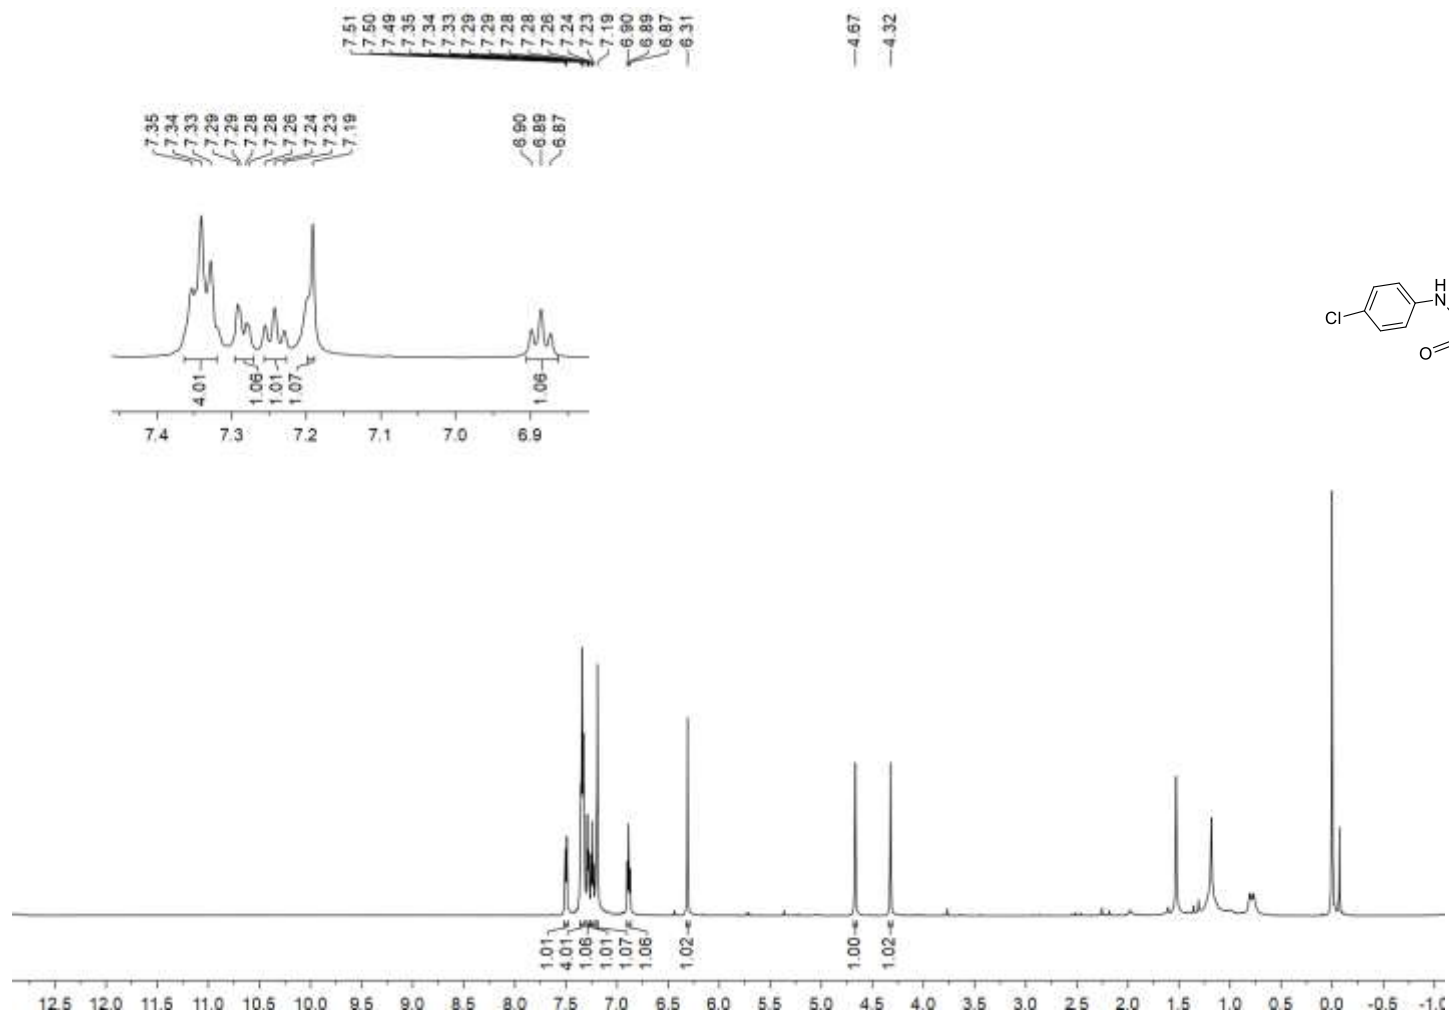

**Figure S86.**  $^1\text{H}$  NMR (600 MHz,  $\text{DMSO-}d_6$ ) spectra of compound **7e**

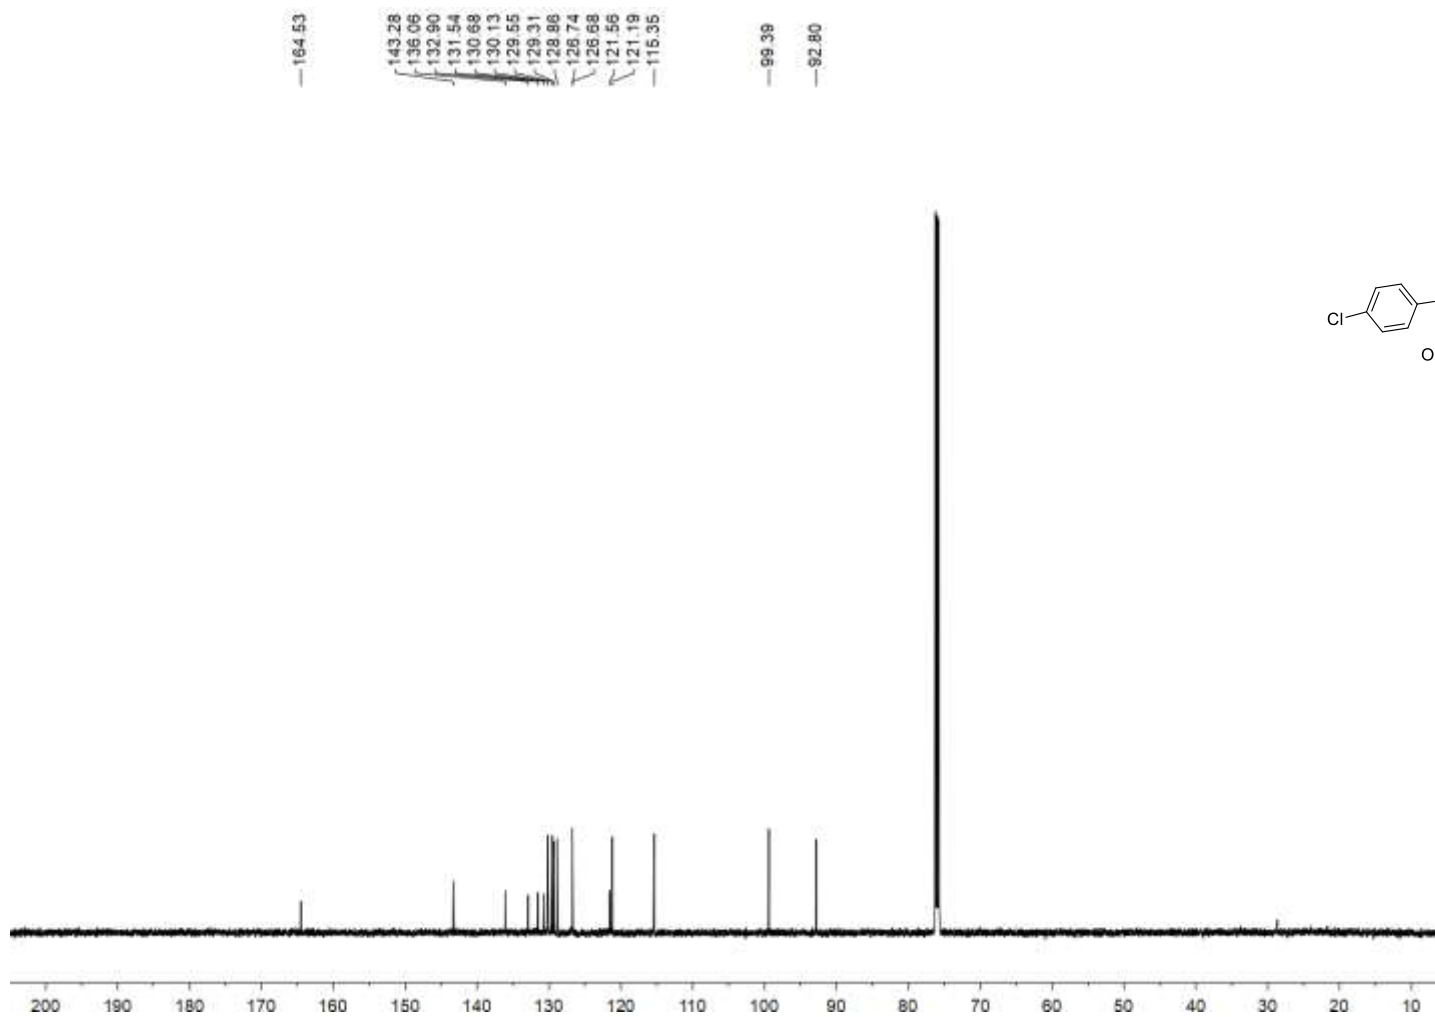

Figure S87.  $^{13}\text{C}$  NMR (150 MHz,  $\text{DMSO-}d_6$ ) spectra of compound 7e

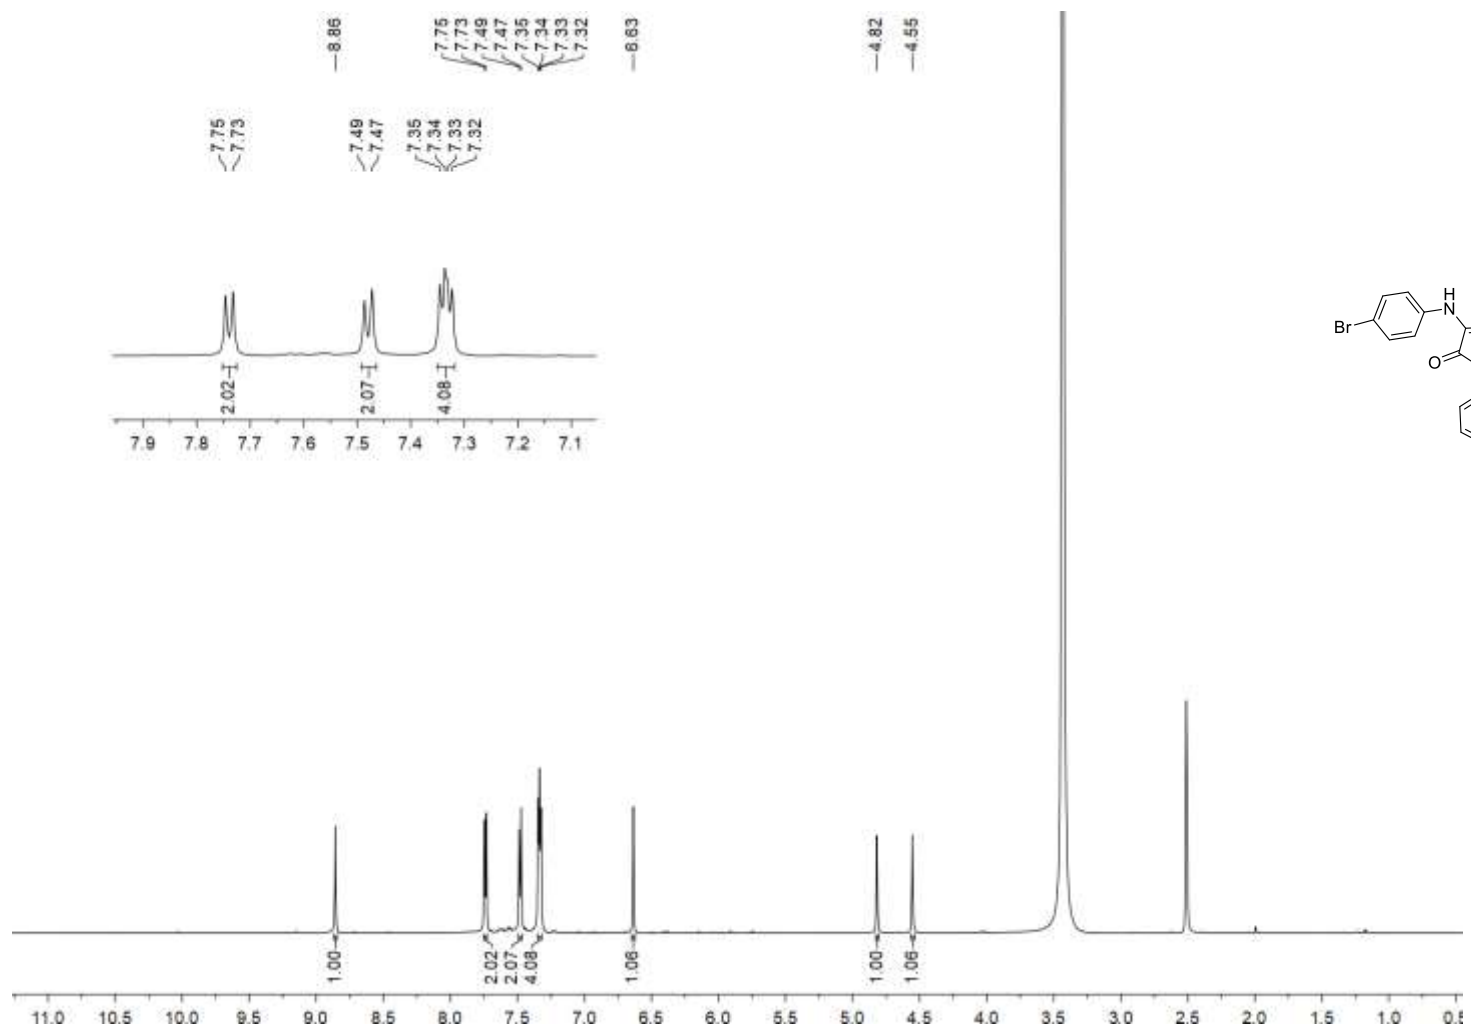

Figure S88.  $^1\text{H}$  NMR (600 MHz,  $\text{DMSO}-d_6$ ) spectra of compound **7f**



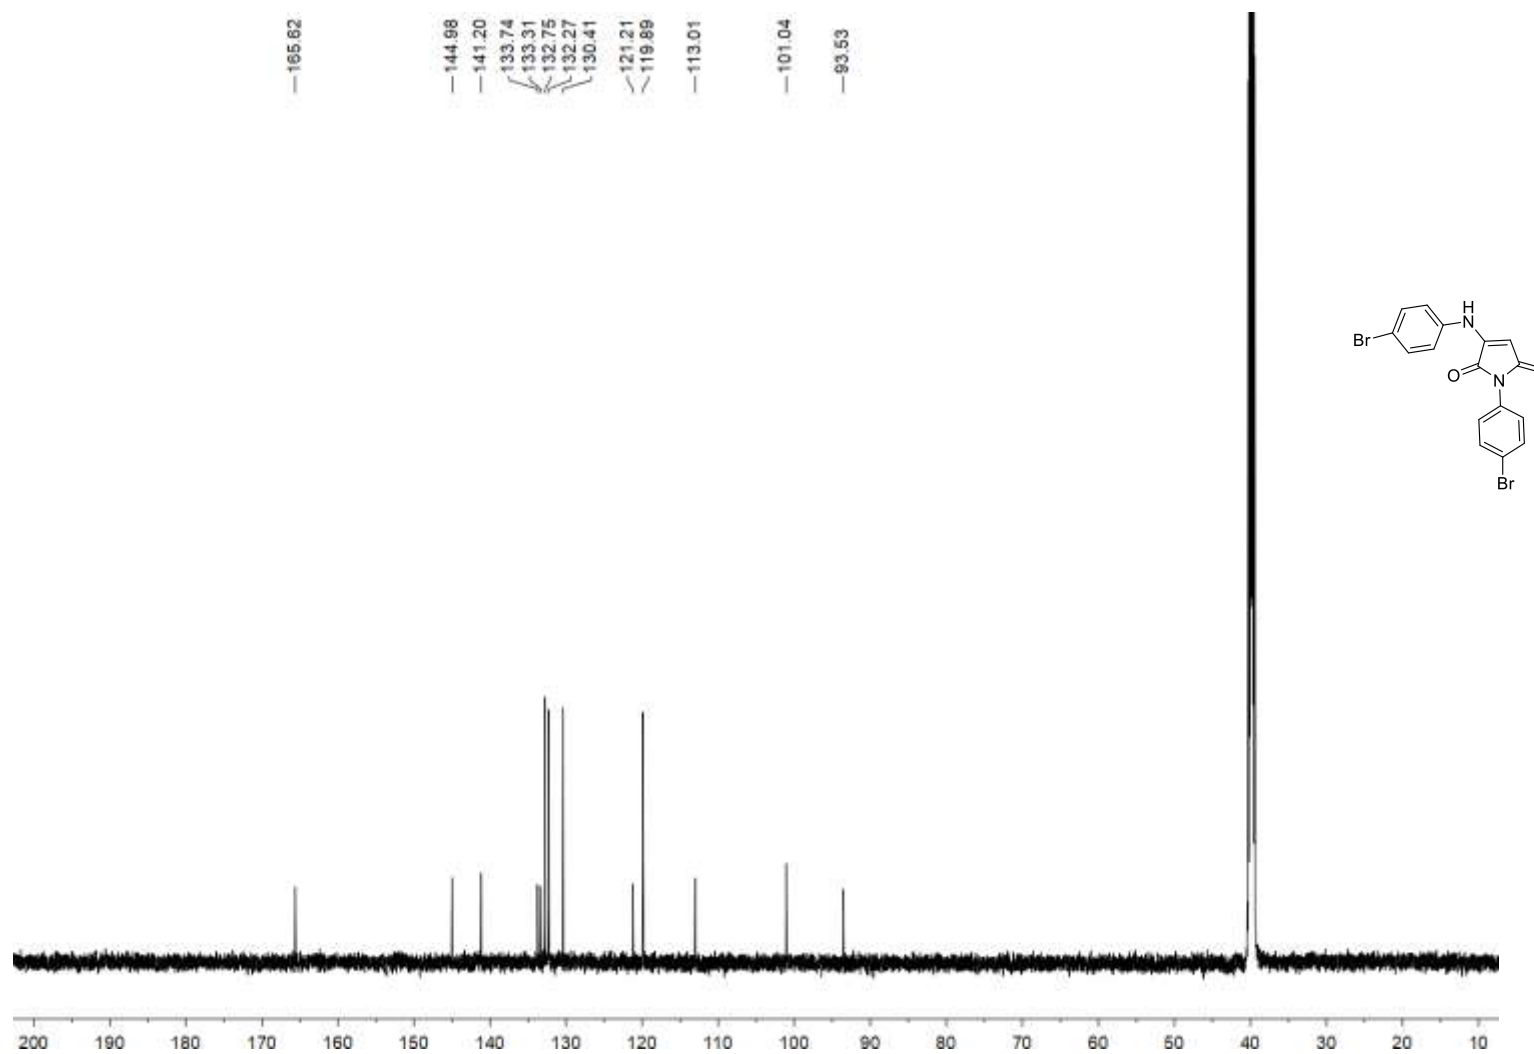

Figure S89.  $^{13}\text{C}$  NMR (150 MHz,  $\text{DMSO-}d_6$ ) spectra of compound 7f

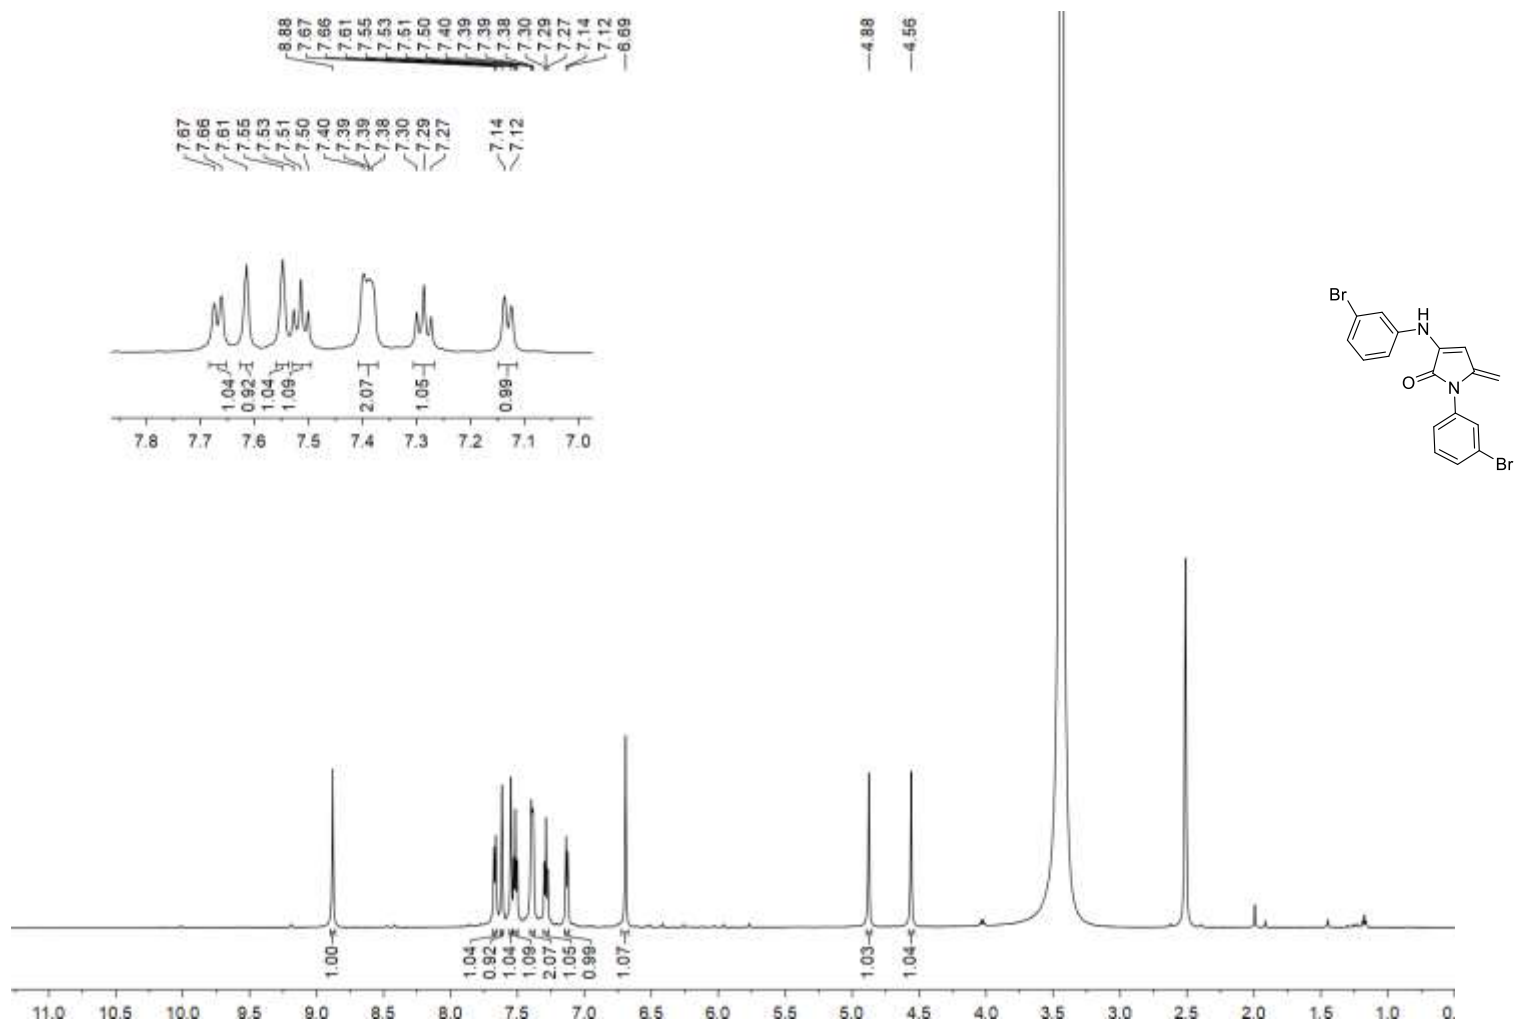

**Figure S90.**  $^1\text{H}$  NMR (600 MHz,  $\text{DMSO-}d_6$ ) spectra of compound **7g**

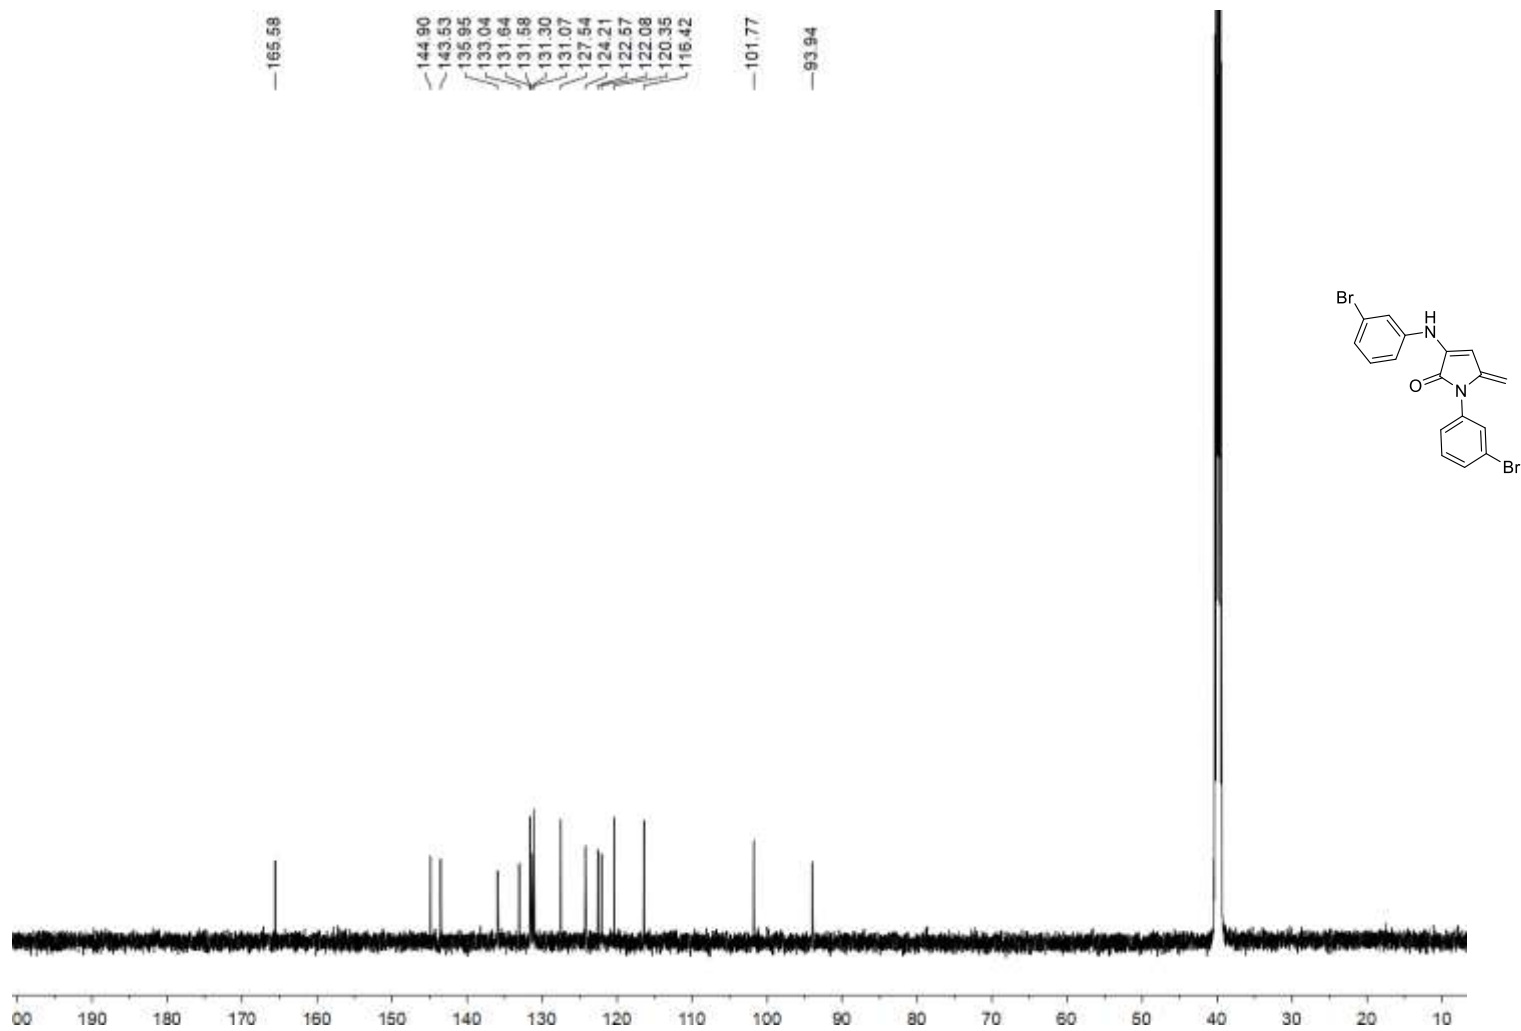

Figure S91.  $^{13}\text{C}$  NMR (150 MHz,  $\text{DMSO-}d_6$ ) spectra of compound 7g

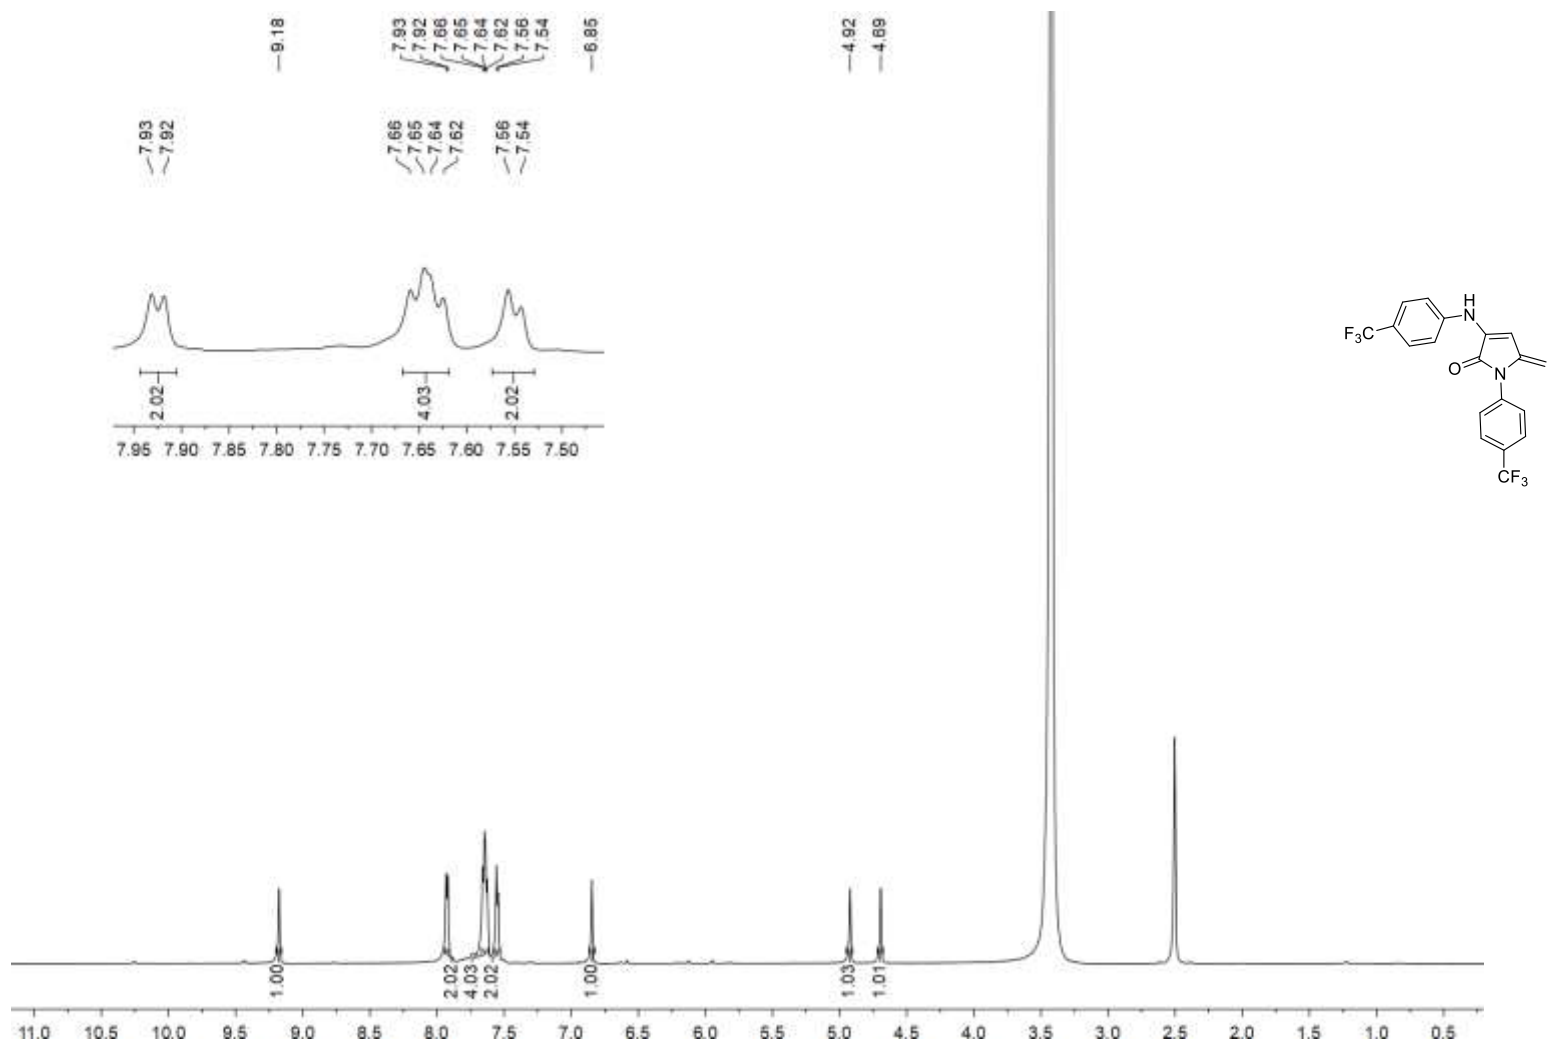

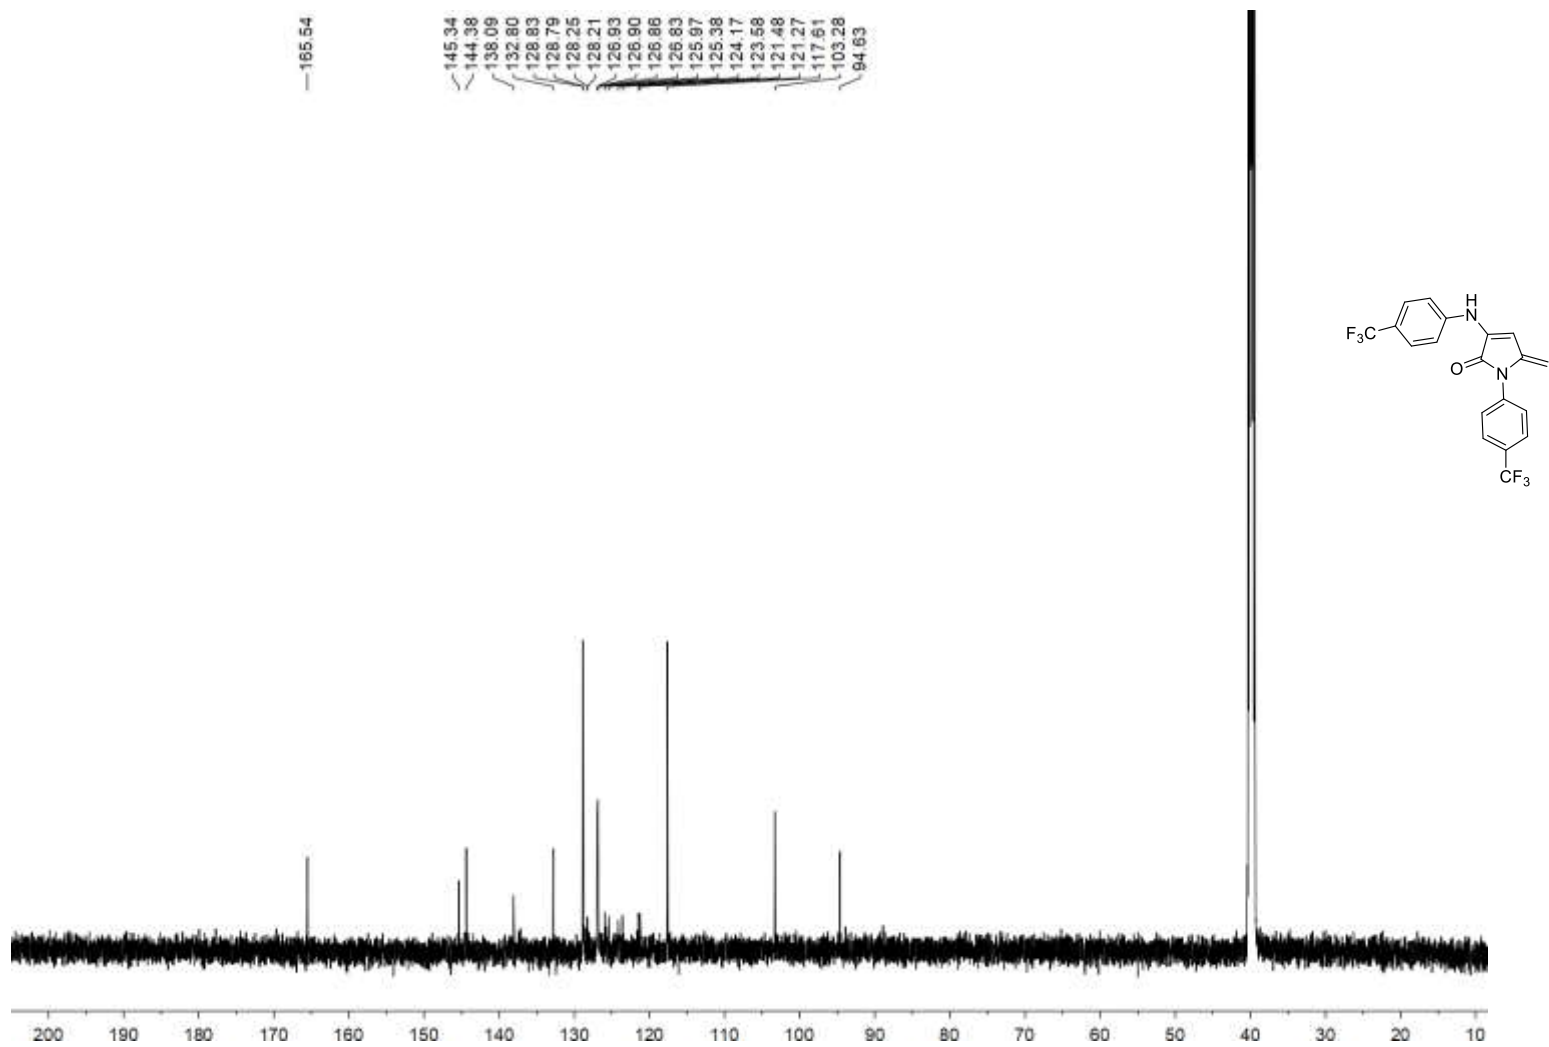

Figure S93. <sup>13</sup>C NMR (150 MHz, DMSO-*d*<sub>6</sub>) spectra of compound 7h

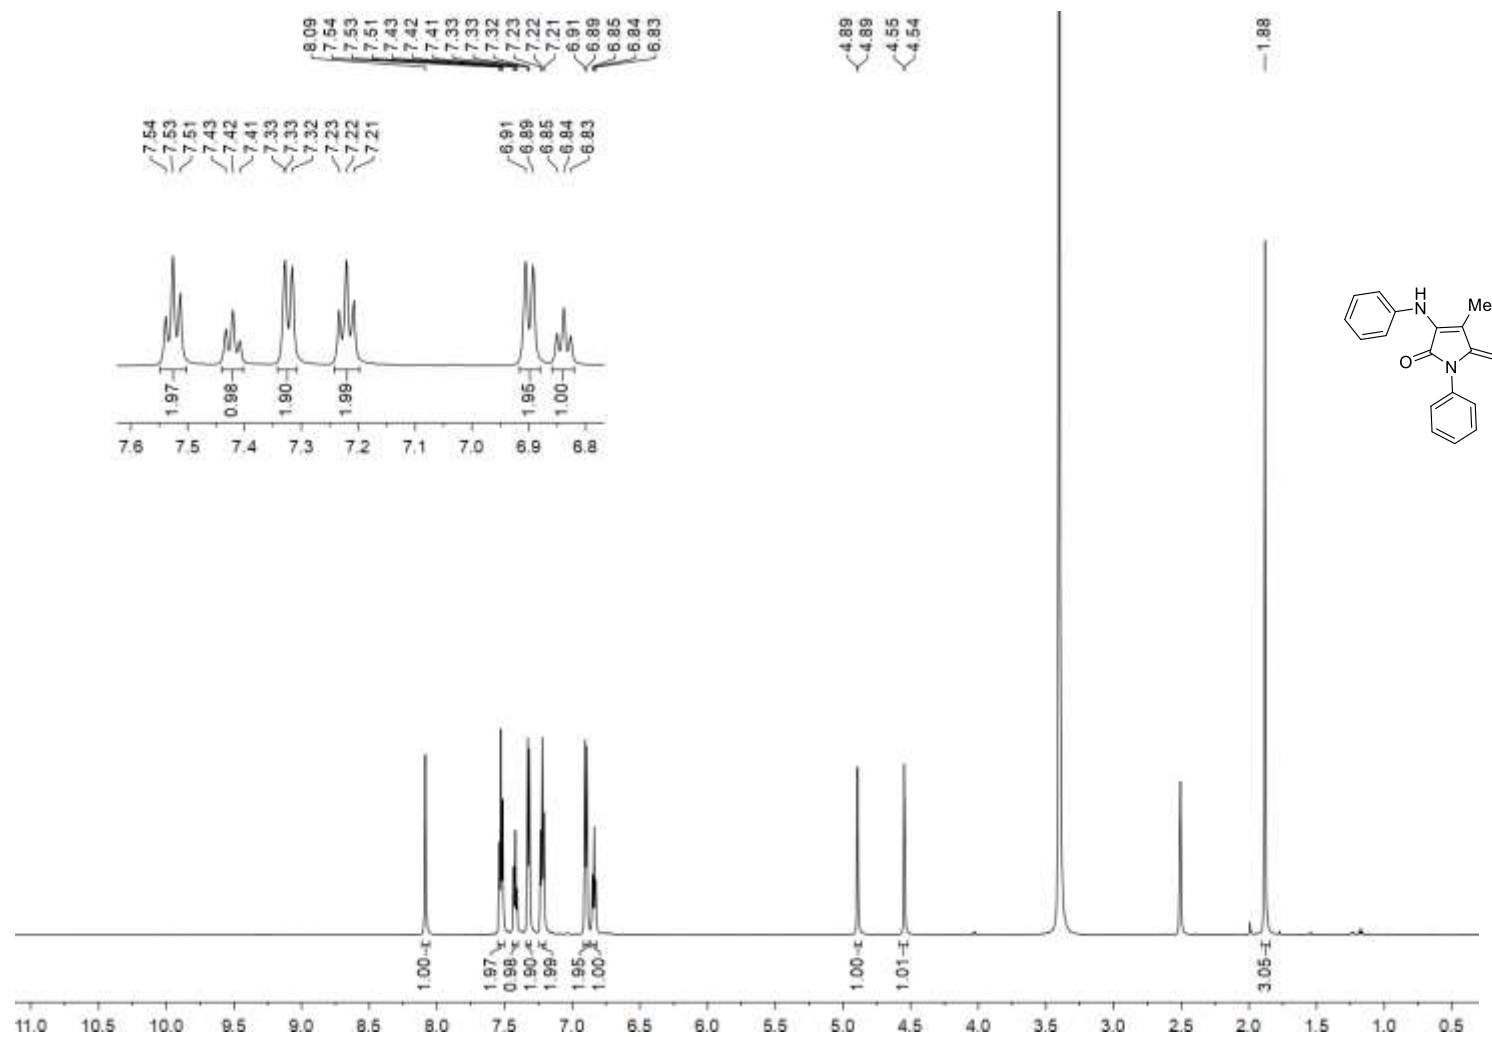

Figure S94. <sup>1</sup>H NMR (600 MHz, DMSO-*d*<sub>6</sub>) spectra of compound **7i**

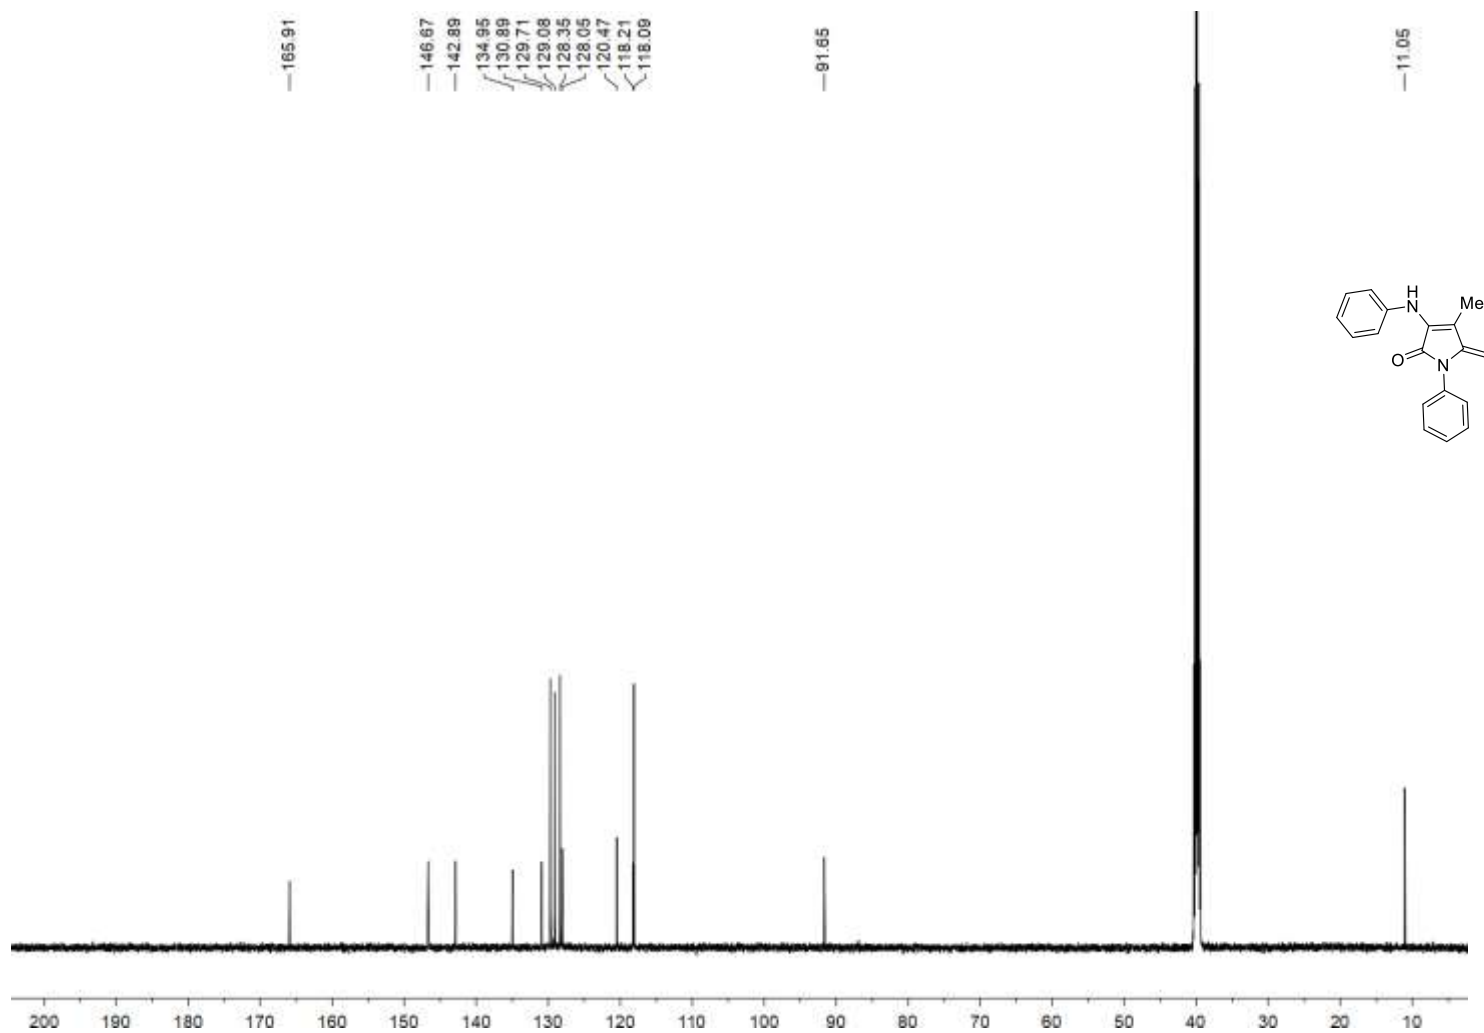

**Figure S95.**  $^{13}\text{C}$  NMR (150 MHz,  $\text{DMSO-}d_6$ ) spectra of compound **7i**

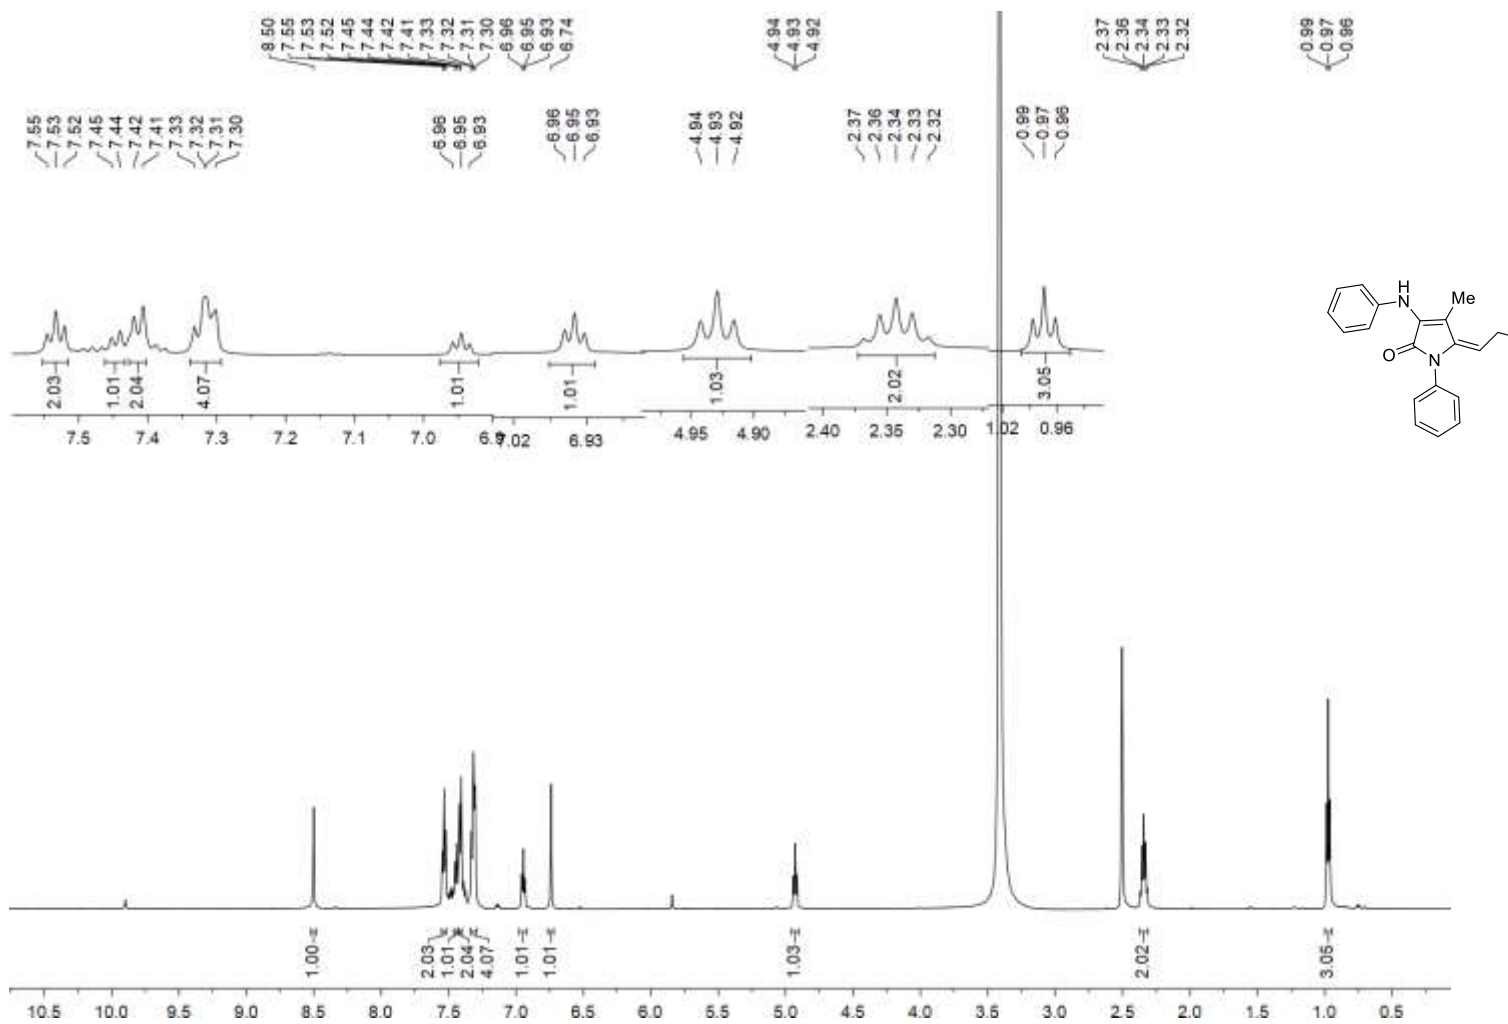

Figure S96. <sup>1</sup>H NMR (600 MHz, DMSO-*d*<sub>6</sub>) spectra of compound 7j



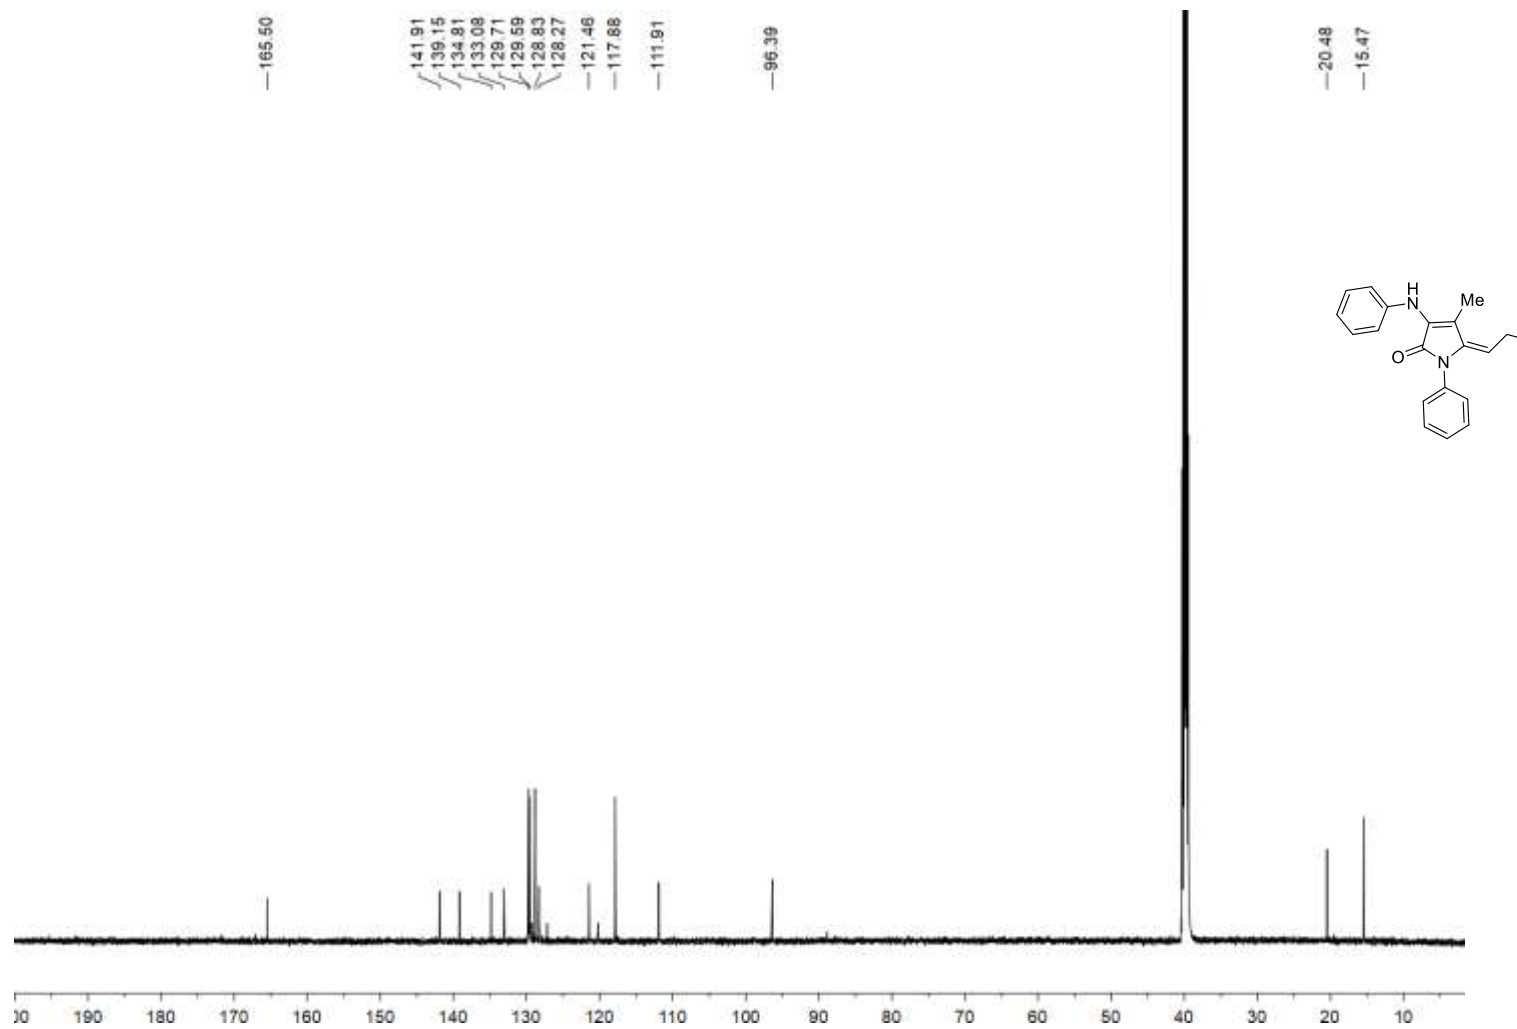

Figure S97.  $^{13}\text{C}$  NMR (150 MHz,  $\text{DMSO-}d_6$ ) spectra of compound 7j

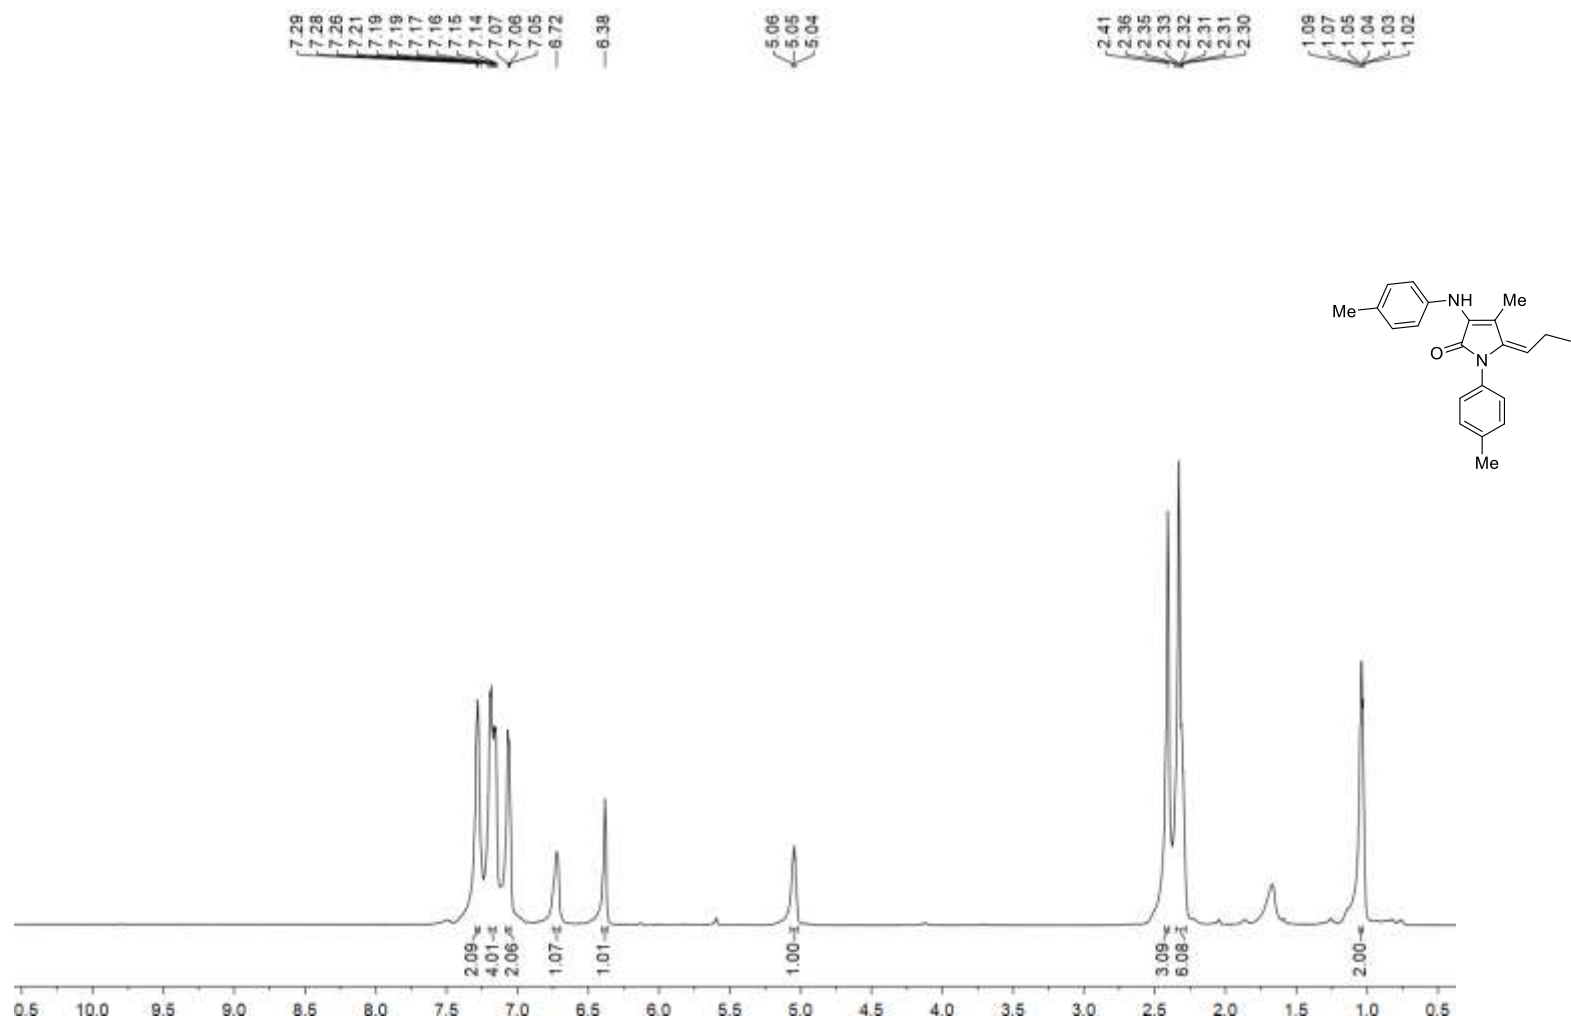

**Figure S98.** <sup>1</sup>H NMR (600 MHz, CDCl<sub>3</sub>) spectra of compound **7k**

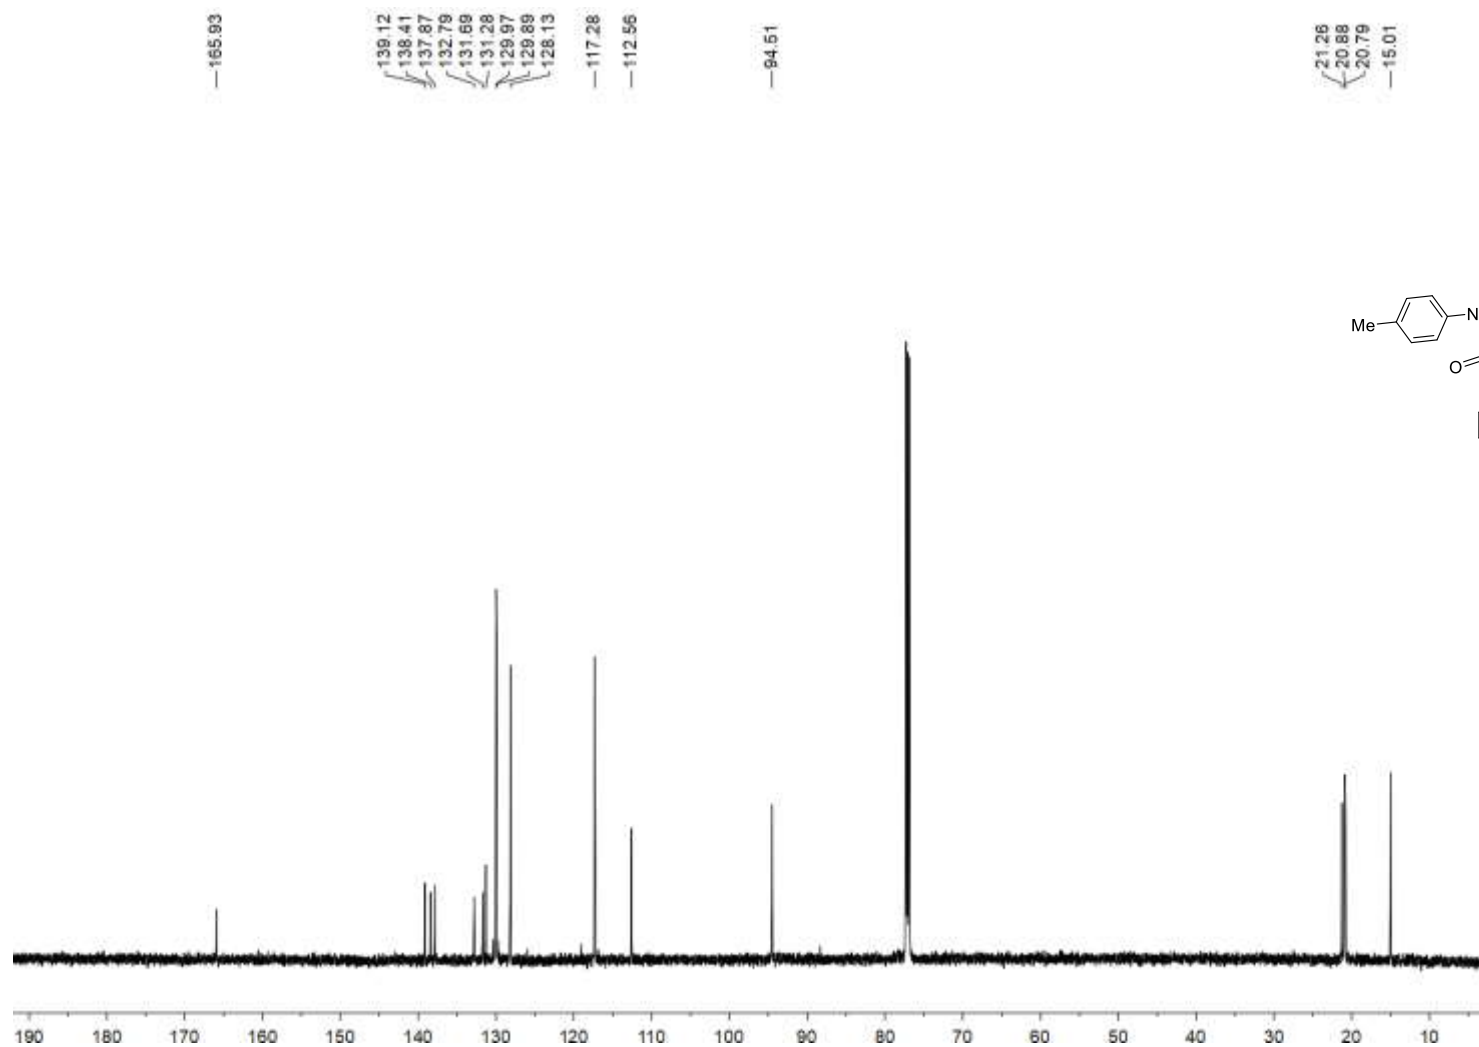

Figure S99. <sup>13</sup>C NMR (150 MHz, CDCl<sub>3</sub>) spectra of compound **7k**

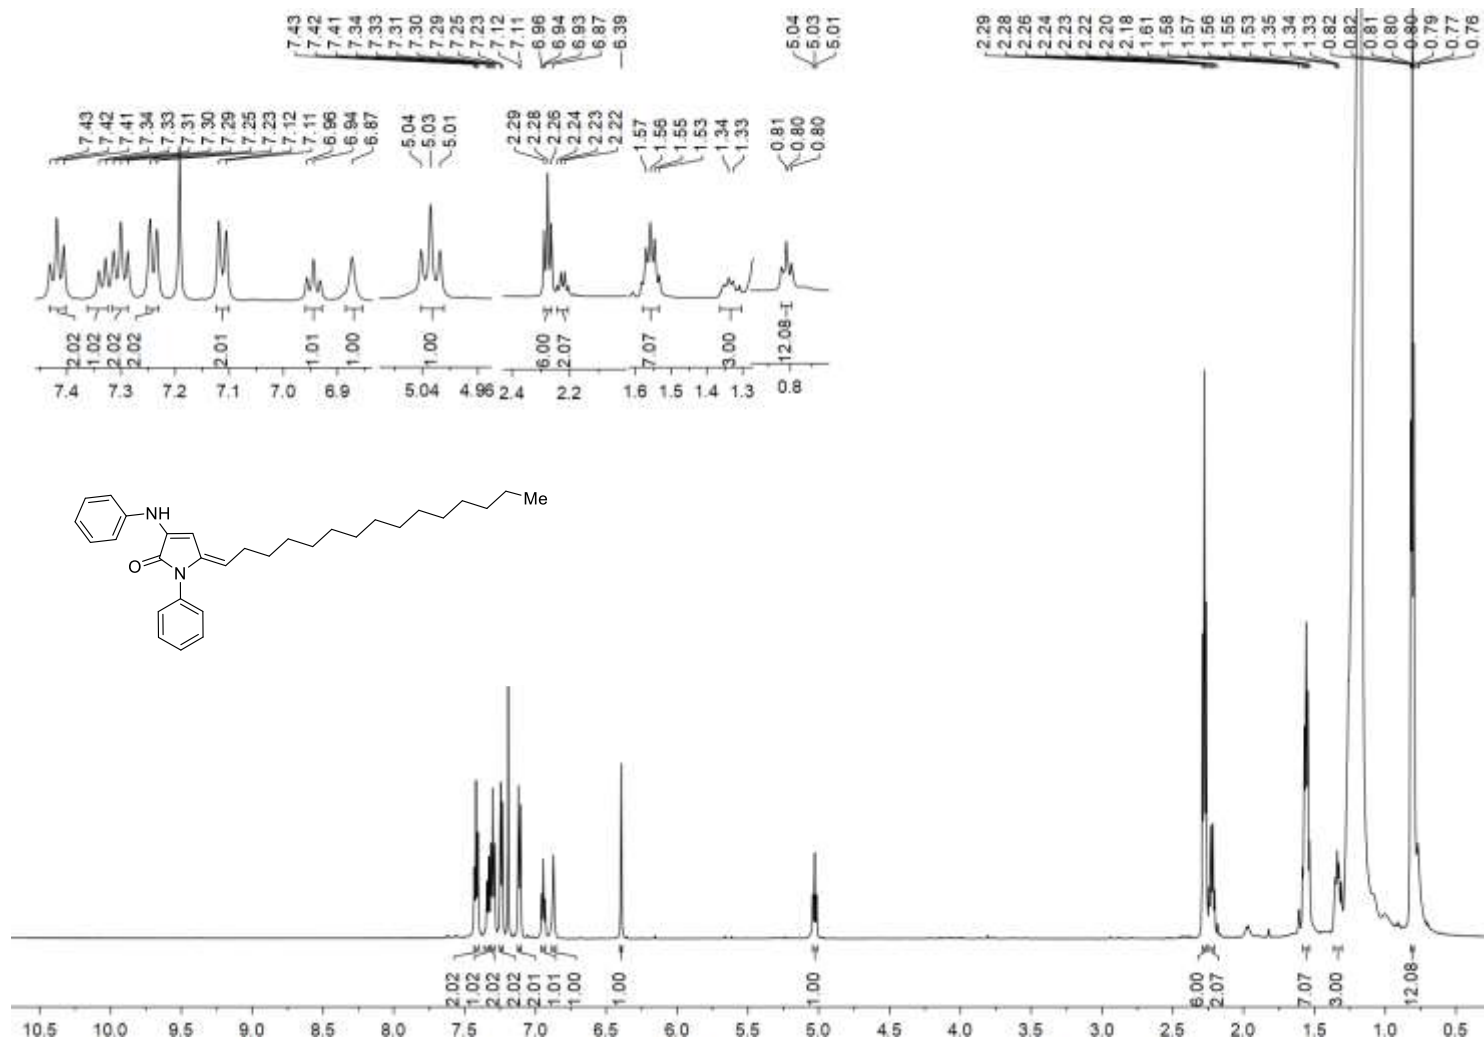

Figure S100. <sup>1</sup>H NMR (600 MHz, CDCl<sub>3</sub>) spectra of compound 71

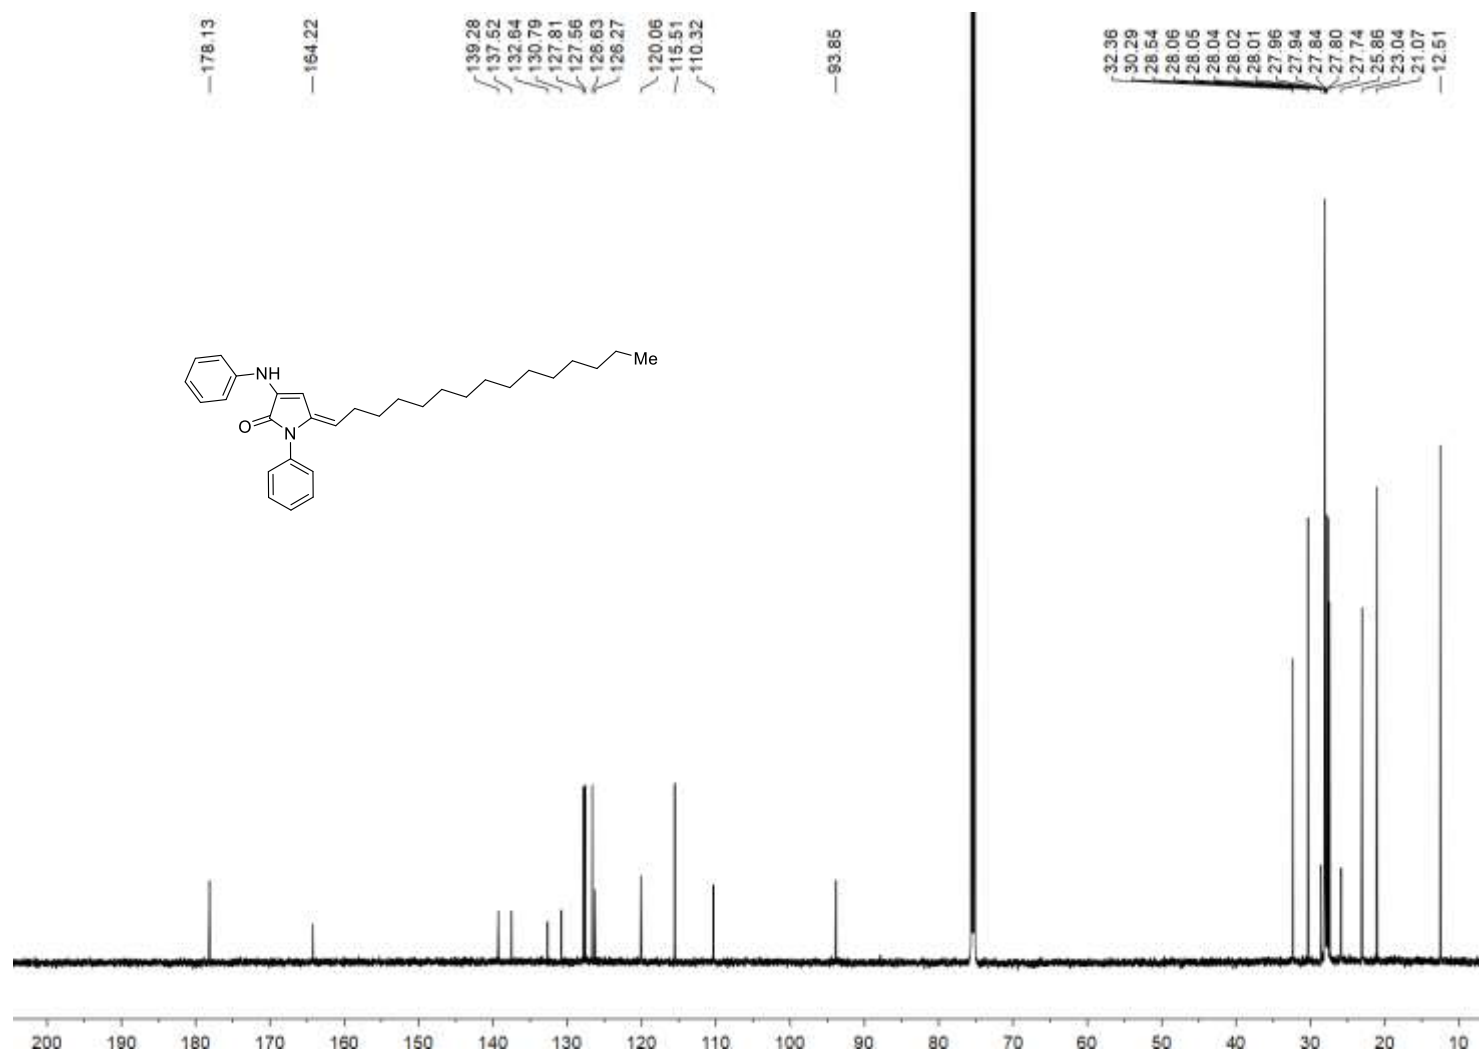

Figure S101. <sup>13</sup>C NMR (150 MHz, CDCl<sub>3</sub>) spectra of compound 71

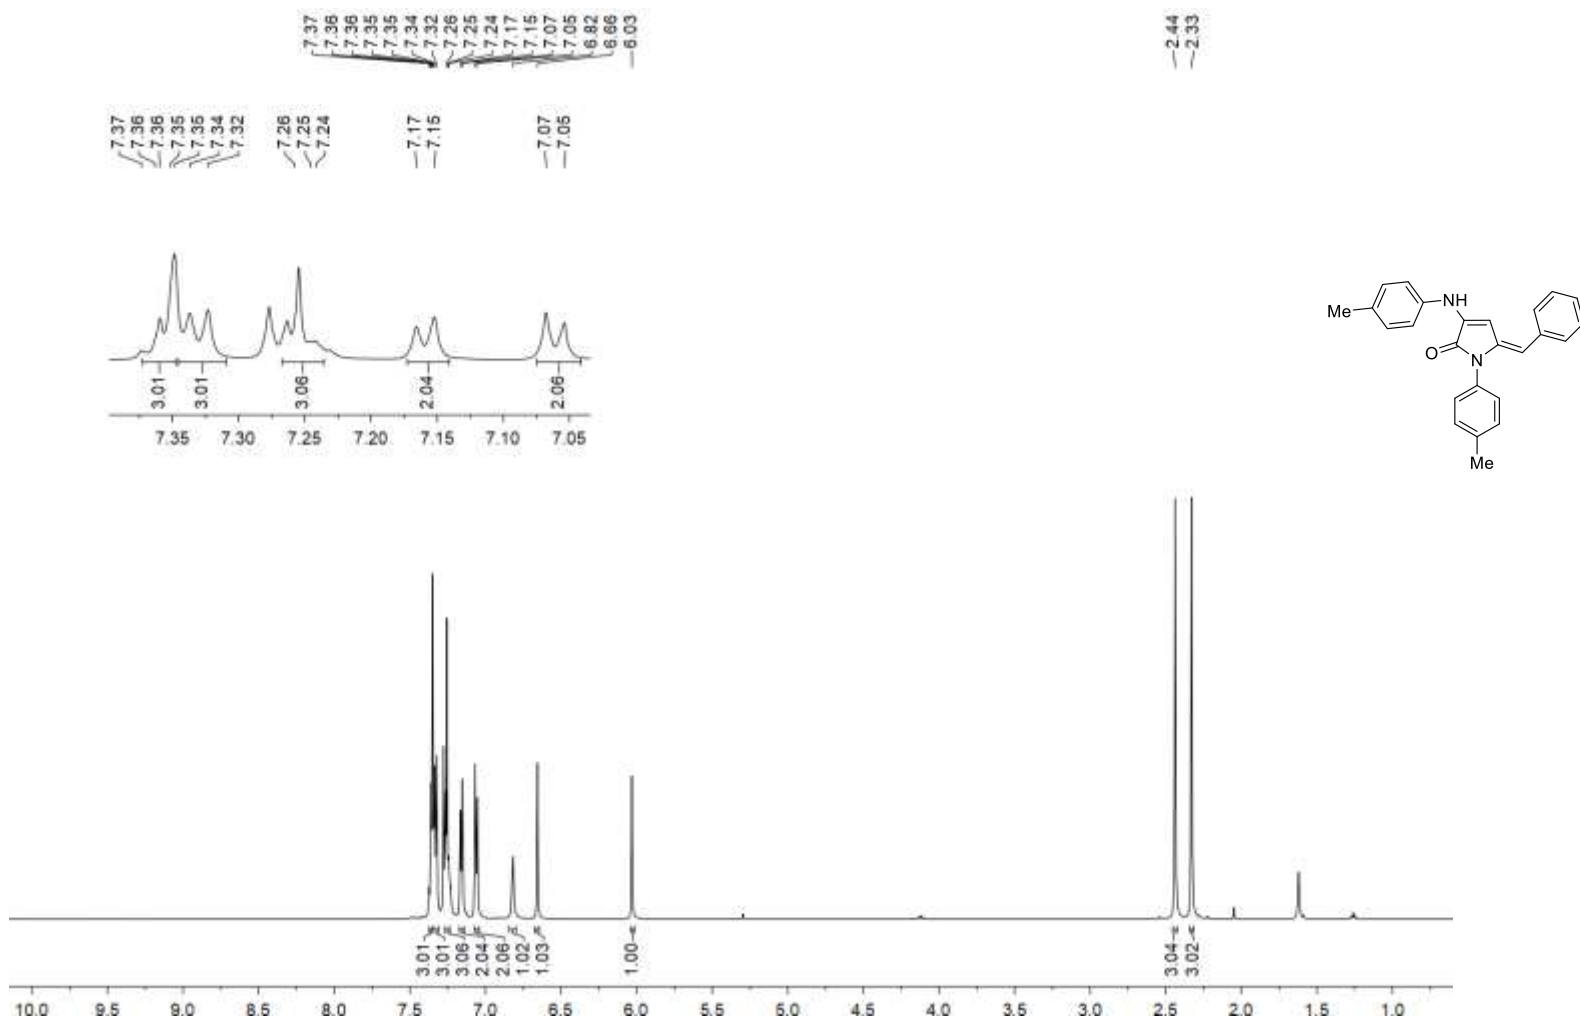

Figure S102. <sup>1</sup>H NMR (600 MHz, CDCl<sub>3</sub>) spectra of compound **7m**

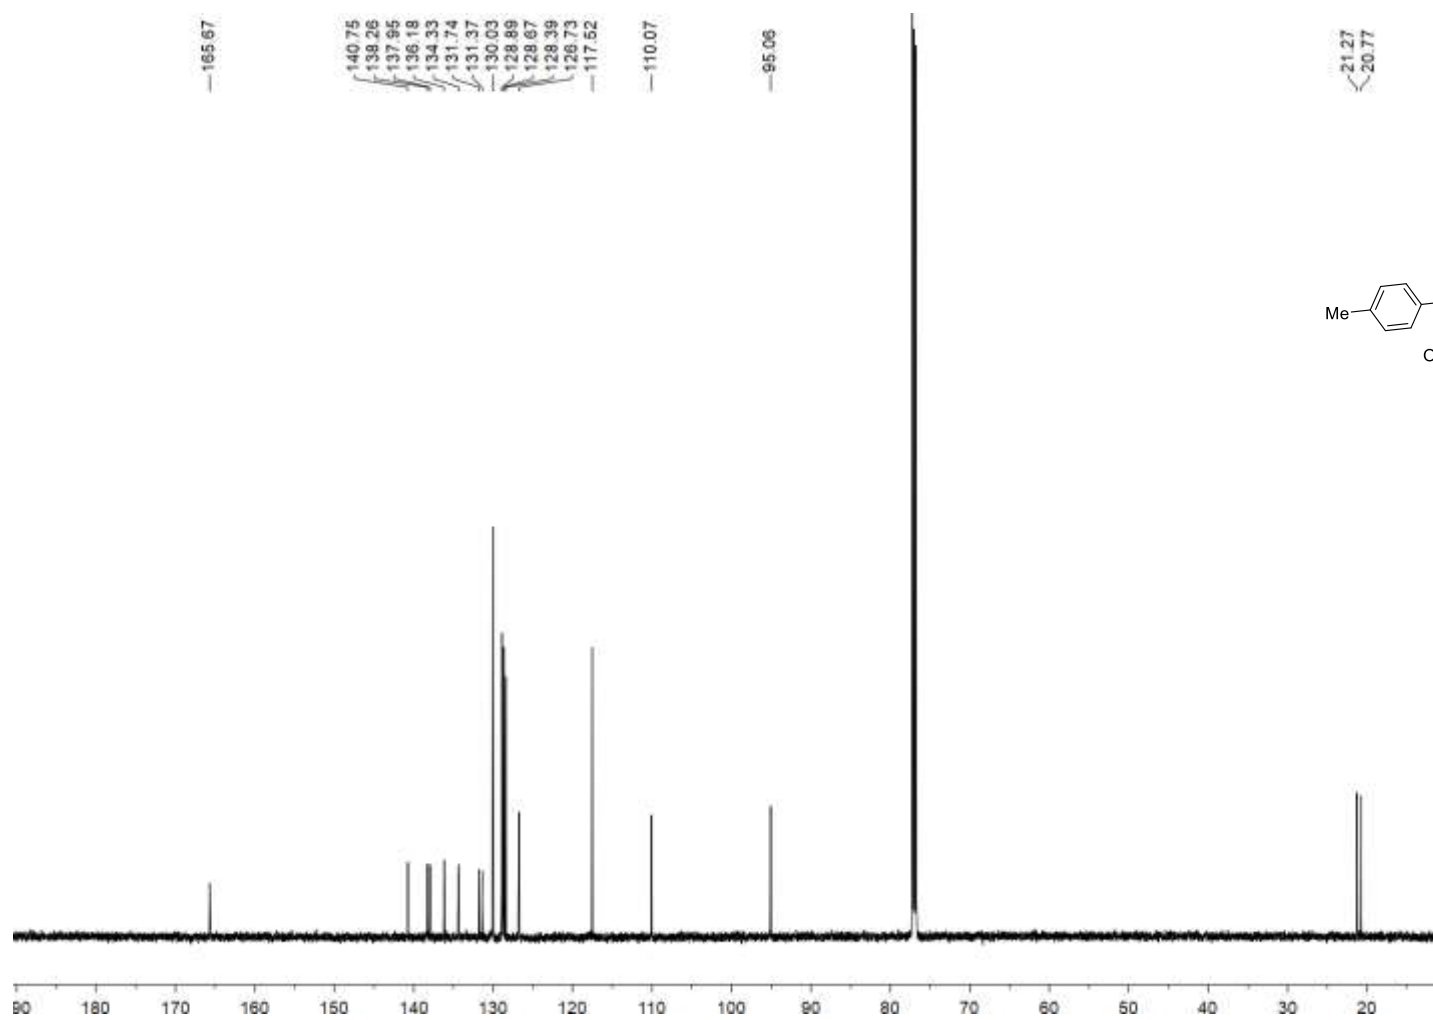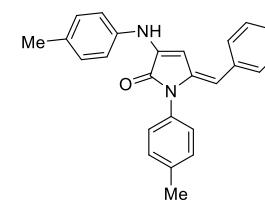

Figure S103.  $^{13}\text{C}$  NMR (150 MHz,  $\text{CDCl}_3$ ) spectra of compound 7m

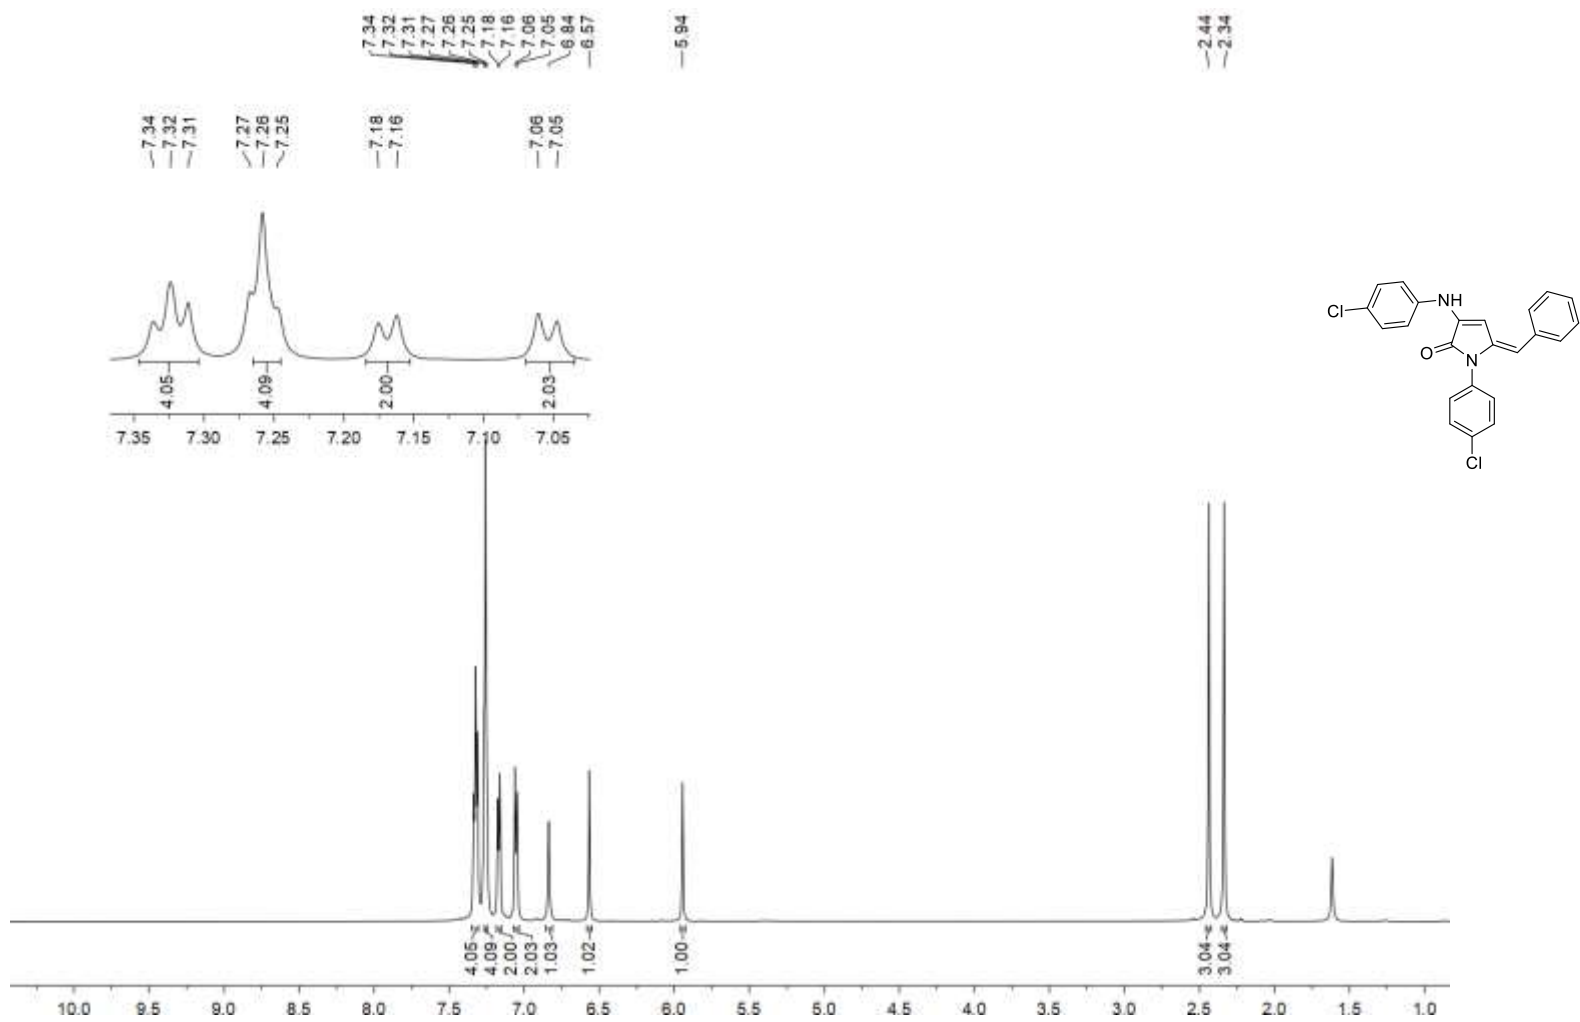

**Figure S104.**  $^1\text{H}$  NMR (600 MHz,  $\text{CDCl}_3$ ) spectra of compound **7n**



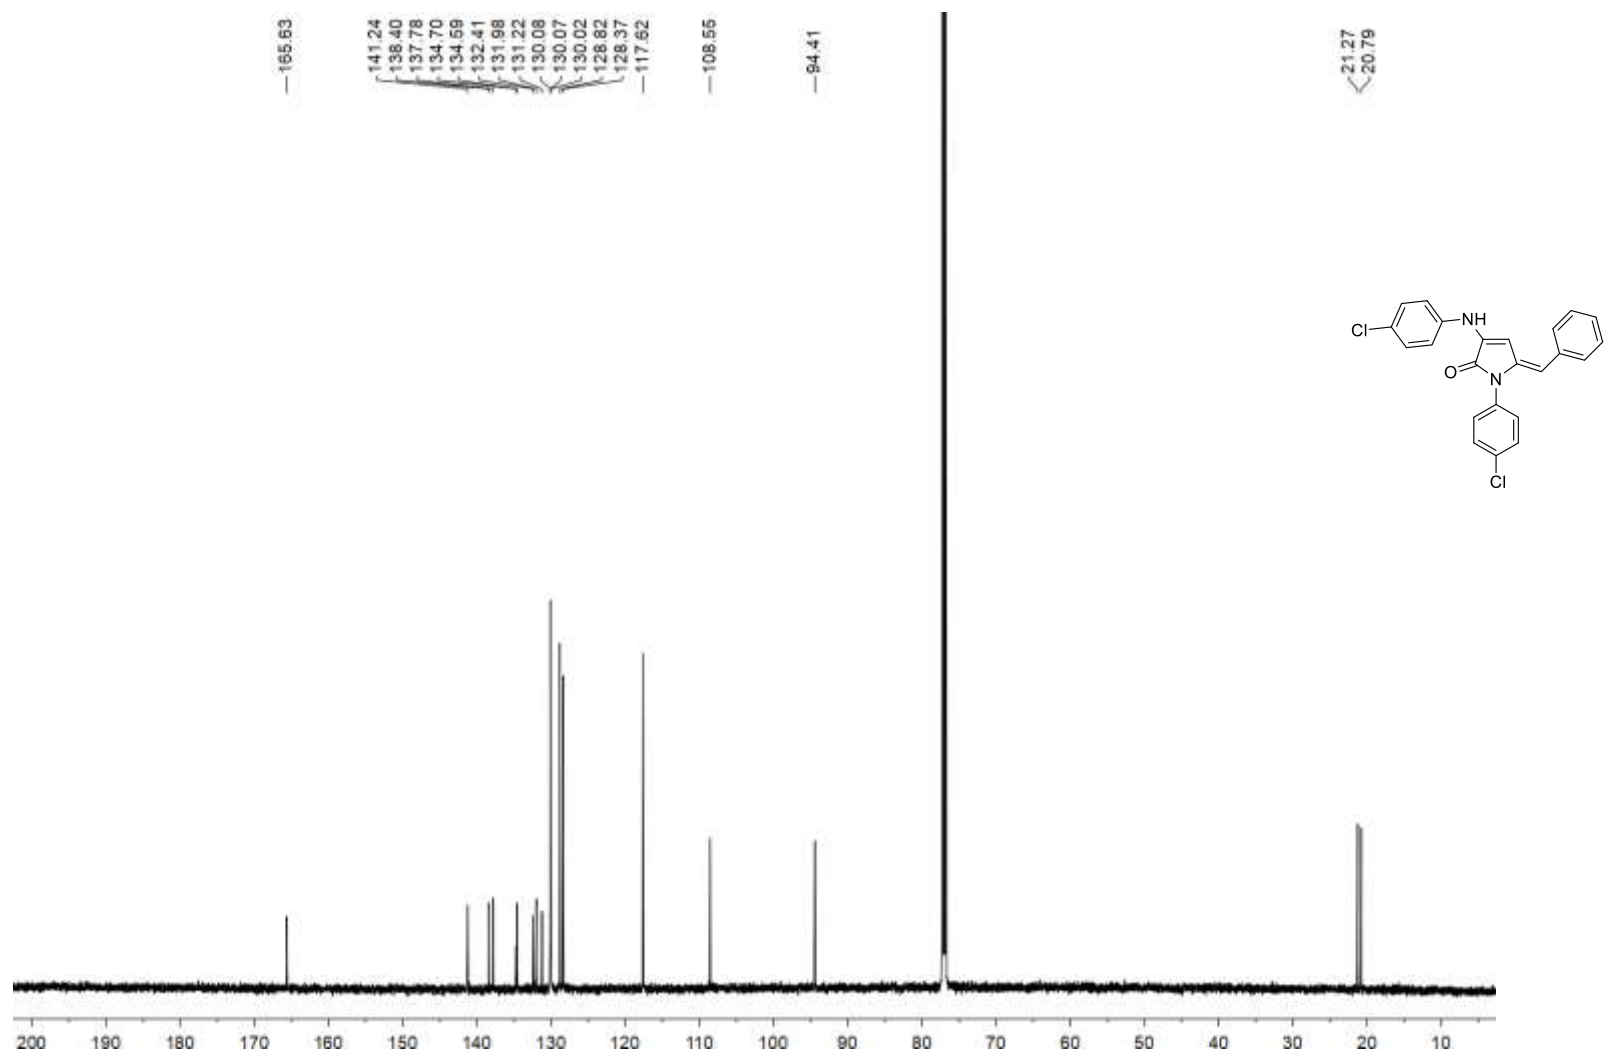

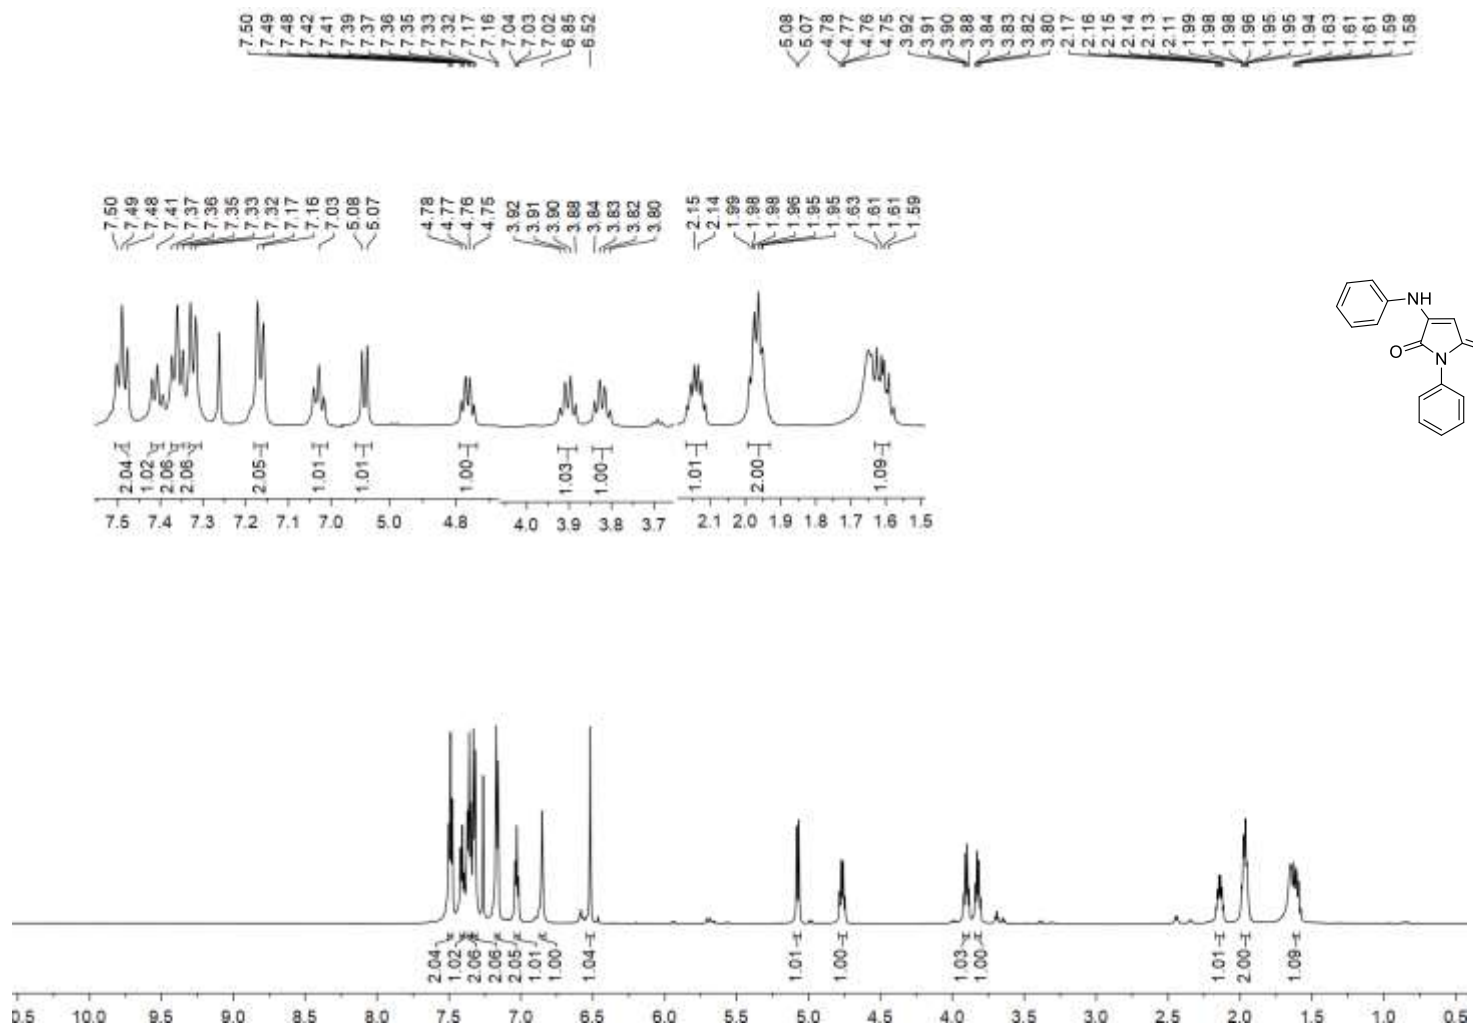

Figure S106.  $^1\text{H}$  NMR (600 MHz,  $\text{CDCl}_3$ ) spectra of compound **8a**

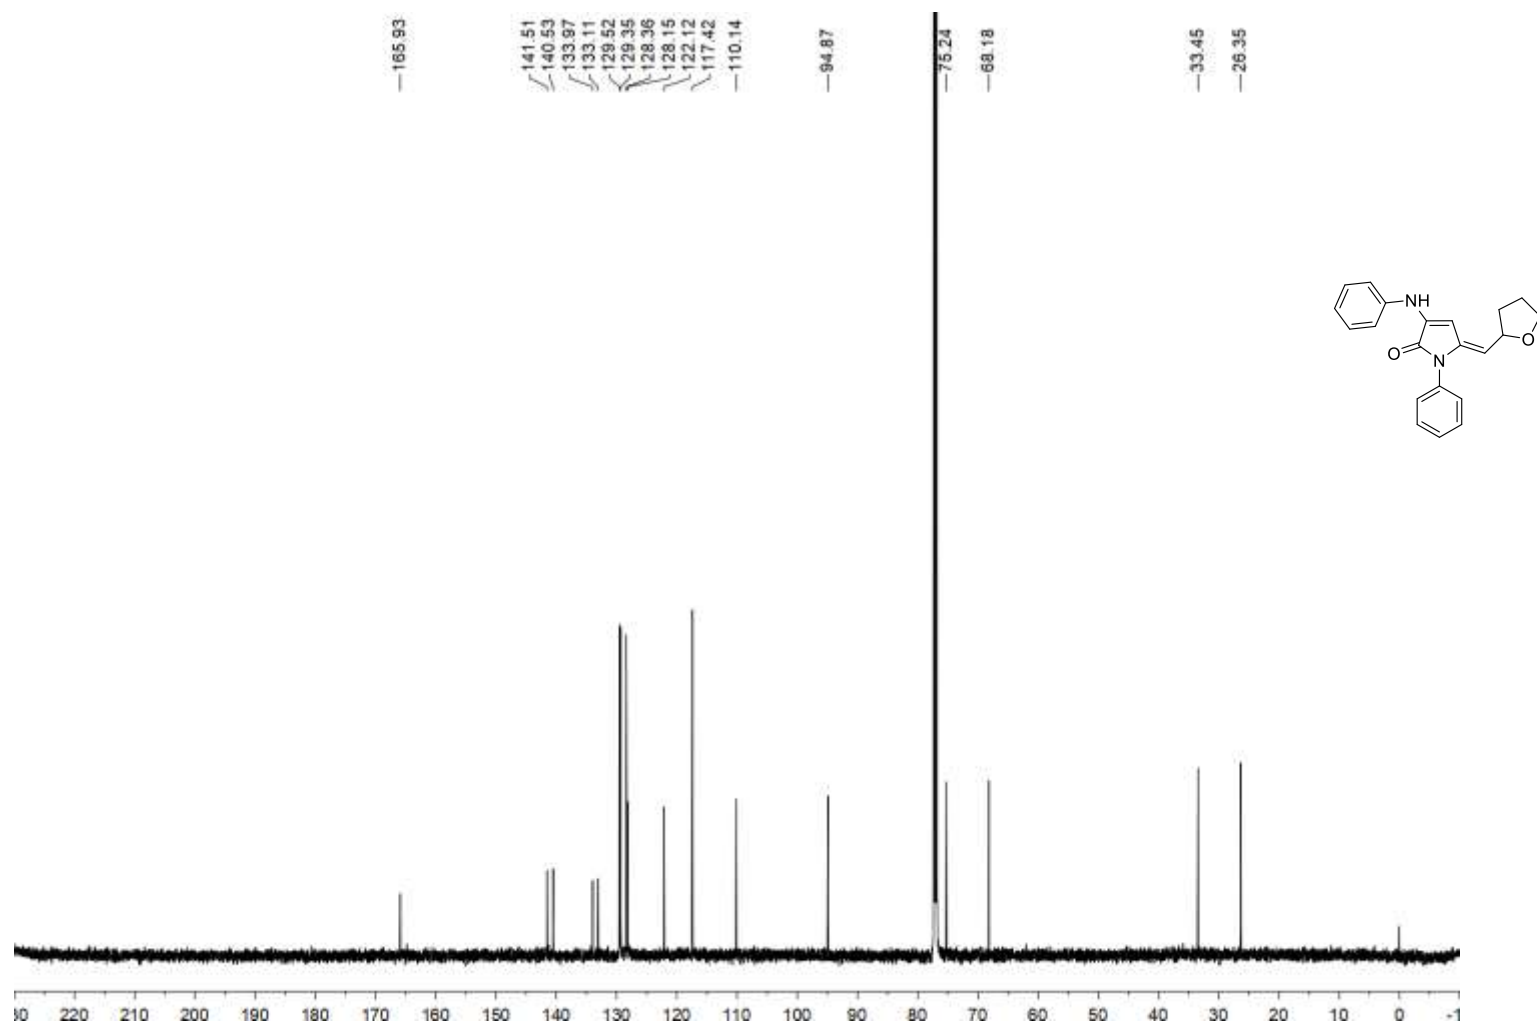

Figure S107. <sup>13</sup>C NMR (150 MHz, CDCl<sub>3</sub>) spectra of compound **8a**

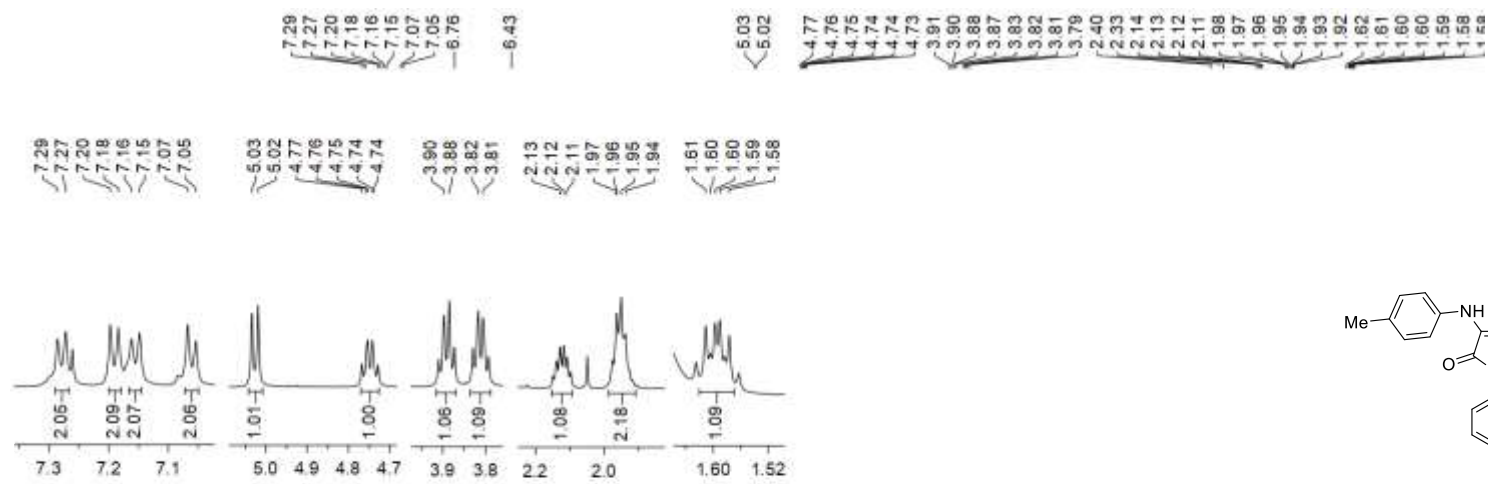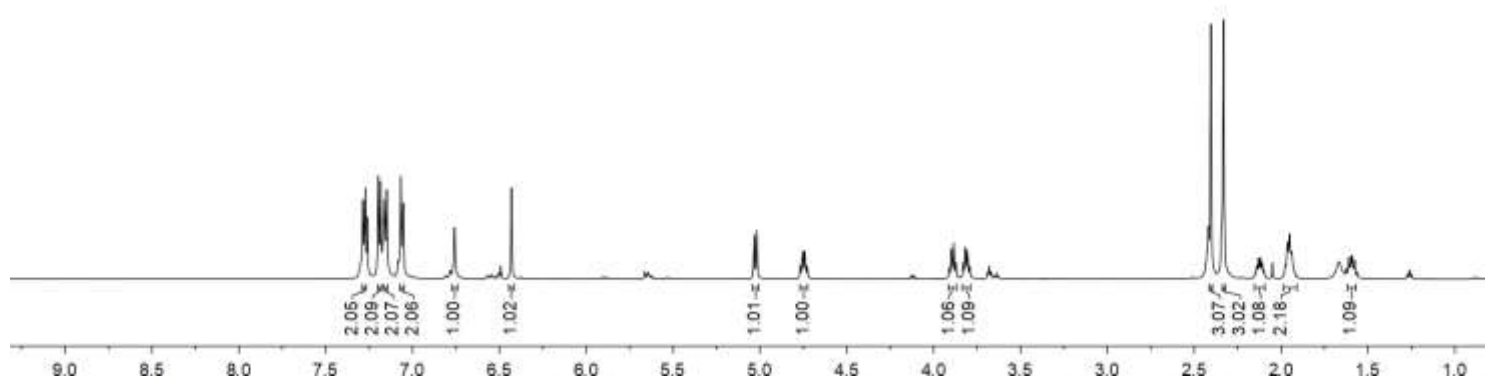

Figure S108. <sup>1</sup>H NMR (600 MHz, CDCl<sub>3</sub>) spectra of compound **8b**

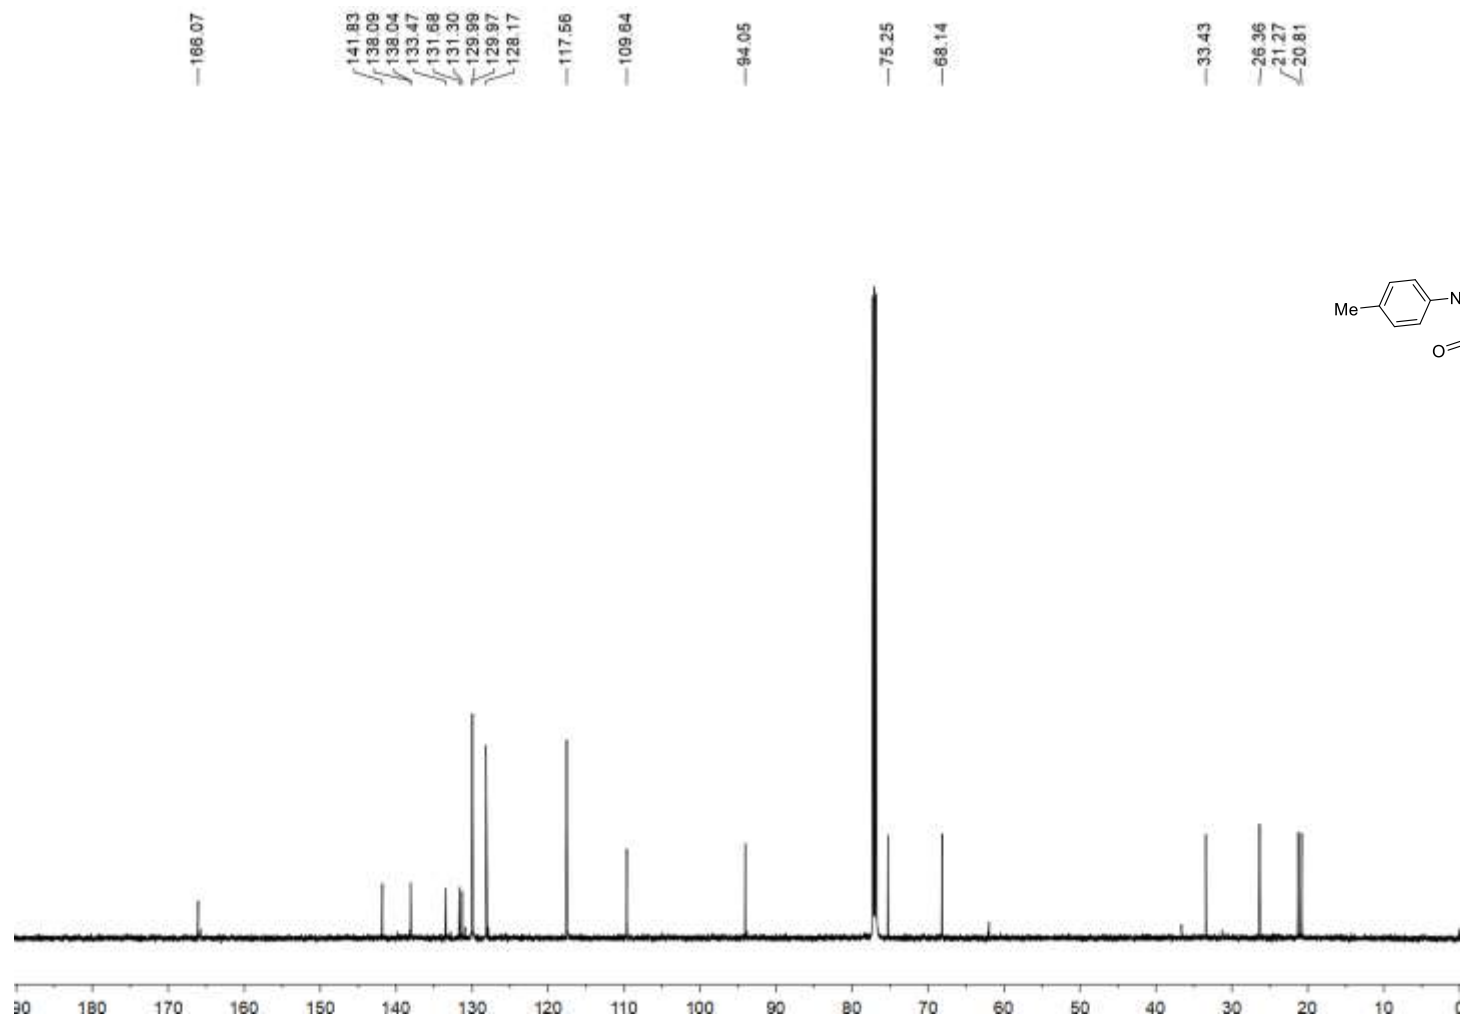

**Figure S109.**  $^{13}\text{C}$  NMR (150 MHz,  $\text{CDCl}_3$ ) spectra of compound **8b**

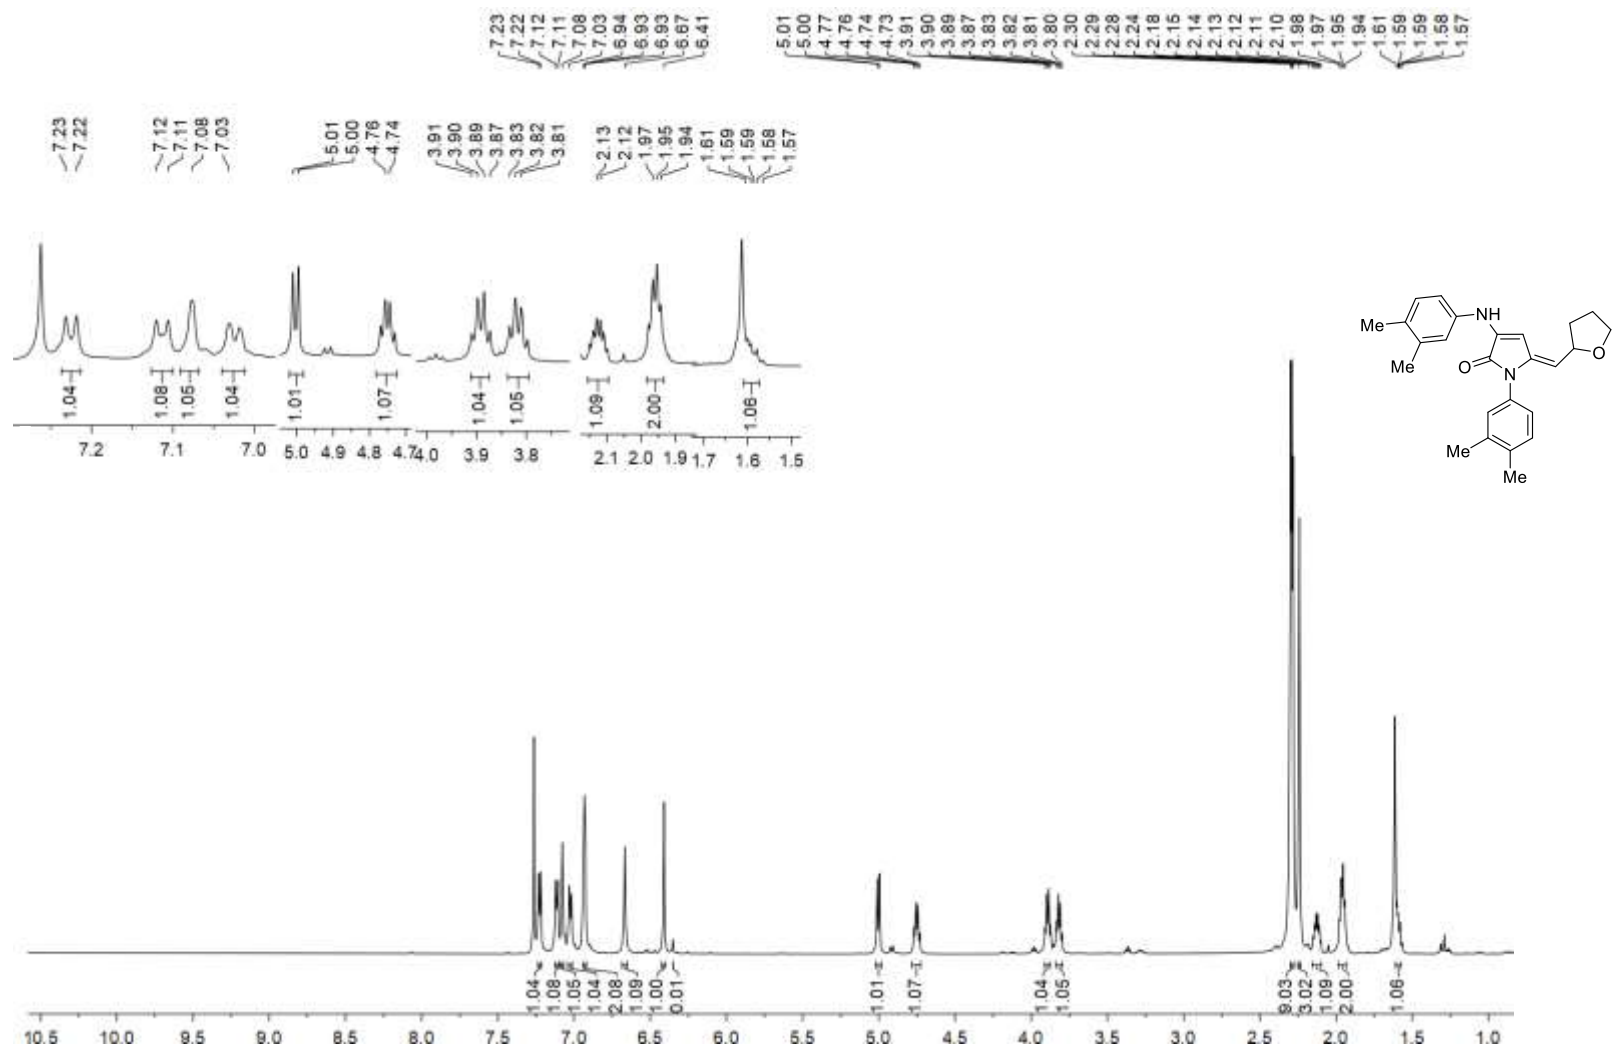

Figure S110. <sup>1</sup>H NMR (600 MHz, CDCl<sub>3</sub>) spectra of compound **8c**

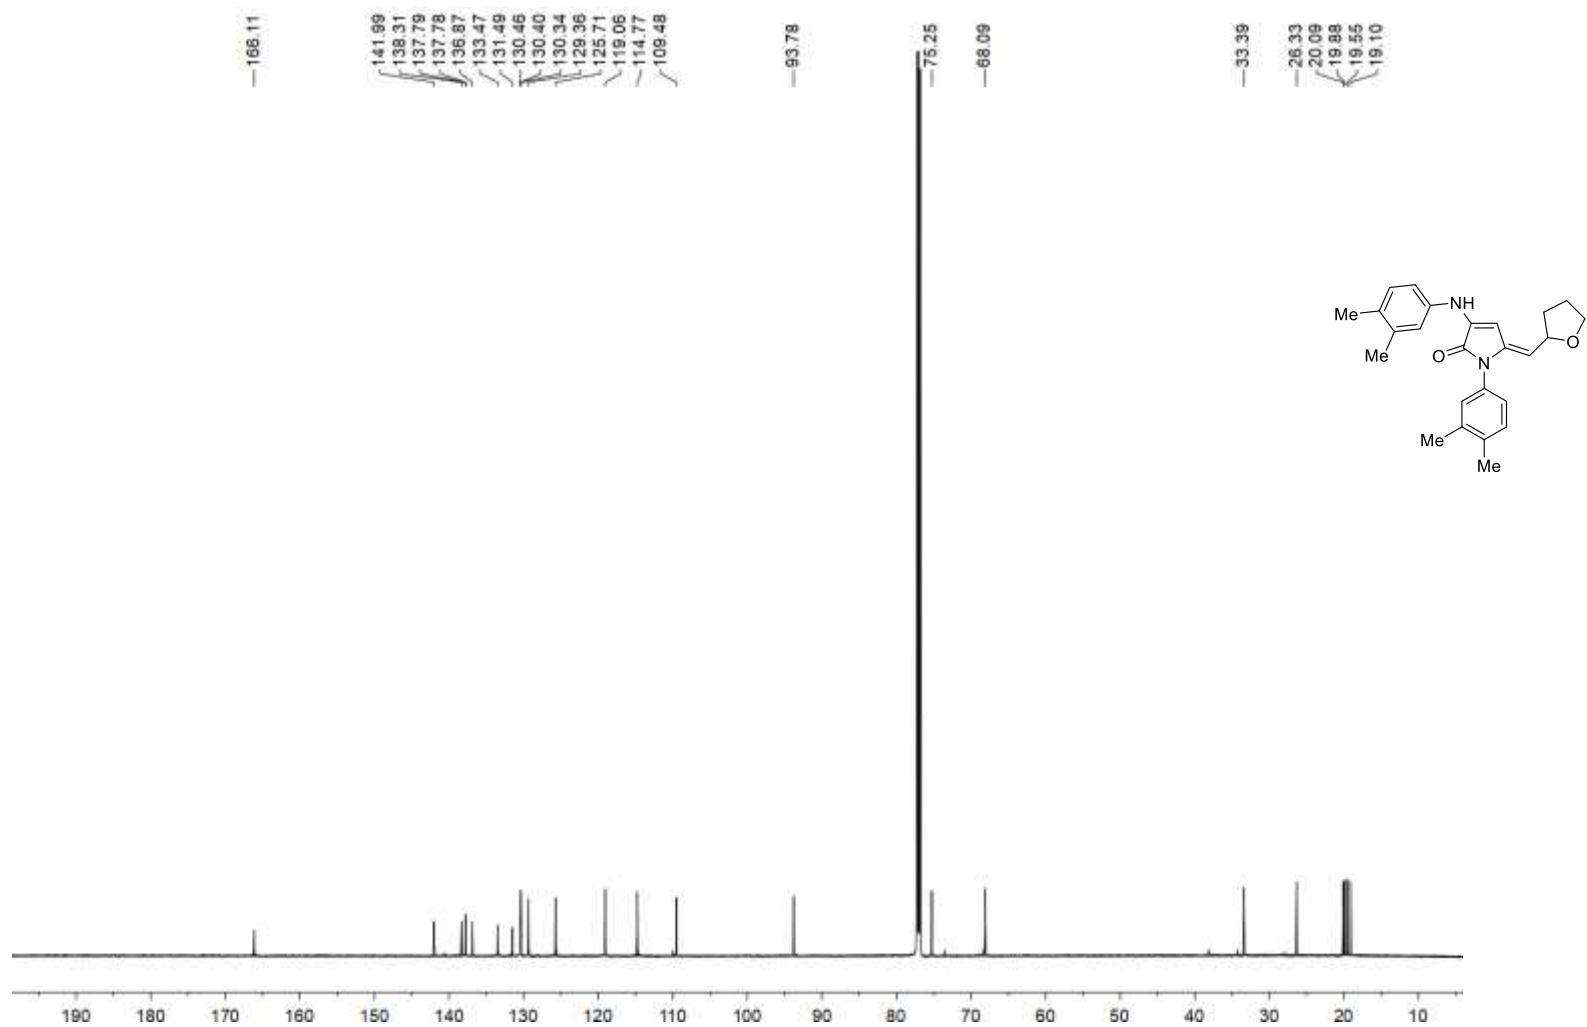

**Figure S111.**  $^{13}\text{C}$  NMR (150 MHz,  $\text{CDCl}_3$ ) spectra of compound **8c**

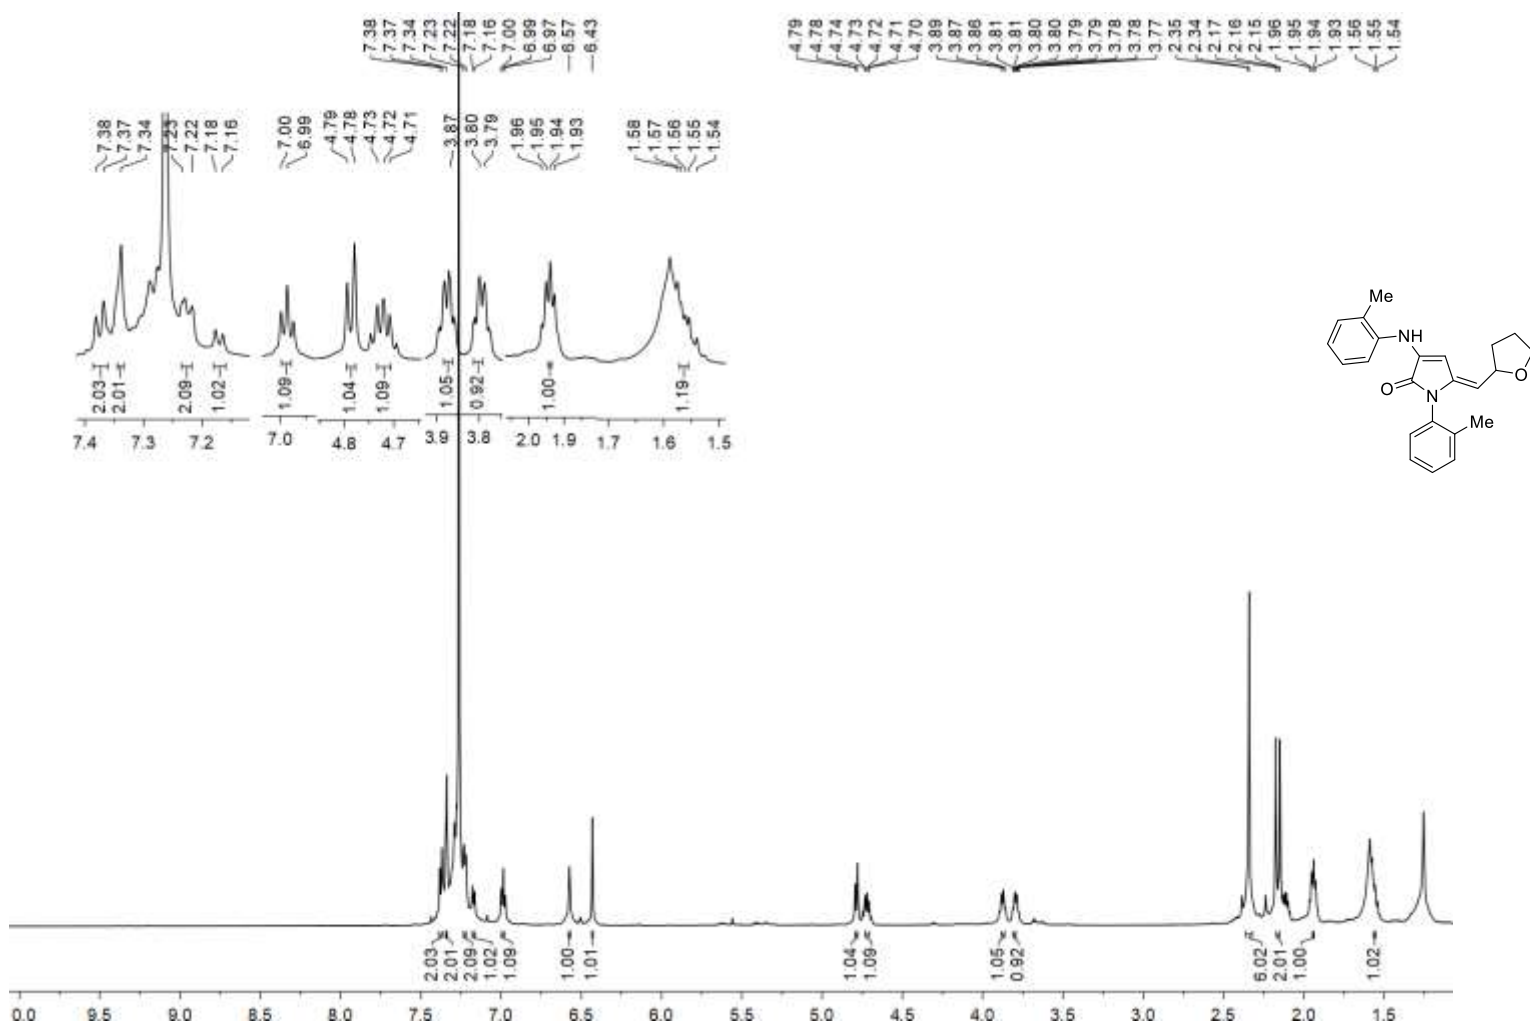

Figure S112. <sup>1</sup>H NMR (600 MHz, CDCl<sub>3</sub>) spectra of compound **8d**



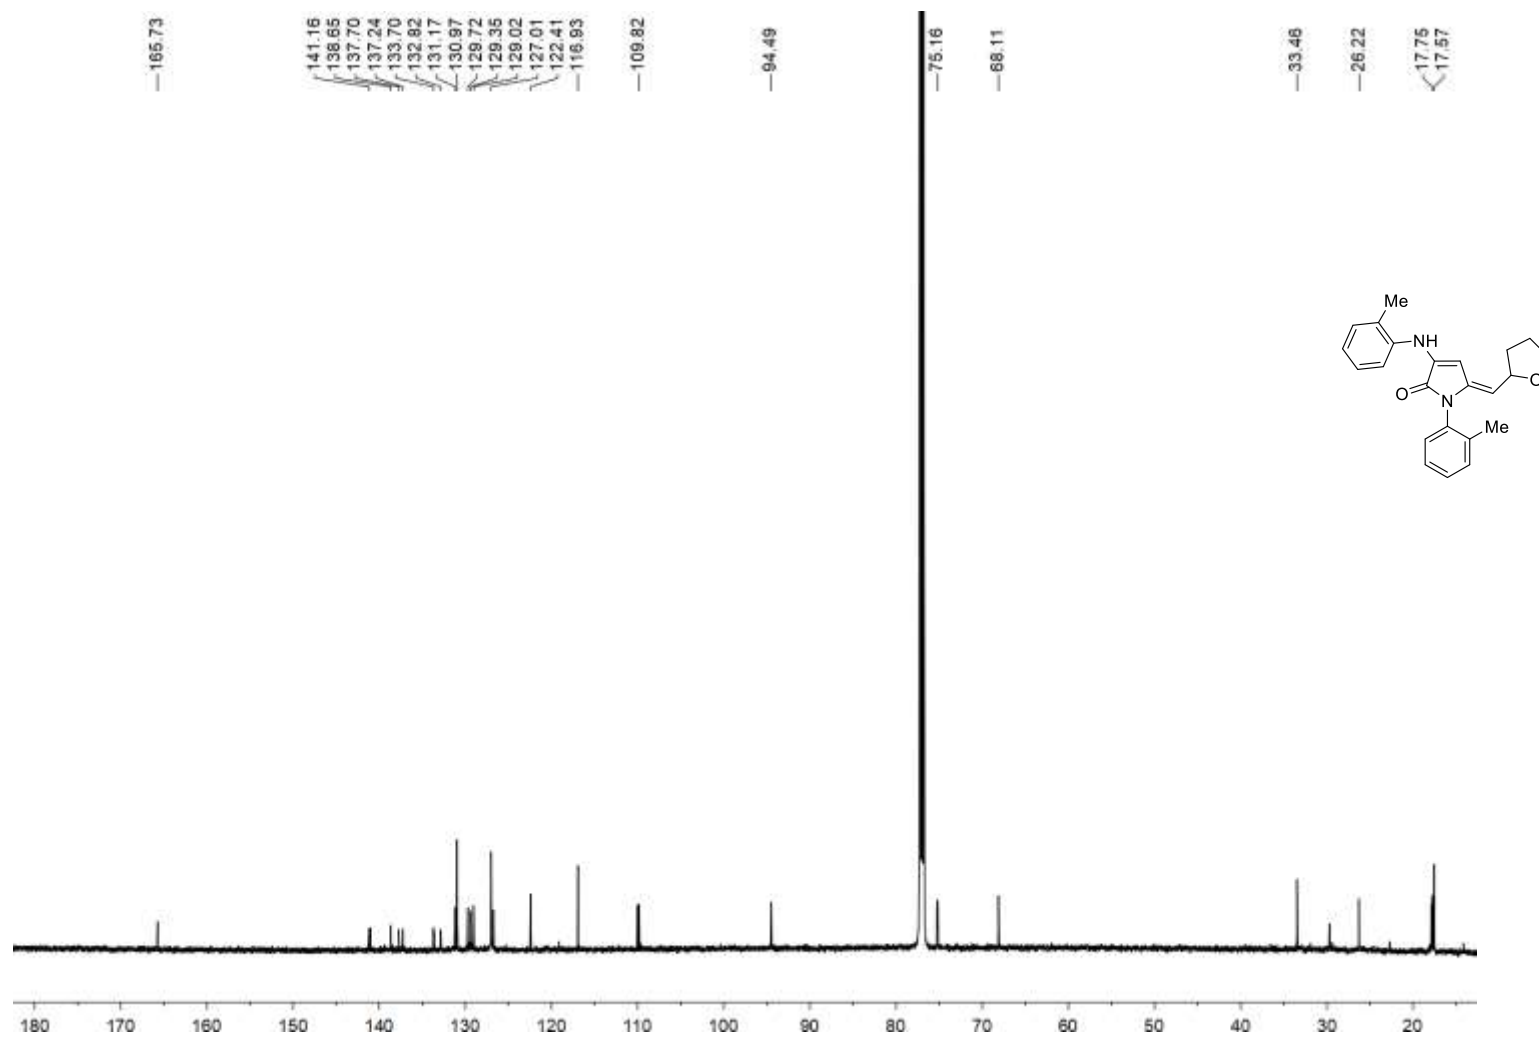

Figure S113.  $^{13}\text{C}$  NMR (150 MHz,  $\text{CDCl}_3$ ) spectra of compound **8d**

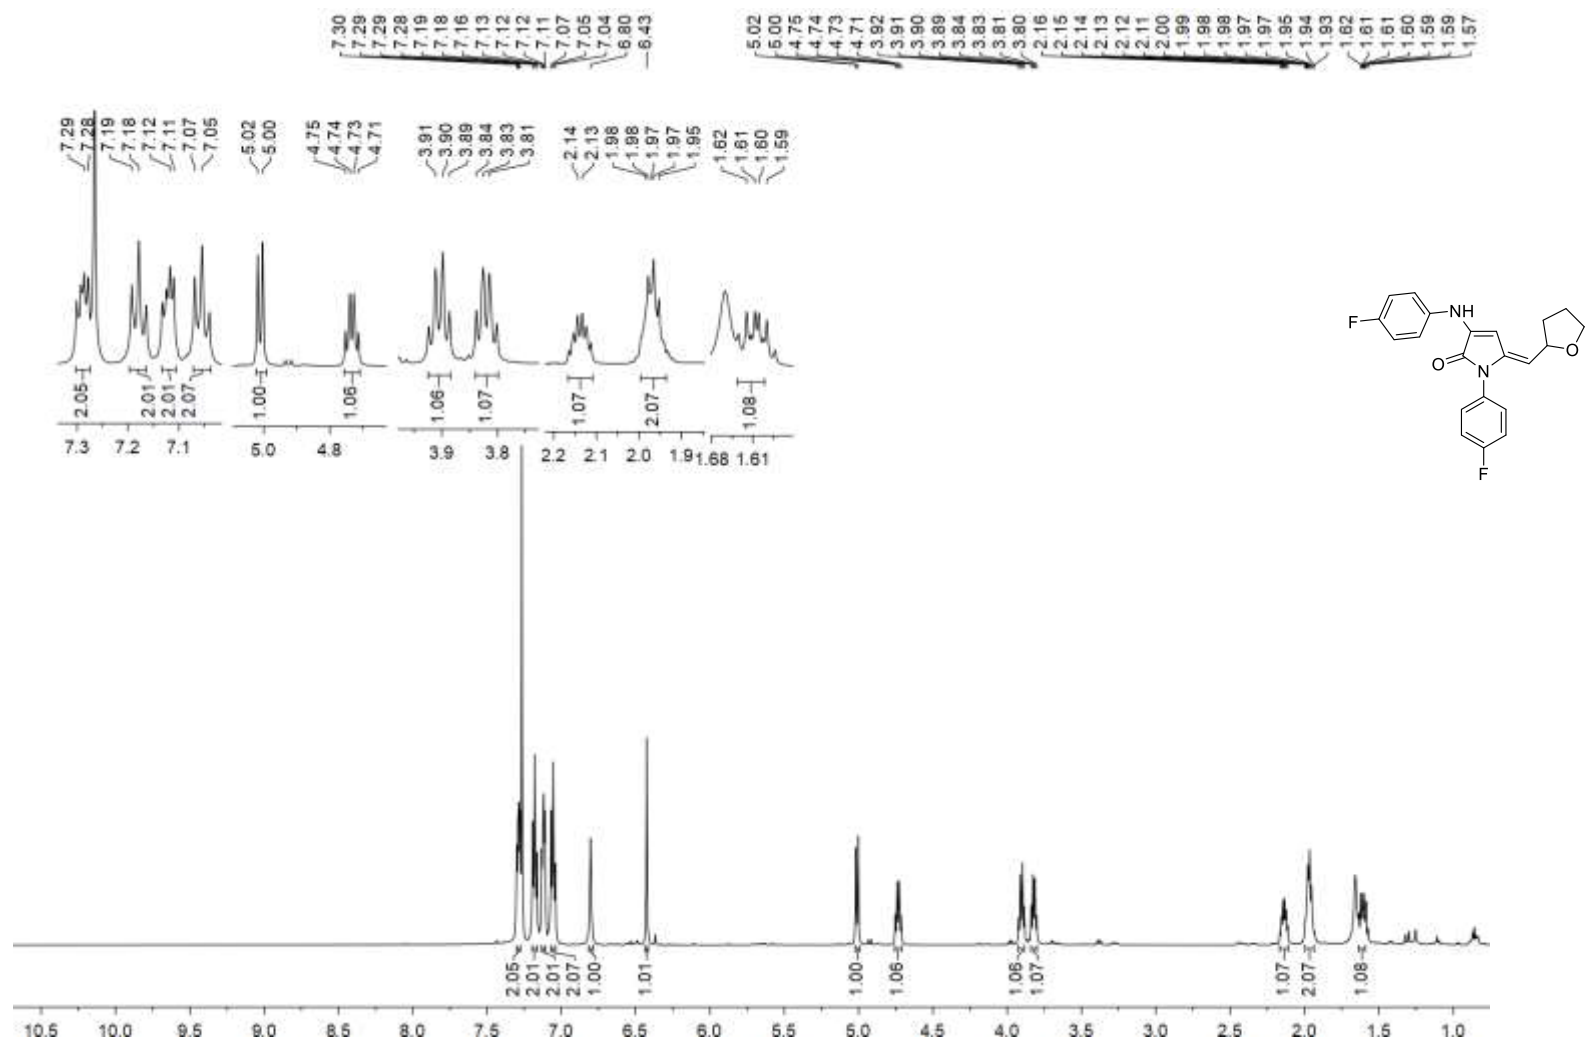

Figure S114. <sup>1</sup>H NMR (600 MHz, CDCl<sub>3</sub>) spectra of compound **8e**

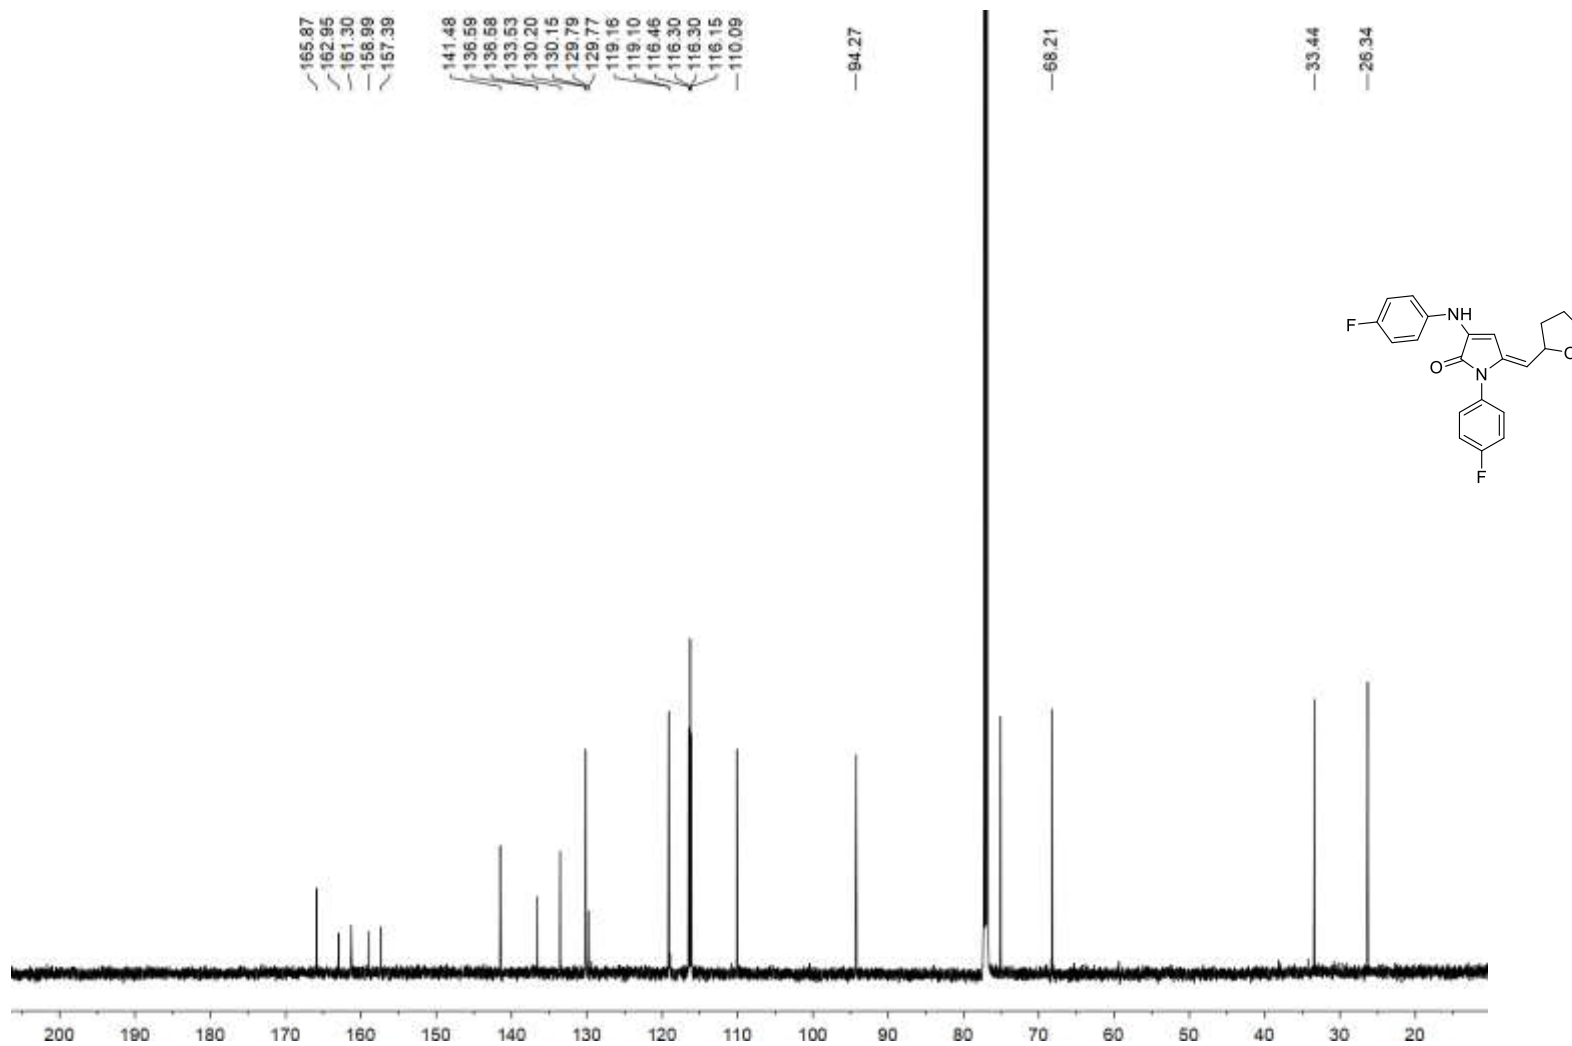

Figure S115.  $^{13}\text{C}$  NMR (150 MHz,  $\text{CDCl}_3$ ) spectra of compound **8e**

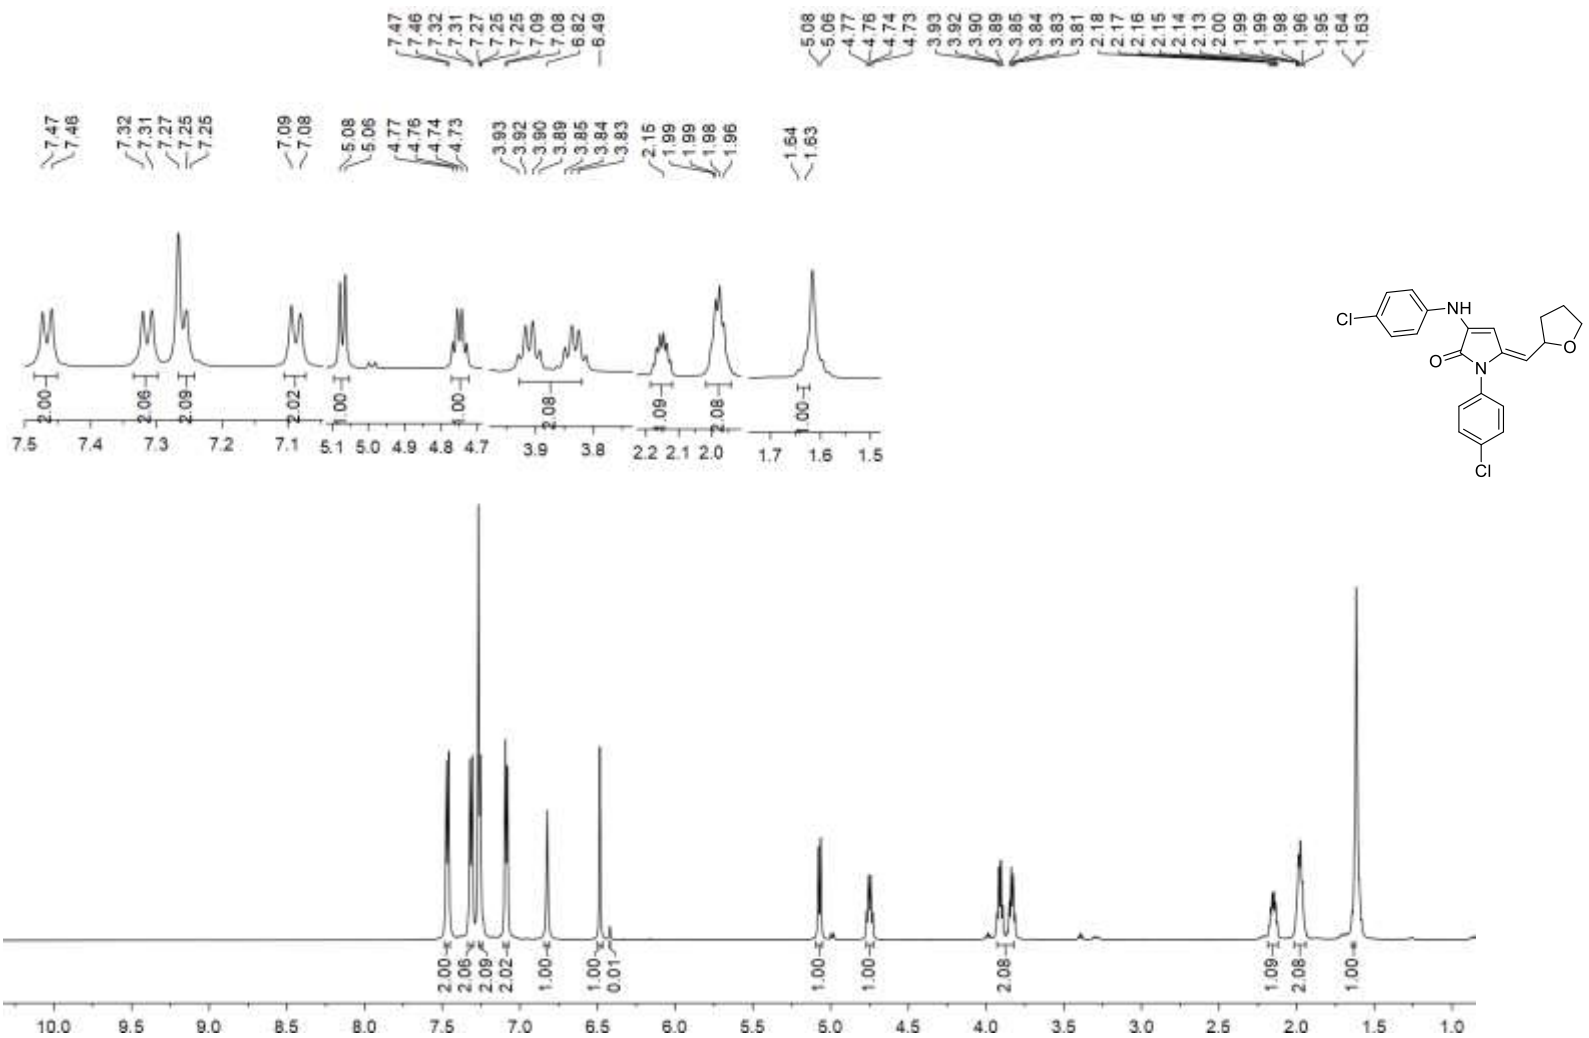

Figure S116. <sup>1</sup>H NMR (600 MHz, CDCl<sub>3</sub>) spectra of compound **8f**

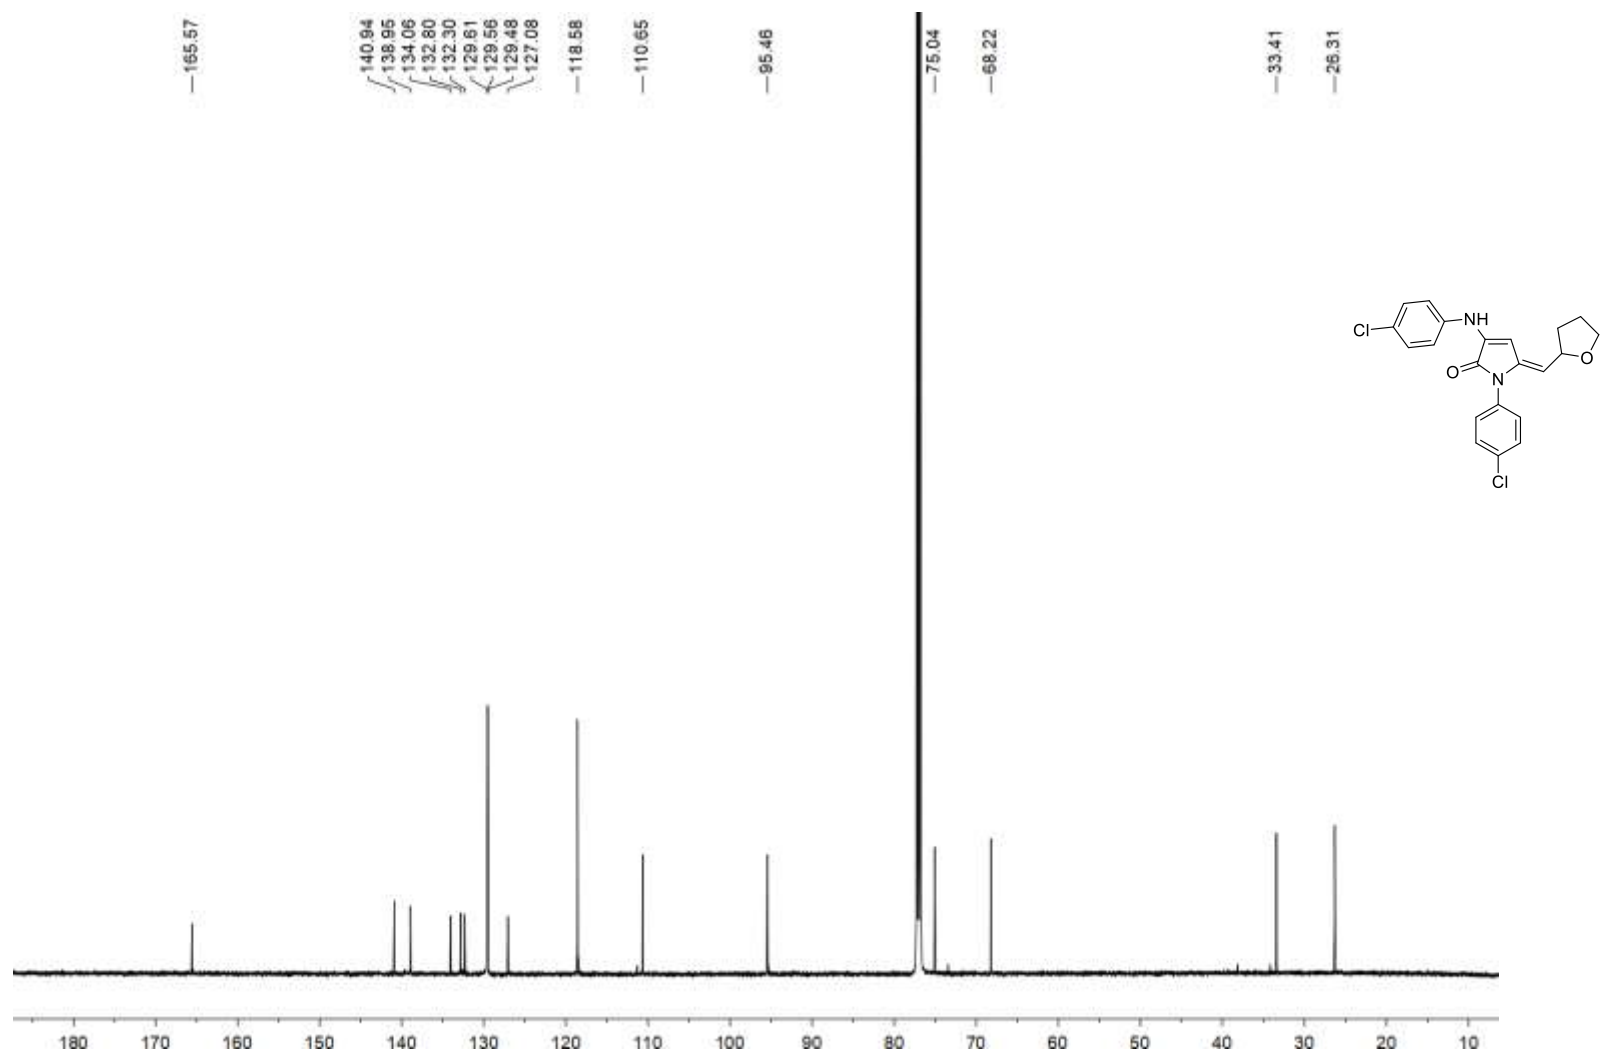

Figure S117.  $^{13}\text{C}$  NMR (150 MHz,  $\text{CDCl}_3$ ) spectra of compound **8f**

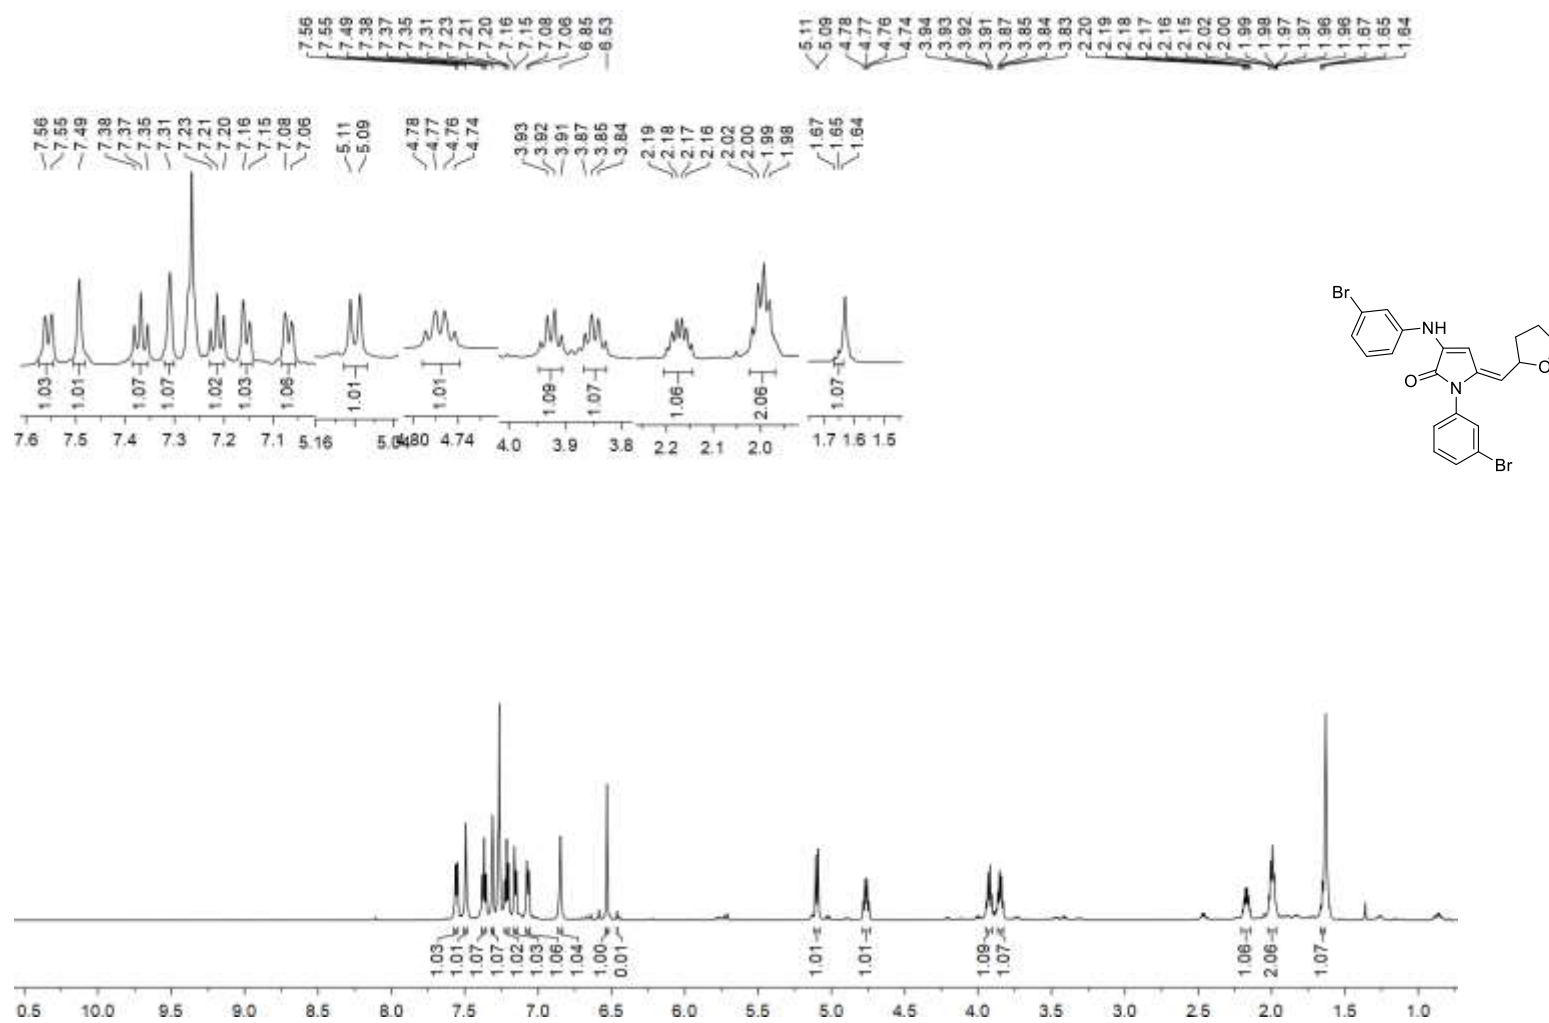

**Figure S118.** <sup>1</sup>H NMR (600 MHz, CDCl<sub>3</sub>) spectra of compound **8g**

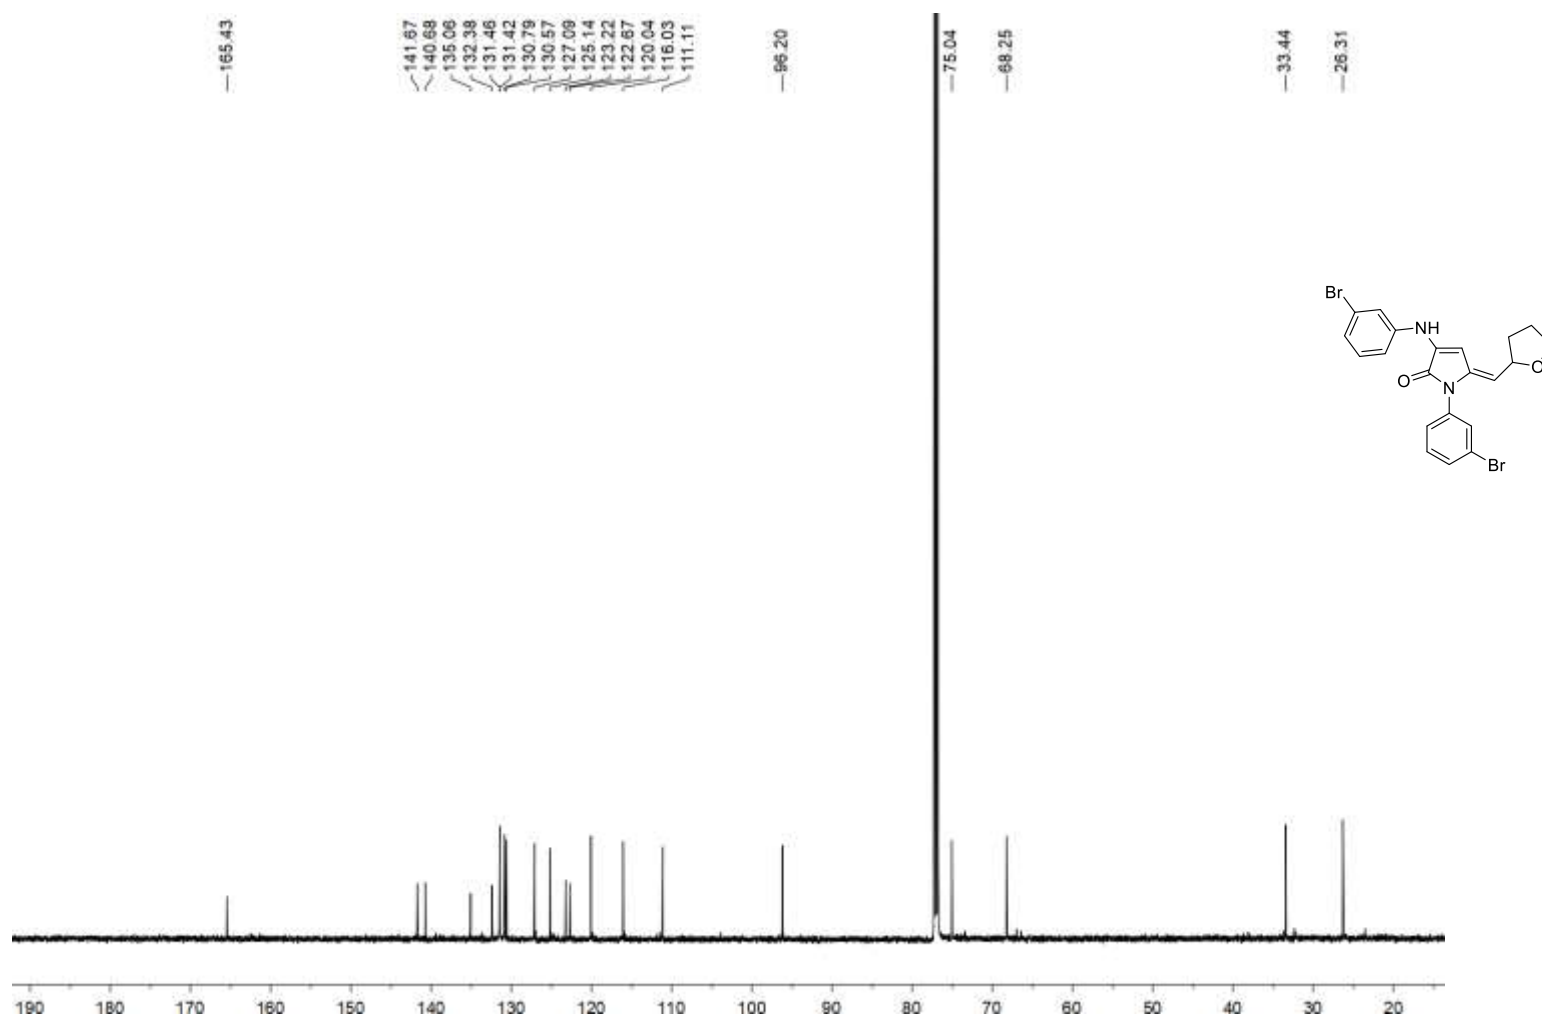

**Figure S119.** <sup>13</sup>C NMR (150 MHz, CDCl<sub>3</sub>) spectra of compound **8g**

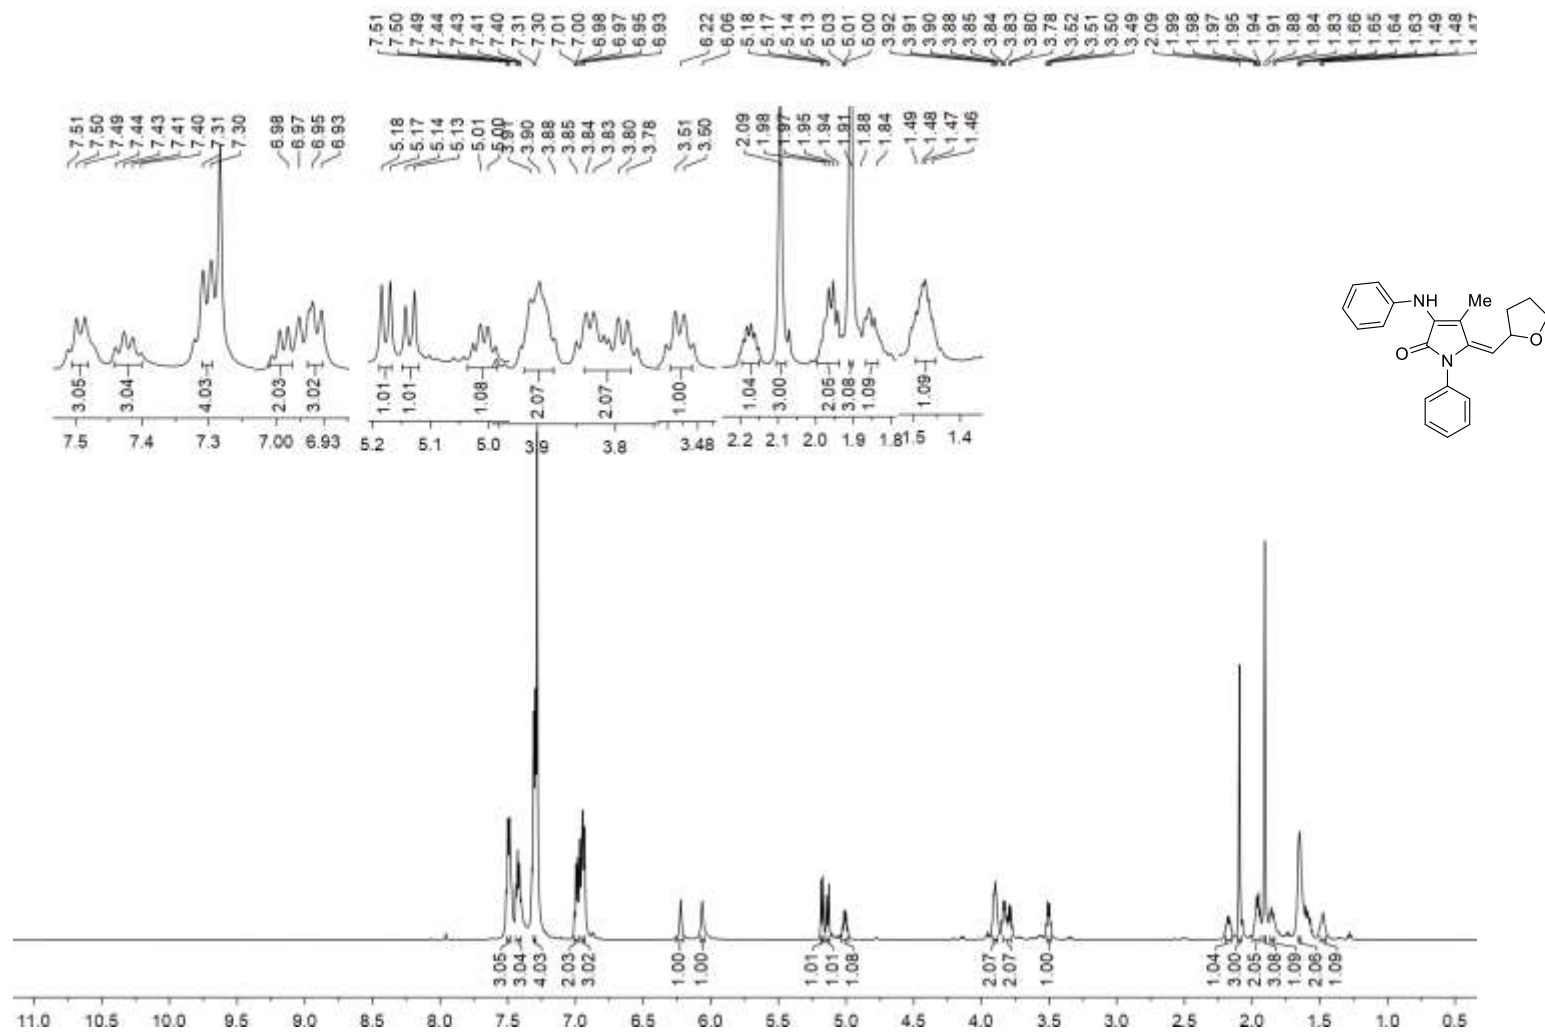

**Figure S120.** <sup>1</sup>H NMR (600 MHz, CDCl<sub>3</sub>) spectra of compound **8h**



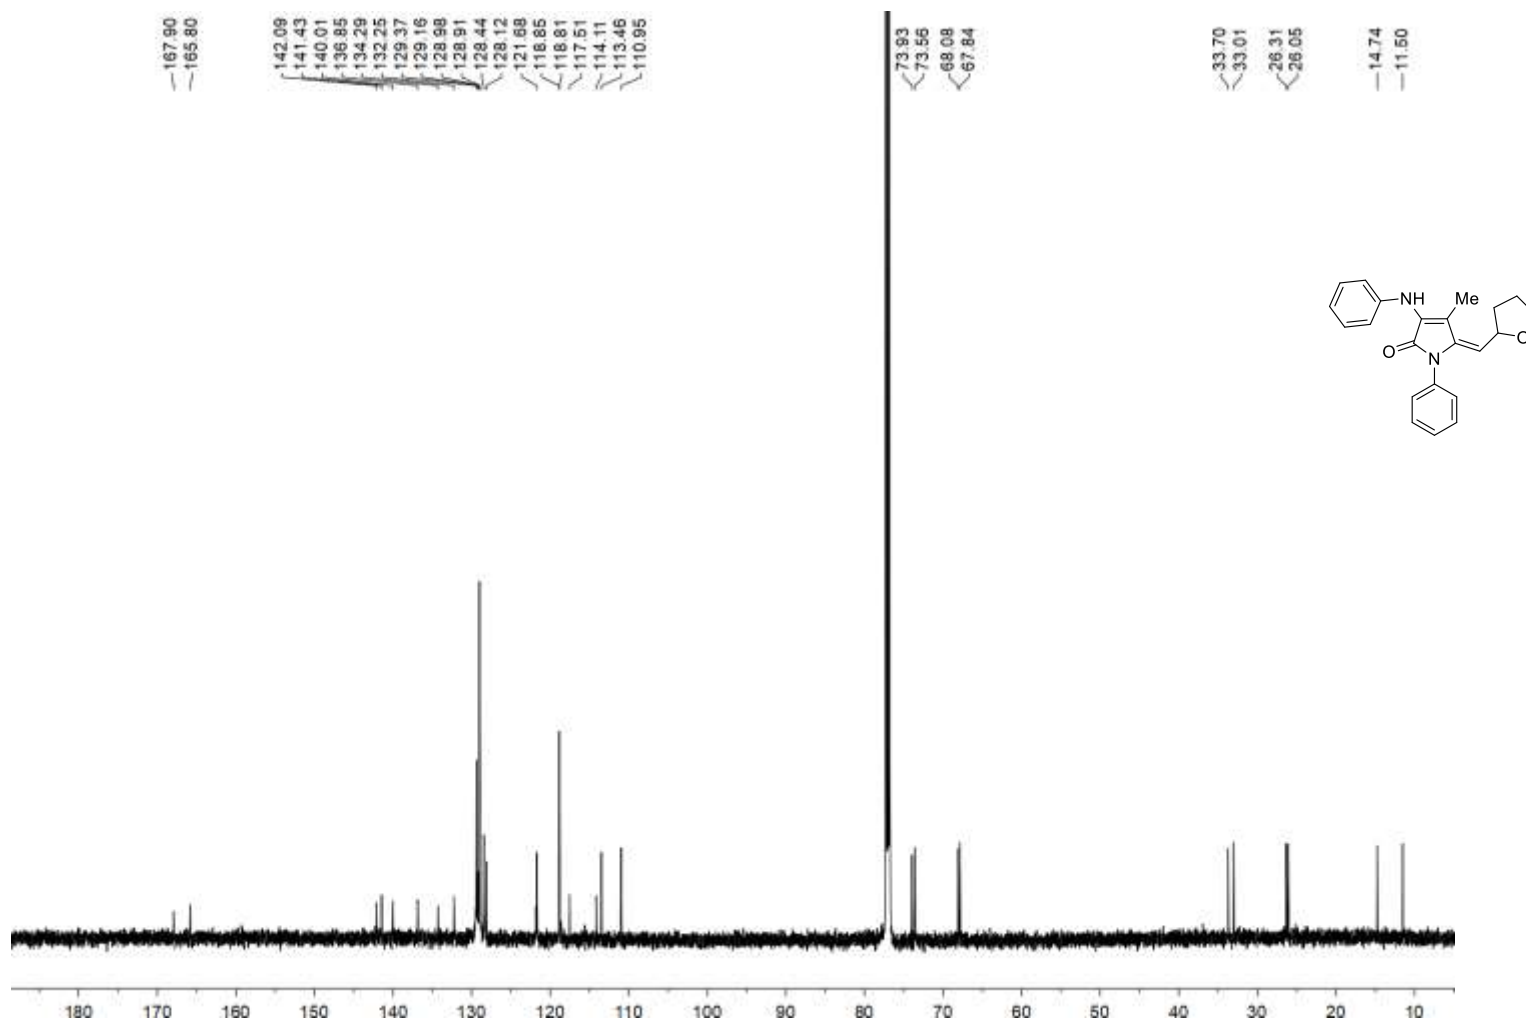

**Figure S121.**  $^{13}\text{C}$  NMR (150 MHz,  $\text{CDCl}_3$ ) spectra of compound **8h**

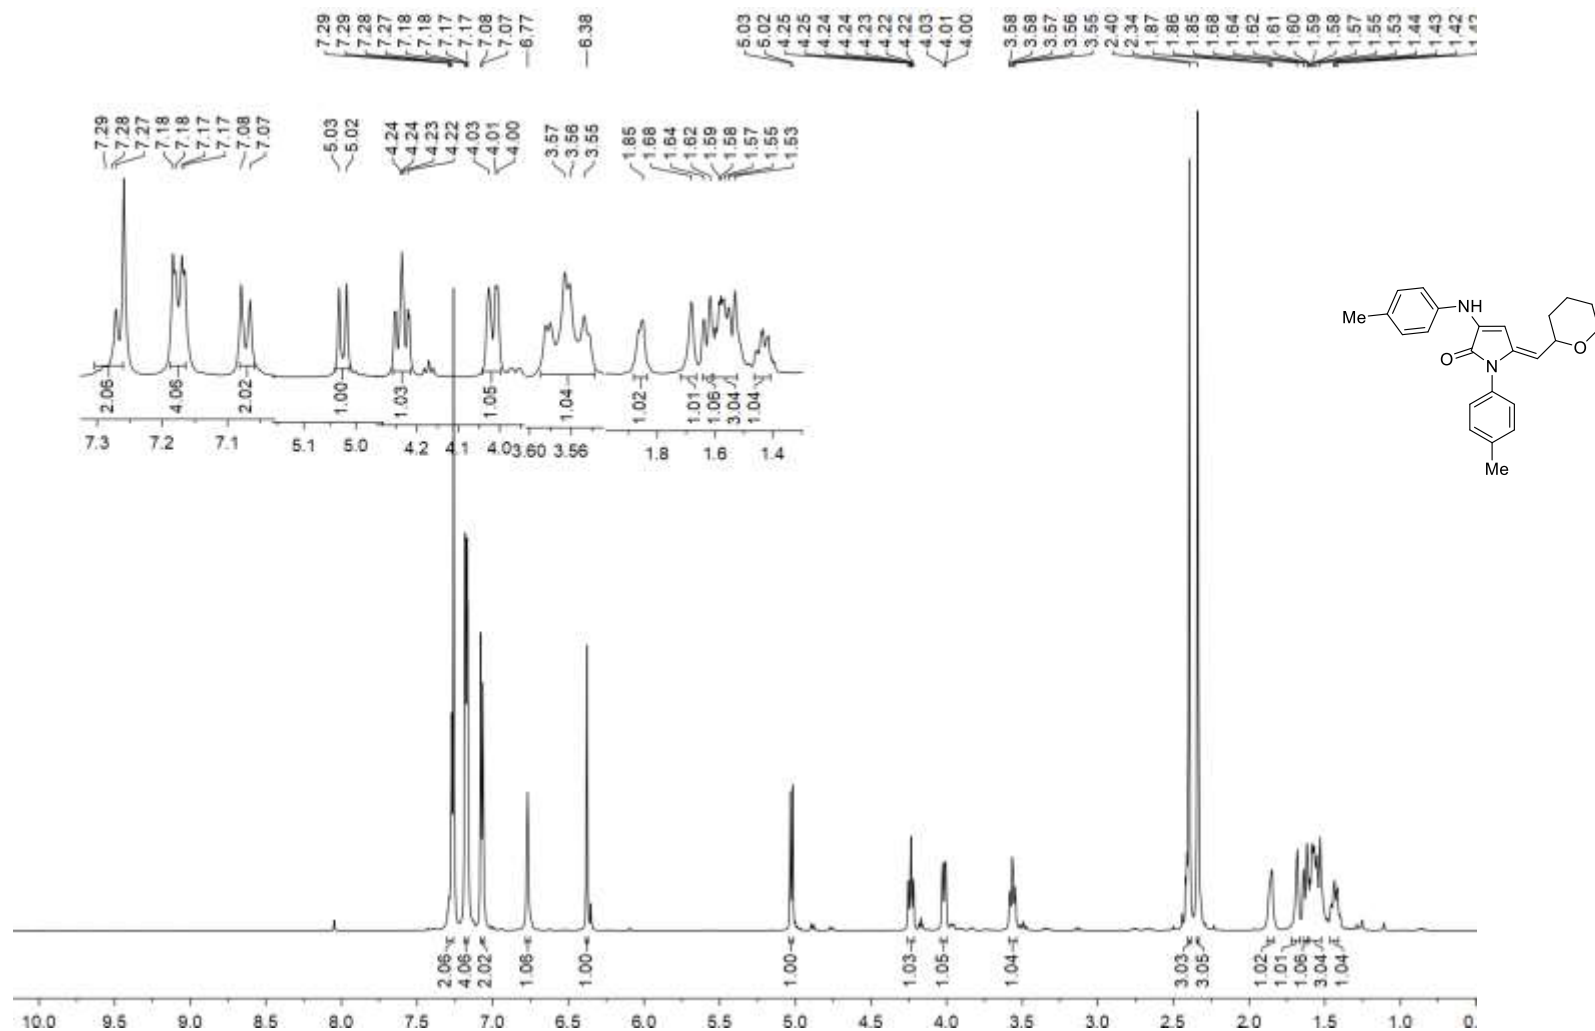

Figure S122. <sup>1</sup>H NMR (600 MHz, CDCl<sub>3</sub>) spectra of compound **8i**

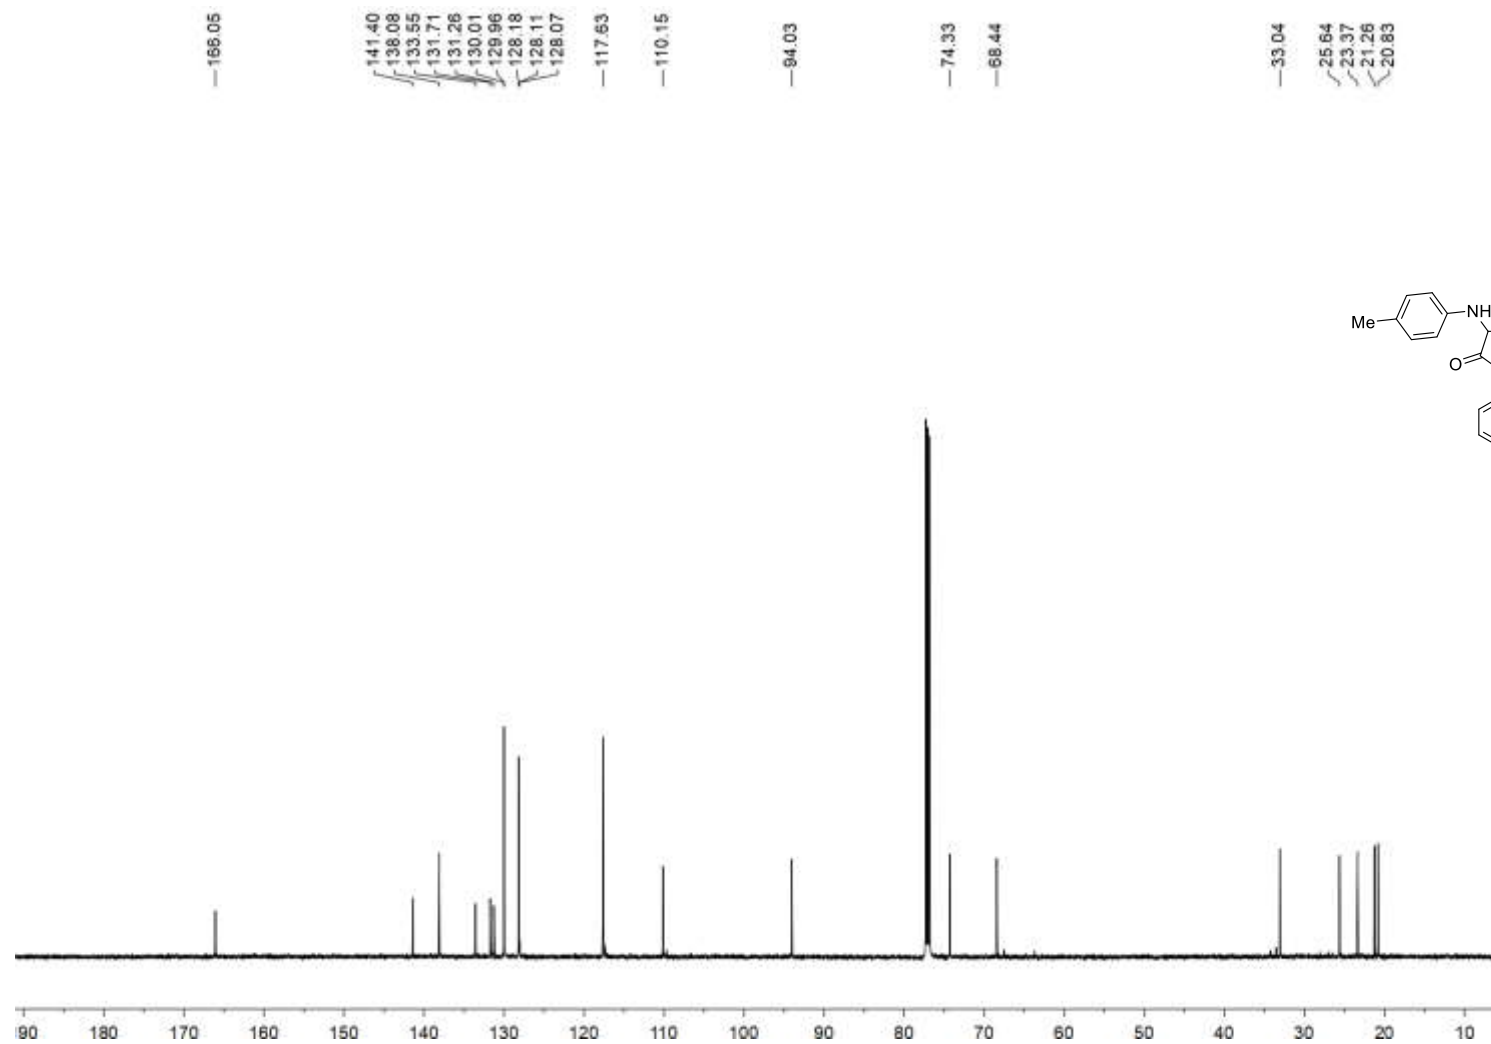

Figure S123.  $^{13}\text{C}$  NMR (150 MHz,  $\text{CDCl}_3$ ) spectra of compound **8i**

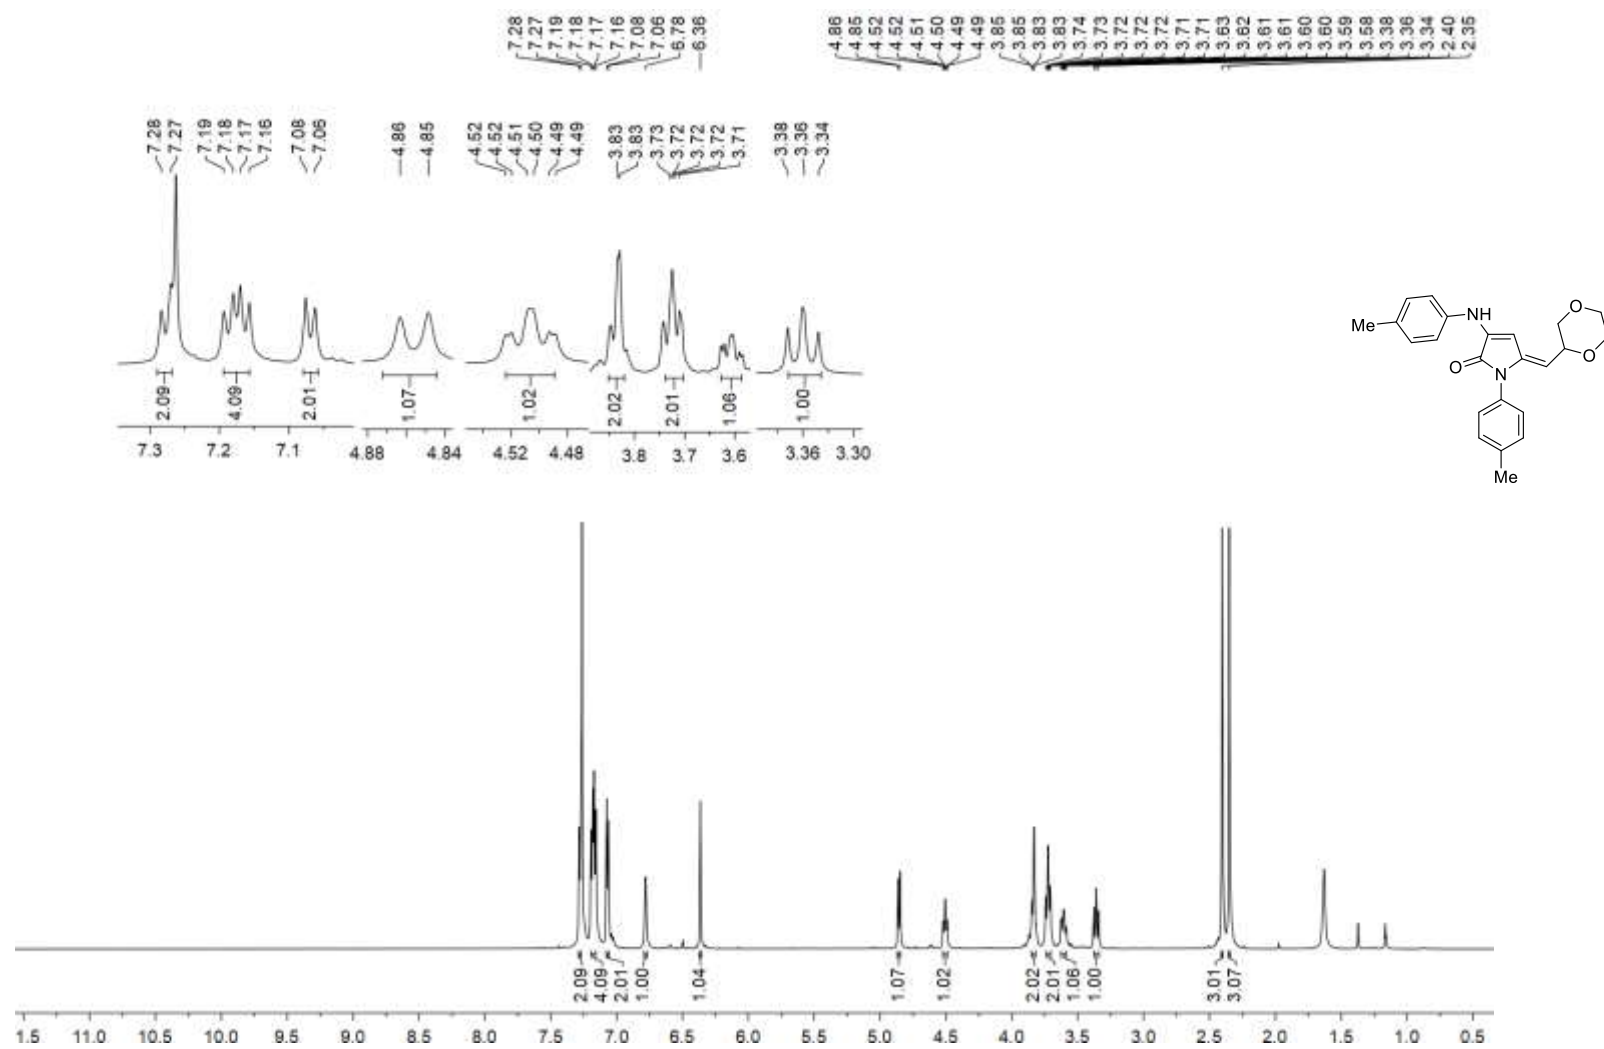

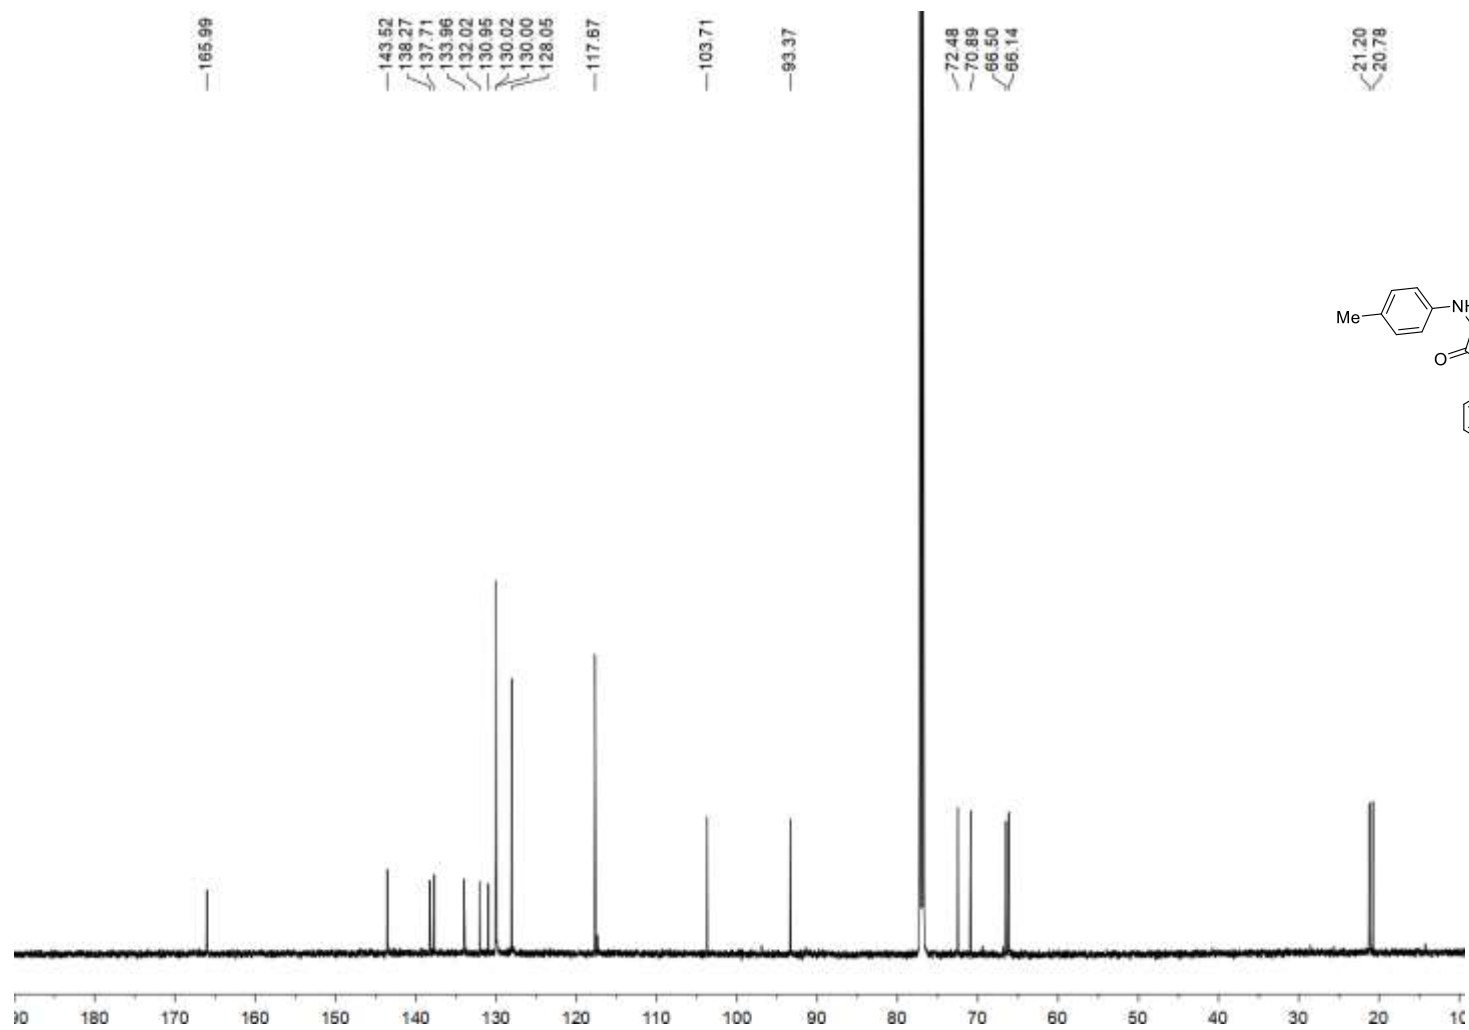

Figure S125.  $^{13}\text{C}$  NMR (150 MHz,  $\text{CDCl}_3$ ) spectra of compound **8j**

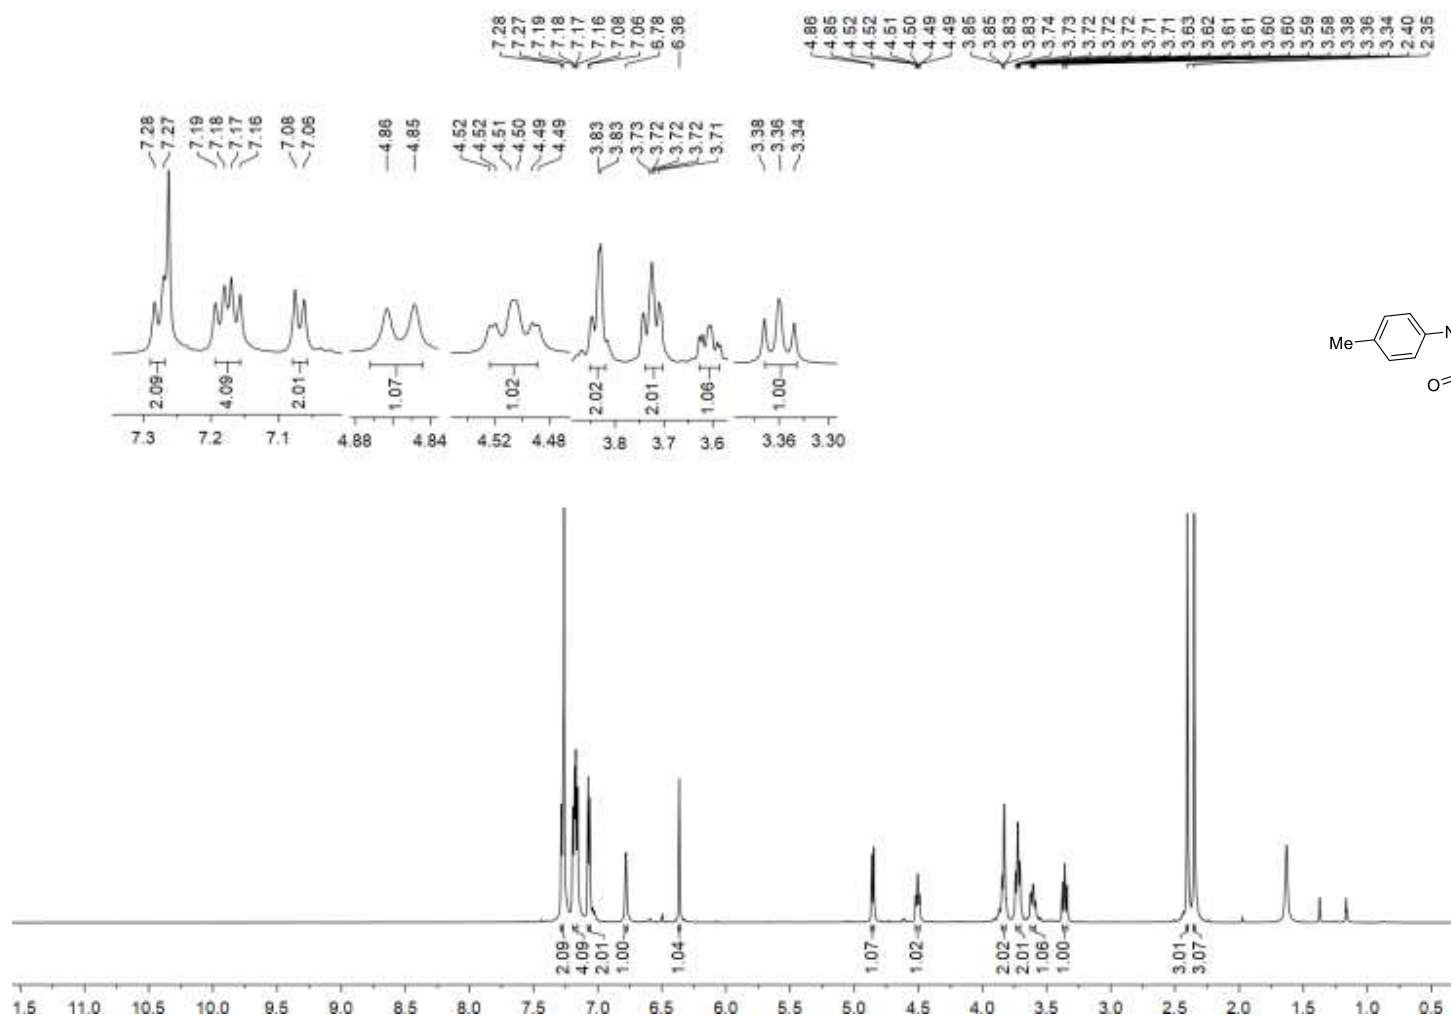

Figure S126. <sup>1</sup>H NMR (600 MHz, CDCl<sub>3</sub>) spectra of compound **8k**

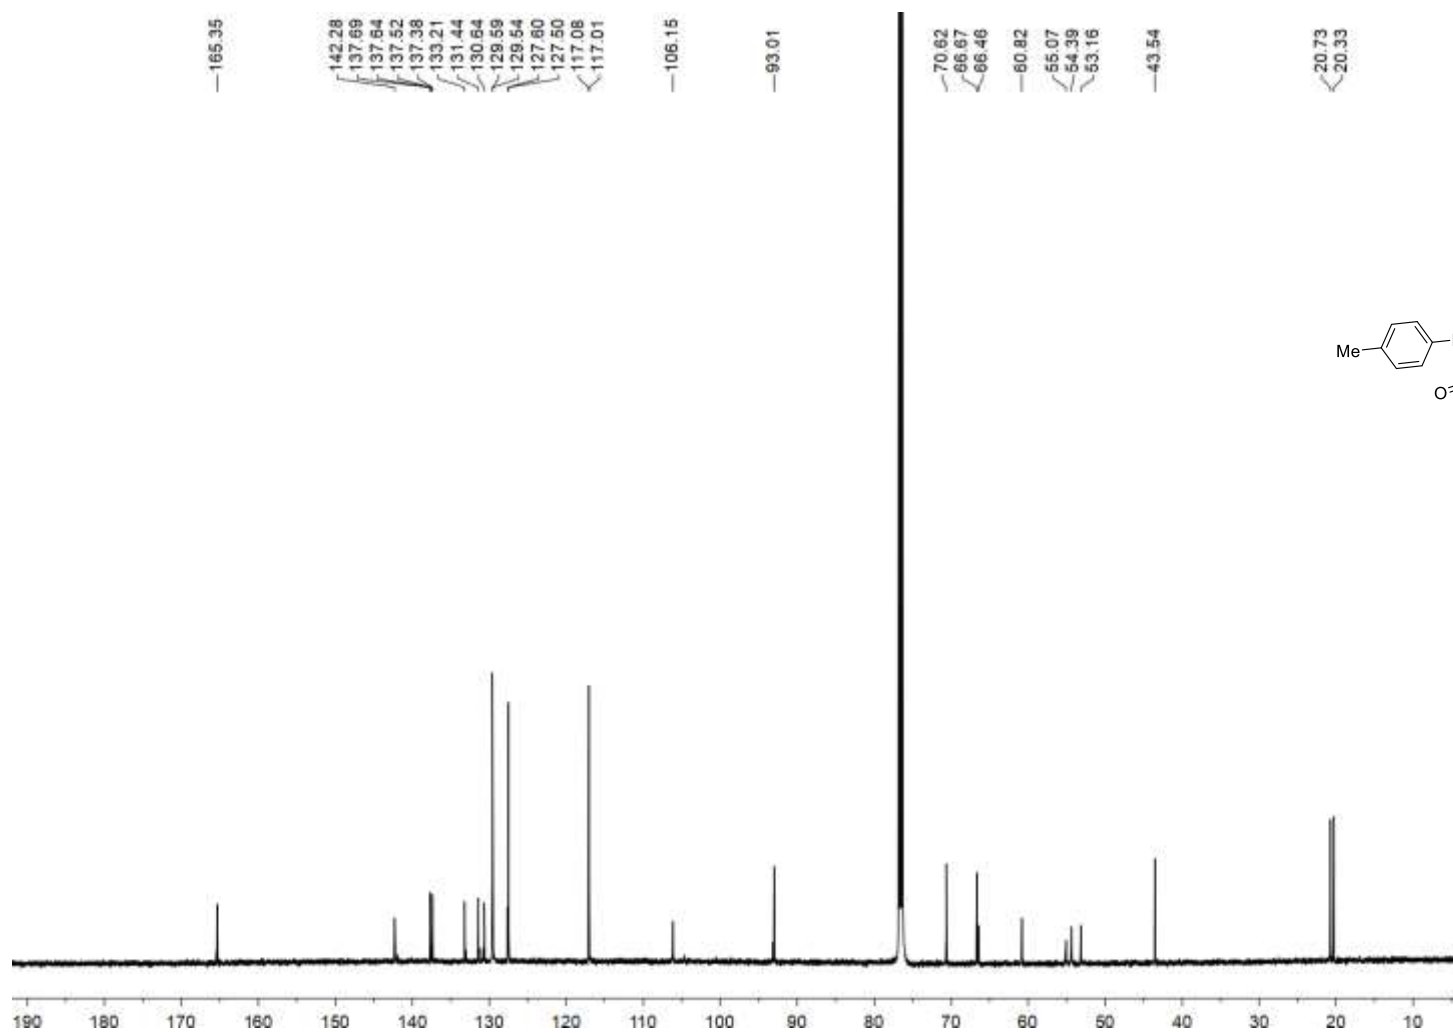

**Figure S127.** <sup>13</sup>C NMR (150 MHz, CDCl<sub>3</sub>) spectra of compound **8k**

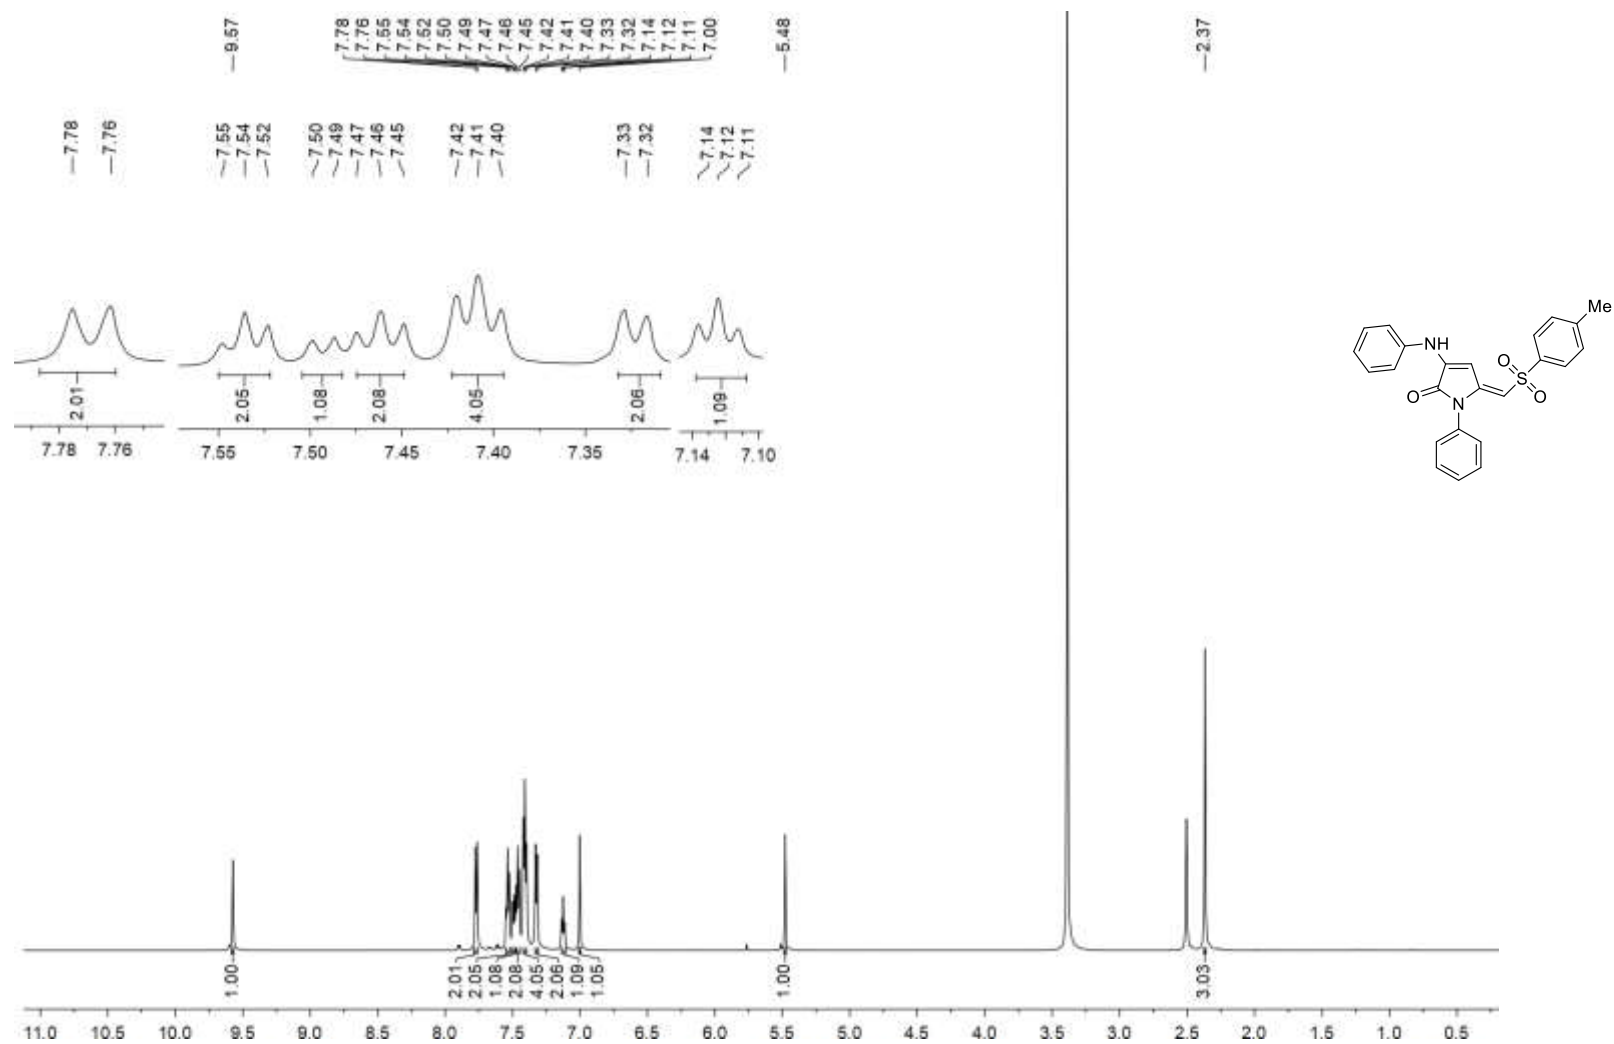

Figure S128. <sup>1</sup>H NMR (600 MHz, DMSO-*d*<sub>6</sub>) spectra of compound **9**



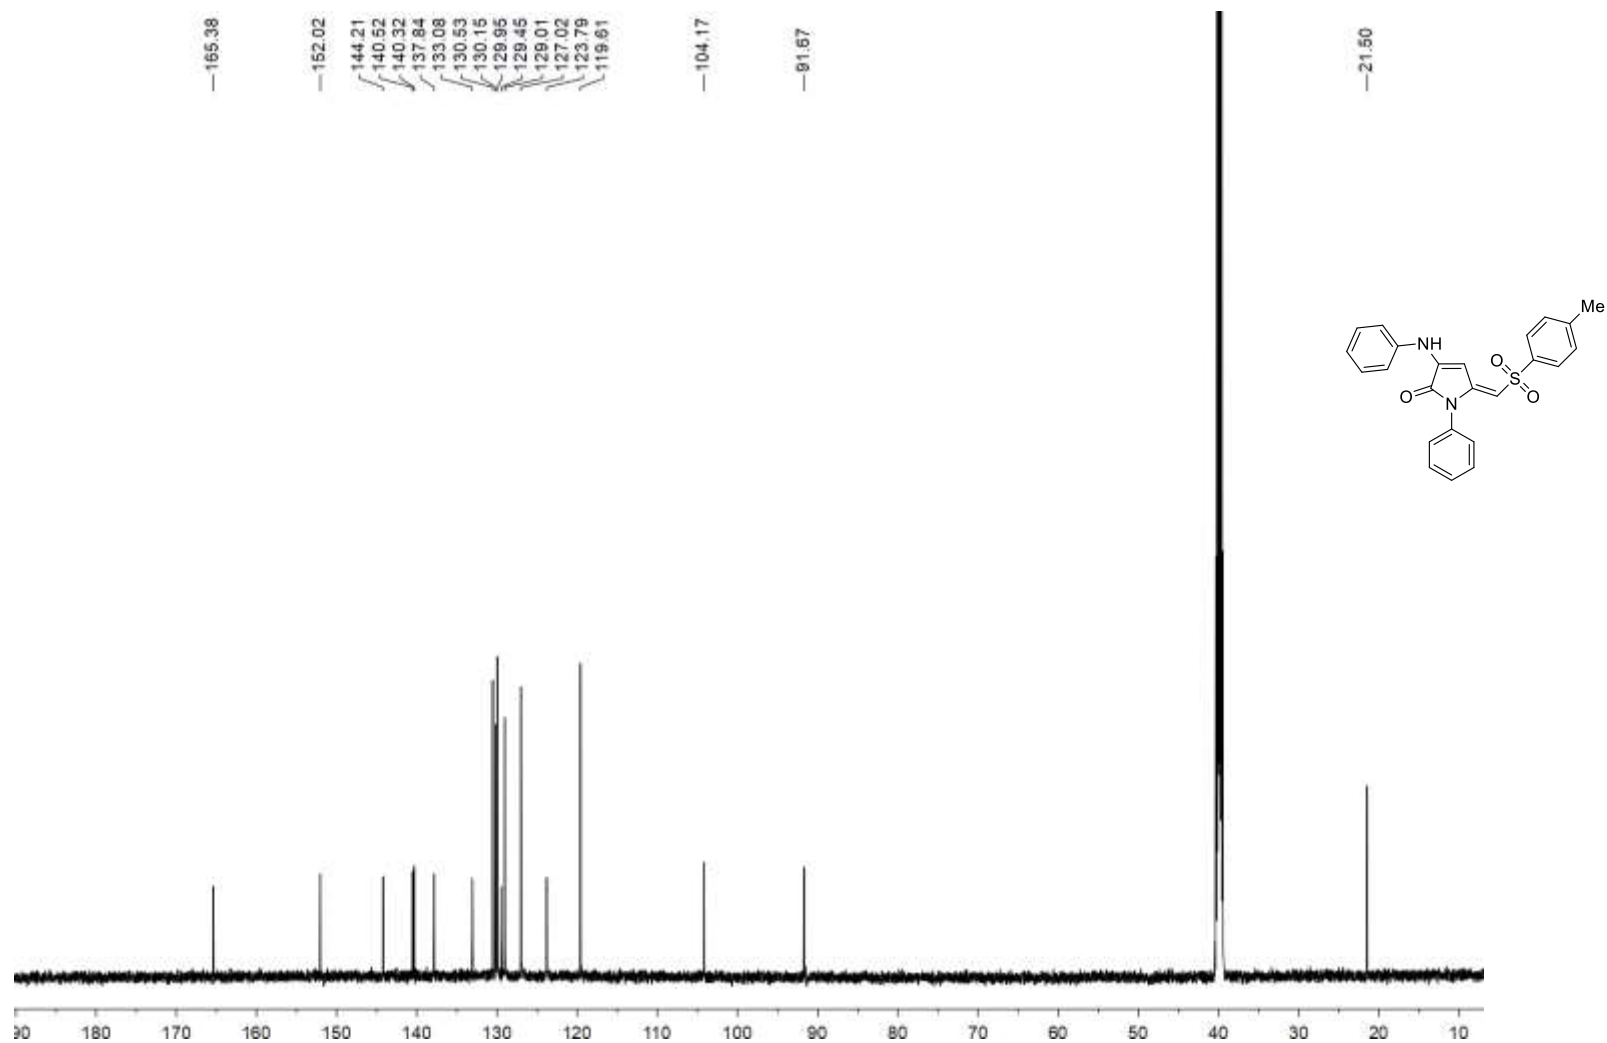

Figure S129. <sup>13</sup>C NMR (150 MHz, DMSO-*d*<sub>6</sub>) spectra of compound 9

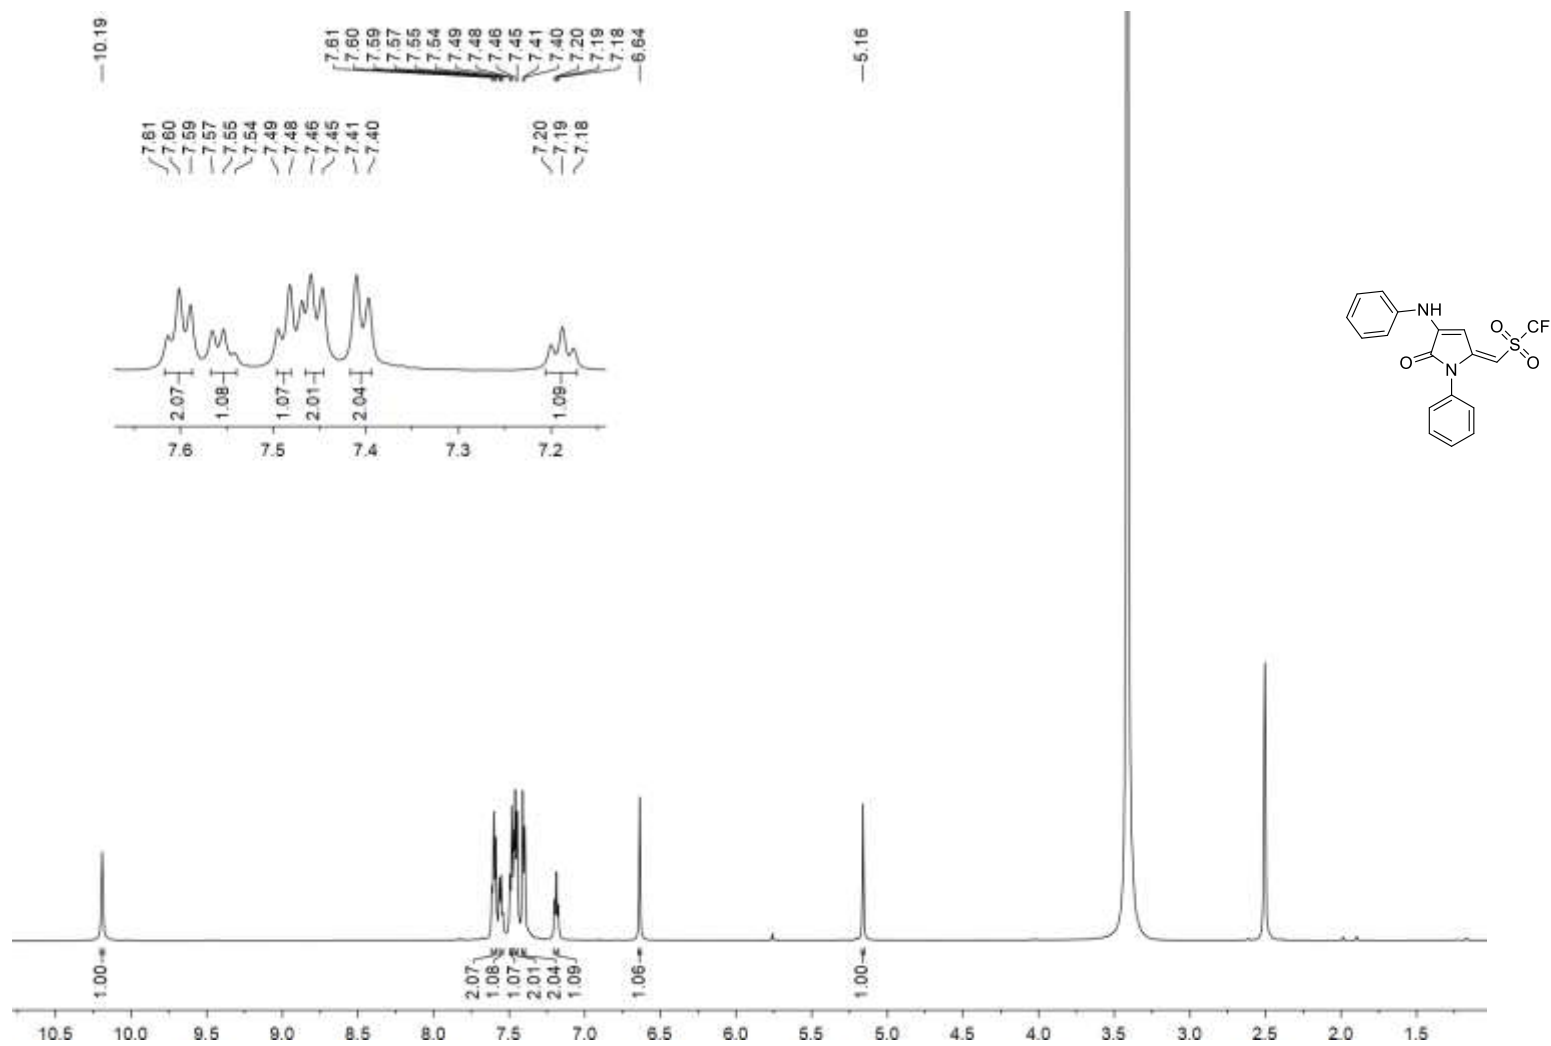

Figure S130. <sup>1</sup>H NMR (600 MHz, DMSO-*d*<sub>6</sub>) spectra of compound **10**

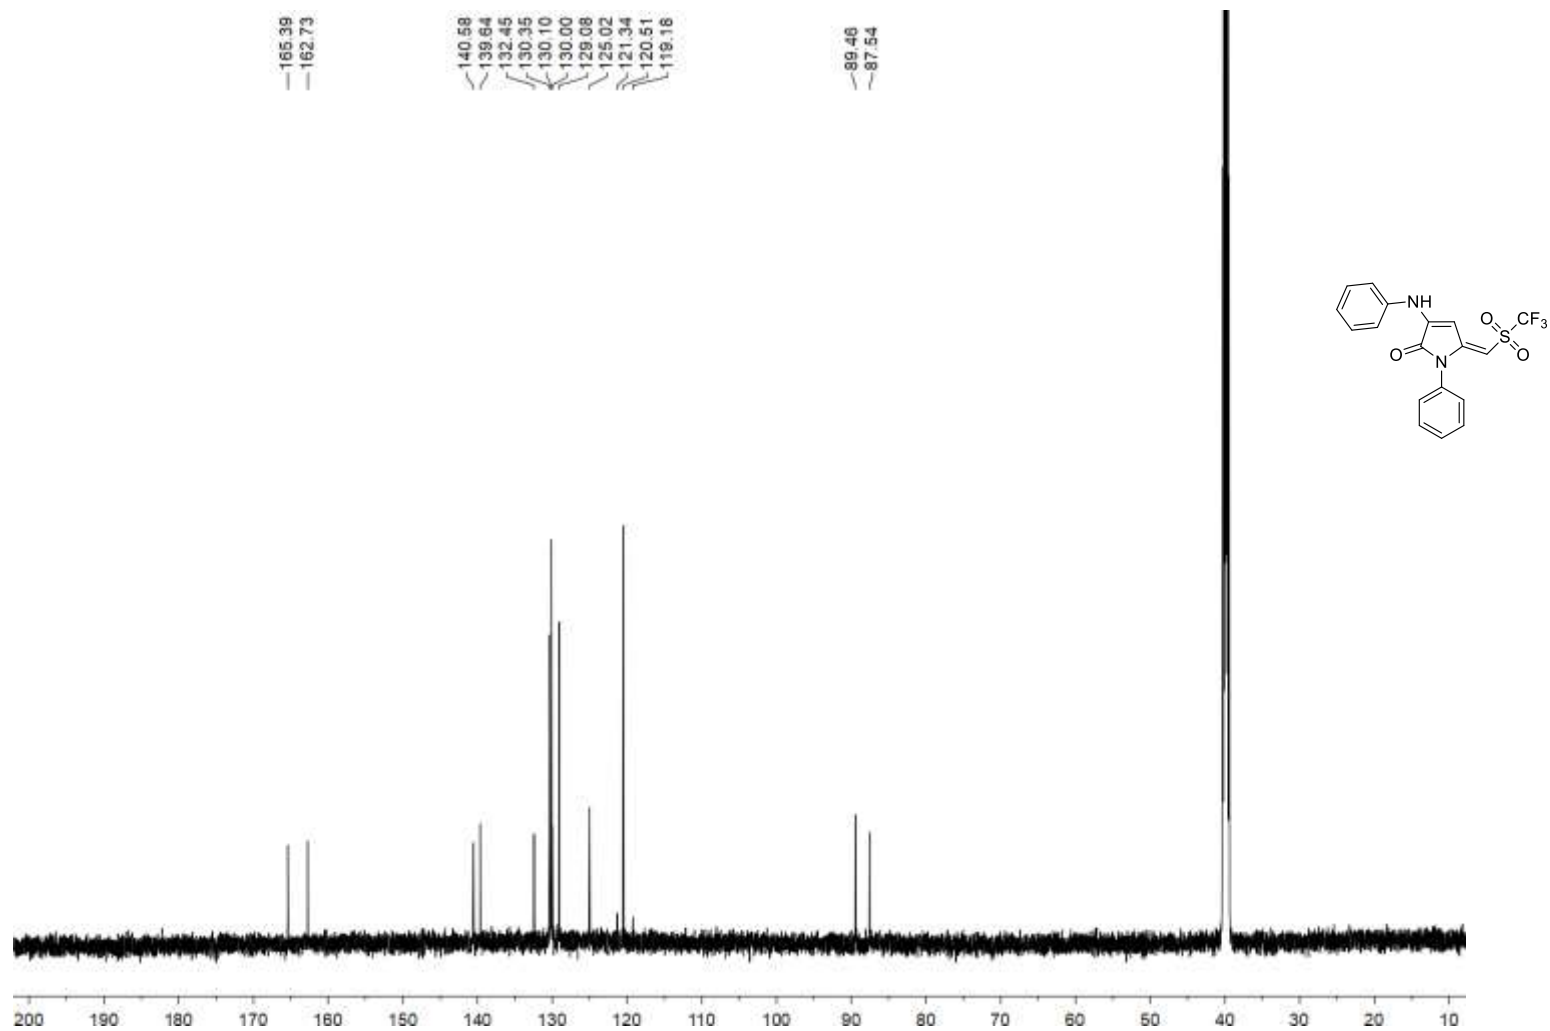

Figure S131.  $^{13}\text{C}$  NMR (150 MHz,  $\text{DMSO-}d_6$ ) spectra of compound **10**

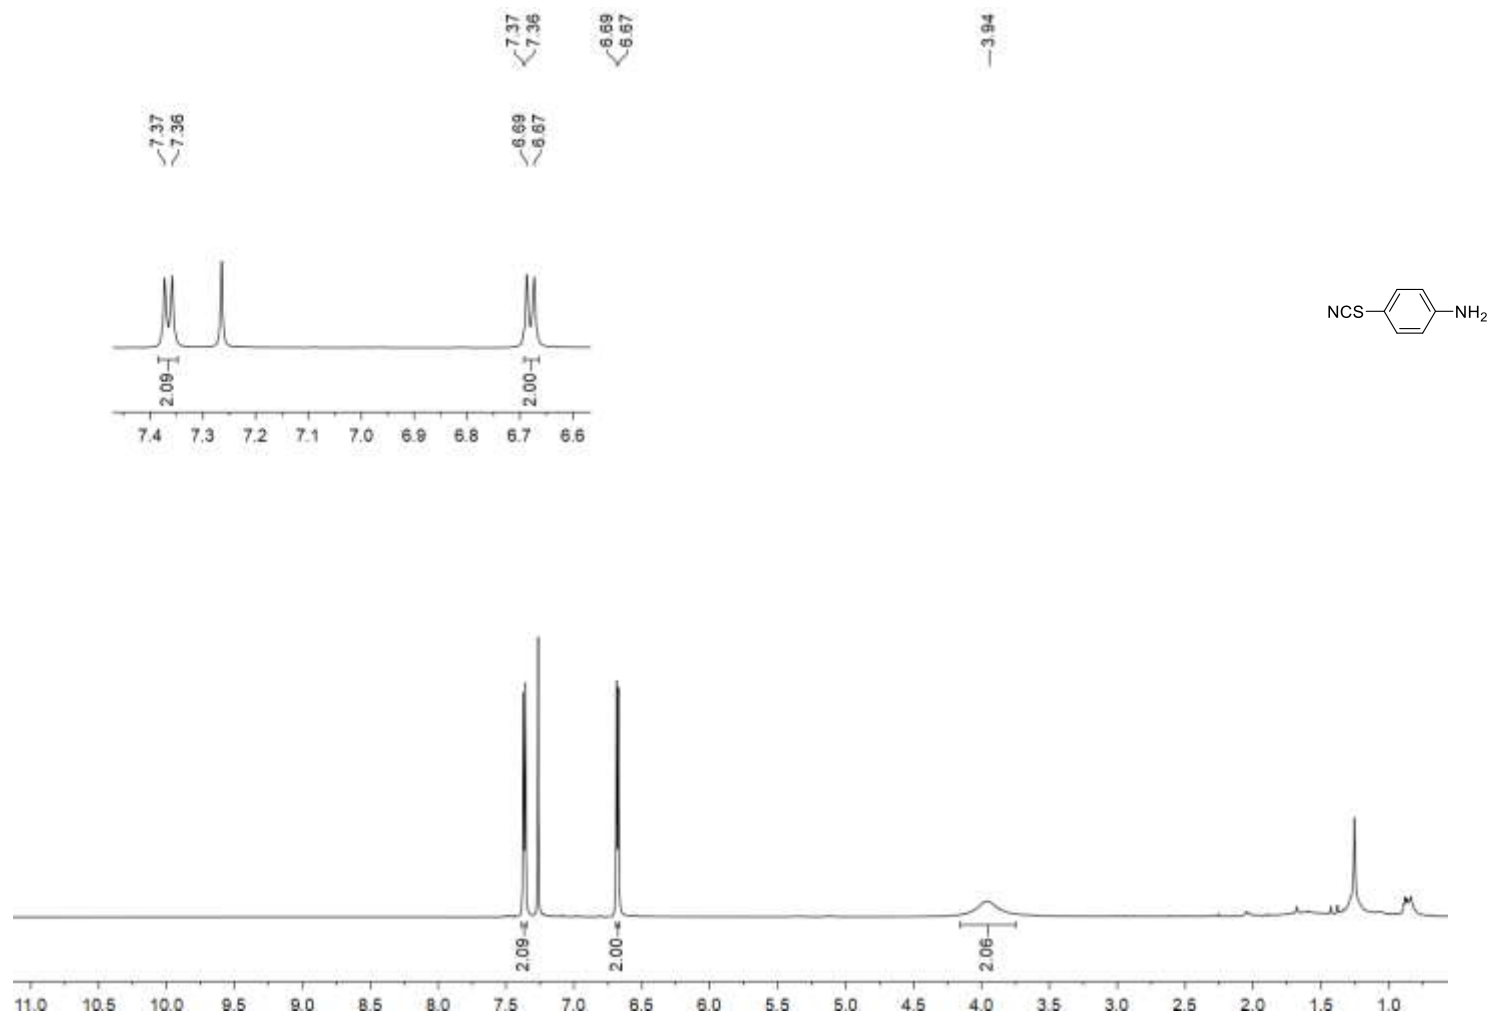

**Figure S132.**  $^1\text{H}$  NMR (600 MHz,  $\text{CDCl}_3$ ) spectra of compound **11**

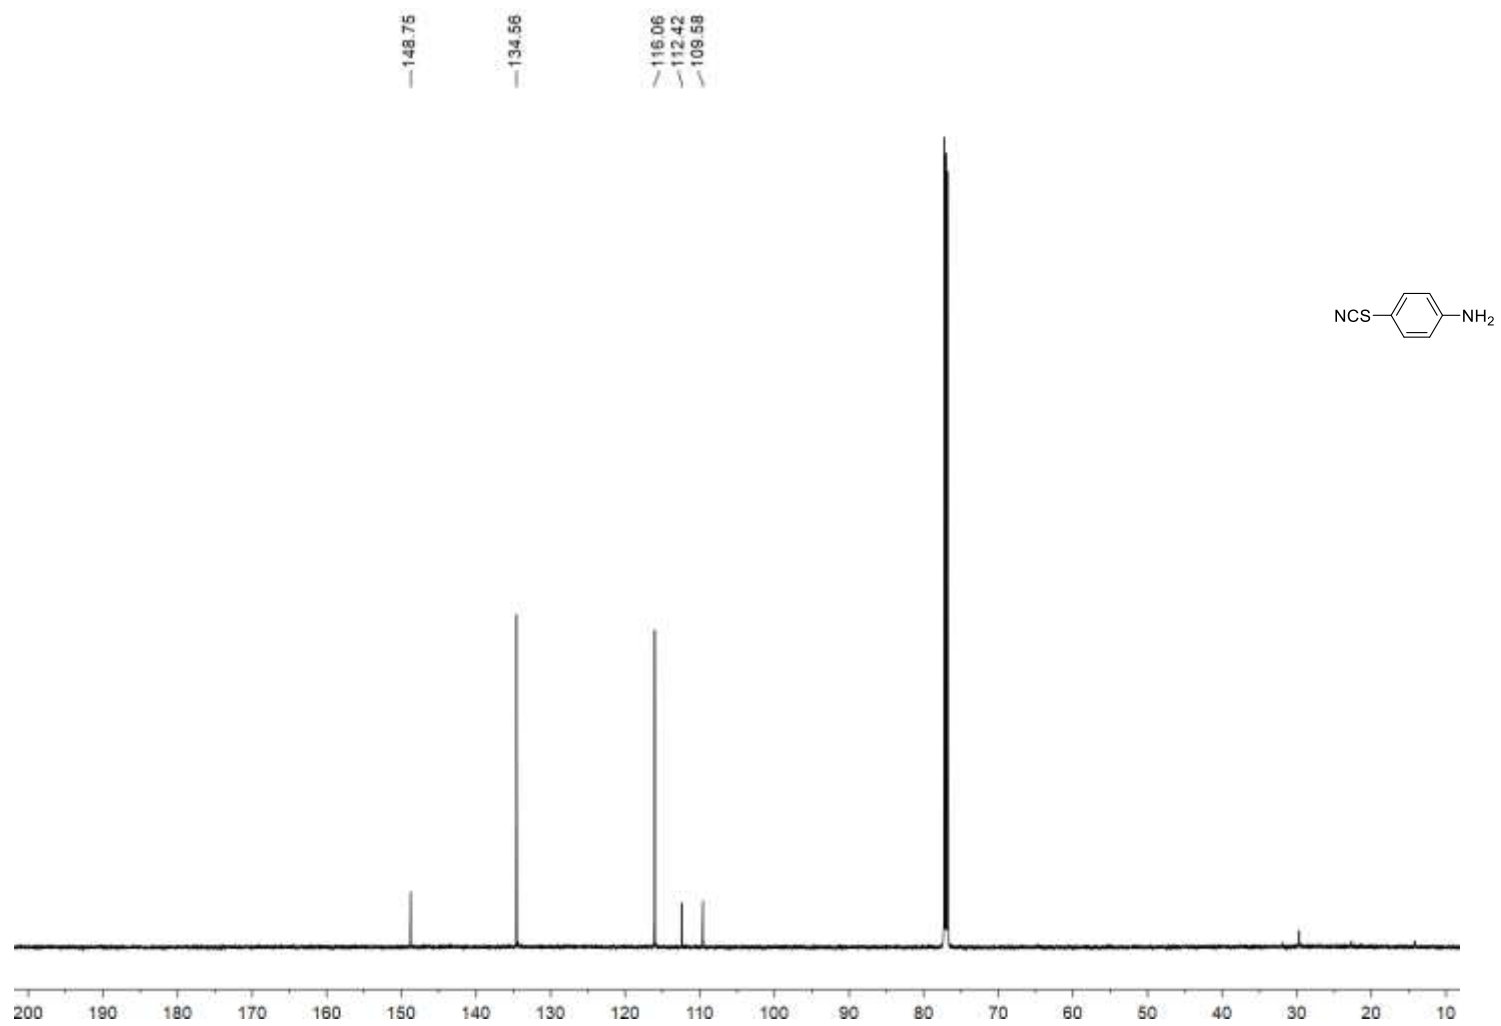

**Figure S133.**  $^{13}\text{C}$  NMR (150 MHz,  $\text{CDCl}_3$ ) spectra of compound **11**

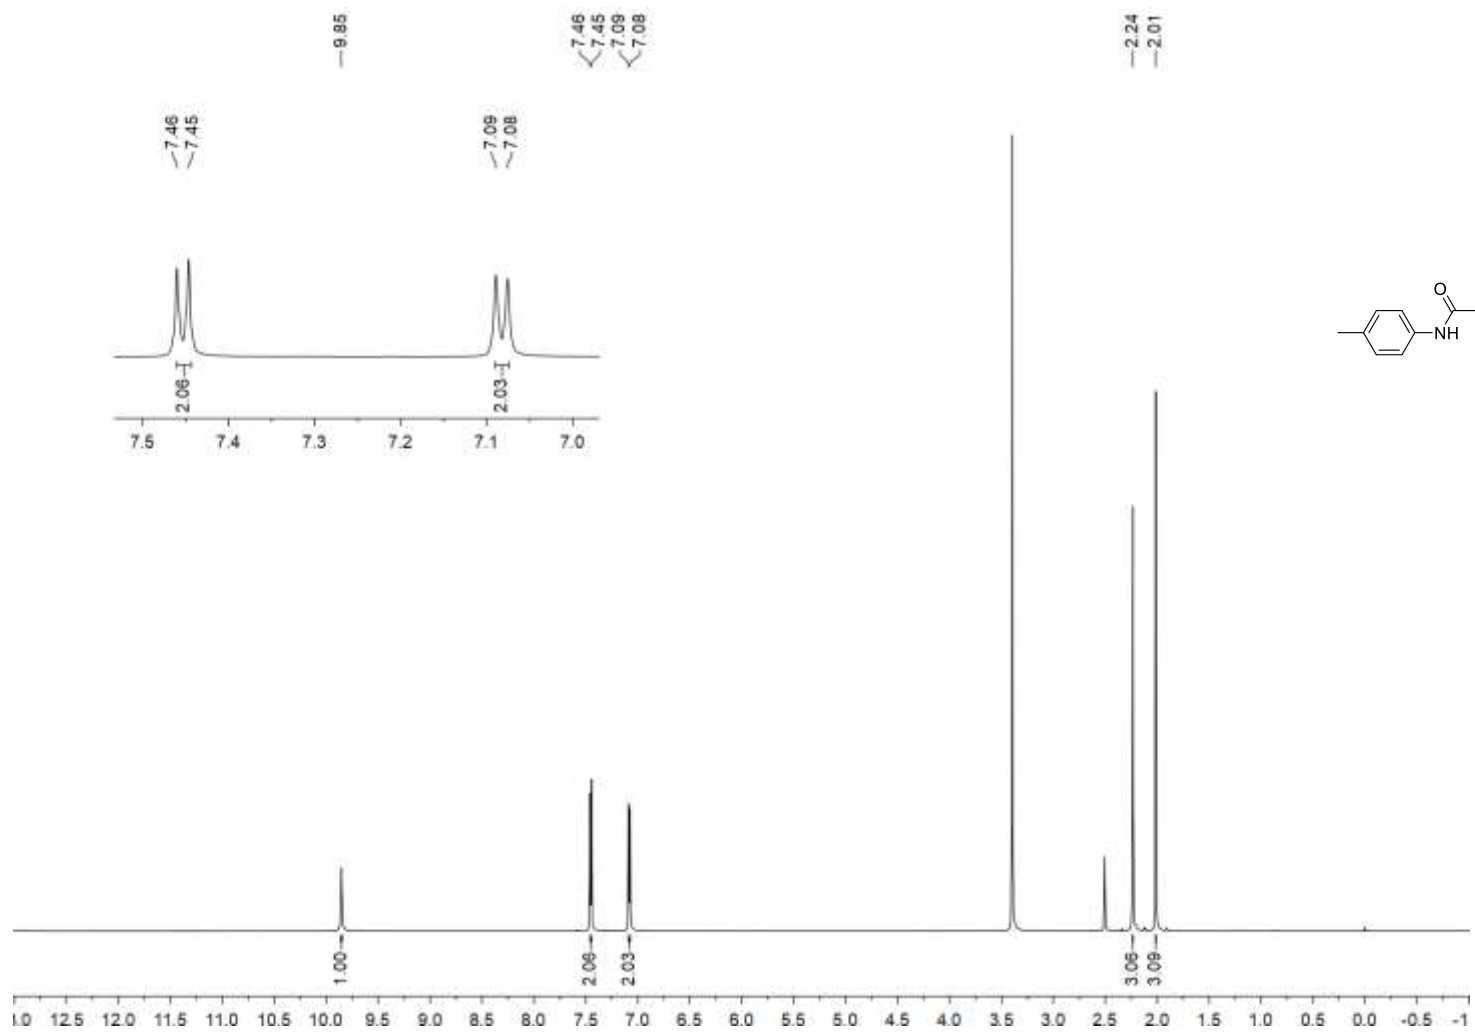

Figure S134.  $^1\text{H}$  NMR (600 MHz,  $\text{DMSO}-d_6$ ) spectra of compound **12**

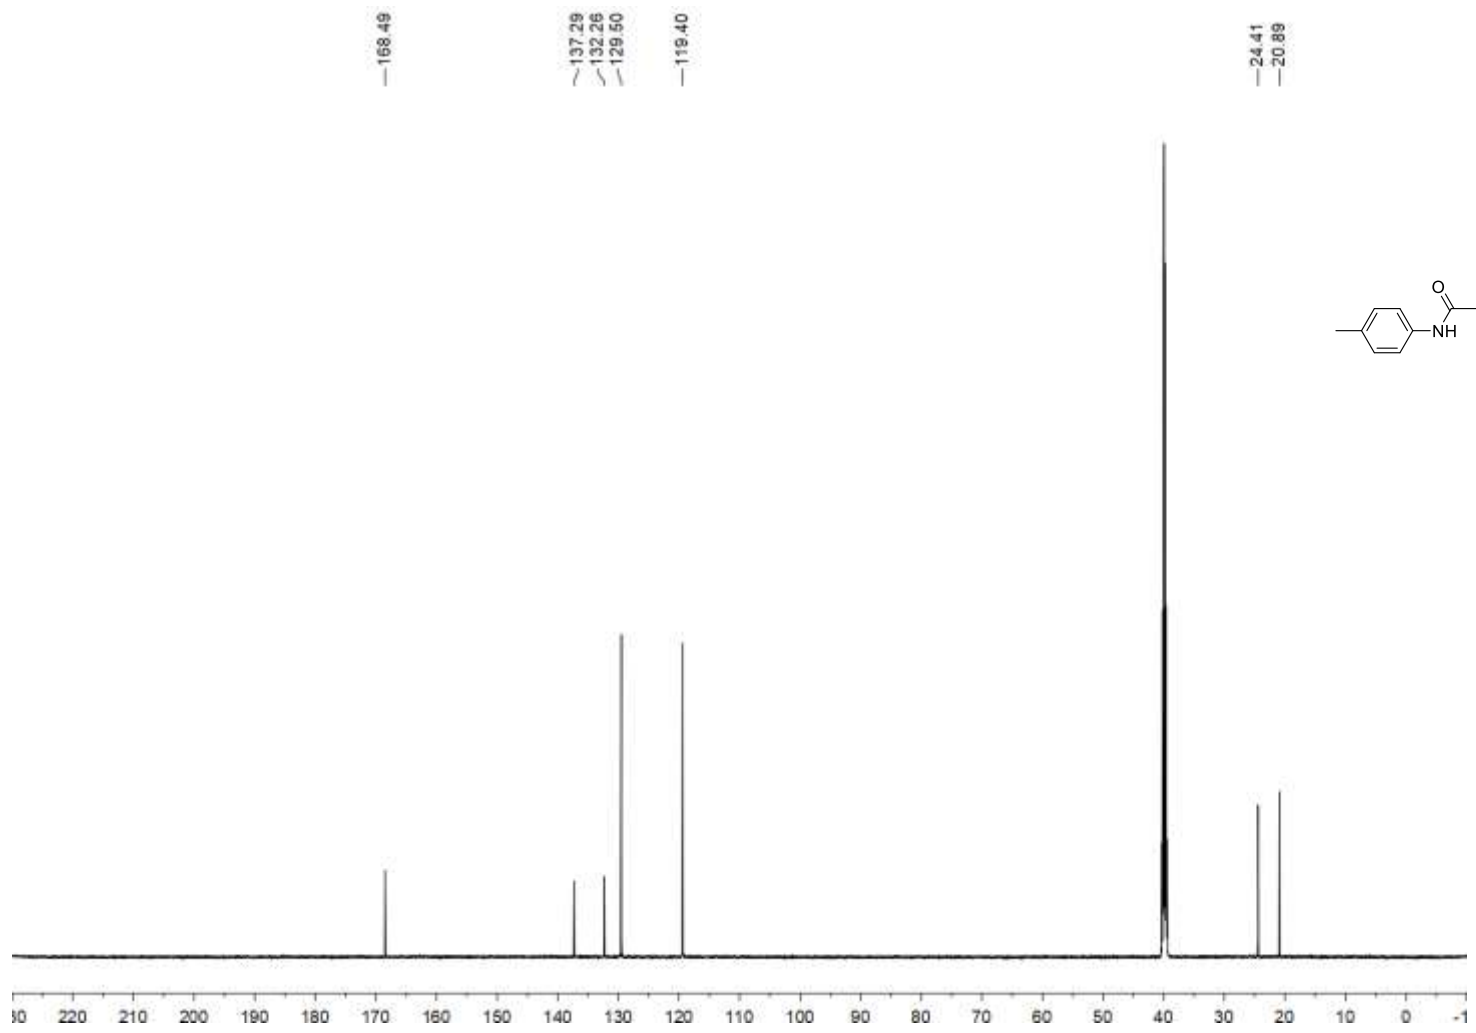

Figure S135.  $^{13}\text{C}$  NMR (150 MHz,  $\text{DMSO-}d_6$ ) spectra of compound **12**

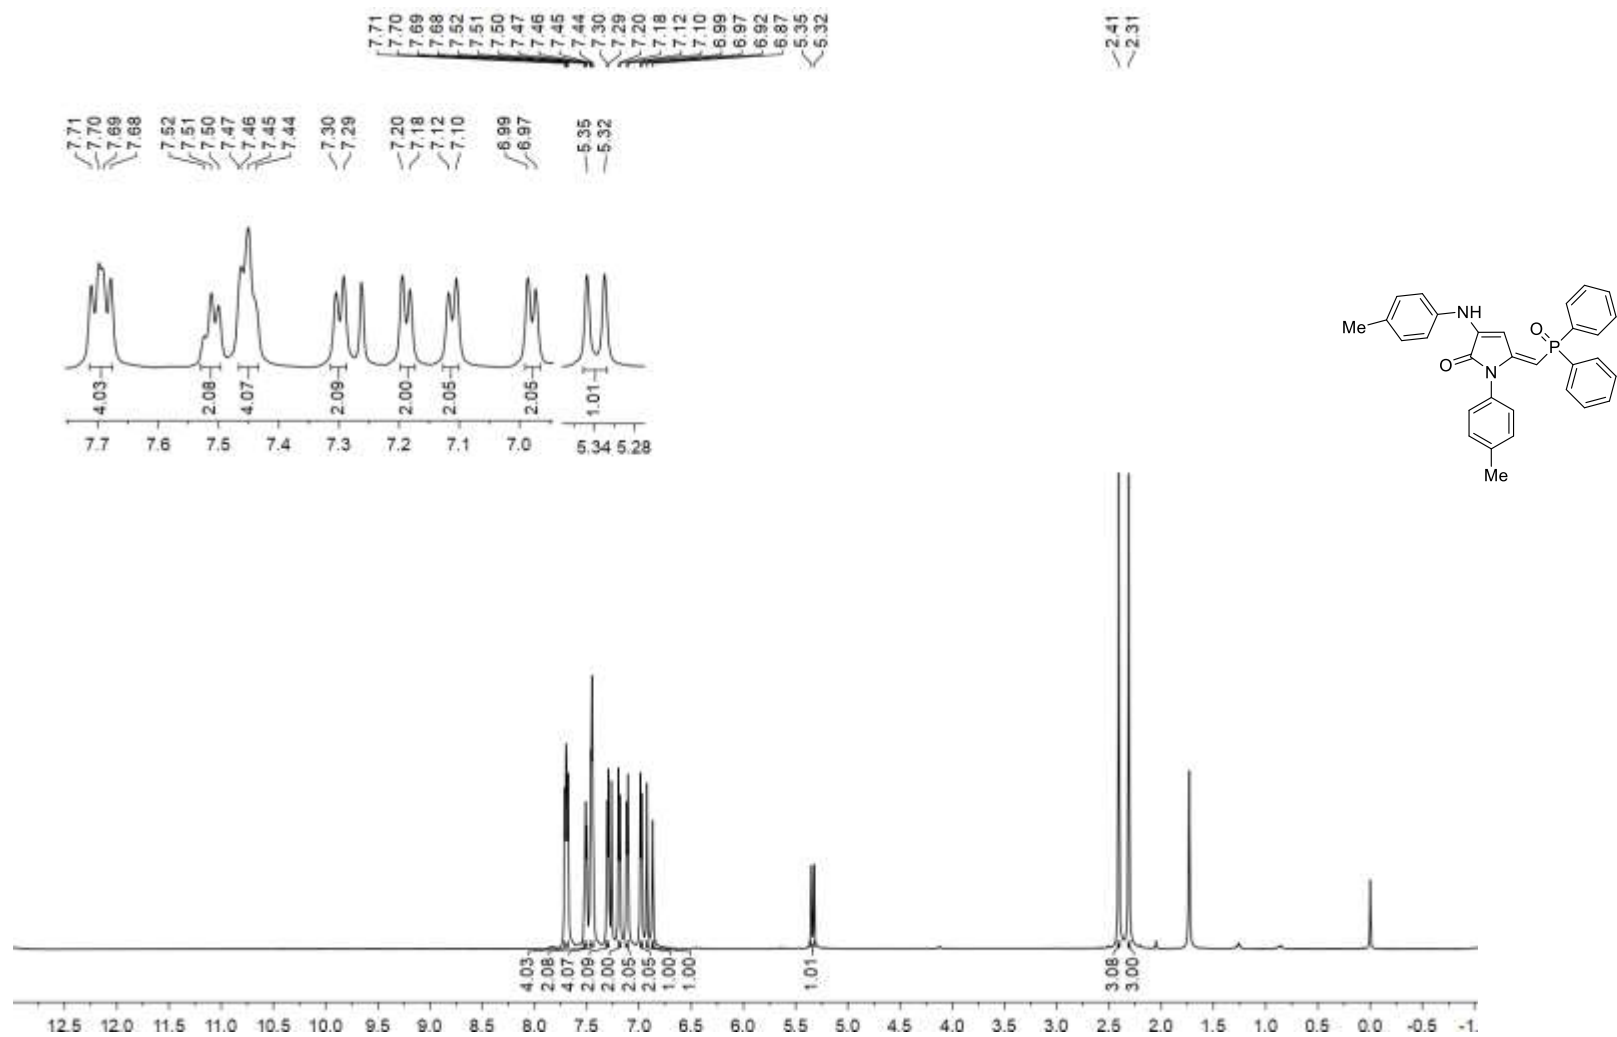

Figure S136. <sup>1</sup>H NMR (600 MHz, CDCl<sub>3</sub>) spectra of compound 13



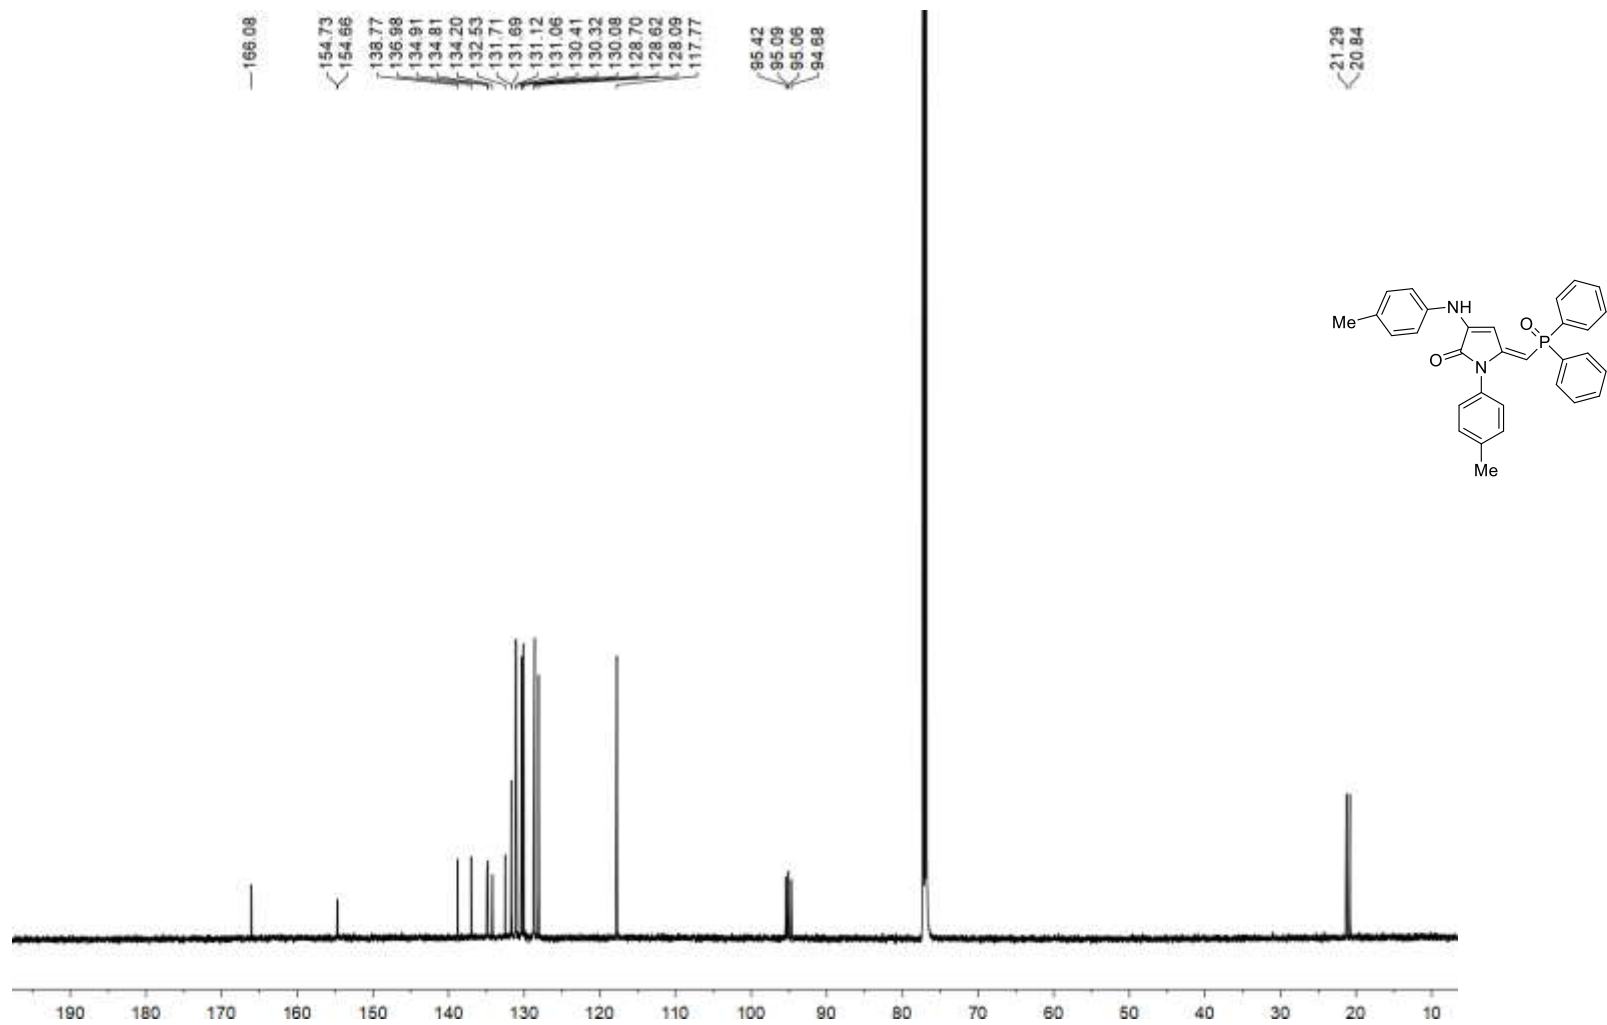

Figure S137.  $^{13}\text{C}$  NMR (150 MHz,  $\text{CDCl}_3$ ) spectra of compound 13

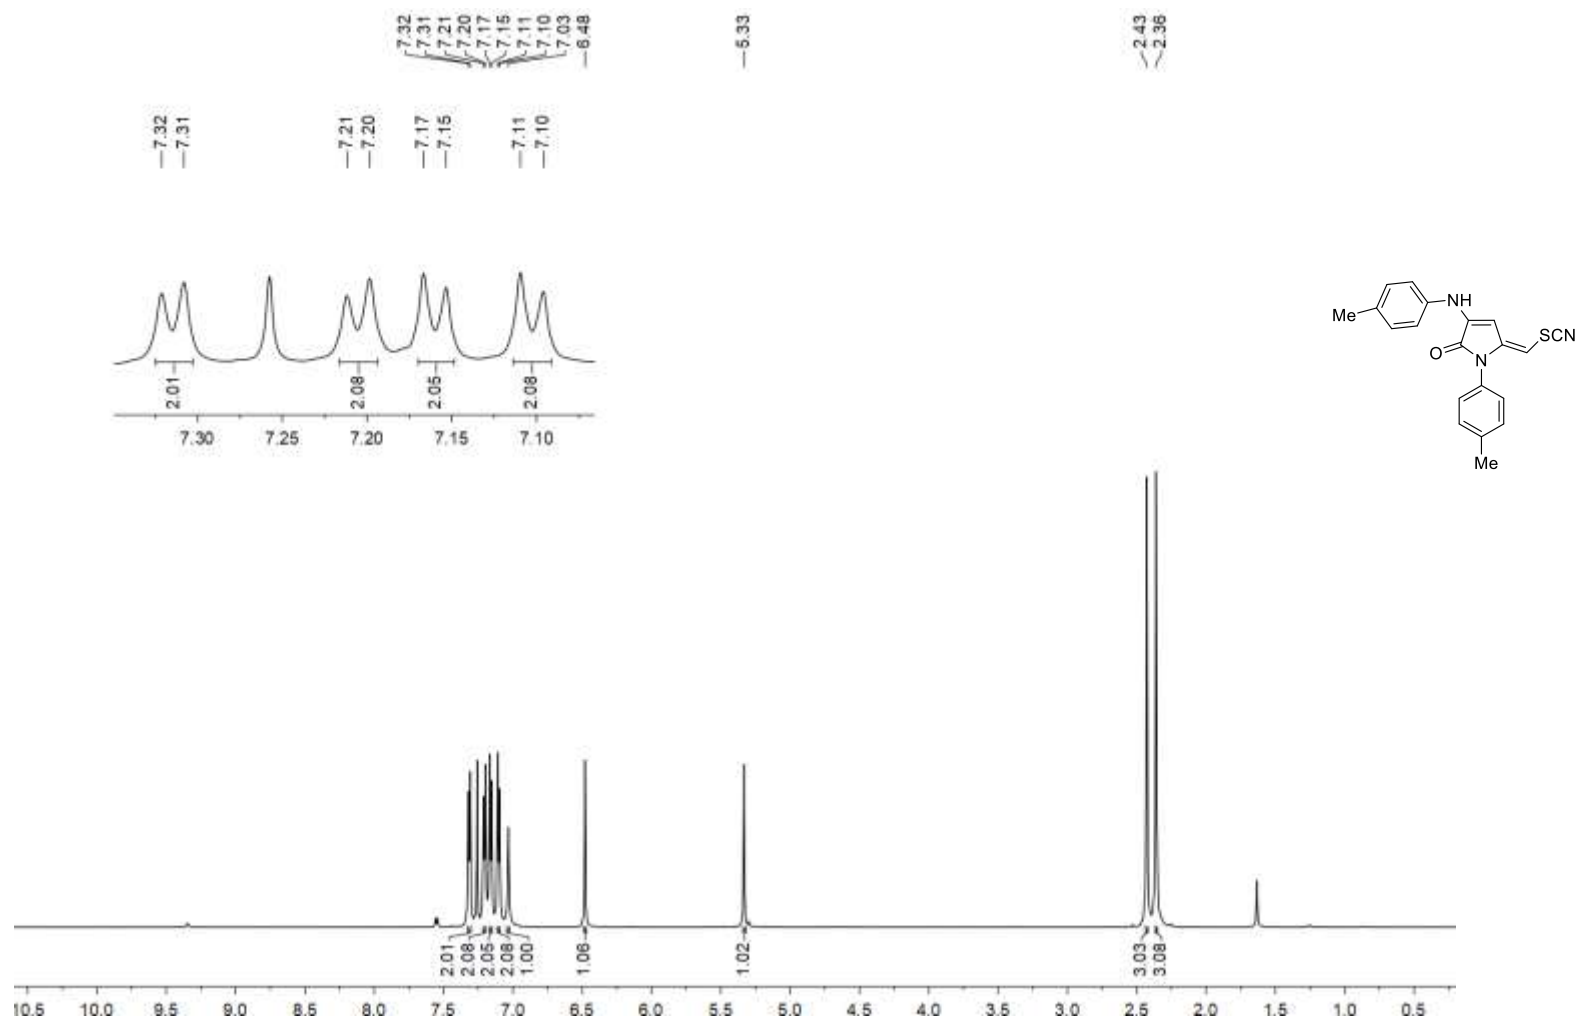

**Figure S138.**  $^1\text{H}$  NMR (600 MHz,  $\text{CDCl}_3$ ) spectra of compound **14**

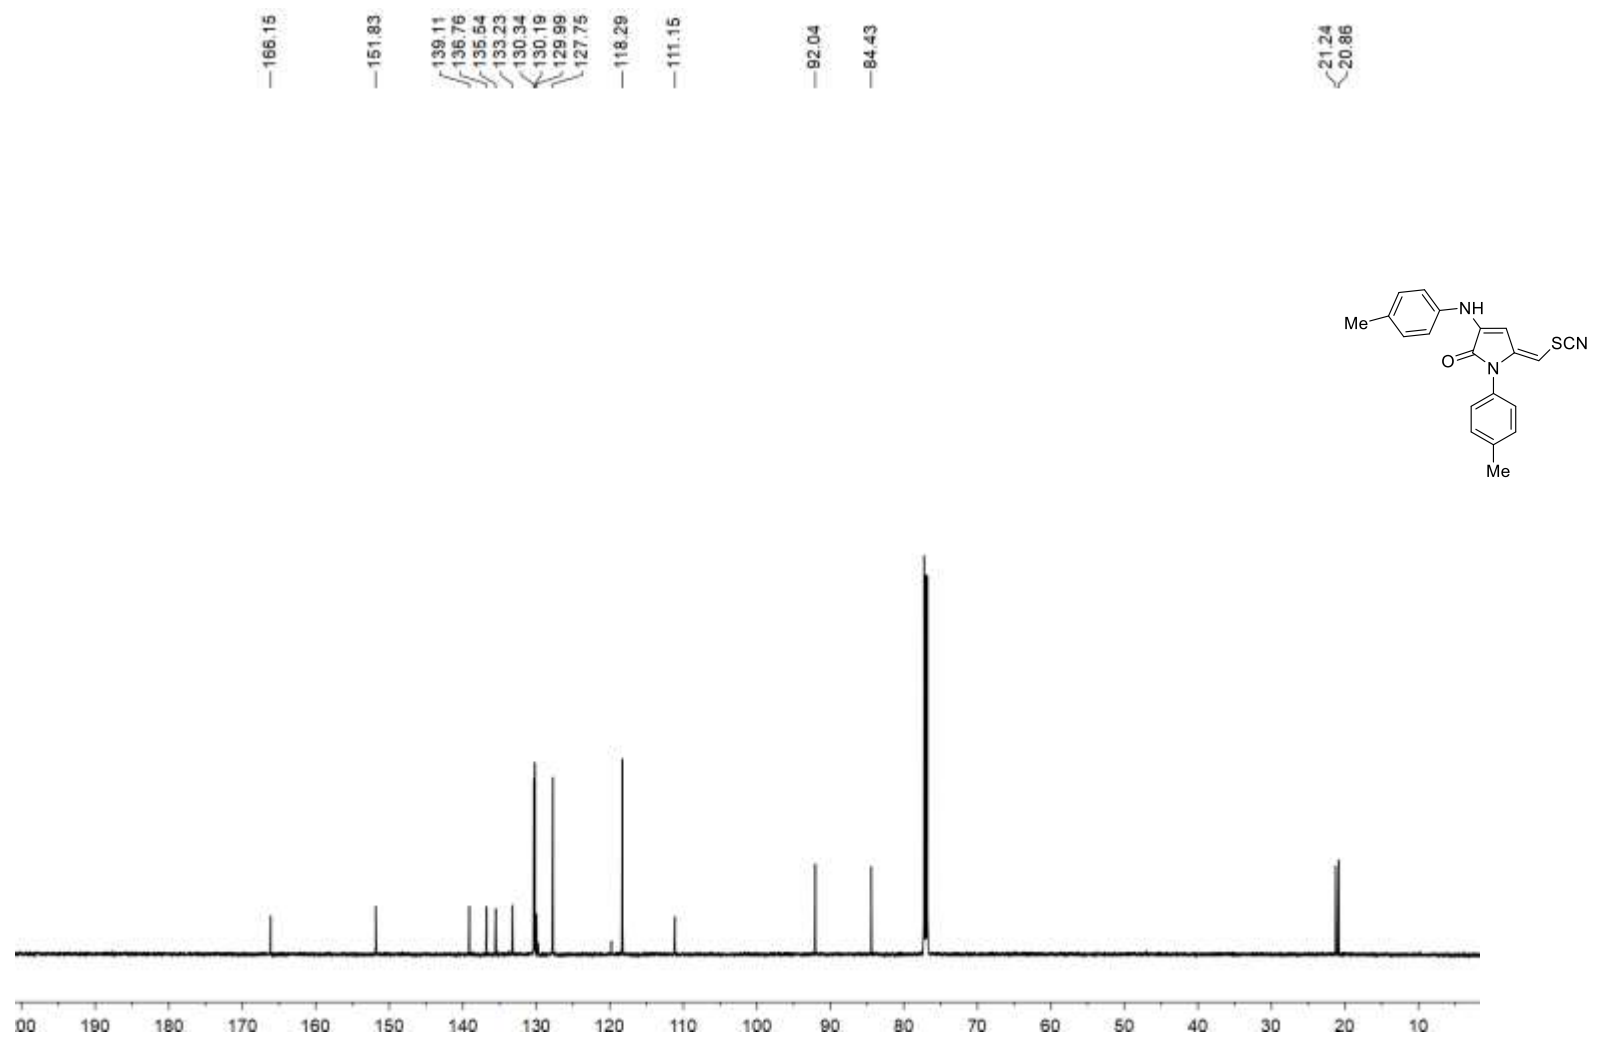

Figure S139.  $^{13}\text{C}$  NMR (150 MHz,  $\text{CDCl}_3$ ) spectra of compound **14**

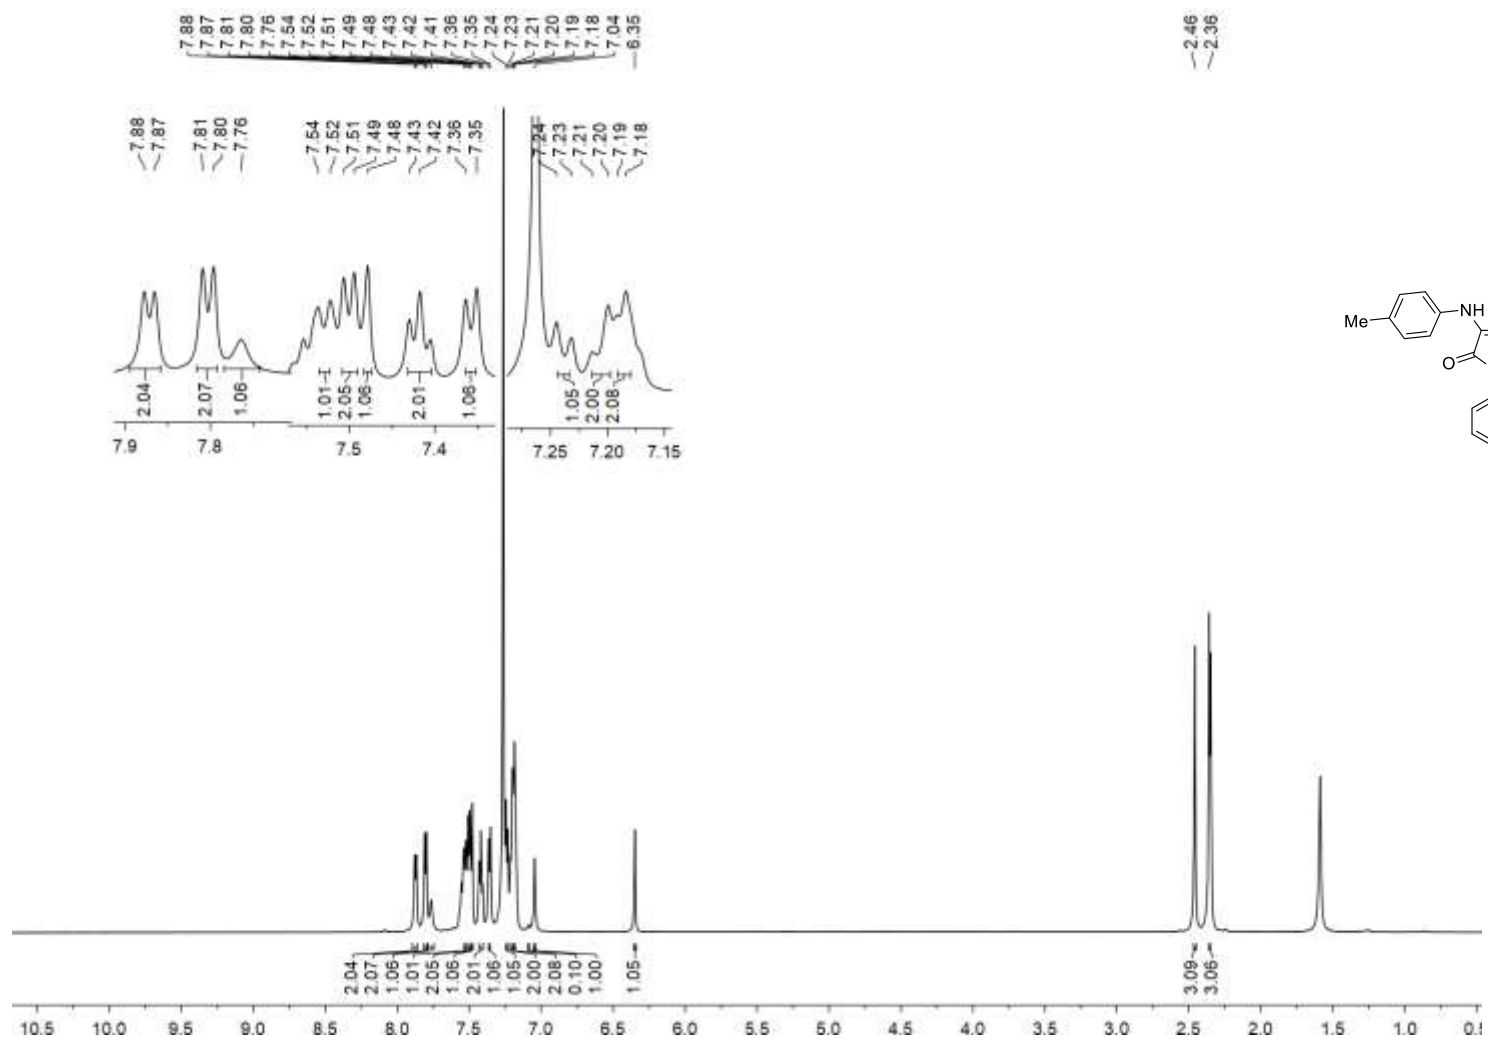

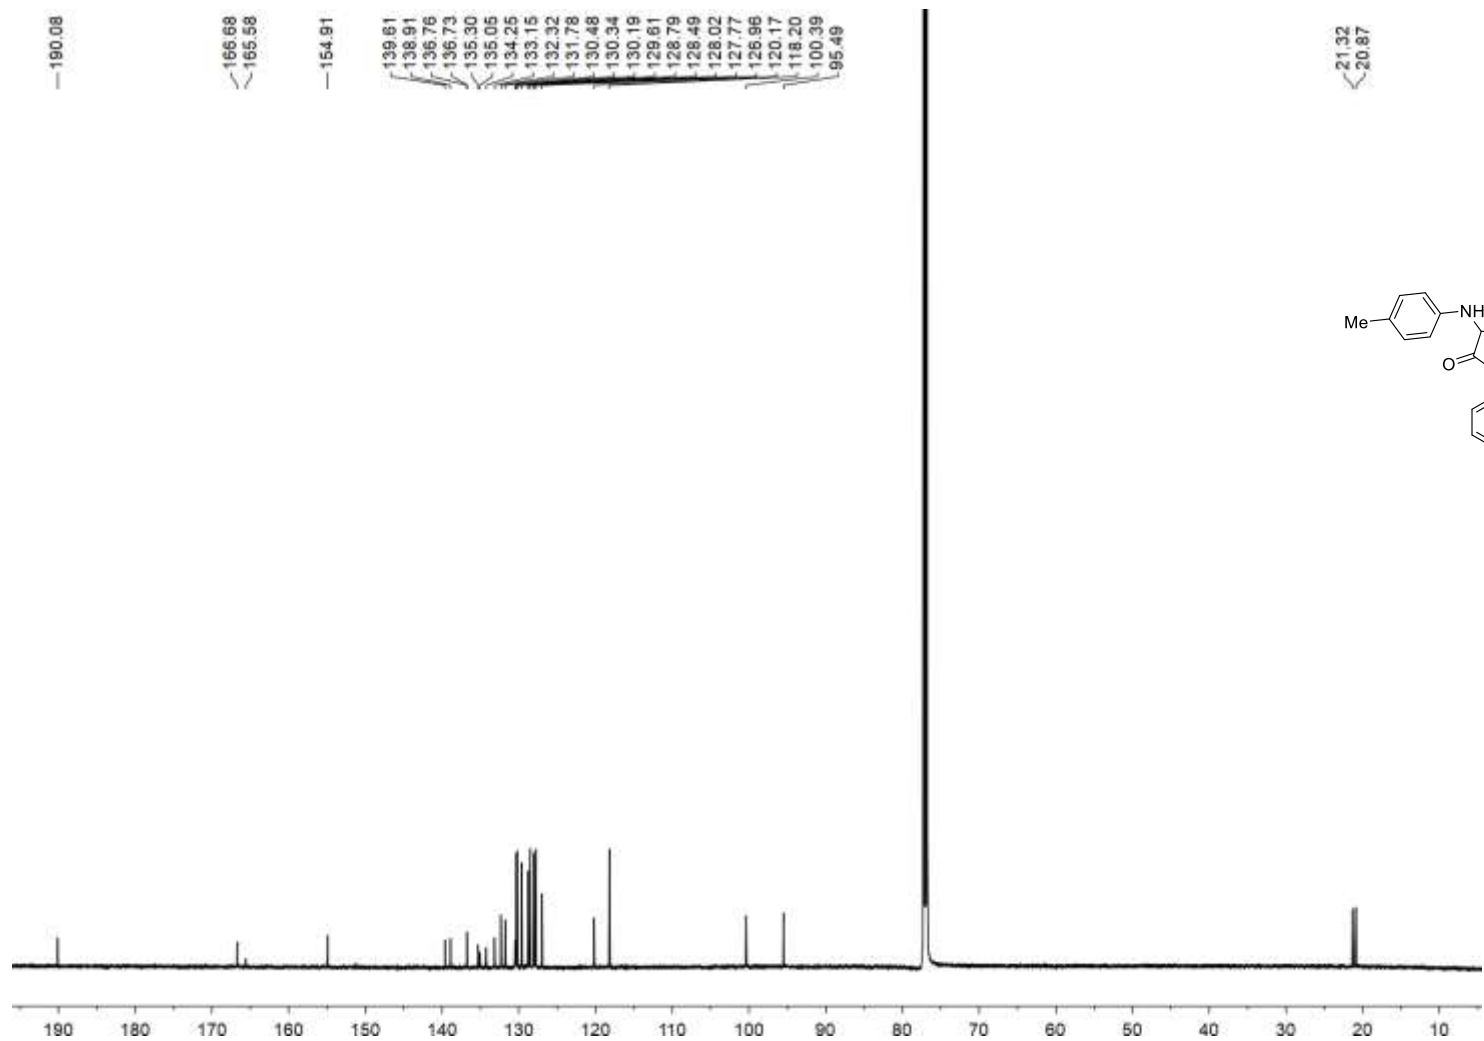

Figure S141. <sup>13</sup>C NMR (150 MHz, CDCl<sub>3</sub>) spectra of compound 15

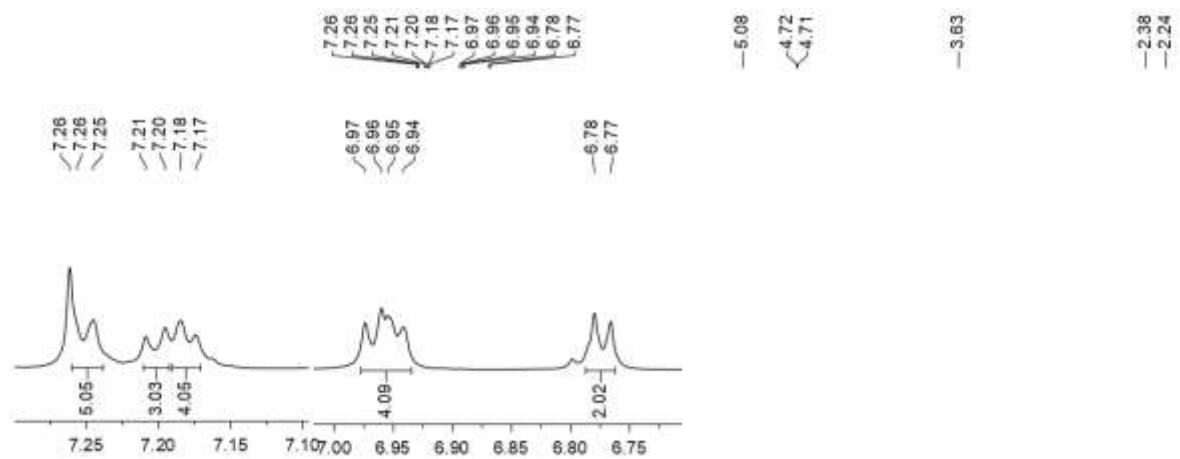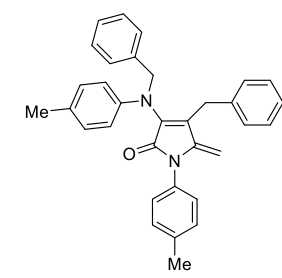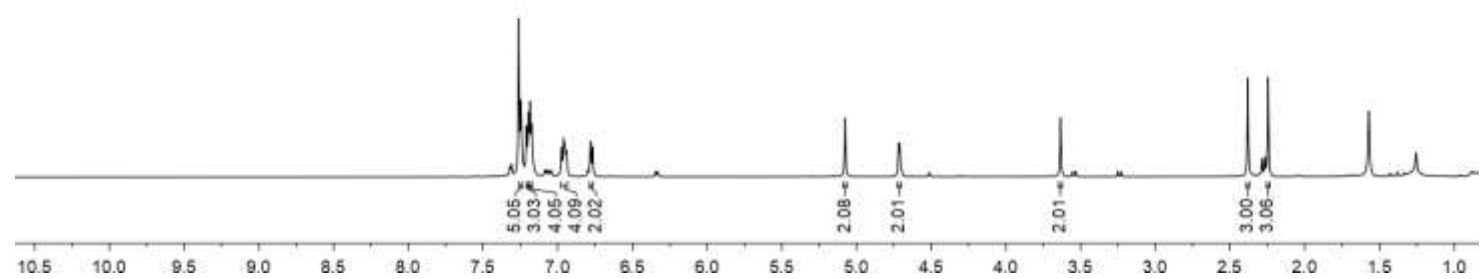

Figure S142. <sup>1</sup>H NMR (600 MHz, CDCl<sub>3</sub>) spectra of compound **16**

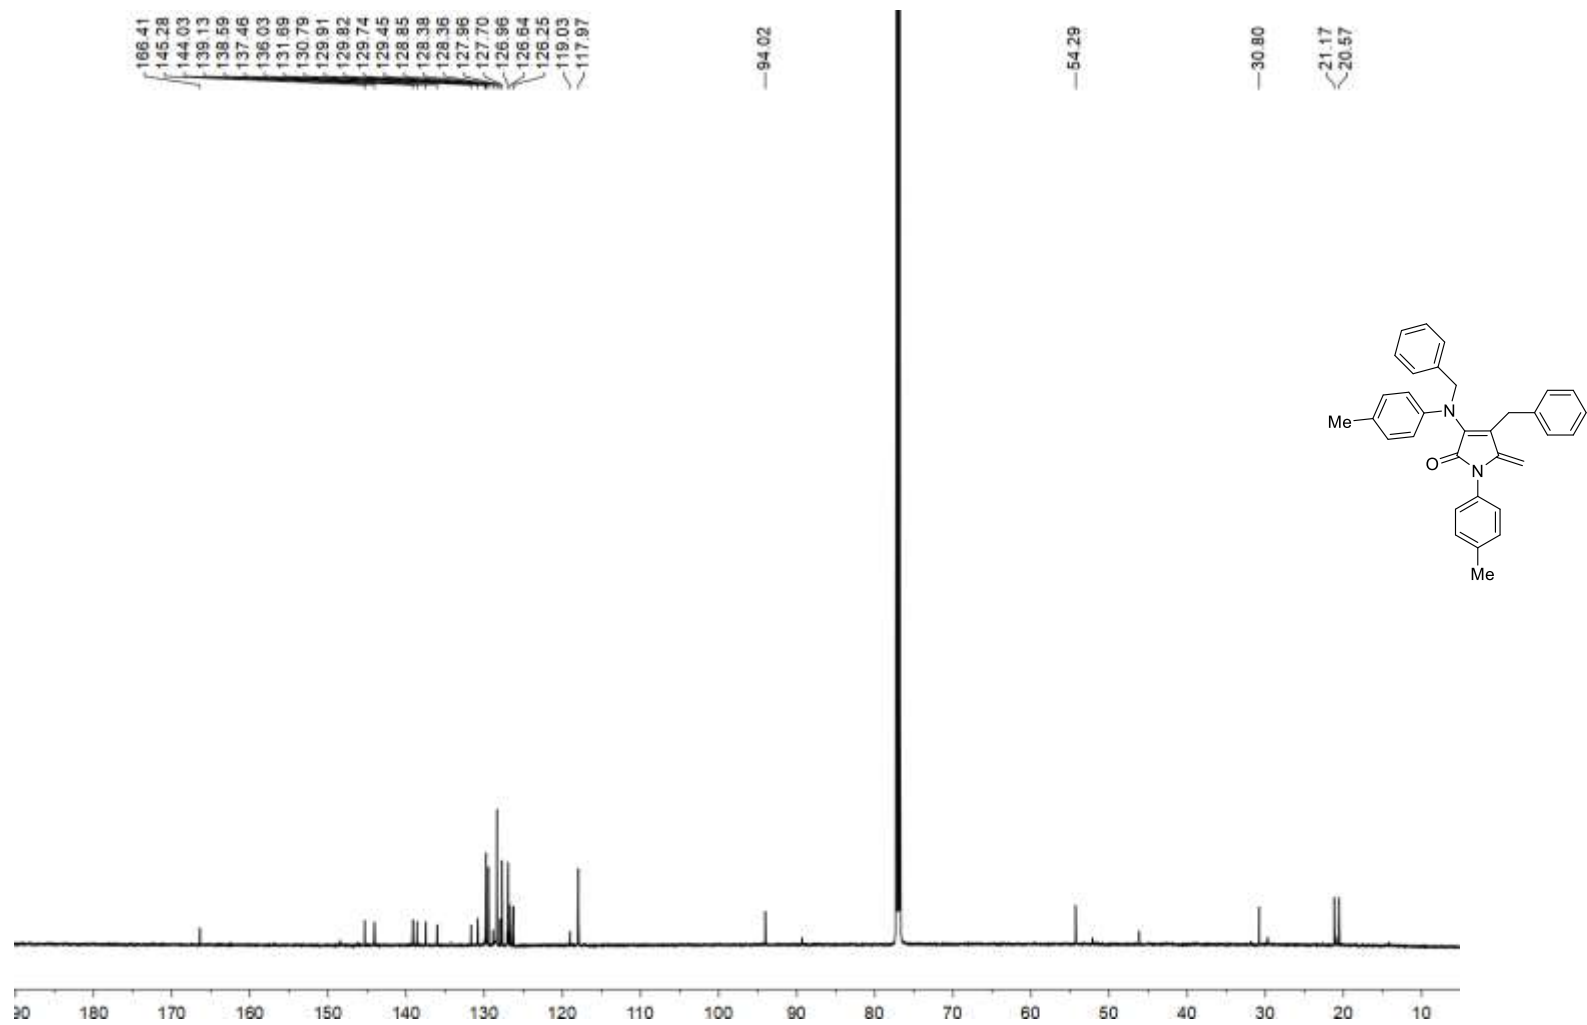

**Figure S143.**  $^{13}\text{C}$  NMR (150 MHz,  $\text{CDCl}_3$ ) spectra of compound **16**

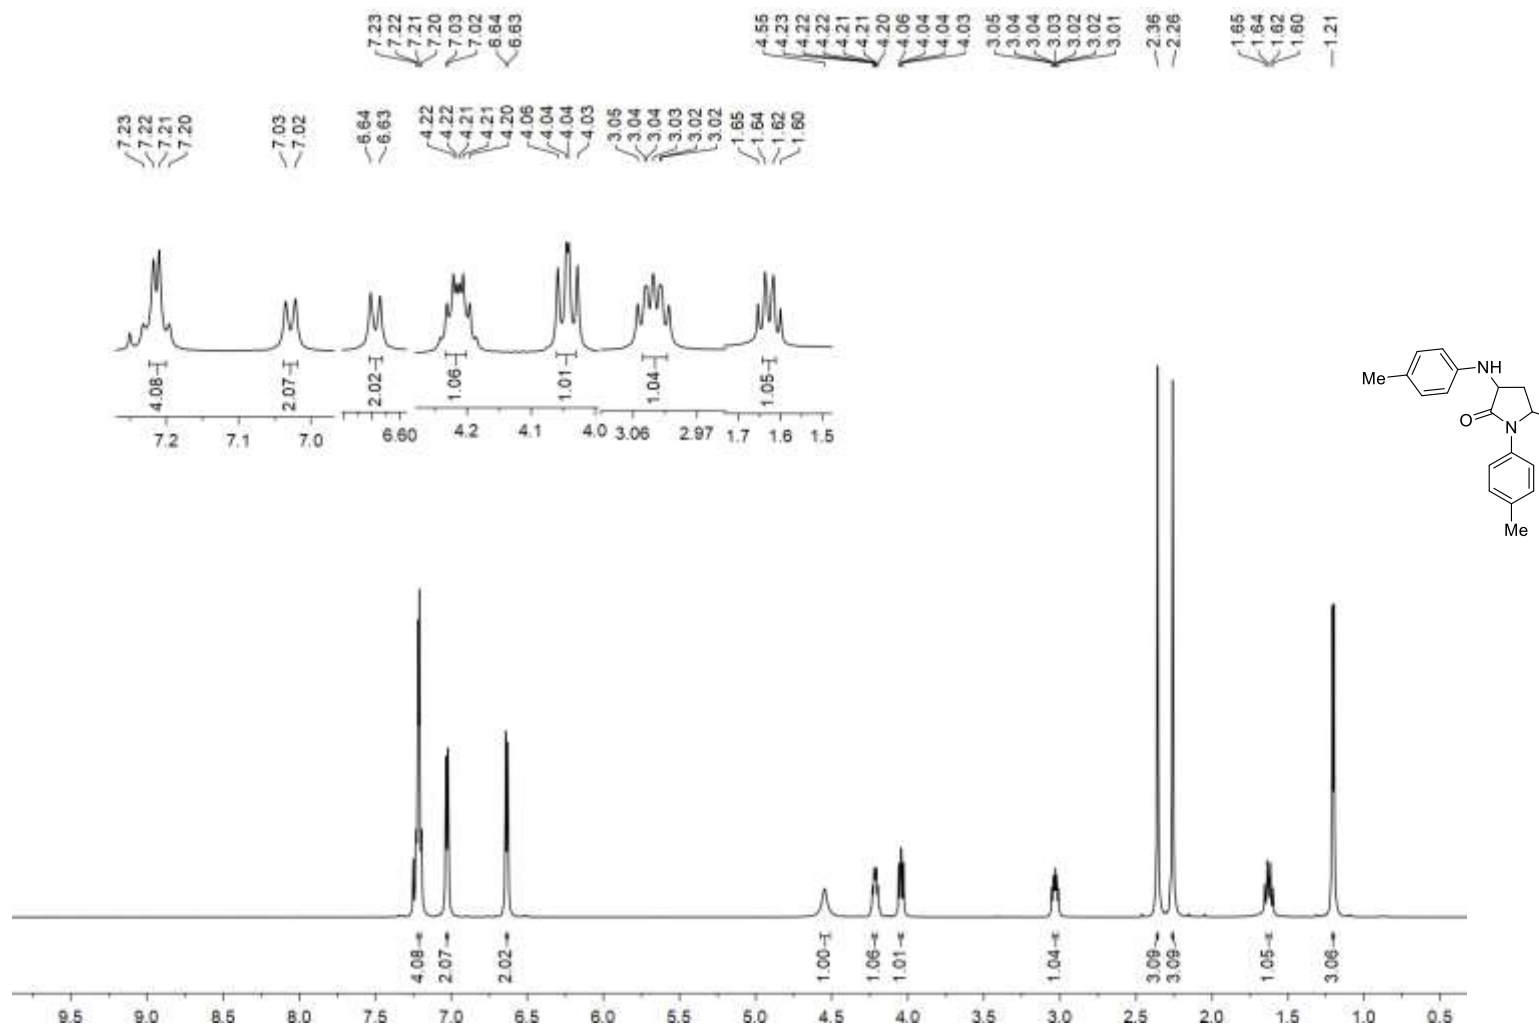

Figure S144. <sup>1</sup>H NMR (600 MHz, CDCl<sub>3</sub>) spectra of compound 17



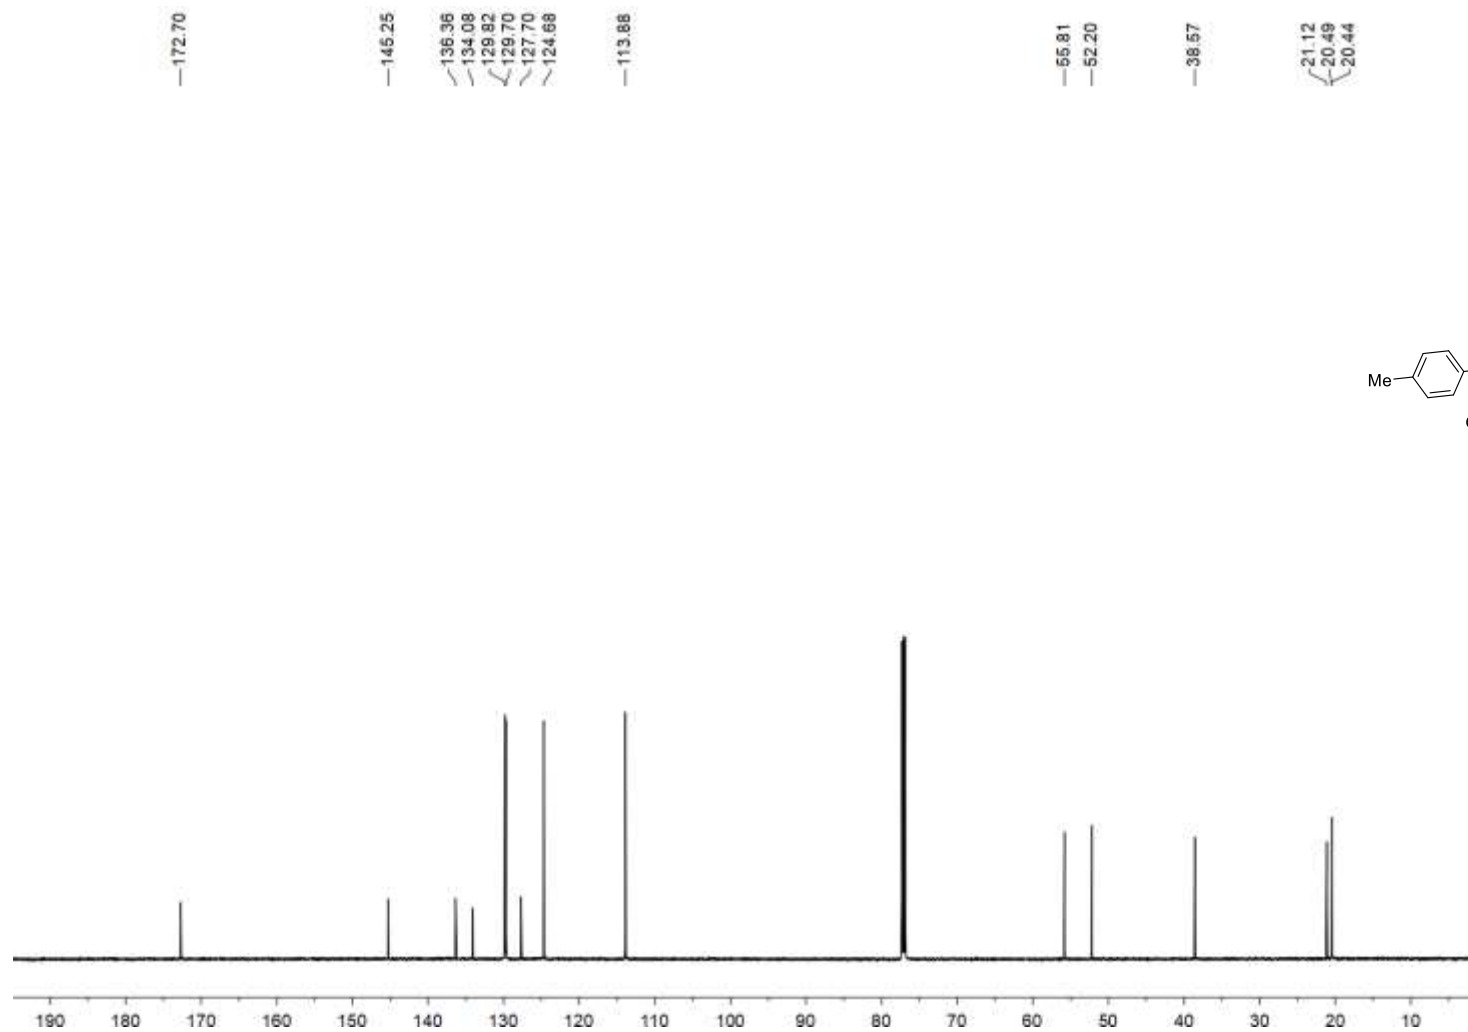

Figure S145.  $^{13}\text{C}$  NMR (150 MHz,  $\text{CDCl}_3$ ) spectra of compound 17

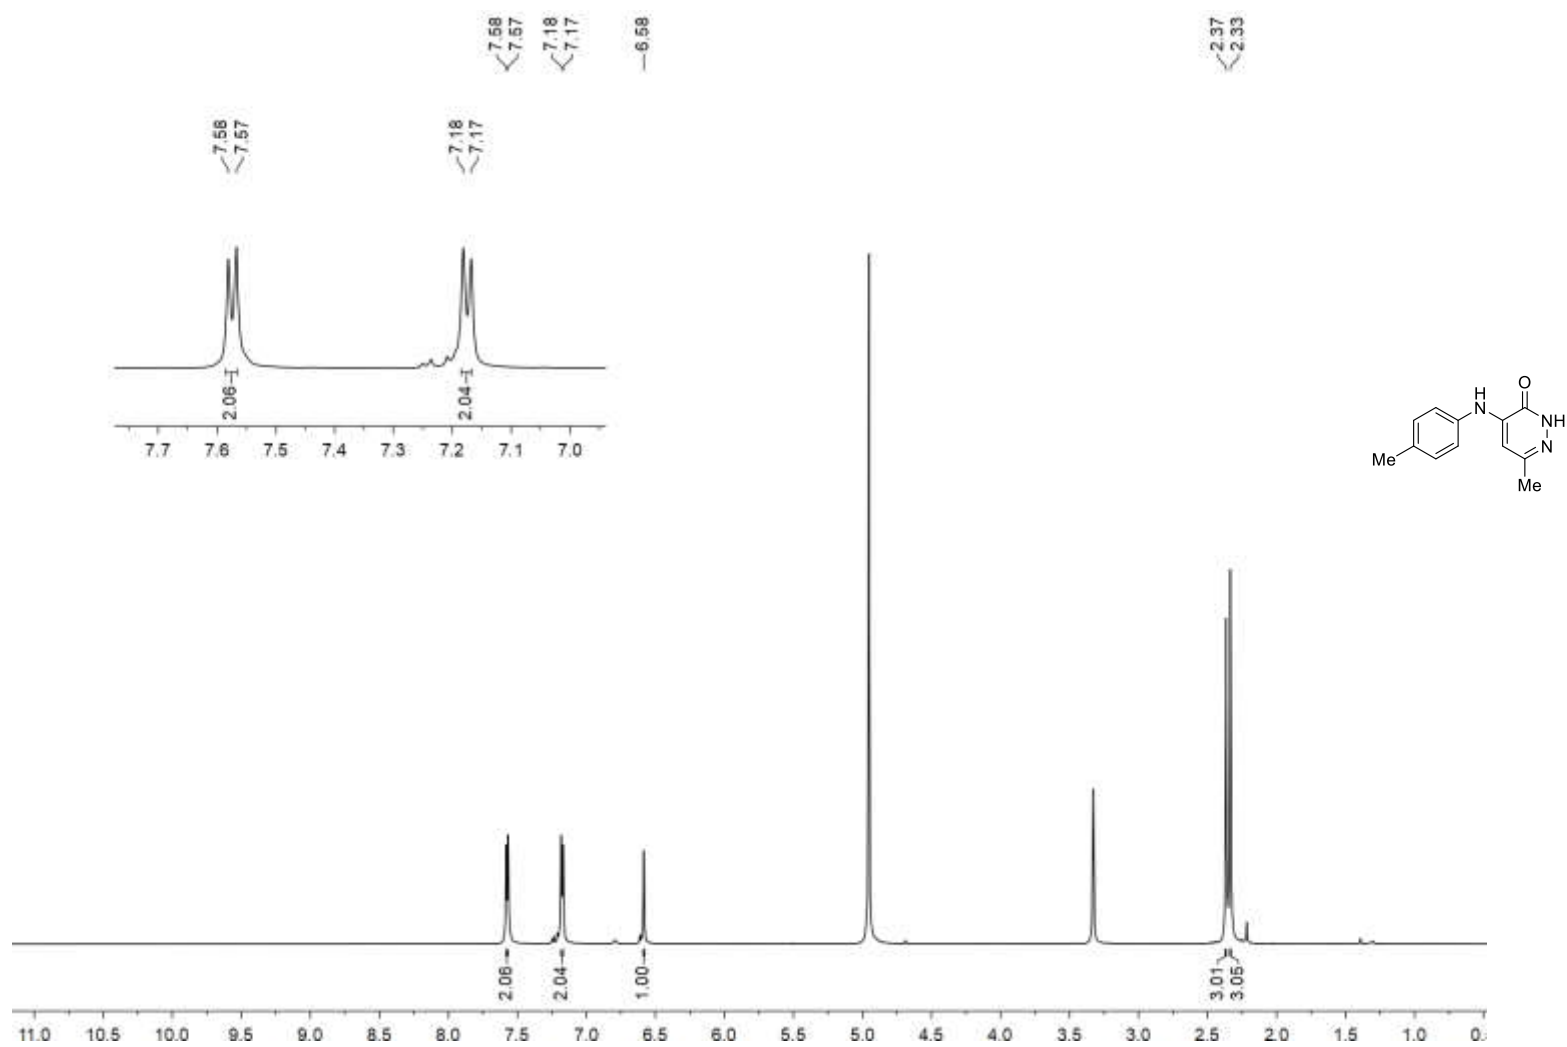

Figure S146. <sup>1</sup>H NMR (600 MHz, CD<sub>3</sub>OD) spectra of compound 18

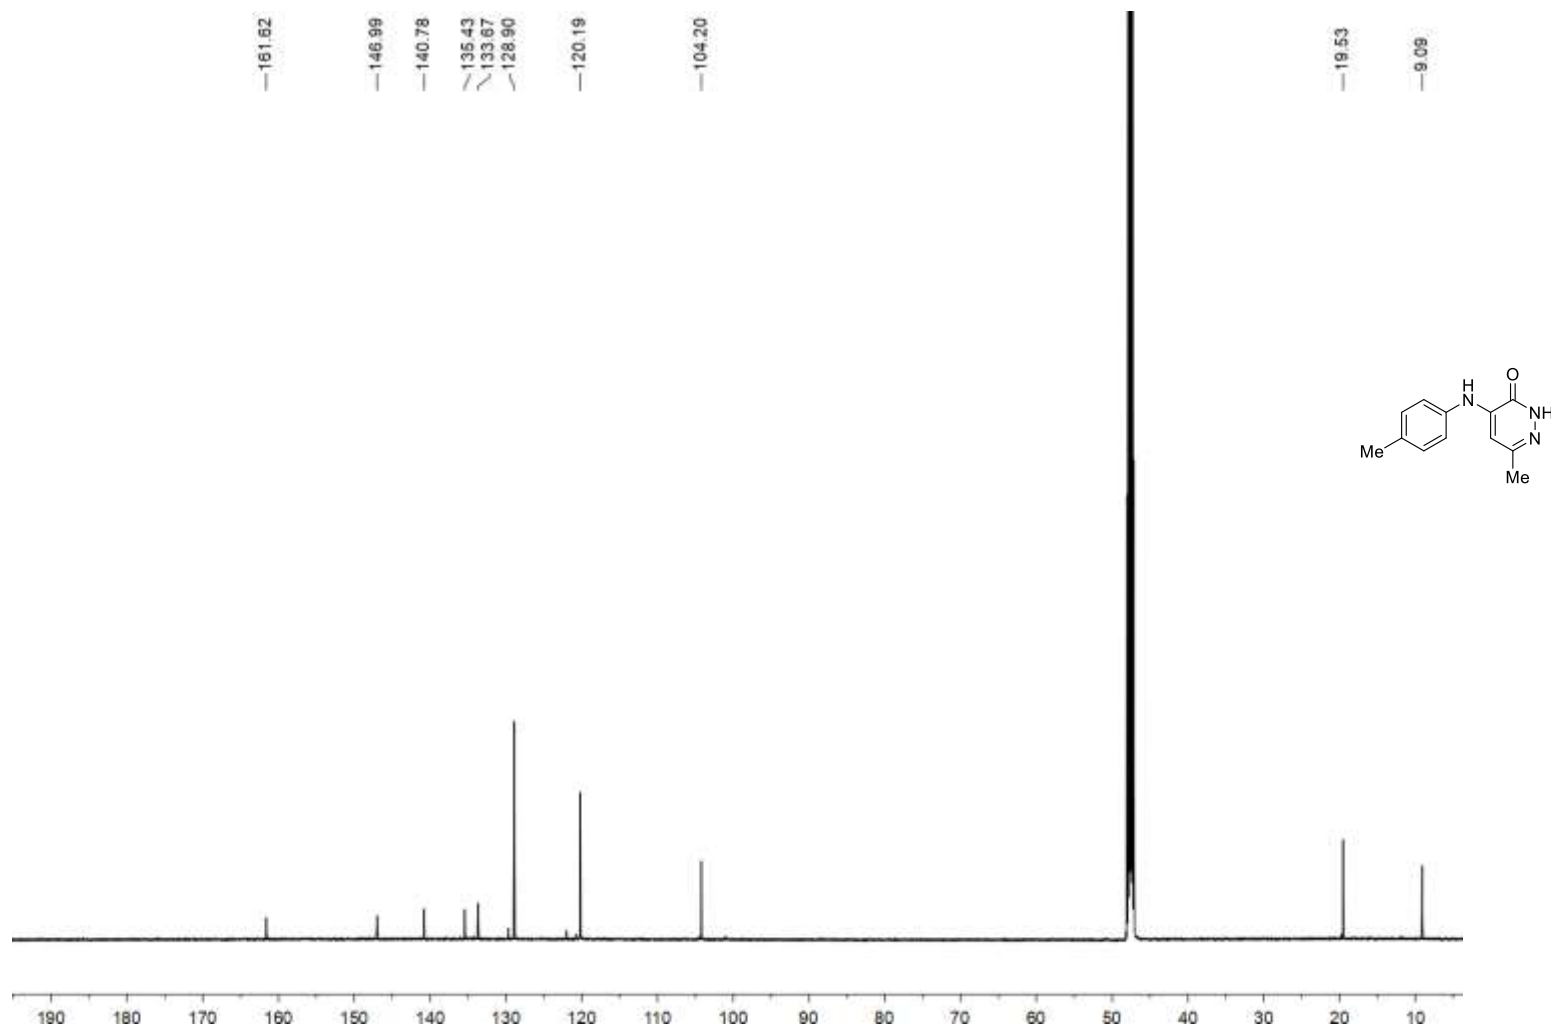

**Figure S147.**  $^{13}\text{C}$  NMR (150 MHz,  $\text{CD}_3\text{OD}$ ) spectra of compound **18**

## 7. References and notes.

1. Jian, L.; Run, L; Chun, Z.; Jian, Z. Copper(II) and 1,1'-trimethylene-2,2'-biimidazole-promoted arylation of acetylacetone with aryl iodides. *Chin. J. Chem.* **2011**, *29*, 309.
2. Lee, D.-H.; Taher, A.; Hossain, S.; Jin, M.-J. An efficient and general method for the Heck and Buchwald–Hartwig coupling reactions of aryl chlorides. *Org. Lett.*, **2011**, *13*, 5540.
3. CCDC 2226645, 2226644, and 2226646 contain the supplementary crystallographic data for compound **4b**, **7b** and **8b**. These data can be obtained free of charge from The Cambridge Crystallographic Data Center via [www.ccdc.cam.ac.uk/data\\_request/cif](http://www.ccdc.cam.ac.uk/data_request/cif).
